# Supplementary material for: Evolution of Intrinsic Disorder in Protein Loops
Source: Preprints.org preprint supplement (doi:10.20944/preprints202309.1250.v1), 2023-09-19
Supplement: Supplementary file 1 [file supplementary]

## Sheet: prot_dis_loops_dataset
Table S2. Prototypes and their structural, functional and phylogenomic annotations.
classification	type	length	class	subclass	mean_ntermlength	mean_ctermlength	mean_distance	mean_theta	mean_rho	mean_delta	mean_loop_struc_length	mean_disorder	SCOP ID	FF description	Age (nd)	Molecular function	Function description	venn_group	disorder_type
DS.EH.6.17.1	EH	6	17	1	5.25	8.25	7.63475	131.079	61.7255	70.4609	19.5	0.495978	c.37.1.12	ABC transporter ATPase domain-like	0	General	Small molecule binding	ABEV	high_disorder
DS.EH.7.6.1	EH	7	6	1	5.09091	15.5455	17.4403	160.076	250.902	65.7465	27.6364	0.294012	c.37.1.12	ABC transporter ATPase domain-like	0	General	Small molecule binding	ABEV	moderate_disorder
DS.HE.10.3.1	HE	10	3	1	9	4.75	17.3347	154.575	243.379	109.492	23.75	0.305254	c.37.1.19	Tandem AAA-ATPase domain	0.00429184	General	Small molecule binding	ABEV	high_disorder
DS.EH.5.6.3	EH	5	6	3	2.83333	12.6667	10.8277	138.301	217.06	70.1915	20.5	0.688889	c.37.1.19	Tandem AAA-ATPase domain	0.00429184	General	Small molecule binding	ABEV	high_disorder
DS.EH.1.13.3	EH	1	13	3	5	12.6	5.6732	105.397	27.3	53.9678	18.6	0.36	c.37.1.19	Tandem AAA-ATPase domain	0.00429184	General	Small molecule binding	ABEV	high_disorder
DS.HH.7.15.1	HH	7	15	1	16.75	10.5	12.6333	121.841	313.128	126.668	34.25	0.277101	c.37.1.20	Extended AAA-ATPase domain	0.00858369	General	Small molecule binding	ABEV	moderate_disorder
DS.HH.6.2.1	HH	6	2	1	13	11.5	15.6128	123.076	309.179	127.528	30.5	0.400812	c.37.1.20	Extended AAA-ATPase domain	0.00858369	General	Small molecule binding	ABEV	high_disorder
DS.HE.4.9.13	HE	4	9	13	4	4.4	9.3324	83.0748	17.428	38.5486	12.4	0.676923	c.37.1.20	Extended AAA-ATPase domain	0.00858369	General	Small molecule binding	ABEV	high_disorder
DS.HE.3.26.8	HE	3	26	8	4	4	7.27467	66.53	355.281	20.6243	11	0.666667	c.37.1.20	Extended AAA-ATPase domain	0.00858369	General	Small molecule binding	ABEV	high_disorder
DS.GH.2.2.7	GH	2	2	7	3	7.90909	9.50909	143.568	352.975	86.2961	12.9091	0.854773	c.37.1.20	Extended AAA-ATPase domain	0.00858369	General	Small molecule binding	ABEV	high_disorder
DS.EH.5.12.1	EH	5	12	1	6.4375	9.8125	8.48369	145.282	55.8452	103.773	21.25	0.428094	c.37.1.8	G proteins	0.0128755	General	Small molecule binding	ABEV	high_disorder
DS.EG.1.17.1	EG	1	17	1	5.95	3	5.18575	27.0558	332.825	41.16	9.95	0.826667	c.37.1.8	G proteins	0.0128755	General	Small molecule binding	ABEV	high_disorder
DS.EG.1.31.1	EG	1	31	1	7	3	5.42229	23.2171	293.413	35.912	11	0.780952	c.37.1.8	G proteins	0.0128755	General	Small molecule binding	ABEV	high_disorder
DS.EH.3.12.1	EH	3	12	1	6.86667	9.2	6.69633	153.951	168.439	78.4991	19.0667	0.152236	c.37.1.8	G proteins	0.0128755	General	Small molecule binding	ABEV	moderate_disorder
DS.EH.3.12.3	EH	3	12	3	6.85714	13.5714	7.06629	152.452	188.403	79.7617	23.4286	0.276673	c.37.1.8	G proteins	0.0128755	General	Small molecule binding	ABEV	moderate_disorder
DS.EH.5.13.1	EH	5	13	1	7.06667	10.8	8.61927	147.706	36.958	109.482	22.8667	0.414188	c.37.1.8	G proteins	0.0128755	General	Small molecule binding	ABEV	high_disorder
DS.EH.6.20.1	EH	6	20	1	6.85714	12.1429	11.062	143.822	206.304	118.265	25	0.332747	c.37.1.8	G proteins	0.0128755	General	Small molecule binding	ABEV	high_disorder
DS.EH.8.7.1	EH	8	7	1	3.16667	15.5	8.21767	154.893	122.587	71.4112	26.6667	0.336851	c.37.1.8	G proteins	0.0128755	General	Small molecule binding	ABEV	high_disorder
DS.HE.4.17.6	HE	4	17	6	4	6.66667	9.42233	93.329	9.691	32.9887	14.6667	0.444444	c.37.1.8	G proteins	0.0128755	General	Small molecule binding	ABEV	high_disorder
DS.EG.1.34.1	EG	1	34	1	6.6	6	6.5546	66.5516	344.808	33.446	13.6	0.503297	c.37.1.8	G proteins	0.0128755	General	Small molecule binding	ABEV	high_disorder
DS.EG.1.1.8	EG	1	1	8	5.06977	3.06977	6.37405	64.1134	283.075	13.6997	9.13953	0.910114	b.40.4.5	Cold shock DNA-binding domain-like	0.0171674	Information	DNA replication, recombination, repair	ABEV	high_disorder
DS.BN.4.1.3	BN	4	1	3	6.70833	6.01389	4.72083	171.976	8.63364	97.1934	16.7222	0.623382	b.40.4.5	Cold shock DNA-binding domain-like	0.0171674	Information	DNA replication, recombination, repair	ABEV	high_disorder
DS.BK.3.54.1	BK	3	54	1	3.5	5.625	7.71338	122.79	142.296	82.404	12.125	0.580128	b.40.4.5	Cold shock DNA-binding domain-like	0.0171674	Information	DNA replication, recombination, repair	ABEV	high_disorder
DS.HH.2.6.5	HH	2	6	5	9.88235	9.47059	5.27294	74.4125	96.7372	84.8011	21.3529	0.442292	c.37.1.10	Nitrogenase iron protein-like	0.0257511	General	Small molecule binding	ABEV	high_disorder
DS.HE.4.8.1	HE	4	8	1	12.1852	4.32099	9.4429	149.836	109.905	111.083	20.5062	0.472159	c.37.1.10	Nitrogenase iron protein-like	0.0257511	General	Small molecule binding	ABEV	high_disorder
DS.BK.3.13.1	BK	3	13	1	6.07143	3	11.7226	27.2149	100.114	13.6626	12.0714	0.90873	c.3.1.5	FAD/NAD-linked reductases, N-terminal and central domains	0.0300429	General	Small molecule binding	ABEV	high_disorder
DS.BK.2.15.3	BK	2	15	3	4.2	5	6.8774	101.029	80.4428	37.7072	11.2	0.871429	c.3.1.5	FAD/NAD-linked reductases, N-terminal and central domains	0.0300429	General	Small molecule binding	ABEV	high_disorder
DS.BK.1.2.2	BK	1	2	2	5.4	3.91429	5.36363	103.688	75.2728	52.8795	10.3143	0.813333	c.3.1.5	FAD/NAD-linked reductases, N-terminal and central domains	0.0300429	General	Small molecule binding	ABEV	high_disorder
DS.BN.8.1.1	BN	8	1	1	6.3	6.25	4.87315	142.457	340.188	99.3013	20.55	0.509934	d.108.1.1	N-acetyl transferase, NAT	0.0343348	Metabolism	Transferases	ABEV	high_disorder
DS.GH.4.7.1	GH	4	7	1	3	15	8.59743	72.7993	62.6273	69.0891	22	0.701299	d.108.1.1	N-acetyl transferase, NAT	0.0343348	Metabolism	Transferases	ABEV	high_disorder
DS.EG.2.3.4	EG	2	3	4	5	3	9.40671	128.174	171.333	38.2867	10	1	d.108.1.1	N-acetyl transferase, NAT	0.0343348	Metabolism	Transferases	ABEV	high_disorder
DS.GH.4.1.2	GH	4	1	2	3	15	8.95925	69.7747	40.177	64.2463	22	0.602273	d.108.1.1	N-acetyl transferase, NAT	0.0343348	Metabolism	Transferases	ABEV	high_disorder
DS.HE.3.40.1	HE	3	40	1	9.92857	6.71429	7.5435	114.354	86.3056	86.9235	19.6429	0.528243	d.108.1.1	N-acetyl transferase, NAT	0.0343348	Metabolism	Transferases	ABEV	high_disorder
DS.HE.3.30.4	HE	3	30	4	13.5	7.75	6.7195	107.646	172.763	82.083	24.25	0.356985	d.108.1.1	N-acetyl transferase, NAT	0.0343348	Metabolism	Transferases	ABEV	high_disorder
DS.BN.2.4.1	BN	2	4	1	6.33824	6.91176	4.92551	137.779	335.039	100.051	15.25	0.659406	d.108.1.1	N-acetyl transferase, NAT	0.0343348	Metabolism	Transferases	ABEV	high_disorder
DS.BN.2.4.5	BN	2	4	5	7.6	8.36	4.96228	127.303	332.049	104.626	17.96	0.435361	d.108.1.1	N-acetyl transferase, NAT	0.0343348	Metabolism	Transferases	ABEV	high_disorder
DS.HE.2.49.1	HE	2	49	1	9.71429	5.85714	8.778	126.501	84.0157	97.2687	17.5714	0.503345	d.108.1.1	N-acetyl transferase, NAT	0.0343348	Metabolism	Transferases	ABEV	high_disorder
DS.EH.8.11.1	EH	8	11	1	9.25	15.25	7.658	144.549	28.8012	94.051	32.5	0.263327	d.108.1.1	N-acetyl transferase, NAT	0.0343348	Metabolism	Transferases	ABEV	moderate_disorder
DS.EH.6.47.1	EH	6	47	1	3.5	8.75	14.5998	168.321	192.237	55.1935	18.25	0.565574	d.108.1.1	N-acetyl transferase, NAT	0.0343348	Metabolism	Transferases	ABEV	high_disorder
DS.GH.4.1.1	GH	4	1	1	3	14.5366	8.80265	73.862	57.7755	69.5795	21.5366	0.568807	d.108.1.1	N-acetyl transferase, NAT	0.0343348	Metabolism	Transferases	ABEV	high_disorder
DS.EH.3.5.2	EH	3	5	2	6.47059	9.64706	7.65265	141.33	165.615	76.8675	19.1176	0.451649	d.108.1.1	N-acetyl transferase, NAT	0.0343348	Metabolism	Transferases	ABEV	high_disorder
DS.EH.3.17.1	EH	3	17	1	6.60714	10.2143	7.70568	130.232	167.923	75.5714	19.8214	0.474975	d.108.1.1	N-acetyl transferase, NAT	0.0343348	Metabolism	Transferases	ABEV	high_disorder
DS.GH.0.1.127	GH	0	1	127	5.33333	9	2.59467	18.3577	318.893	33.826	14.3333	0.711111	a.118.8.1	Tetratricopeptide repeat (TPR)	0.0343348	General	Protein-protein interaction (dimerization domains)	ABEV	high_disorder
DS.EH.2.5.11	EH	2	5	11	6	10.75	7.68025	153.104	26.3223	84.0315	18.75	0.502284	c.2.1.2	Tyrosine-dependent oxidoreductases	0.0386266	General	Small molecule binding	ABEV	high_disorder
DS.BK.1.5.1	BK	1	5	1	6.22727	3	6.33995	75.5484	67.5748	27.5702	10.2273	0.590909	c.2.1.2	Tyrosine-dependent oxidoreductases	0.0386266	General	Small molecule binding	ABEV	high_disorder
DS.EH.4.4.1	EH	4	4	1	5.09804	12	9.28857	165.008	150.219	56.7398	21.098	0.325323	c.2.1.2	Tyrosine-dependent oxidoreductases	0.0386266	General	Small molecule binding	ABEV	high_disorder
DS.EH.5.3.1	EH	5	3	1	5.04167	13.75	11.3659	164.588	108.564	33.0951	23.7917	0.450656	c.2.1.2	Tyrosine-dependent oxidoreductases	0.0386266	General	Small molecule binding	ABEV	high_disorder
DS.EH.5.3.2	EH	5	3	2	4.4	13.2	11.097	160.487	141.468	32.9503	22.6	0.446369	c.2.1.2	Tyrosine-dependent oxidoreductases	0.0386266	General	Small molecule binding	ABEV	high_disorder
DS.EH.5.4.1	EH	5	4	1	4.81818	14	11.6185	163.361	30.2031	37.9412	23.8182	0.396029	c.2.1.2	Tyrosine-dependent oxidoreductases	0.0386266	General	Small molecule binding	ABEV	high_disorder
DS.EH.5.4.3	EH	5	4	3	4.5	13.1667	12.1638	165.332	83.0963	34.4602	22.6667	0.613829	c.2.1.2	Tyrosine-dependent oxidoreductases	0.0386266	General	Small molecule binding	ABEV	high_disorder
DS.EH.5.4.4	EH	5	4	4	5.16667	15	11.5237	167.473	83.4112	36.2375	25.1667	0.444957	c.2.1.2	Tyrosine-dependent oxidoreductases	0.0386266	General	Small molecule binding	ABEV	high_disorder
DS.EH.5.49.1	EH	5	49	1	7.66667	7.66667	13.7583	26.2207	201.107	67.6053	20.3333	0.233143	c.2.1.2	Tyrosine-dependent oxidoreductases	0.0386266	General	Small molecule binding	ABEV	moderate_disorder
DS.EH.5.5.1	EH	5	5	1	3.91667	11.9167	11.5455	167.449	167.992	47.9059	20.8333	0.342262	c.2.1.2	Tyrosine-dependent oxidoreductases	0.0386266	General	Small molecule binding	ABEV	high_disorder
DS.EH.5.5.2	EH	5	5	2	4.22222	11.8889	11.7936	168.1	185.308	51.0244	21.1111	0.452862	c.2.1.2	Tyrosine-dependent oxidoreductases	0.0386266	General	Small molecule binding	ABEV	high_disorder
DS.EH.5.83.1	EH	5	83	1	6	15	10.366	171.625	69.0588	48.3122	26	0.438547	c.2.1.2	Tyrosine-dependent oxidoreductases	0.0386266	General	Small molecule binding	ABEV	high_disorder
DS.EH.3.73.1	EH	3	73	1	6	4	10.4992	68.5052	105.521	38.153	13	0.169231	c.2.1.2	Tyrosine-dependent oxidoreductases	0.0386266	General	Small molecule binding	ABEV	moderate_disorder
DS.EH.4.28.1	EH	4	28	1	4.9	11.7	10.2331	159.72	154.572	54.7736	20.6	0.289454	c.2.1.2	Tyrosine-dependent oxidoreductases	0.0386266	General	Small molecule binding	ABEV	moderate_disorder
DS.EH.6.7.1	EH	6	7	1	7.2	19.2	12.6013	159.857	326.053	60.2654	32.4	0.310916	c.2.1.6	6-phosphogluconate dehydrogenase-like, N-terminal domain	0.0386266	General	Small molecule binding	ABEV	high_disorder
DS.HE.4.26.1	HE	4	26	1	13.0357	4.67857	6.68682	148.213	70.1507	96.2339	21.7143	0.394906	c.2.1.6	6-phosphogluconate dehydrogenase-like, N-terminal domain	0.0386266	General	Small molecule binding	ABEV	high_disorder
DS.BK.2.1.25	BK	2	1	25	2.6	3.2	9.5914	42.6308	62.251	37.6474	7.8	1	c.2.1.2	Tyrosine-dependent oxidoreductases	0.0386266	General	Small molecule binding	ABEV	high_disorder
DS.BK.5.36.1	BK	5	36	1	4.2	4	11.3098	109.644	58.5424	70.7772	13.2	0.866667	c.2.1.2	Tyrosine-dependent oxidoreductases	0.0386266	General	Small molecule binding	ABEV	high_disorder
DS.EG.2.22.1	EG	2	22	1	5.75	3.125	9.83463	99.0664	8.34463	35.9325	10.875	1	c.2.1.2	Tyrosine-dependent oxidoreductases	0.0386266	General	Small molecule binding	ABEV	high_disorder
DS.EG.2.22.4	EG	2	22	4	5	4	9.596	80.9777	32.5237	33.7337	11	1	c.2.1.2	Tyrosine-dependent oxidoreductases	0.0386266	General	Small molecule binding	ABEV	high_disorder
DS.EG.2.27.2	EG	2	27	2	6.5	3	9.93317	105.074	2.964	36.3545	11.5	0.922222	c.2.1.2	Tyrosine-dependent oxidoreductases	0.0386266	General	Small molecule binding	ABEV	high_disorder
DS.EG.2.56.1	EG	2	56	1	6.5	3	10.0448	101.535	2.60625	34.8055	11.5	1	c.2.1.2	Tyrosine-dependent oxidoreductases	0.0386266	General	Small molecule binding	ABEV	high_disorder
DS.EG.2.7.5	EG	2	7	5	5.57143	3	10.1369	97.0494	352.12	38.1674	10.5714	1	c.2.1.2	Tyrosine-dependent oxidoreductases	0.0386266	General	Small molecule binding	ABEV	high_disorder
DS.EG.3.21.1	EG	3	21	1	4.16667	3	7.33317	122.775	126.044	67.4887	10.1667	1	c.2.1.2	Tyrosine-dependent oxidoreductases	0.0386266	General	Small molecule binding	ABEV	high_disorder
DS.EG.3.24.1	EG	3	24	1	4	3	7.2255	119.266	143.62	70.1928	10	1	c.2.1.2	Tyrosine-dependent oxidoreductases	0.0386266	General	Small molecule binding	ABEV	high_disorder
DS.EH.2.1.8	EH	2	1	8	6.17391	12.9348	8.34654	158.339	28.9397	68.823	21.1087	0.542573	c.2.1.2	Tyrosine-dependent oxidoreductases	0.0386266	General	Small molecule binding	ABEV	high_disorder
DS.EG.3.71.1	EG	3	71	1	4	3	7.61267	109.419	129.864	59.6823	10	1	c.2.1.2	Tyrosine-dependent oxidoreductases	0.0386266	General	Small molecule binding	ABEV	high_disorder
DS.EG.9.1.1	EG	9	1	1	4.22222	3	27.3083	64.359	339.596	21.8721	16.2222	0.459105	c.2.1.2	Tyrosine-dependent oxidoreductases	0.0386266	General	Small molecule binding	ABEV	high_disorder
DS.EH.12.7.1	EH	12	7	1	5.33333	21	16.326	159.791	204.046	31.985	38.3333	0.235043	c.2.1.2	Tyrosine-dependent oxidoreductases	0.0386266	General	Small molecule binding	ABEV	moderate_disorder
DS.EH.14.1.1	EH	14	1	1	4.16667	15.0833	24.5786	154.142	258.669	31.2875	33.25	0.276976	c.2.1.2	Tyrosine-dependent oxidoreductases	0.0386266	General	Small molecule binding	ABEV	moderate_disorder
DS.EH.2.1.20	EH	2	1	20	6.04	11.84	8.23672	154.762	8.54396	75.3708	19.88	0.537677	c.2.1.2	Tyrosine-dependent oxidoreductases	0.0386266	General	Small molecule binding	ABEV	high_disorder
DS.EH.2.20.1	EH	2	20	1	6.25	15.5	8.84238	144.072	14.9381	57.6946	23.75	0.400795	c.2.1.6	6-phosphogluconate dehydrogenase-like, N-terminal domain	0.0386266	General	Small molecule binding	ABEV	high_disorder
DS.EH.3.3.8	EH	3	3	8	5	12.6667	9.582	168.902	154.898	73.854	20.6667	0.260317	c.2.1.6	6-phosphogluconate dehydrogenase-like, N-terminal domain	0.0386266	General	Small molecule binding	ABEV	moderate_disorder
DS.EH.5.19.1	EH	5	19	1	3.91667	12.0833	12.9468	162.959	326.352	67.1171	21	0.626093	c.2.1.6	6-phosphogluconate dehydrogenase-like, N-terminal domain	0.0386266	General	Small molecule binding	ABEV	high_disorder
DS.GH.0.1.28	GH	0	1	28	3.75862	11.0345	3.18748	51.4755	11.0333	52.8735	14.7931	0.623431	c.2.1.6	6-phosphogluconate dehydrogenase-like, N-terminal domain	0.0386266	General	Small molecule binding	ABEV	high_disorder
DS.HE.2.59.1	HE	2	59	1	12	4.6	5.3424	129.807	79.7074	35.6474	18.6	0.565325	c.2.1.6	6-phosphogluconate dehydrogenase-like, N-terminal domain	0.0386266	General	Small molecule binding	ABEV	high_disorder
DS.EH.6.107.1	EH	6	107	1	4	6	18.9717	79.3227	54.338	12.2283	16	0.791667	c.2.1.2	Tyrosine-dependent oxidoreductases	0.0386266	General	Small molecule binding	ABEV	high_disorder
DS.GE.1.6.1	GE	1	6	1	3.11111	7.28889	5.88544	143.51	64.8782	117.039	11.4	0.909669	c.2.1.2	Tyrosine-dependent oxidoreductases	0.0386266	General	Small molecule binding	ABEV	high_disorder
DS.EH.5.49.2	EH	5	49	2	7.33333	5	14.53	48.148	206.312	69.6547	17.3333	0.759259	c.2.1.2	Tyrosine-dependent oxidoreductases	0.0386266	General	Small molecule binding	ABEV	high_disorder
DS.GE.6.1.1	GE	6	1	1	3	4	12.7682	93.121	19.7484	41.2177	13	0.880342	c.2.1.2	Tyrosine-dependent oxidoreductases	0.0386266	General	Small molecule binding	ABEV	high_disorder
DS.GE.1.6.2	GE	1	6	2	3.09524	7.61905	6.13276	145.902	58.5465	119.975	11.7143	0.945933	c.2.1.2	Tyrosine-dependent oxidoreductases	0.0386266	General	Small molecule binding	ABEV	high_disorder
DS.HG.1.3.1	HG	1	3	1	11.3333	3	6.25652	98.1592	206.253	53.2863	15.3333	0.693803	c.2.1.2	Tyrosine-dependent oxidoreductases	0.0386266	General	Small molecule binding	ABEV	high_disorder
DS.HG.0.1.6	HG	0	1	6	14.7766	3.07447	3.1331	40.5628	349.483	63.0234	17.8511	0.619184	c.2.1.2	Tyrosine-dependent oxidoreductases	0.0386266	General	Small molecule binding	ABEV	high_disorder
DS.HG.0.1.20	HG	0	1	20	12.1081	3	3.53951	38.7707	352.285	78.5291	15.1081	0.712213	c.2.1.2	Tyrosine-dependent oxidoreductases	0.0386266	General	Small molecule binding	ABEV	high_disorder
DS.HE.7.26.1	HE	7	26	1	12.75	4.25	12.6135	158.222	302.948	119.593	24	0.145145	c.2.1.2	Tyrosine-dependent oxidoreductases	0.0386266	General	Small molecule binding	ABEV	moderate_disorder
DS.HE.4.17.1	HE	4	17	1	7.45455	4.09091	9.29973	122.402	24.663	54.3668	15.5455	0.50527	c.2.1.2	Tyrosine-dependent oxidoreductases	0.0386266	General	Small molecule binding	ABEV	high_disorder
DS.HE.4.145.1	HE	4	145	1	15	4.2	13.6836	132.199	10.354	115.863	23.2	0.371377	c.2.1.2	Tyrosine-dependent oxidoreductases	0.0386266	General	Small molecule binding	ABEV	high_disorder
DS.HE.4.244.1	HE	4	244	1	15	4	13.738	141.343	17.923	111.973	23	0.173913	c.2.1.2	Tyrosine-dependent oxidoreductases	0.0386266	General	Small molecule binding	ABEV	moderate_disorder
DS.HE.3.41.1	HE	3	41	1	13.5	5.5	9.68083	165.689	164.452	110.448	22	0.40961	c.2.1.2	Tyrosine-dependent oxidoreductases	0.0386266	General	Small molecule binding	ABEV	high_disorder
DS.HE.2.16.3	HE	2	16	3	18.6	5.2	8.83	163.686	145.365	129.291	25.8	0.30447	c.2.1.2	Tyrosine-dependent oxidoreductases	0.0386266	General	Small molecule binding	ABEV	high_disorder
DS.GH.7.2.1	GH	7	2	1	3	21.8333	10.4893	81.329	244.473	79.7515	31.8333	0.26369	c.2.1.2	Tyrosine-dependent oxidoreductases	0.0386266	General	Small molecule binding	ABEV	moderate_disorder
DS.GH.7.1.1	GH	7	1	1	3	20.8696	10.4289	81.5649	247.758	79.3518	30.8696	0.270394	c.2.1.2	Tyrosine-dependent oxidoreductases	0.0386266	General	Small molecule binding	ABEV	moderate_disorder
DS.GE.6.1.4	GE	6	1	4	3	3.75	12.267	98.6737	27.9258	34.5162	12.75	1	c.2.1.2	Tyrosine-dependent oxidoreductases	0.0386266	General	Small molecule binding	ABEV	high_disorder
DS.GE.6.1.2	GE	6	1	2	3	3.9375	12.5317	87.3937	18.6426	39.9188	12.9375	0.899038	c.2.1.2	Tyrosine-dependent oxidoreductases	0.0386266	General	Small molecule binding	ABEV	high_disorder
DS.HE.3.5.11	HE	3	5	11	14.6667	5	10.7899	166.726	10.2161	139.667	22.6667	0.605611	c.2.1.2	Tyrosine-dependent oxidoreductases	0.0386266	General	Small molecule binding	ABEV	high_disorder
DS.HG.1.1.2	HG	1	1	2	7.90909	3	4.299	69.5275	31.8245	56.0998	11.9091	0.842652	a.30.2.1	Homodimeric domain of signal transducing histidine kinase	0.0386266	Regulation	Signal transduction	ABEV	high_disorder
DS.EH.3.18.3	EH	3	18	3	4.5	11	12.3778	145.358	56.5243	36.94	18.5	0.517332	c.94.1.1	Phosphate binding protein-like	0.0429185	Intracellular_processes	Inorganic ion transport and metabolism	ABEV	high_disorder
DS.HE.5.1.15	HE	5	1	15	8.83333	4.33333	7.60283	155.763	189.521	104.937	18.1667	0.487817	c.94.1.1	Phosphate binding protein-like	0.0429185	Intracellular_processes	Inorganic ion transport and metabolism	ABEV	high_disorder
DS.HE.4.6.5	HE	4	6	5	12.3636	4.45455	10.6083	155.155	86.5679	115.57	20.8182	0.478009	c.94.1.1	Phosphate binding protein-like	0.0429185	Intracellular_processes	Inorganic ion transport and metabolism	ABEV	high_disorder
DS.HE.3.96.1	HE	3	96	1	11.6667	5.33333	7.61367	158.338	161.717	100.019	20	0.448514	c.94.1.1	Phosphate binding protein-like	0.0429185	Intracellular_processes	Inorganic ion transport and metabolism	ABEV	high_disorder
DS.HE.3.54.3	HE	3	54	3	15.6667	7	8.27933	166.556	101.947	98.5327	25.6667	0.334055	c.94.1.1	Phosphate binding protein-like	0.0429185	Intracellular_processes	Inorganic ion transport and metabolism	ABEV	high_disorder
DS.GE.3.5.2	GE	3	5	2	3	3.57143	7.48343	74.0126	72.751	49.1561	9.57143	1	c.94.1.1	Phosphate binding protein-like	0.0429185	Intracellular_processes	Inorganic ion transport and metabolism	ABEV	high_disorder
DS.GE.3.2.1	GE	3	2	1	4	4	8.19483	101.34	99.0957	39.988	11	1	c.94.1.1	Phosphate binding protein-like	0.0429185	Intracellular_processes	Inorganic ion transport and metabolism	ABEV	high_disorder
DS.EH.1.2.40	EH	1	2	40	3	12.8	6.6924	74.0444	9.1738	23.5922	16.8	0.459231	d.122.1.3	Histidine kinase	0.0429185	Intracellular_processes	Posttranslational modification, protein turnover, chaperones	ABEV	high_disorder
DS.EH.2.37.1	EH	2	37	1	5.33333	9.33333	9.00017	130.768	26.7177	49.76	16.6667	0.582244	c.94.1.1	Phosphate binding protein-like	0.0429185	Intracellular_processes	Inorganic ion transport and metabolism	ABEV	high_disorder
DS.EH.2.2.4	EH	2	2	4	4.2973	8.2973	9.5947	124.873	35.6619	36.3053	14.5946	0.83348	c.94.1.1	Phosphate binding protein-like	0.0429185	Intracellular_processes	Inorganic ion transport and metabolism	ABEV	high_disorder
DS.EH.13.1.1	EH	13	1	1	6	12.2	9.3966	124.242	24.3276	95.5948	31.2	0.302815	c.94.1.1	Phosphate binding protein-like	0.0429185	Intracellular_processes	Inorganic ion transport and metabolism	ABEV	high_disorder
DS.EH.0.1.7	EH	0	1	7	5.02632	9.82456	3.15779	98.301	107.747	15.9955	14.8509	0.555834	c.94.1.1	Phosphate binding protein-like	0.0429185	Intracellular_processes	Inorganic ion transport and metabolism	ABEV	high_disorder
DS.EH.0.1.44	EH	0	1	44	5.14286	8	2.75157	68.4594	99.8089	8.08893	13.1429	0.655685	c.94.1.1	Phosphate binding protein-like	0.0429185	Intracellular_processes	Inorganic ion transport and metabolism	ABEV	high_disorder
DS.HE.5.1.4	HE	5	1	4	10	4.33333	8.3784	157.551	190.013	106.829	19.3333	0.572736	c.94.1.1	Phosphate binding protein-like	0.0429185	Intracellular_processes	Inorganic ion transport and metabolism	ABEV	high_disorder
DS.HE.3.8.1	HE	3	8	1	12.1148	5.11475	7.54736	144.422	99.2387	108.973	20.2295	0.426381	d.122.1.3	Histidine kinase	0.0429185	Intracellular_processes	Posttranslational modification, protein turnover, chaperones	ABEV	high_disorder
DS.HE.3.10.2	HE	3	10	2	11.9412	4.17647	7.45524	129.443	126.275	95.0513	19.1176	0.443006	c.3.1.2	FAD-linked reductases, N-terminal domain	0.0429185	General	Small molecule binding	ABEV	high_disorder
DS.EH.3.158.1	EH	3	158	1	5	6.33333	7.245	105.456	107.249	70.4707	14.3333	0.809524	c.94.1.1	Phosphate binding protein-like	0.0429185	Intracellular_processes	Inorganic ion transport and metabolism	ABEV	high_disorder
DS.HE.6.112.1	HE	6	112	1	9	3.33333	11.342	158.002	216.58	101.747	18.3333	0.578947	c.94.1.1	Phosphate binding protein-like	0.0429185	Intracellular_processes	Inorganic ion transport and metabolism	ABEV	high_disorder
DS.HE.5.1.1	HE	5	1	1	7.63333	3.93333	8.6847	151.322	146.631	104.292	16.5667	0.623851	c.94.1.1	Phosphate binding protein-like	0.0429185	Intracellular_processes	Inorganic ion transport and metabolism	ABEV	high_disorder
DS.HE.4.51.3	HE	4	51	3	10.75	5.5	12.403	169.8	297.23	110.771	20.25	0.446272	c.23.1.1	CheY-related	0.0429185	Regulation	Signal transduction	ABEV	high_disorder
DS.EH.2.1.30	EH	2	1	30	5.125	9.5625	8.45994	160.483	36.0122	55.335	16.6875	0.711007	c.23.1.1	CheY-related	0.0429185	Regulation	Signal transduction	ABEV	high_disorder
DS.EH.3.2.2	EH	3	2	2	4.83333	12.3125	10.4142	162.281	11.7058	55.8504	20.1458	0.388733	c.23.1.1	CheY-related	0.0429185	Regulation	Signal transduction	ABEV	high_disorder
DS.EH.3.2.3	EH	3	2	3	5.07692	11.0769	10.5998	163.468	347.683	61.1265	19.1538	0.522204	c.23.1.1	CheY-related	0.0429185	Regulation	Signal transduction	ABEV	high_disorder
DS.EH.7.30.1	EH	7	30	1	5.75	11.25	6.4955	129.055	87.0332	59.8675	24	0.504783	c.23.1.1	CheY-related	0.0429185	Regulation	Signal transduction	ABEV	high_disorder
DS.HE.3.5.4	HE	3	5	4	14.0667	4.3	11.0882	159.27	33.857	130.629	21.3667	0.382579	c.2.1.3	Glyceraldehyde-3-phosphate dehydrogenase-like, N-terminal domain	0.0429185	General	Small molecule binding	ABEV	high_disorder
DS.HE.4.7.3	HE	4	7	3	10.5806	5.22581	6.968	158.176	76.8695	79.6855	19.8065	0.53618	c.23.1.1	CheY-related	0.0429185	Regulation	Signal transduction	ABEV	high_disorder
DS.HE.4.143.1	HE	4	143	1	18.2	5	11.4356	145.714	346.597	97.9564	27.2	0.375818	c.2.1.3	Glyceraldehyde-3-phosphate dehydrogenase-like, N-terminal domain	0.0429185	General	Small molecule binding	ABEV	high_disorder
DS.EH.4.2.2	EH	4	2	2	4.95	11.5	9.35795	160.838	128.079	56.3106	20.45	0.309093	c.2.1.3	Glyceraldehyde-3-phosphate dehydrogenase-like, N-terminal domain	0.0429185	General	Small molecule binding	ABEV	high_disorder
DS.EH.2.1.12	EH	2	1	12	5.2973	8.91892	7.53754	145.353	67.0016	40.5744	16.2162	0.598541	c.23.1.1	CheY-related	0.0429185	Regulation	Signal transduction	ABEV	high_disorder
DS.HE.1.1.1	HE	1	1	1	12.6667	5.17647	6.40678	142.932	63.1962	111.163	18.8431	0.477048	c.95.1.1	Thiolase-related	0.0472103	Metabolism	Other enzymes	ABE	high_disorder
DS.GH.4.12.1	GH	4	12	1	3	14.2	11.7386	78.313	52.6906	80.839	21.2	0.581778	c.95.1.1	Thiolase-related	0.0472103	Metabolism	Other enzymes	ABE	high_disorder
DS.GE.2.2.1	GE	2	2	1	3.14286	4.42857	8.5576	114.629	67.4635	82.7998	9.57143	0.918367	c.95.1.1	Thiolase-related	0.0472103	Metabolism	Other enzymes	ABE	high_disorder
DS.EH.2.12.5	EH	2	12	5	4.6	5.6	9.0672	47.3728	155.671	16.1808	12.2	0.875	c.95.1.1	Thiolase-related	0.0472103	Metabolism	Other enzymes	ABE	high_disorder
DS.GE.3.4.2	GE	3	4	2	3	4.28571	10.6461	38.4653	27.3689	67.2689	10.2857	1	e.23.1.1	Acetyl-CoA synthetase-like	0.0472103	Metabolism	Other enzymes	ABE	high_disorder
DS.HE.7.2.1	HE	7	2	1	17	4.83333	12.2025	125.675	8.61117	92.6792	28.8333	0.260057	e.23.1.1	Acetyl-CoA synthetase-like	0.0472103	Metabolism	Other enzymes	ABE	moderate_disorder
DS.EH.1.22.2	EH	1	22	2	3.25	10.75	5.57575	152.367	105.099	60.055	15	0.459704	c.95.1.1	Thiolase-related	0.0472103	Metabolism	Other enzymes	ABE	high_disorder
DS.HE.5.95.1	HE	5	95	1	10	2.75	13.103	143.564	293.978	144.727	17.75	0.436447	c.95.1.1	Thiolase-related	0.0472103	Metabolism	Other enzymes	ABE	high_disorder
DS.BK.4.90.1	BK	4	90	1	2	8	13.2085	139.682	76.3615	58.463	14	0.857143	c.95.1.1	Thiolase-related	0.0472103	Metabolism	Other enzymes	ABE	high_disorder
DS.HG.3.15.1	HG	3	15	1	4	3	12.5029	68.2442	352.458	94.5607	10	1	c.95.1.1	Thiolase-related	0.0472103	Metabolism	Other enzymes	ABE	high_disorder
DS.HE.2.3.2	HE	2	3	2	12.8958	4.80208	5.20446	141.144	120.55	83.6252	19.6979	0.46438	c.67.1.4	GABA-aminotransferase-like	0.0515021	Metabolism	Transferases	ABEV	high_disorder
DS.GH.4.11.1	GH	4	11	1	3	10.4	15.7414	139.234	142.121	108.552	17.4	0.473856	c.67.1.4	GABA-aminotransferase-like	0.0515021	Metabolism	Transferases	ABEV	high_disorder
DS.EH.4.41.1	EH	4	41	1	4.375	10.5	8.64612	160.186	32.206	52.188	18.875	0.663434	c.67.1.4	GABA-aminotransferase-like	0.0515021	Metabolism	Transferases	ABEV	high_disorder
DS.BN.9.10.1	BN	9	10	1	5	5	4.756	157.9	347.161	96.9193	19	0.118421	c.67.1.4	GABA-aminotransferase-like	0.0515021	Metabolism	Transferases	ABEV	moderate_disorder
DS.BN.12.2.1	BN	12	2	1	4.85714	4.85714	4.66543	163.33	350.024	98.7836	21.7143	0.349103	c.67.1.4	GABA-aminotransferase-like	0.0515021	Metabolism	Transferases	ABEV	high_disorder
DS.BK.7.8.1	BK	7	8	1	4.5	2	12.4602	140.722	53.6177	80.6678	13.5	0.619048	c.67.1.4	GABA-aminotransferase-like	0.0515021	Metabolism	Transferases	ABEV	high_disorder
DS.HH.2.8.1	HH	2	8	1	14.3214	14.7857	6.27871	59.3556	67.5044	78.892	31.1071	0.23906	c.67.1.4	GABA-aminotransferase-like	0.0515021	Metabolism	Transferases	ABEV	moderate_disorder
DS.HG.2.6.6	HG	2	6	6	10.6667	3	7.34967	96.7097	40.6327	117.067	15.6667	0.729167	c.87.1.8	Glycosyl transferases group 1	0.055794	Metabolism	Polysaccharide metabolism	ABEV	high_disorder
DS.EH.5.74.1	EH	5	74	1	6	10	8.91175	167.379	57.8338	94.614	21	0.142857	c.23.16.1	Class I glutamine amidotransferases (GAT)	0.055794	Metabolism	Transferases	ABEV	moderate_disorder
DS.EH.4.50.1	EH	4	50	1	7.28571	13.2857	9.163	127.478	183.91	58.1729	24.5714	0.2333	c.47.1.10	Glutathione peroxidase-like	0.055794	Metabolism	Oxidation/Reduction	ABEV	moderate_disorder
DS.EH.8.25.1	EH	8	25	1	4	8.33333	9.439	165.151	172.726	91.8003	20.3333	0.115079	c.87.1.8	Glycosyl transferases group 1	0.055794	Metabolism	Polysaccharide metabolism	ABEV	moderate_disorder
DS.EH.11.6.1	EH	11	6	1	4	10	13.4997	166.931	257.327	82.209	25	0.348547	c.23.16.1	Class I glutamine amidotransferases (GAT)	0.055794	Metabolism	Transferases	ABEV	high_disorder
DS.BN.4.58.2	BN	4	58	2	6.66667	5.66667	5.75033	159.777	282.525	111.956	16.3333	0.617063	c.23.16.1	Class I glutamine amidotransferases (GAT)	0.055794	Metabolism	Transferases	ABEV	high_disorder
DS.HE.4.24.3	HE	4	24	3	14	5.8	8.7358	159.798	104.532	95.1486	23.8	0.465185	c.47.1.10	Glutathione peroxidase-like	0.055794	Metabolism	Oxidation/Reduction	ABEV	high_disorder
DS.HE.4.82.3	HE	4	82	3	11.3333	4.66667	11.3353	155.735	344.973	83.0987	20	0.286284	c.68.1.1	Spore coat polysaccharide biosynthesis protein SpsA	0.055794	Metabolism	Transferases	ABEV	moderate_disorder
DS.EH.0.2.1	EH	0	2	1	4.16667	12.6111	3.31911	66.1887	172.53	31.6945	16.7778	0.304734	d.37.1.1	CBS-domain pair	0.0600858	Intracellular_processes	Transport	ABE	high_disorder
DS.EH.4.3.1	EH	4	3	1	2.90909	10.5455	10.5083	167.849	233.919	84.2313	17.4545	0.627009	d.37.1.1	CBS-domain pair	0.0600858	Intracellular_processes	Transport	ABE	high_disorder
DS.EH.4.3.10	EH	4	3	10	2	11	10.4773	168.739	217.325	85.089	17	0.529412	d.37.1.1	CBS-domain pair	0.0600858	Intracellular_processes	Transport	ABE	high_disorder
DS.EH.4.3.2	EH	4	3	2	4.09091	10.9091	10.6573	162.732	248.753	93.2928	19	0.669734	d.37.1.1	CBS-domain pair	0.0600858	Intracellular_processes	Transport	ABE	high_disorder
DS.EH.5.1.1	EH	5	1	1	5.71429	12.8095	11.4607	158.243	333.432	72.795	23.5238	0.600495	d.37.1.1	CBS-domain pair	0.0600858	Intracellular_processes	Transport	ABE	high_disorder
DS.GE.2.55.1	GE	2	55	1	3	2	7.27175	84.0625	146.49	86.5088	7	1	d.37.1.1	CBS-domain pair	0.0600858	Intracellular_processes	Transport	ABE	high_disorder
DS.HE.4.21.7	HE	4	21	7	8.66667	4.66667	9.92567	125.359	12.1113	117.914	17.3333	0.322055	d.37.1.1	CBS-domain pair	0.0600858	Intracellular_processes	Transport	ABE	high_disorder
DS.HE.1.12.2	HE	1	12	2	6.14286	2.57143	6.30814	99.5001	115.213	83.7761	9.71429	0.878571	d.37.1.1	CBS-domain pair	0.0600858	Intracellular_processes	Transport	ABE	high_disorder
DS.EH.4.82.1	EH	4	82	1	8	10	14.5518	125.772	72.4675	20.4105	22	0.738636	d.104.1.1	Class II aminoacyl-tRNA synthetase (aaRS)-like, catalytic domain	0.0686695	Metabolism	Coenzyme metabolism	ABEV	high_disorder
DS.EH.4.22.2	EH	4	22	2	2.25	10.75	10.8785	104.997	125.099	51.0845	17	0.404605	d.104.1.1	Class II aminoacyl-tRNA synthetase (aaRS)-like, catalytic domain	0.0686695	Metabolism	Coenzyme metabolism	ABEV	high_disorder
DS.GH.1.2.2	GH	1	2	2	3	10.5	5.35339	100.679	74.8321	81.2772	14.5	0.723393	c.26.1.1	Class I aminoacyl-tRNA synthetases (RS), catalytic domain	0.0686695	Metabolism	Nucleotide transport and metabolism	ABEV	high_disorder
DS.BK.1.4.9	BK	1	4	9	3.4	3.4	5.6644	36.7766	151.872	13.1914	7.8	0.9125	c.26.1.1	Class I aminoacyl-tRNA synthetases (RS), catalytic domain	0.0686695	Metabolism	Nucleotide transport and metabolism	ABEV	high_disorder
DS.EG.3.20.2	EG	3	20	2	4.66667	3	11.7387	122.161	79.8977	28.9233	10.6667	0.333333	d.104.1.1	Class II aminoacyl-tRNA synthetase (aaRS)-like, catalytic domain	0.0686695	Metabolism	Coenzyme metabolism	ABEV	high_disorder
DS.EH.0.1.15	EH	0	1	15	4.85185	8.92593	3.30122	65.3223	234.325	11.9141	13.7778	0.56415	d.104.1.1	Class II aminoacyl-tRNA synthetase (aaRS)-like, catalytic domain	0.0686695	Metabolism	Coenzyme metabolism	ABEV	high_disorder
DS.HH.3.6.1	HH	3	6	1	11.1333	12.6333	8.6407	126.883	111.448	36.1401	26.7667	0.428247	d.104.1.1	Class II aminoacyl-tRNA synthetase (aaRS)-like, catalytic domain	0.0686695	Metabolism	Coenzyme metabolism	ABEV	high_disorder
DS.HH.3.33.1	HH	3	33	1	12.4	15	8.6716	123.233	124.203	50.9758	30.4	0.388515	d.104.1.1	Class II aminoacyl-tRNA synthetase (aaRS)-like, catalytic domain	0.0686695	Metabolism	Coenzyme metabolism	ABEV	high_disorder
DS.HG.5.6.1	HG	5	6	1	8	4	11.019	92.7735	335.92	126.419	17	0.264706	d.104.1.1	Class II aminoacyl-tRNA synthetase (aaRS)-like, catalytic domain	0.0686695	Metabolism	Coenzyme metabolism	ABEV	moderate_disorder
DS.BK.3.122.1	BK	3	122	1	6.75	4.75	7.48275	129.437	120.41	50.1878	14.5	0.5625	b.43.3.1	Elongation factors	0.0729614	Information	Translation, ribosomes, ribosome biogenesis; tRNA metabolism	ABEV	high_disorder
DS.BN.7.74.1	BN	7	74	1	6.33333	3.66667	9.616	151.234	210.041	161.444	17	0.470588	c.55.1.1	Actin/HSP70	0.0772532	Metabolism	Other enzymes	ABEV	high_disorder
DS.HG.0.1.54	HG	0	1	54	5.42857	3.78571	3.0915	29.0979	35.8768	79.8952	9.21429	1	d.58.11.1	EF-G/eEF-2 domains III and V	0.0772532	Information	Translation, ribosomes, ribosome biogenesis; tRNA metabolism	ABE	high_disorder
DS.HE.4.19.1	HE	4	19	1	11.75	4.33333	9.65992	150.104	83.2258	113.51	20.0833	0.410067	d.58.11.1	EF-G/eEF-2 domains III and V	0.0772532	Information	Translation, ribosomes, ribosome biogenesis; tRNA metabolism	ABE	high_disorder
DS.GH.3.44.1	GH	3	44	1	4	10	6.83733	74.4227	75.197	34.6017	17	0.947368	c.55.1.1	Actin/HSP70	0.0772532	Metabolism	Other enzymes	ABEV	high_disorder
DS.BK.2.32.2	BK	2	32	2	4.5	3.25	10.2067	60.1557	121.174	30.894	9.75	0.75	d.58.11.1	EF-G/eEF-2 domains III and V	0.0772532	Information	Translation, ribosomes, ribosome biogenesis; tRNA metabolism	ABE	high_disorder
DS.EH.2.13.4	EH	2	13	4	5.55556	10.7778	9.73678	95.7421	20.6898	16.4804	18.3333	0.460411	c.37.1.1	Nucleotide and nucleoside kinases	0.0772532	General	Small molecule binding	ABEV	high_disorder
DS.EH.5.72.1	EH	5	72	1	4.25	11.75	14.4688	167.246	15.6395	64.6252	21	0.639825	c.37.1.1	Nucleotide and nucleoside kinases	0.0772532	General	Small molecule binding	ABEV	high_disorder
DS.EH.6.30.1	EH	6	30	1	4.83333	10.8333	8.67817	156.294	52.1868	81.9678	21.6667	0.491244	c.37.1.1	Nucleotide and nucleoside kinases	0.0772532	General	Small molecule binding	ABEV	high_disorder
DS.GG.1.3.10	GG	1	3	10	3	5	5.73133	103.258	168.046	101	9	0.666667	c.37.1.1	Nucleotide and nucleoside kinases	0.0772532	General	Small molecule binding	ABEV	high_disorder
DS.HH.1.1.18	HH	1	1	18	4.09375	10.2812	4.29622	54.9141	82.8898	103.513	15.375	0.443577	c.37.1.1	Nucleotide and nucleoside kinases	0.0772532	General	Small molecule binding	ABEV	high_disorder
DS.EH.4.23.2	EH	4	23	2	5	17.6667	10.3487	177.881	302.857	54.7833	26.6667	0.354875	c.37.1.1	Nucleotide and nucleoside kinases	0.0772532	General	Small molecule binding	ABEV	high_disorder
DS.EH.3.94.1	EH	3	94	1	4	10.75	9.70675	125.773	34.4175	61.8387	17.75	0.326797	c.55.3.5	DnaQ-like 3'-5' exonuclease	0.0815451	Metabolism	Nucleotide transport and metabolism	ABEV	high_disorder
DS.EH.6.36.1	EH	6	36	1	4	11.2	8.5938	103.312	61.475	83.8158	21.2	0.187489	c.55.3.5	DnaQ-like 3'-5' exonuclease	0.0815451	Metabolism	Nucleotide transport and metabolism	ABEV	moderate_disorder
DS.HE.4.13.2	HE	4	13	2	14.4	5.9	8.9554	159.213	149.214	98.3726	24.3	0.453021	c.47.1.1	Thioltransferase	0.0815451	Metabolism	Oxidation/Reduction	ABEV	high_disorder
DS.HE.4.13.8	HE	4	13	8	7.33333	4.66667	8.63733	146.358	115.899	100.104	16	0.642857	c.47.1.1	Thioltransferase	0.0815451	Metabolism	Oxidation/Reduction	ABEV	high_disorder
DS.HE.5.149.1	HE	5	149	1	8.66667	5.33333	11.109	109.016	78.9313	29.9983	19	0.643519	c.47.1.1	Thioltransferase	0.0815451	Metabolism	Oxidation/Reduction	ABEV	high_disorder
DS.HH.4.20.4	HH	4	20	4	10.3333	7	8.97567	101.933	103.919	39.1507	21.3333	0.667291	c.47.1.1	Thioltransferase	0.0815451	Metabolism	Oxidation/Reduction	ABEV	high_disorder
DS.HH.2.7.10	HH	2	7	10	8	7.25	8.83	94.0222	48.0662	82.9098	17.25	0.204113	c.84.1.1	Phosphoglucomutase, first 3 domains	0.0858369	Metabolism	Carbohydrate transport and metabolism	ABEV	moderate_disorder
DS.HE.3.5.5	HE	3	5	5	13	5.16667	11.4428	167.761	56.1223	129.431	21.1667	0.351711	c.61.1.1	Phosphoribosyltransferases (PRTases)	0.0901288	Metabolism	Nucleotide transport and metabolism	ABEV	high_disorder
DS.EH.4.29.3	EH	4	29	3	5	13	10.2217	147.548	169.018	47.946	22	0.393651	c.26.2.1	N-type ATP pyrophosphatases	0.0901288	Metabolism	Nucleotide transport and metabolism	ABEV	high_disorder
DS.BK.2.5.2	BK	2	5	2	3.9375	3.75	8.54913	70.9864	70.039	19.6569	9.6875	0.879464	c.61.1.1	Phosphoribosyltransferases (PRTases)	0.0901288	Metabolism	Nucleotide transport and metabolism	ABEV	high_disorder
DS.BK.2.7.7	BK	2	7	7	4.75	2	8.33275	83.481	40.9892	30.0918	8.75	1	c.61.1.1	Phosphoribosyltransferases (PRTases)	0.0901288	Metabolism	Nucleotide transport and metabolism	ABEV	high_disorder
DS.BN.15.1.1	BN	15	1	1	2	3.75	5.471	143.04	332.499	71.6697	20.75	0.192857	c.61.1.1	Phosphoribosyltransferases (PRTases)	0.0901288	Metabolism	Nucleotide transport and metabolism	ABEV	moderate_disorder
DS.EG.1.2.1	EG	1	2	1	5.425	3.1	6.5087	62.3331	327.827	22.5578	9.525	0.853571	c.61.1.1	Phosphoribosyltransferases (PRTases)	0.0901288	Metabolism	Nucleotide transport and metabolism	ABEV	high_disorder
DS.HH.5.17.1	HH	5	17	1	17.5556	19.7778	10.6276	148.679	201.972	70.4207	42.3333	0.402358	c.61.1.1	Phosphoribosyltransferases (PRTases)	0.0901288	Metabolism	Nucleotide transport and metabolism	ABEV	high_disorder
DS.HH.2.1.39	HH	2	1	39	10.8	14.6	6.2488	16.1774	262.725	21.752	27.4	0.369799	a.27.1.1	Anticodon-binding domain of a subclass of class I aminoacyl-tRNA synthetases	0.0901288	Information	Translation, ribosomes, ribosome biogenesis; tRNA metabolism	ABEV	high_disorder
DS.HH.3.6.22	HH	3	6	22	25	20	7.394	168.904	124.597	70.4287	48	0.279238	a.27.1.1	Anticodon-binding domain of a subclass of class I aminoacyl-tRNA synthetases	0.0901288	Information	Translation, ribosomes, ribosome biogenesis; tRNA metabolism	ABEV	moderate_disorder
DS.HH.4.8.11	HH	4	8	11	18	11	9.59067	167.095	190.437	73.7143	33	0.252116	a.27.1.1	Anticodon-binding domain of a subclass of class I aminoacyl-tRNA synthetases	0.0901288	Information	Translation, ribosomes, ribosome biogenesis; tRNA metabolism	ABEV	moderate_disorder
DS.HH.4.8.7	HH	4	8	7	19.6	11.2	9.5138	166.433	169.789	71.8608	34.8	0.183175	a.27.1.1	Anticodon-binding domain of a subclass of class I aminoacyl-tRNA synthetases	0.0901288	Information	Translation, ribosomes, ribosome biogenesis; tRNA metabolism	ABEV	moderate_disorder
DS.HH.2.2.45	HH	2	2	45	8	9.33333	6.97633	91.2387	253.581	28.7473	19.3333	0.493827	a.211.1.1	HD domain	0.0944206	Metabolism	Other enzymes	ABEV	high_disorder
DS.HH.4.26.3	HH	4	26	3	11	4	11.059	53.1317	114.458	20.9797	19	0.015873	a.211.1.1	HD domain	0.0944206	Metabolism	Other enzymes	ABEV	ordered
DS.HH.5.3.12	HH	5	3	12	14	8	9.43833	155.352	350.489	93.776	27	0.480889	a.211.1.1	HD domain	0.0944206	Metabolism	Other enzymes	ABEV	high_disorder
DS.EH.8.3.1	EH	8	3	1	4.5	7.5	9.08775	157.117	188.033	95.3418	20	0.262813	c.2.1.7	Aminoacid dehydrogenase-like, C-terminal domain	0.0944206	General	Small molecule binding	ABEV	moderate_disorder
DS.GH.3.5.2	GH	3	5	2	3	7	8.177	106.666	105.117	34.8862	13	0.894118	c.30.1.1	BC N-terminal domain-like	0.0944206	Metabolism	Coenzyme metabolism	ABEV	high_disorder
DS.EH.4.53.2	EH	4	53	2	6.33333	6	7.46	117.344	53.0423	62.337	16.3333	0.597222	a.211.1.1	HD domain	0.0944206	Metabolism	Other enzymes	ABEV	high_disorder
DS.BK.4.134.1	BK	4	134	1	5	9.33333	13.788	118.372	72.3533	36.8623	18.3333	0.143275	d.142.1.2	BC ATP-binding domain-like	0.0944206	Metabolism	Coenzyme metabolism	ABEV	moderate_disorder
DS.EG.2.20.3	EG	2	20	3	5.66667	3.33333	9.045	27.9947	241.646	28.3363	11	1	d.142.1.2	BC ATP-binding domain-like	0.0944206	Metabolism	Coenzyme metabolism	ABEV	high_disorder
DS.GE.2.9.2	GE	2	9	2	3	3.625	8.97387	126.274	109.396	108.163	8.625	0.885417	d.142.1.2	BC ATP-binding domain-like	0.0944206	Metabolism	Coenzyme metabolism	ABEV	high_disorder
DS.HH.3.12.6	HH	3	12	6	8.33333	8.66667	12.2253	88.69	61.432	133.361	20	0.25	d.142.1.2	BC ATP-binding domain-like	0.0944206	Metabolism	Coenzyme metabolism	ABEV	moderate_disorder
DS.HH.8.15.1	HH	8	15	1	14	13.3333	16.088	78.8513	352.671	147.81	35.3333	0.255026	c.79.1.1	Tryptophan synthase beta subunit-like PLP-dependent enzymes	0.103004	Metabolism	Amino acid transport and metabolism	ABEV	moderate_disorder
DS.GH.6.3.1	GH	6	3	1	3	14.3333	9.27967	85.2963	65.063	118.294	23.3333	0.718599	c.79.1.1	Tryptophan synthase beta subunit-like PLP-dependent enzymes	0.103004	Metabolism	Amino acid transport and metabolism	ABEV	high_disorder
DS.GG.1.7.1	GG	1	7	1	3.5	3	6.78533	111.724	210.062	71.6853	7.5	1	c.79.1.1	Tryptophan synthase beta subunit-like PLP-dependent enzymes	0.103004	Metabolism	Amino acid transport and metabolism	ABEV	high_disorder
DS.HH.1.1.33	HH	1	1	33	11.1111	9.94444	4.49033	34.8413	124.052	31.2128	22.0556	0.464664	c.79.1.1	Tryptophan synthase beta subunit-like PLP-dependent enzymes	0.103004	Metabolism	Amino acid transport and metabolism	ABEV	high_disorder
DS.HE.2.7.6	HE	2	7	6	7.6	6	8.2354	130.582	13.7728	121.06	15.6	0.404444	c.79.1.1	Tryptophan synthase beta subunit-like PLP-dependent enzymes	0.103004	Metabolism	Amino acid transport and metabolism	ABEV	high_disorder
DS.EG.0.10.2	EG	0	10	2	6	3	3.381	49.2722	218.202	37.905	9	1	c.79.1.1	Tryptophan synthase beta subunit-like PLP-dependent enzymes	0.103004	Metabolism	Amino acid transport and metabolism	ABEV	high_disorder
DS.EG.0.10.1	EG	0	10	1	6.125	3	3.2565	47.9771	235.531	32.1	9.125	0.75	c.79.1.1	Tryptophan synthase beta subunit-like PLP-dependent enzymes	0.103004	Metabolism	Amino acid transport and metabolism	ABEV	high_disorder
DS.GE.2.1.9	GE	2	1	9	3	4.57143	8.23514	143.216	24.179	116.522	9.57143	1	c.56.5.4	Bacterial dinuclear zinc exopeptidases	0.107296	Intracellular_processes	Proteases, peptidases and their inhibitors	ABEV	high_disorder
DS.EH.0.1.28	EH	0	1	28	5.11765	8.82353	2.80818	68.3405	15.5306	10.8752	13.9412	0.582892	c.56.5.4	Bacterial dinuclear zinc exopeptidases	0.107296	Intracellular_processes	Proteases, peptidases and their inhibitors	ABEV	high_disorder
DS.EH.1.6.4	EH	1	6	4	3.84615	10.7692	5.54015	53.3515	156.004	25.4828	15.6154	0.579063	c.1.4.1	FMN-linked oxidoreductases	0.107296	General	Protein-protein interaction (dimerization domains)	ABE	high_disorder
DS.EG.3.16.1	EG	3	16	1	5.125	3	8.42137	27.3626	19.6345	28.0486	11.125	0.270833	c.67.1.1	AAT-like	0.107296	Metabolism	Transferases	ABEV	moderate_disorder
DS.HG.2.15.2	HG	2	15	2	4	3	9.243	105.079	19.9398	138.758	9	1	c.67.1.3	Cystathionine synthase-like	0.107296	Metabolism	Transferases	ABEV	high_disorder
DS.HE.4.50.3	HE	4	50	3	7	6.66667	9.55533	113.762	82.4953	52.618	17.6667	0.340959	c.67.1.3	Cystathionine synthase-like	0.107296	Metabolism	Transferases	ABEV	high_disorder
DS.GG.1.5.2	GG	1	5	2	4	3	6.8055	137.875	320.05	96.0512	8	1	c.67.1.3	Cystathionine synthase-like	0.107296	Metabolism	Transferases	ABEV	high_disorder
DS.EH.6.42.1	EH	6	42	1	4.5	13.75	12.5907	169.068	58.7275	55.6658	24.25	0.206545	c.67.1.3	Cystathionine synthase-like	0.107296	Metabolism	Transferases	ABEV	moderate_disorder
DS.EG.0.2.23	EG	0	2	23	3.71429	4	3.38229	65.8121	215.349	8.72029	7.71429	1	c.67.1.1	AAT-like	0.107296	Metabolism	Transferases	ABEV	high_disorder
DS.BN.12.4.1	BN	12	4	1	6	4.5	4.74975	160.565	345.648	96.767	22.5	0.0454545	c.67.1.1	AAT-like	0.107296	Metabolism	Transferases	ABEV	ordered
DS.EH.2.83.1	EH	2	83	1	4	16.3333	8.90533	114.236	27.4393	73.6367	22.3333	0.228433	c.56.5.4	Bacterial dinuclear zinc exopeptidases	0.107296	Intracellular_processes	Proteases, peptidases and their inhibitors	ABEV	moderate_disorder
DS.HH.12.2.1	HH	12	2	1	12	15	16.5017	162.305	114.017	110.027	39	0.777778	c.67.1.1	AAT-like	0.107296	Metabolism	Transferases	ABEV	high_disorder
DS.EH.5.130.1	EH	5	130	1	5	13	13.2033	157.144	358.638	63.5297	23	0.30754	c.67.1.3	Cystathionine synthase-like	0.107296	Metabolism	Transferases	ABEV	high_disorder
DS.EH.1.14.1	EH	1	14	1	4.45	12.95	6.7737	109.936	346.908	53.3312	18.4	0.231154	c.67.1.1	AAT-like	0.107296	Metabolism	Transferases	ABEV	moderate_disorder
DS.GE.4.38.1	GE	4	38	1	4	5	9.75533	75.0743	3.19333	156.171	13	1	c.67.1.1	AAT-like	0.107296	Metabolism	Transferases	ABEV	high_disorder
DS.GE.2.6.4	GE	2	6	4	3	5.25	9.38738	84.6718	95.4791	86.1379	10.25	0.625	c.67.1.1	AAT-like	0.107296	Metabolism	Transferases	ABEV	high_disorder
DS.GE.2.6.3	GE	2	6	3	3.375	5	9.50388	85.4404	81.3801	93.6684	10.375	1	c.67.1.1	AAT-like	0.107296	Metabolism	Transferases	ABEV	high_disorder
DS.EH.5.41.1	EH	5	41	1	6	7	10.6278	149.462	140.885	122.904	18	0.212963	c.67.1.1	AAT-like	0.107296	Metabolism	Transferases	ABEV	moderate_disorder
DS.GG.2.2.5	GG	2	2	5	3.16667	3	9.07433	82.2212	346.031	54.2622	8.16667	1	c.1.4.1	FMN-linked oxidoreductases	0.107296	General	Protein-protein interaction (dimerization domains)	ABE	high_disorder
DS.EH.4.45.2	EH	4	45	2	5	14	12.2733	151.413	102.709	34.8163	23	0.263333	c.67.1.1	AAT-like	0.107296	Metabolism	Transferases	ABEV	moderate_disorder
DS.HE.2.1.2	HE	2	1	2	13.4968	5.07643	8.57425	158.342	103.488	116.009	20.5732	0.380576	c.67.1.1	AAT-like	0.107296	Metabolism	Transferases	ABEV	high_disorder
DS.EH.2.27.1	EH	2	27	1	4.33333	12.2	7.1358	120.824	10.1094	61.9185	18.5333	0.201672	c.67.1.1	AAT-like	0.107296	Metabolism	Transferases	ABEV	moderate_disorder
DS.EH.11.10.1	EH	11	10	1	7	13.6667	13.209	162.591	249.898	82.8353	31.6667	0.315524	c.67.1.1	AAT-like	0.107296	Metabolism	Transferases	ABEV	high_disorder
DS.HH.14.4.1	HH	14	4	1	6	18.6	8.948	164.252	117.659	36.4434	38.6	0.30135	c.1.4.1	FMN-linked oxidoreductases	0.107296	General	Protein-protein interaction (dimerization domains)	ABE	high_disorder
DS.EH.11.1.1	EH	11	1	1	6.8	13.4	13.1856	167.007	250.51	76.6364	31.2	0.338437	c.67.1.1	AAT-like	0.107296	Metabolism	Transferases	ABEV	high_disorder
DS.BK.9.14.1	BK	9	14	1	2	3	5.74033	47.1407	192.683	123.515	14	0.452381	c.67.1.3	Cystathionine synthase-like	0.107296	Metabolism	Transferases	ABEV	high_disorder
DS.BN.13.2.1	BN	13	2	1	5	5	4.6815	153.763	5.04525	91.5468	23	0.336957	c.67.1.3	Cystathionine synthase-like	0.107296	Metabolism	Transferases	ABEV	high_disorder
DS.EH.5.101.1	EH	5	101	1	4.75	13.25	13.5905	158.46	8.5675	63.6015	23	0.200791	c.67.1.3	Cystathionine synthase-like	0.107296	Metabolism	Transferases	ABEV	moderate_disorder
DS.EH.11.3.1	EH	11	3	1	2	10.5	26.6507	82.2832	23.7943	64.6347	23.5	0.908636	c.67.1.1	AAT-like	0.107296	Metabolism	Transferases	ABEV	high_disorder
DS.EG.7.4.1	EG	7	4	1	6	3	9.63167	92.1627	352.935	30.9743	16	0.3125	c.67.1.1	AAT-like	0.107296	Metabolism	Transferases	ABEV	high_disorder
DS.BK.6.26.1	BK	6	26	1	2.6	5.4	11.0136	141.736	304.96	50.3046	14	0.501667	c.67.1.1	AAT-like	0.107296	Metabolism	Transferases	ABEV	high_disorder
DS.GE.3.23.2	GE	3	23	2	4.66667	6.33333	7.33867	117.19	183.905	86.295	14	0.822222	c.2.1.4	Formate/glycerate dehydrogenases, NAD-domain	0.111588	General	Small molecule binding	ABEV	high_disorder
DS.HE.4.191.1	HE	4	191	1	6	5	9.85233	130.872	22.4513	67.864	15	0.8	c.2.1.4	Formate/glycerate dehydrogenases, NAD-domain	0.111588	General	Small molecule binding	ABEV	high_disorder
DS.HE.3.9.12	HE	3	9	12	5.66667	3	8.52	173.091	160.865	120.18	11.6667	1	c.2.1.4	Formate/glycerate dehydrogenases, NAD-domain	0.111588	General	Small molecule binding	ABEV	high_disorder
DS.GH.2.2.9	GH	2	2	9	3	9.58824	9.20229	78.9042	28.0988	95.2977	14.5882	0.853501	c.2.1.4	Formate/glycerate dehydrogenases, NAD-domain	0.111588	General	Small molecule binding	ABEV	high_disorder
DS.GE.3.82.1	GE	3	82	1	3	5	8.67533	121.833	175.891	112.244	11	1	c.2.1.4	Formate/glycerate dehydrogenases, NAD-domain	0.111588	General	Small molecule binding	ABEV	high_disorder
DS.BK.3.3.6	BK	3	3	6	3.66667	5	8.79967	137.194	54.7177	57.4803	11.6667	0.666667	b.84.1.1	Biotinyl/lipoyl-carrier proteins and domains	0.111588	Metabolism	Coenzyme metabolism	ABE	high_disorder
DS.EH.6.93.1	EH	6	93	1	5	7	14.6823	139.683	297.351	107.294	18	1	c.2.1.4	Formate/glycerate dehydrogenases, NAD-domain	0.111588	General	Small molecule binding	ABEV	high_disorder
DS.EH.5.176.1	EH	5	176	1	5.33333	10	8.40133	156.551	55.2973	73.6267	20.3333	0.47151	c.2.1.4	Formate/glycerate dehydrogenases, NAD-domain	0.111588	General	Small molecule binding	ABEV	high_disorder
DS.EH.3.4.16	EH	3	4	16	3.33333	8.66667	10.1973	128.986	37.1523	30.7453	15	0.695652	c.2.1.4	Formate/glycerate dehydrogenases, NAD-domain	0.111588	General	Small molecule binding	ABEV	high_disorder
DS.EH.13.6.1	EH	13	6	1	4	4	16.6463	115.684	289.265	108.232	21	0.333333	c.2.1.4	Formate/glycerate dehydrogenases, NAD-domain	0.111588	General	Small molecule binding	ABEV	high_disorder
DS.EG.3.7.1	EG	3	7	1	4.8	3	9.00133	123.768	16.0393	54.8351	10.8	1	c.2.1.4	Formate/glycerate dehydrogenases, NAD-domain	0.111588	General	Small molecule binding	ABEV	high_disorder
DS.BK.4.200.1	BK	4	200	1	4.66667	5.33333	11.7287	113.259	65.6637	23.7197	14	0.809524	b.84.1.1	Biotinyl/lipoyl-carrier proteins and domains	0.111588	Metabolism	Coenzyme metabolism	ABE	high_disorder
DS.BK.4.55.1	BK	4	55	1	3.5	7.66667	12.4043	109.473	59.7445	24.11	15.1667	0.698413	b.84.1.1	Biotinyl/lipoyl-carrier proteins and domains	0.111588	Metabolism	Coenzyme metabolism	ABE	high_disorder
DS.BK.6.10.1	BK	6	10	1	4.875	2	13.3178	97.9183	13.8419	25.6663	12.875	0.847274	b.84.1.1	Biotinyl/lipoyl-carrier proteins and domains	0.111588	Metabolism	Coenzyme metabolism	ABE	high_disorder
DS.HE.4.224.1	HE	4	224	1	6	5	10.334	130.127	24.489	71.68	15	0.577778	c.2.1.4	Formate/glycerate dehydrogenases, NAD-domain	0.111588	General	Small molecule binding	ABEV	high_disorder
DS.BK.4.14.2	BK	4	14	2	4	4.5	7.709	127.037	145.649	67.961	12.5	0.615385	b.84.1.1	Biotinyl/lipoyl-carrier proteins and domains	0.111588	Metabolism	Coenzyme metabolism	ABE	high_disorder
DS.BK.1.3.3	BK	1	3	3	3.6	4.6	6.3132	18.1877	173.549	11.8054	9.2	0.759524	c.1.10.1	Class I aldolase	0.11588	Metabolism	Carbohydrate transport and metabolism	ABEV	high_disorder
DS.EH.6.10.1	EH	6	10	1	3.5	13.3	10.6529	137.78	327.554	70.6105	22.8	0.739178	d.113.1.1	MutT-like	0.11588	Information	DNA replication, recombination, repair	ABEV	high_disorder
DS.EH.2.33.3	EH	2	33	3	4.33333	4	9.565	57.936	287.209	21.3763	10.3333	0.333333	c.1.10.1	Class I aldolase	0.11588	Metabolism	Carbohydrate transport and metabolism	ABEV	high_disorder
DS.HE.4.1.1	HE	4	1	1	12.1449	4.65942	9.23998	155.326	31.8528	99.8596	20.8043	0.362063	c.1.10.1	Class I aldolase	0.11588	Metabolism	Carbohydrate transport and metabolism	ABEV	high_disorder
DS.EH.6.4.1	EH	6	4	1	3.92308	14.3846	9.70738	132.16	330.239	73.3175	24.3077	0.896801	d.113.1.1	MutT-like	0.11588	Information	DNA replication, recombination, repair	ABEV	high_disorder
DS.HE.1.24.1	HE	1	24	1	10.5	9.66667	6.679	160.441	28.3752	118.736	21.1667	0.616506	d.113.1.1	MutT-like	0.11588	Information	DNA replication, recombination, repair	ABEV	high_disorder
DS.HE.4.1.9	HE	4	1	9	11.875	4.625	9.21431	163.781	70.8988	86.9874	20.5	0.418209	c.93.1.1	L-arabinose binding protein-like	0.124464	Regulation	DNA-binding (transcription factors)	ABEV	high_disorder
DS.EH.4.9.1	EH	4	9	1	7.52174	13.3043	10.4674	157.625	32.3989	36.0757	24.8261	0.541645	c.93.1.1	L-arabinose binding protein-like	0.124464	Regulation	DNA-binding (transcription factors)	ABEV	high_disorder
DS.EH.4.11.1	EH	4	11	1	6.46667	12.8	10.2569	161.915	57.6082	39.8523	23.2667	0.64912	c.93.1.1	L-arabinose binding protein-like	0.124464	Regulation	DNA-binding (transcription factors)	ABEV	high_disorder
DS.EH.3.23.1	EH	3	23	1	2.3125	9.5	7.1155	57.8685	60.1523	37.2112	14.8125	0.82619	c.108.1.6	beta-Phosphoglucomutase-like	0.124464	Metabolism	Other enzymes	ABEV	high_disorder
DS.EH.1.5.25	EH	1	5	25	2	11.3333	5.504	41.196	84.73	5.31067	14.3333	0.56427	c.108.1.6	beta-Phosphoglucomutase-like	0.124464	Metabolism	Other enzymes	ABEV	high_disorder
DS.BK.11.1.1	BK	11	1	1	8.45455	4.09091	13.0374	76.334	16.0448	133.185	23.5455	0.495324	b.35.1.2	Alcohol dehydrogenase-like, N-terminal domain	0.128755	Intracellular_processes	Posttranslational modification, protein turnover, chaperones	ABEV	high_disorder
DS.HH.4.1.3	HH	4	1	3	14.5714	17.8214	10.65	149.396	302.445	98.2242	36.3929	0.205396	c.72.1.1	Ribokinase-like	0.128755	Metabolism	Other enzymes	ABEV	moderate_disorder
DS.HE.4.7.1	HE	4	7	1	12.0909	5.15909	6.82875	145.891	74.5311	79.585	21.25	0.433258	c.72.1.1	Ribokinase-like	0.128755	Metabolism	Other enzymes	ABEV	high_disorder
DS.HE.2.2.3	HE	2	2	3	9.29268	4.65854	7.27349	127.473	79.0866	69.6269	15.9512	0.550659	c.72.1.1	Ribokinase-like	0.128755	Metabolism	Other enzymes	ABEV	high_disorder
DS.GE.2.2.2	GE	2	2	2	3.06818	4.61364	8.504	146.095	59.6032	99.6821	9.68182	0.797348	c.72.1.1	Ribokinase-like	0.128755	Metabolism	Other enzymes	ABEV	high_disorder
DS.GE.1.12.1	GE	1	12	1	3.07143	5.57143	6.79111	83.429	75.0992	98.7974	9.64286	1	c.72.1.1	Ribokinase-like	0.128755	Metabolism	Other enzymes	ABEV	high_disorder
DS.EH.2.9.6	EH	2	9	6	6.42857	13.7143	6.62557	129.912	167.827	64.1566	22.1429	0.507099	c.72.1.1	Ribokinase-like	0.128755	Metabolism	Other enzymes	ABEV	high_disorder
DS.EH.2.6.6	EH	2	6	6	7.25	11.375	6.64438	126.34	167.698	67.1214	20.625	0.541302	c.72.1.1	Ribokinase-like	0.128755	Metabolism	Other enzymes	ABEV	high_disorder
DS.EH.12.1.1	EH	12	1	1	4.33333	14	16.4475	111.448	347.248	62.7418	30.3333	0.275967	c.72.1.1	Ribokinase-like	0.128755	Metabolism	Other enzymes	ABEV	moderate_disorder
DS.EG.1.45.1	EG	1	45	1	6.66667	5	5.33833	52.51	172.136	21.2663	12.6667	0.769231	c.72.1.1	Ribokinase-like	0.128755	Metabolism	Other enzymes	ABEV	high_disorder
DS.HE.0.2.1	HE	0	2	1	12.1212	5.48485	3.19255	50.2698	146.72	65.7749	17.6061	0.571124	c.2.1.1	Alcohol dehydrogenase-like, C-terminal domain	0.128755	General	Small molecule binding	ABEV	high_disorder
DS.HG.3.2.8	HG	3	2	8	4	3	6.9768	164.419	68.9086	94.5952	10	1	b.35.1.2	Alcohol dehydrogenase-like, N-terminal domain	0.128755	Intracellular_processes	Posttranslational modification, protein turnover, chaperones	ABEV	high_disorder
DS.HE.4.20.1	HE	4	20	1	12.3077	4.92308	8.91738	166.914	106.612	96.3117	21.2308	0.318532	c.2.1.1	Alcohol dehydrogenase-like, C-terminal domain	0.128755	General	Small molecule binding	ABEV	high_disorder
DS.HH.2.1.125	HH	2	1	125	13.6667	9	6.68367	11.534	11.598	35.5753	24.6667	0.202222	a.4.5.28	MarR-like transcriptional regulators	0.128755	Regulation	DNA-binding (transcription factors)	ABEV	moderate_disorder
DS.BK.3.28.1	BK	3	28	1	4.7	6.6	12.5738	70.8682	57.1401	54.372	14.3	0.287468	c.72.1.1	Ribokinase-like	0.128755	Metabolism	Other enzymes	ABEV	moderate_disorder
DS.BK.3.28.2	BK	3	28	2	4.42857	7.14286	12.7836	57.877	58.3924	50.3479	14.5714	0.338095	c.72.1.1	Ribokinase-like	0.128755	Metabolism	Other enzymes	ABEV	high_disorder
DS.BN.14.2.1	BN	14	2	1	7	7	5.00825	164.92	342.786	99.9232	28	0.571429	c.72.1.1	Ribokinase-like	0.128755	Metabolism	Other enzymes	ABEV	high_disorder
DS.EG.1.12.1	EG	1	12	1	4.93333	3	6.56	94.3153	12.777	17.4695	8.93333	1	c.72.1.1	Ribokinase-like	0.128755	Metabolism	Other enzymes	ABEV	high_disorder
DS.EG.1.12.2	EG	1	12	2	5.92857	3	6.65814	84.4294	348.99	25.6685	9.92857	0.950549	c.72.1.1	Ribokinase-like	0.128755	Metabolism	Other enzymes	ABEV	high_disorder
DS.HG.1.1.75	HG	1	1	75	8.33333	3.33333	4.17833	52.428	40.5983	35.6347	12.6667	0.666667	c.2.1.1	Alcohol dehydrogenase-like, C-terminal domain	0.128755	General	Small molecule binding	ABEV	high_disorder
DS.HE.9.4.1	HE	9	4	1	10.75	4.5	12.4738	150.786	12.995	63.2665	24.25	0.281668	c.2.1.1	Alcohol dehydrogenase-like, C-terminal domain	0.128755	General	Small molecule binding	ABEV	moderate_disorder
DS.HE.5.33.5	HE	5	33	5	9	5	8.95967	160.51	54.5093	93.2927	19	0.581236	c.2.1.1	Alcohol dehydrogenase-like, C-terminal domain	0.128755	General	Small molecule binding	ABEV	high_disorder
DS.HE.4.4.13	HE	4	4	13	8.8	4	7.9322	166.481	30.0478	97.0056	16.8	0.831176	c.2.1.1	Alcohol dehydrogenase-like, C-terminal domain	0.128755	General	Small molecule binding	ABEV	high_disorder
DS.EH.5.14.2	EH	5	14	2	3.66667	12.3333	11.2703	160.924	184.223	57.4787	21	0.333045	c.2.1.1	Alcohol dehydrogenase-like, C-terminal domain	0.128755	General	Small molecule binding	ABEV	high_disorder
DS.EH.4.112.1	EH	4	112	1	5.5	9.75	10.8335	171.394	252.33	64.7945	19.25	0.469591	c.2.1.1	Alcohol dehydrogenase-like, C-terminal domain	0.128755	General	Small molecule binding	ABEV	high_disorder
DS.GH.1.10.1	GH	1	10	1	4	13	3.32767	30.66	140.215	81.4583	18	0.335979	c.2.1.1	Alcohol dehydrogenase-like, C-terminal domain	0.128755	General	Small molecule binding	ABEV	high_disorder
DS.EH.2.1.79	EH	2	1	79	6	9.25	8.43875	167.027	7.84525	75.2283	17.25	0.410948	c.2.1.1	Alcohol dehydrogenase-like, C-terminal domain	0.128755	General	Small molecule binding	ABEV	high_disorder
DS.EG.2.2.11	EG	2	2	11	4	3.33333	10.322	86.1767	288.525	8.251	9.33333	1	c.2.1.1	Alcohol dehydrogenase-like, C-terminal domain	0.128755	General	Small molecule binding	ABEV	high_disorder
DS.HE.4.30.1	HE	4	30	1	10.3571	5	8.42386	167.549	77.8736	97.9094	19.3571	0.430271	c.2.1.1	Alcohol dehydrogenase-like, C-terminal domain	0.128755	General	Small molecule binding	ABEV	high_disorder
DS.EH.3.150.1	EH	3	150	1	5.33333	8.66667	11.3213	164.993	293.496	66.5957	17	0.696296	c.2.1.1	Alcohol dehydrogenase-like, C-terminal domain	0.128755	General	Small molecule binding	ABEV	high_disorder
DS.BK.3.109.1	BK	3	109	1	4.75	5	10.249	76.4177	64.395	54.8308	12.75	0.683333	c.72.1.1	Ribokinase-like	0.128755	Metabolism	Other enzymes	ABEV	high_disorder
DS.EH.2.50.1	EH	2	50	1	5.6	10.6	7.4312	121.802	32.272	86.737	18.2	0.62663	d.87.1.1	FAD/NAD-linked reductases, dimerisation (C-terminal) domain	0.133047	Metabolism	Oxidation/Reduction	ABE	high_disorder
DS.HH.1.2.36	HH	1	2	36	8.66667	4	6.24633	136.991	175.692	52.8133	13.6667	1	d.81.1.5	Glucose 6-phosphate dehydrogenase-like	0.137339	Metabolism	Energy production and conversion	ABEV	high_disorder
DS.HE.6.6.2	HE	6	6	2	11	8.25	10.1602	102.457	99.7415	68.1442	25.25	0.512542	d.81.1.5	Glucose 6-phosphate dehydrogenase-like	0.137339	Metabolism	Energy production and conversion	ABEV	high_disorder
DS.GG.1.1.19	GG	1	1	19	4	3	6.223	113.382	187.907	63.898	8	1	d.81.1.5	Glucose 6-phosphate dehydrogenase-like	0.137339	Metabolism	Energy production and conversion	ABEV	high_disorder
DS.BK.5.12.1	BK	5	12	1	4.45455	2	13.1335	100.853	53.3363	55.6857	11.4545	1	e.3.1.1	beta-Lactamase/D-ala carboxypeptidase	0.137339	Metabolism	Other enzymes	ABEV	high_disorder
DS.BK.6.22.1	BK	6	22	1	2	2	12.5767	59.7588	128.049	55.0468	10	1	e.3.1.1	beta-Lactamase/D-ala carboxypeptidase	0.137339	Metabolism	Other enzymes	ABEV	high_disorder
DS.BK.3.12.3	BK	3	12	3	4.14286	3.14286	12.4724	57.2949	55.3383	34.4007	10.2857	0.933333	d.58.19.1	Bacterial exopeptidase dimerisation domain	0.137339	Intracellular_processes	Proteases, peptidases and their inhibitors	ABE	high_disorder
DS.BN.3.3.9	BN	3	3	9	6	6.8	4.3678	175.016	81.7498	92.4166	15.8	0.67619	d.58.19.1	Bacterial exopeptidase dimerisation domain	0.137339	Intracellular_processes	Proteases, peptidases and their inhibitors	ABE	high_disorder
DS.BN.4.50.2	BN	4	50	2	7.8	2	5.7644	146.648	272.595	121.269	13.8	0.888889	e.3.1.1	beta-Lactamase/D-ala carboxypeptidase	0.137339	Metabolism	Other enzymes	ABEV	high_disorder
DS.EH.1.2.2	EH	1	2	2	3.775	9.85	6.8104	97.465	33.5991	12.7558	14.625	0.680886	e.3.1.1	beta-Lactamase/D-ala carboxypeptidase	0.137339	Metabolism	Other enzymes	ABEV	high_disorder
DS.GH.3.7.3	GH	3	7	3	3	16	12.848	105.847	153.876	103.987	22	0.591667	d.58.19.1	Bacterial exopeptidase dimerisation domain	0.137339	Intracellular_processes	Proteases, peptidases and their inhibitors	ABE	high_disorder
DS.GE.1.2.2	GE	1	2	2	3	4.53521	6.45751	106.807	100.265	95.798	8.53521	0.968075	c.1.7.1	Aldo-keto reductases (NADP)	0.137339	Metabolism	Oxidation/Reduction	ABEV	high_disorder
DS.HE.3.2.6	HE	3	2	6	13.0476	4.42857	10.4097	161.887	37.4248	114.924	20.4762	0.396691	c.1.7.1	Aldo-keto reductases (NADP)	0.137339	Metabolism	Oxidation/Reduction	ABEV	high_disorder
DS.EG.3.65.1	EG	3	65	1	6	4	6.644	53.6433	66.7513	29.97	13	0.153846	c.66.1.43	CAC2371-like	0.137339	Metabolism	Transferases	ABEV	moderate_disorder
DS.EH.7.19.1	EH	7	19	1	5	9	10.4672	141.982	161.608	80.4818	21	0.52381	c.1.7.1	Aldo-keto reductases (NADP)	0.137339	Metabolism	Oxidation/Reduction	ABEV	high_disorder
DS.EH.3.9.1	EH	3	9	1	6	10.8235	10.799	164.82	26.1729	68.5295	19.8235	0.341736	c.1.7.1	Aldo-keto reductases (NADP)	0.137339	Metabolism	Oxidation/Reduction	ABEV	high_disorder
DS.EG.1.4.1	EG	1	4	1	4.96774	3.16129	6.6241	82.3516	249.378	19.1277	9.12903	0.876344	c.1.7.1	Aldo-keto reductases (NADP)	0.137339	Metabolism	Oxidation/Reduction	ABEV	high_disorder
DS.BK.3.16.1	BK	3	16	1	3.27273	3.68182	10.3361	78.4913	108.787	53.0335	9.95455	0.835498	c.1.7.1	Aldo-keto reductases (NADP)	0.137339	Metabolism	Oxidation/Reduction	ABEV	high_disorder
DS.HE.5.75.1	HE	5	75	1	11.4	4.2	11.3228	168.705	190.579	120.817	20.6	0.352763	c.66.1.43	CAC2371-like	0.137339	Metabolism	Transferases	ABEV	high_disorder
DS.HE.5.6.3	HE	5	6	3	11	8	8.89275	162.374	353.782	82.9995	24	0.278475	c.66.1.43	CAC2371-like	0.137339	Metabolism	Transferases	ABEV	moderate_disorder
DS.HE.3.49.3	HE	3	49	3	9	7.25	6.86375	124.743	109.056	50.8495	19.25	0.619758	c.66.1.43	CAC2371-like	0.137339	Metabolism	Transferases	ABEV	high_disorder
DS.BK.12.4.1	BK	12	4	1	4.4	6.8	16.8416	99.316	154.892	106.829	23.2	0.279224	c.66.1.43	CAC2371-like	0.137339	Metabolism	Transferases	ABEV	moderate_disorder
DS.GH.3.3.6	GH	3	3	6	3.5	15.75	10.3673	159.141	58.787	61.272	22.25	0.233886	c.66.1.43	CAC2371-like	0.137339	Metabolism	Transferases	ABEV	moderate_disorder
DS.EH.3.7.3	EH	3	7	3	6.75	9.5	12.4159	79.621	330.366	16.1752	19.25	0.394057	c.66.1.43	CAC2371-like	0.137339	Metabolism	Transferases	ABEV	high_disorder
DS.GH.0.1.35	GH	0	1	35	3.13636	10	2.785	54.0675	75.6345	71.7291	13.1364	0.643937	e.3.1.1	beta-Lactamase/D-ala carboxypeptidase	0.137339	Metabolism	Other enzymes	ABEV	high_disorder
DS.BN.4.44.2	BN	4	44	2	7.5	7.75	4.9355	138.216	348.11	97.0435	19.25	0.650641	c.66.1.43	CAC2371-like	0.137339	Metabolism	Transferases	ABEV	high_disorder
DS.HE.6.19.1	HE	6	19	1	13	3.66667	10.4287	151.643	63.8753	120.406	22.6667	0.512516	c.1.7.1	Aldo-keto reductases (NADP)	0.137339	Metabolism	Oxidation/Reduction	ABEV	high_disorder
DS.GH.0.1.40	GH	0	1	40	3.15789	11.0526	2.37821	36.4473	80.9117	70.0442	14.2105	0.620651	e.3.1.1	beta-Lactamase/D-ala carboxypeptidase	0.137339	Metabolism	Other enzymes	ABEV	high_disorder
DS.BN.2.15.8	BN	2	15	8	9.2	8	5.038	174.251	324.146	102.165	19.2	0.468254	e.3.1.1	beta-Lactamase/D-ala carboxypeptidase	0.137339	Metabolism	Other enzymes	ABEV	high_disorder
DS.HH.3.4.6	HH	3	4	6	9.36364	10.5455	9.46082	127.814	190.99	111.634	22.9091	0.350461	e.3.1.1	beta-Lactamase/D-ala carboxypeptidase	0.137339	Metabolism	Other enzymes	ABEV	high_disorder
DS.HG.9.1.2	HG	9	1	2	20	3	21.7344	60.4783	343.077	141.332	32	0.292614	d.144.1.7	Protein kinases, catalytic subunit	0.137339	Regulation	Kinases and phosphatases and inhibitors	ABEV	moderate_disorder
DS.HG.9.1.1	HG	9	1	1	20	3	20.957	58.1108	348.948	140.509	32	0.258523	d.144.1.7	Protein kinases, catalytic subunit	0.137339	Regulation	Kinases and phosphatases and inhibitors	ABEV	moderate_disorder
DS.HG.4.6.3	HG	4	6	3	10	3	9.53	129.248	34.5944	12.6562	17	0.376471	d.144.1.7	Protein kinases, catalytic subunit	0.137339	Regulation	Kinases and phosphatases and inhibitors	ABEV	high_disorder
DS.HH.7.8.1	HH	7	8	1	8	11.1667	14.8253	84.486	200.208	106.31	26.1667	0.39981	a.35.1.3	SinR domain-like	0.137339	Regulation	DNA-binding (transcription factors)	ABEV	high_disorder
DS.HE.8.1.1	HE	8	1	1	12.1667	6.66667	8.42	86.0007	170.969	96.585	26.8333	0.239637	d.144.1.7	Protein kinases, catalytic subunit	0.137339	Regulation	Kinases and phosphatases and inhibitors	ABEV	moderate_disorder
DS.GH.3.2.3	GH	3	2	3	3	12.7143	11.8317	47.1913	12.3277	80.0081	18.7143	0.743699	d.144.1.7	Protein kinases, catalytic subunit	0.137339	Regulation	Kinases and phosphatases and inhibitors	ABEV	high_disorder
DS.GH.3.2.1	GH	3	2	1	3.11111	8.81481	11.6088	39.2926	15.4536	81.5996	14.9259	0.897714	d.144.1.7	Protein kinases, catalytic subunit	0.137339	Regulation	Kinases and phosphatases and inhibitors	ABEV	high_disorder
DS.HE.8.7.1	HE	8	7	1	13.25	3.5	14.8067	127.707	60.0282	100.485	24.75	0.275789	e.3.1.1	beta-Lactamase/D-ala carboxypeptidase	0.137339	Metabolism	Other enzymes	ABEV	moderate_disorder
DS.EH.9.16.1	EH	9	16	1	4	6	13.0513	165.226	233.268	121.161	19	0.315789	c.23.12.1	Formate/glycerate dehydrogenases, substrate-binding domain	0.137339	Metabolism	Oxidation/Reduction	ABEV	high_disorder
DS.HE.3.87.2	HE	3	87	2	9	5.33333	6.39	113.818	82.784	51.3533	17.3333	0.753623	c.23.12.1	Formate/glycerate dehydrogenases, substrate-binding domain	0.137339	Metabolism	Oxidation/Reduction	ABEV	high_disorder
DS.HE.5.36.2	HE	5	36	2	12	3.25	11.495	167.15	142.092	108.968	20.25	0.600535	c.23.12.1	Formate/glycerate dehydrogenases, substrate-binding domain	0.137339	Metabolism	Oxidation/Reduction	ABEV	high_disorder
DS.HE.6.43.1	HE	6	43	1	5	4.25	11.3317	129.416	38.564	78.9213	15.25	0.395833	c.23.12.1	Formate/glycerate dehydrogenases, substrate-binding domain	0.137339	Metabolism	Oxidation/Reduction	ABEV	high_disorder
DS.BN.2.34.2	BN	2	34	2	3.75	5.5	4.79575	159.024	356.414	95.8945	11.25	0.883333	d.163.1.1	Lambda integrase-like, catalytic core	0.137339	Information	DNA replication, recombination, repair	ABEV	high_disorder
DS.BN.4.63.1	BN	4	63	1	4.6	4.6	5.0638	145.974	338.893	100.169	13.2	0.847368	d.163.1.1	Lambda integrase-like, catalytic core	0.137339	Information	DNA replication, recombination, repair	ABEV	high_disorder
DS.EH.5.106.1	EH	5	106	1	7.75	8.25	10.8968	161.093	291.93	111.112	21	0.396158	c.62.1.1	Integrin A (or I) domain	0.137339	Extracellular_processes	Cell adhesion	ABEV	high_disorder
DS.BN.4.136.1	BN	4	136	1	6.66667	5	6.42033	148.528	334.034	126.983	15.6667	0.340634	c.62.1.1	Integrin A (or I) domain	0.137339	Extracellular_processes	Cell adhesion	ABEV	high_disorder
DS.GE.0.1.9	GE	0	1	9	3	4.62069	3.2491	78.1189	139.421	95.7926	7.62069	0.931034	d.144.1.7	Protein kinases, catalytic subunit	0.137339	Regulation	Kinases and phosphatases and inhibitors	ABEV	high_disorder
DS.BK.5.41.1	BK	5	41	1	2	3	13.0282	37.1698	98.84	36.0618	10	1	d.127.1.1	Creatinase/aminopeptidase	0.137339	Intracellular_processes	Proteases, peptidases and their inhibitors	ABE	high_disorder
DS.BN.2.90.1	BN	2	90	1	4.66667	3	4.93167	139.368	163.391	78.4947	9.66667	0	d.127.1.1	Creatinase/aminopeptidase	0.137339	Intracellular_processes	Proteases, peptidases and their inhibitors	ABE	ordered
DS.BN.6.6.4	BN	6	6	4	6.33333	6.33333	5.21667	140.139	334.203	108.284	18.6667	0.550175	d.127.1.1	Creatinase/aminopeptidase	0.137339	Intracellular_processes	Proteases, peptidases and their inhibitors	ABE	high_disorder
DS.EG.4.44.1	EG	4	44	1	2	3	9.57733	58.168	19.8737	32.2427	9	1	d.127.1.1	Creatinase/aminopeptidase	0.137339	Intracellular_processes	Proteases, peptidases and their inhibitors	ABE	high_disorder
DS.EH.5.125.1	EH	5	125	1	8.66667	19.6667	11.4867	159.505	212.717	74.7623	33.3333	0.292229	d.127.1.1	Creatinase/aminopeptidase	0.137339	Intracellular_processes	Proteases, peptidases and their inhibitors	ABE	moderate_disorder
DS.HG.2.6.7	HG	2	6	7	15.6667	3	7.34633	92.3247	50.5003	114.709	20.6667	0.361098	d.127.1.1	Creatinase/aminopeptidase	0.137339	Intracellular_processes	Proteases, peptidases and their inhibitors	ABE	high_disorder
DS.GH.2.1.13	GH	2	1	13	3	9.3	8.7525	140.089	34.8366	95.1265	14.3	0.839476	d.144.1.7	Protein kinases, catalytic subunit	0.137339	Regulation	Kinases and phosphatases and inhibitors	ABEV	high_disorder
DS.EG.5.1.1	EG	5	1	1	2.08333	3	16.5846	125.078	350.739	28.7742	10.0833	1	d.144.1.7	Protein kinases, catalytic subunit	0.137339	Regulation	Kinases and phosphatases and inhibitors	ABEV	high_disorder
DS.HH.6.11.3	HH	6	11	3	22	14.3333	12.253	140.863	318.89	82.019	42.3333	0.221078	d.127.1.1	Creatinase/aminopeptidase	0.137339	Intracellular_processes	Proteases, peptidases and their inhibitors	ABE	moderate_disorder
DS.GH.0.1.67	GH	0	1	67	5.4	8.8	2.6375	36.1917	353.986	36.352	14.2	0.652227	c.62.1.1	Integrin A (or I) domain	0.137339	Extracellular_processes	Cell adhesion	ABEV	high_disorder
DS.GE.3.35.2	GE	3	35	2	3	7	7.474	82.548	30.107	48.515	13	0.666667	c.62.1.1	Integrin A (or I) domain	0.137339	Extracellular_processes	Cell adhesion	ABEV	high_disorder
DS.BN.10.8.1	BN	10	8	1	2	5	5.2685	161.162	24.9602	85.996	17	0.544118	c.1.8.1	Amylase, catalytic domain	0.141631	Metabolism	Carbohydrate transport and metabolism	ABEV	high_disorder
DS.GG.3.1.2	GG	3	1	2	3	3	6.559	105.416	86.1103	108.524	9	1	c.1.8.1	Amylase, catalytic domain	0.141631	Metabolism	Carbohydrate transport and metabolism	ABEV	high_disorder
DS.GH.2.17.1	GH	2	17	1	3	13	9.71967	24.4373	13.6688	97.0003	18	0.916667	c.1.8.1	Amylase, catalytic domain	0.141631	Metabolism	Carbohydrate transport and metabolism	ABEV	high_disorder
DS.HE.5.4.1	HE	5	4	1	12.75	4.66667	8.69892	145.973	57.2746	97.1874	22.4167	0.293791	c.1.8.1	Amylase, catalytic domain	0.141631	Metabolism	Carbohydrate transport and metabolism	ABEV	moderate_disorder
DS.HE.3.3.4	HE	3	3	4	12.8857	5.65714	7.12851	138.738	82.0716	100.435	21.5429	0.377652	c.1.8.1	Amylase, catalytic domain	0.141631	Metabolism	Carbohydrate transport and metabolism	ABEV	high_disorder
DS.EH.8.28.1	EH	8	28	1	3	7	15.5863	153.286	275.267	69.1127	18	0.296296	c.1.8.1	Amylase, catalytic domain	0.141631	Metabolism	Carbohydrate transport and metabolism	ABEV	moderate_disorder
DS.HG.7.2.1	HG	7	2	1	5	3	11.5687	149.982	336.782	69.4262	15	0.883333	c.1.8.1	Amylase, catalytic domain	0.141631	Metabolism	Carbohydrate transport and metabolism	ABEV	high_disorder
DS.HH.1.1.6	HH	1	1	6	9.05172	9.39655	4.39669	60.4881	68.3275	34.0412	19.4483	0.416596	c.1.8.1	Amylase, catalytic domain	0.141631	Metabolism	Carbohydrate transport and metabolism	ABEV	high_disorder
DS.EG.2.16.2	EG	2	16	2	6.75	3	6.57225	51.344	28.2533	71.9294	11.75	0.28125	c.66.1.41	UbiE/COQ5-like	0.141631	Metabolism	Transferases	ABEV	moderate_disorder
DS.HE.3.116.1	HE	3	116	1	4	3	11.3462	145.694	60.037	125.243	10	1	c.1.8.1	Amylase, catalytic domain	0.141631	Metabolism	Carbohydrate transport and metabolism	ABEV	high_disorder
DS.EH.8.22.1	EH	8	22	1	3	12.3333	18.8617	116.017	306.572	48.2523	23.3333	0.521135	c.1.8.1	Amylase, catalytic domain	0.141631	Metabolism	Carbohydrate transport and metabolism	ABEV	high_disorder
DS.EH.4.63.1	EH	4	63	1	5	9.6	11.376	145.312	8.034	61.5198	18.6	0.31207	c.1.8.1	Amylase, catalytic domain	0.141631	Metabolism	Carbohydrate transport and metabolism	ABEV	high_disorder
DS.EH.5.51.1	EH	5	51	1	2.83333	15.8333	13.3172	106.756	166.893	23.9098	23.6667	0.242168	c.1.8.1	Amylase, catalytic domain	0.141631	Metabolism	Carbohydrate transport and metabolism	ABEV	moderate_disorder
DS.BN.6.109.1	BN	6	109	1	4.33333	3	7.37967	96.8653	312.846	59.321	13.3333	1	c.1.8.1	Amylase, catalytic domain	0.141631	Metabolism	Carbohydrate transport and metabolism	ABEV	high_disorder
DS.EG.2.15.1	EG	2	15	1	4.21053	3	6.96526	35.3664	14.1414	34.0251	9.21053	0.947368	c.1.8.1	Amylase, catalytic domain	0.141631	Metabolism	Carbohydrate transport and metabolism	ABEV	high_disorder
DS.EG.2.18.1	EG	2	18	1	4.83333	3	4.69006	57.9187	118.724	65.7587	9.83333	1	c.1.8.1	Amylase, catalytic domain	0.141631	Metabolism	Carbohydrate transport and metabolism	ABEV	high_disorder
DS.EG.2.18.2	EG	2	18	2	4.57143	3	4.80686	68.6796	109.529	77.4439	9.57143	0.857143	c.1.8.1	Amylase, catalytic domain	0.141631	Metabolism	Carbohydrate transport and metabolism	ABEV	high_disorder
DS.EG.2.18.3	EG	2	18	3	5.25	3	5.167	41.1962	106.557	69.2627	10.25	1	c.1.8.1	Amylase, catalytic domain	0.141631	Metabolism	Carbohydrate transport and metabolism	ABEV	high_disorder
DS.EG.2.19.4	EG	2	19	4	4	3	6.312	42.0095	30.7275	40.1448	9	0.75	c.1.8.1	Amylase, catalytic domain	0.141631	Metabolism	Carbohydrate transport and metabolism	ABEV	high_disorder
DS.EH.1.1.47	EH	1	1	47	4.09091	4	7.24809	99.8645	352.055	27.3602	9.09091	0.909091	c.1.8.1	Amylase, catalytic domain	0.141631	Metabolism	Carbohydrate transport and metabolism	ABEV	high_disorder
DS.EH.6.40.1	EH	6	40	1	6	13	8.50075	77.6135	15.5702	84.9565	25	0.53766	c.1.8.1	Amylase, catalytic domain	0.141631	Metabolism	Carbohydrate transport and metabolism	ABEV	high_disorder
DS.HH.5.3.5	HH	5	3	5	16.5	9.75	10.3893	143.741	357.094	92.8598	31.25	0.248393	a.4.13.2	Sigma4 domain	0.141631	Regulation	Other regulatory function	ABEV	moderate_disorder
DS.HH.1.1.58	HH	1	1	58	8	9.08333	4.22283	36.7942	68.691	16.0296	18.0833	0.628466	a.177.1.1	Sigma2 domain of RNA polymerase sigma factors	0.141631	Other	Function unknown	BEV	high_disorder
DS.HG.4.51.1	HG	4	51	1	13.3333	3	8.798	99.8127	357.485	74.641	20.3333	0.442901	a.177.1.1	Sigma2 domain of RNA polymerase sigma factors	0.141631	Other	Function unknown	BEV	high_disorder
DS.BK.3.107.1	BK	3	107	1	4	2.25	11.306	8.2585	332.488	41.4218	9.25	0.75	c.1.8.1	Amylase, catalytic domain	0.141631	Metabolism	Carbohydrate transport and metabolism	ABEV	high_disorder
DS.EH.5.179.1	EH	5	179	1	5	8.33333	9.51633	173.714	140.884	85.0897	18.3333	0.455108	c.66.1.41	UbiE/COQ5-like	0.141631	Metabolism	Transferases	ABEV	high_disorder
DS.EH.2.7.13	EH	2	7	13	2.75	10.25	8.8275	33.915	161.159	36.039	15	0.427083	c.1.8.1	Amylase, catalytic domain	0.141631	Metabolism	Carbohydrate transport and metabolism	ABEV	high_disorder
DS.BK.3.130.1	BK	3	130	1	6	2.66667	10.3137	82.9093	55.736	9.52033	11.6667	0.717949	c.1.8.1	Amylase, catalytic domain	0.141631	Metabolism	Carbohydrate transport and metabolism	ABEV	high_disorder
DS.HH.5.10.5	HH	5	10	5	11.75	10.25	9.85425	139.745	8.17225	83.992	27	0.165515	a.4.13.2	Sigma4 domain	0.141631	Regulation	Other regulatory function	ABEV	moderate_disorder
DS.EH.5.2.9	EH	5	2	9	5	6.33333	9.65867	170.811	6.19167	94.923	16.3333	0.406863	c.66.1.41	UbiE/COQ5-like	0.141631	Metabolism	Transferases	ABEV	high_disorder
DS.HE.2.3.9	HE	2	3	9	9.5	10	5.3095	141.31	77.0323	83.2145	21.5	0.59375	c.51.1.1	Anticodon-binding domain of Class II aaRS	0.145923	Information	Translation, ribosomes, ribosome biogenesis; tRNA metabolism	ABEV	high_disorder
DS.HE.5.12.2	HE	5	12	2	12.5714	5.71429	7.64314	160.166	65.2251	106.805	23.2857	0.390831	c.51.1.1	Anticodon-binding domain of Class II aaRS	0.145923	Information	Translation, ribosomes, ribosome biogenesis; tRNA metabolism	ABEV	high_disorder
DS.HH.4.53.2	HH	4	53	2	11.6667	14.6667	10.3793	165.037	120.474	38.748	30.3333	0.373306	d.110.2.1	GAF domain	0.145923	Regulation	Signal transduction	ABEV	high_disorder
DS.HE.4.57.2	HE	4	57	2	9.5	3.75	10.4853	155.517	163.278	103.934	17.25	0.607721	c.26.2.4	Universal stress protein-like	0.145923	Metabolism	Nucleotide transport and metabolism	ABE	high_disorder
DS.BN.4.121.1	BN	4	121	1	4.33333	5	5.53367	165.58	345.644	62.041	13.3333	1	b.71.1.1	alpha-Amylases, C-terminal beta-sheet domain	0.145923	Metabolism	Polysaccharide metabolism	ABE	high_disorder
DS.BK.5.1.1	BK	5	1	1	8.03333	6.36667	8.7808	153.324	28.3503	82.001	19.4	0.53416	b.71.1.1	alpha-Amylases, C-terminal beta-sheet domain	0.145923	Metabolism	Polysaccharide metabolism	ABE	high_disorder
DS.EH.6.29.1	EH	6	29	1	6	10	10.249	125.786	3.125	96.1953	22	0.438045	d.58.17.1	HMA, heavy metal-associated domain	0.145923	Intracellular_processes	Inorganic ion transport and metabolism	ABE	high_disorder
DS.HE.4.11.11	HE	4	11	11	12.8	5.2	11.1646	174.295	295.333	120.001	22	0.577793	d.58.17.1	HMA, heavy metal-associated domain	0.145923	Intracellular_processes	Inorganic ion transport and metabolism	ABE	high_disorder
DS.HE.4.135.1	HE	4	135	1	16.4	6	6.968	127.304	141.655	40.3188	26.4	0.58012	d.58.17.1	HMA, heavy metal-associated domain	0.145923	Intracellular_processes	Inorganic ion transport and metabolism	ABE	high_disorder
DS.HE.5.17.3	HE	5	17	3	14.6	3.8	12.4002	147.223	65.6248	127.246	23.4	0.559649	d.58.17.1	HMA, heavy metal-associated domain	0.145923	Intracellular_processes	Inorganic ion transport and metabolism	ABE	high_disorder
DS.BN.4.13.2	BN	4	13	2	4.08	4.08	4.8064	128.213	342.509	107.187	12.16	0.767575	c.55.3.2	Retroviral integrase, catalytic domain	0.145923	Metabolism	Nucleotide transport and metabolism	ABEV	high_disorder
DS.EH.4.130.1	EH	4	130	1	7	11	10.597	152.838	3.52067	72.864	22	0.441946	c.55.3.2	Retroviral integrase, catalytic domain	0.145923	Metabolism	Nucleotide transport and metabolism	ABEV	high_disorder
DS.GH.3.4.1	GH	3	4	1	3	12	10.4027	97.3516	342.275	111.264	18	0.589085	c.55.3.2	Retroviral integrase, catalytic domain	0.145923	Metabolism	Nucleotide transport and metabolism	ABEV	high_disorder
DS.HE.3.1.22	HE	3	1	22	8	3.66667	8.423	143.805	95.276	97.094	14.6667	0.392157	c.55.3.2	Retroviral integrase, catalytic domain	0.145923	Metabolism	Nucleotide transport and metabolism	ABEV	high_disorder
DS.HH.3.7.7	HH	3	7	7	8	11.1667	7.6365	62.565	237.831	18.1933	22.1667	0.56183	c.26.2.4	Universal stress protein-like	0.145923	Metabolism	Nucleotide transport and metabolism	ABE	high_disorder
DS.GH.2.2.16	GH	2	2	16	3	8	8.69514	85.746	31.2021	96.274	13	1	d.110.2.1	GAF domain	0.145923	Regulation	Signal transduction	ABEV	high_disorder
DS.HE.3.11.2	HE	3	11	2	13.6897	4.13793	10.6497	146.181	30.7891	130.749	20.8276	0.40663	d.110.2.1	GAF domain	0.145923	Regulation	Signal transduction	ABEV	high_disorder
DS.EH.7.46.1	EH	7	46	1	9.66667	17.6667	15.1233	146.415	308.514	112.594	34.3333	0.145524	d.110.2.1	GAF domain	0.145923	Regulation	Signal transduction	ABEV	moderate_disorder
DS.HH.5.65.1	HH	5	65	1	10.75	16.25	12.5392	146.767	339.298	53.455	32	0.334452	d.110.2.1	GAF domain	0.145923	Regulation	Signal transduction	ABEV	high_disorder
DS.HG.4.48.1	HG	4	48	1	5	3.33333	10.1433	98.63	341.485	39.639	12.3333	0.722222	d.110.3.2	Heme-binding PAS domain	0.145923	Regulation	Signal transduction	ABE	high_disorder
DS.EH.2.1.58	EH	2	1	58	5.42857	13.4286	7.59229	99.5486	33.8301	24.9514	20.8571	0.425884	a.4.5.5	ArsR-like transcriptional regulators	0.145923	Regulation	DNA-binding (transcription factors)	ABEV	high_disorder
DS.EH.2.20.6	EH	2	20	6	6.66667	9.66667	8.574	114.363	343.482	73.8647	18.3333	0.733333	c.26.2.4	Universal stress protein-like	0.145923	Metabolism	Nucleotide transport and metabolism	ABE	high_disorder
DS.EG.2.10.4	EG	2	10	4	6	3	9.39667	98.0162	4.289	49.259	11	0.833333	c.26.2.4	Universal stress protein-like	0.145923	Metabolism	Nucleotide transport and metabolism	ABE	high_disorder
DS.HE.3.7.2	HE	3	7	2	15.2432	5.56757	10.5802	141.708	350.733	121.686	23.8108	0.358192	d.110.2.1	GAF domain	0.145923	Regulation	Signal transduction	ABEV	high_disorder
DS.HH.1.1.195	HH	1	1	195	6.66667	7.66667	3.768	54.8437	110.662	50.3347	15.3333	0.5671	d.110.2.1	GAF domain	0.145923	Regulation	Signal transduction	ABEV	high_disorder
DS.EH.3.34.3	EH	3	34	3	4.33333	10	6.687	105.478	83.3153	58.2113	17.3333	0.212302	c.51.1.1	Anticodon-binding domain of Class II aaRS	0.145923	Information	Translation, ribosomes, ribosome biogenesis; tRNA metabolism	ABEV	moderate_disorder
DS.HG.0.1.96	HG	0	1	96	11.7143	4	2.31986	13.8843	143.551	58.8203	15.7143	0.519424	c.51.1.1	Anticodon-binding domain of Class II aaRS	0.145923	Information	Translation, ribosomes, ribosome biogenesis; tRNA metabolism	ABEV	high_disorder
DS.EH.1.11.3	EH	1	11	3	3.5	10.6667	5.8615	84.7808	166.299	24.5323	15.1667	0.556005	c.51.1.1	Anticodon-binding domain of Class II aaRS	0.145923	Information	Translation, ribosomes, ribosome biogenesis; tRNA metabolism	ABEV	high_disorder
DS.HE.4.59.4	HE	4	59	4	5.33333	5.33333	9.396	112.557	155.499	96.244	14.6667	0.875	c.46.1.3	Single-domain sulfurtransferase	0.150215	Intracellular_processes	Cell devision and chromsome partitioning, cell cycle	ABEV	high_disorder
DS.BK.3.81.1	BK	3	81	1	2.5	2.33333	7.778	129.965	67.177	82.7268	7.83333	1	c.46.1.3	Single-domain sulfurtransferase	0.150215	Intracellular_processes	Cell devision and chromsome partitioning, cell cycle	ABEV	high_disorder
DS.EG.2.1.17	EG	2	1	17	6.125	3	7.722	111.193	345.641	72.595	11.125	0.845513	d.153.1.1	Class II glutamine amidotransferases	0.150215	Metabolism	Other enzymes	ABEV	high_disorder
DS.EH.2.42.2	EH	2	42	2	6	6	10.274	74.5693	207.518	12.6337	14	0.175439	d.32.1.2	Antibiotic resistance proteins	0.150215	Metabolism	Oxidation/Reduction	ABEV	moderate_disorder
DS.EH.2.62.1	EH	2	62	1	4.75	9	7.71475	101.474	30.995	64.7763	15.75	0.558824	d.32.1.2	Antibiotic resistance proteins	0.150215	Metabolism	Oxidation/Reduction	ABEV	high_disorder
DS.EH.5.131.1	EH	5	131	1	9.66667	9	14.3257	125.18	8.01867	97.808	23.6667	0.368839	d.81.1.1	GAPDH-like	0.150215	Metabolism	Energy production and conversion	ABEV	high_disorder
DS.EG.1.2.52	EG	1	2	52	6	3.66667	6.70667	94.6243	100.073	19.041	10.6667	0.688889	d.81.1.1	GAPDH-like	0.150215	Metabolism	Energy production and conversion	ABEV	high_disorder
DS.BN.3.57.1	BN	3	57	1	4.66667	7	5.02533	172.672	263.958	99.477	14.6667	0.740741	d.81.1.1	GAPDH-like	0.150215	Metabolism	Energy production and conversion	ABEV	high_disorder
DS.BN.2.10.42	BN	2	10	42	6.33333	6.33333	4.64033	176.295	106.081	101.054	14.6667	0.34127	d.32.1.2	Antibiotic resistance proteins	0.150215	Metabolism	Oxidation/Reduction	ABEV	high_disorder
DS.HE.5.168.1	HE	5	168	1	7.66667	4	15.1077	143.007	281.906	130.802	16.6667	0.833333	d.32.1.2	Antibiotic resistance proteins	0.150215	Metabolism	Oxidation/Reduction	ABEV	high_disorder
DS.HE.3.166.1	HE	3	166	1	10.6667	2.66667	6.525	126.541	186.231	68.1023	16.3333	0.556373	d.81.1.1	GAPDH-like	0.150215	Metabolism	Energy production and conversion	ABEV	high_disorder
DS.HE.4.182.1	HE	4	182	1	13.75	9.5	6.54325	130.083	38.5913	79.0948	27.25	0.377496	d.79.4.1	PurM N-terminal domain-like	0.154506	Metabolism	Other enzymes	ABEV	high_disorder
DS.EH.3.108.1	EH	3	108	1	2.33333	4.66667	10.889	61.0227	155.237	33.8953	10	1	a.100.1.3	HCDH C-domain-like	0.154506	Metabolism	Energy production and conversion	ABE	high_disorder
DS.HH.3.32.2	HH	3	32	2	11.6667	10	12.2893	79.6057	24.0177	113.083	24.6667	0.621528	a.35.1.2	Phage repressors	0.154506	Regulation	DNA-binding (transcription factors)	ABEV	high_disorder
DS.BK.20.1.1	BK	20	1	1	6	2.33333	17.2013	123.432	355.256	124.832	28.3333	0.341133	c.73.1.3	PyrH-like	0.154506	Metabolism	Amino acid transport and metabolism	ABE	high_disorder
DS.GH.2.2.12	GH	2	2	12	3	14.2	9.6001	110.553	28.2755	99.039	19.2	0.714712	a.6.1.3	DNA-binding N-terminal domain of transcription activators	0.154506	Regulation	DNA-binding (transcription factors)	ABEV	high_disorder
DS.HE.4.114.1	HE	4	114	1	11.6667	6.33333	6.39533	131.254	56.4765	80.7622	22	0.502655	d.79.4.1	PurM N-terminal domain-like	0.154506	Metabolism	Other enzymes	ABEV	high_disorder
DS.HH.2.11.2	HH	2	11	2	11	6.5	6.9995	94.9244	288.083	20.3791	19.5	0.299733	d.79.4.1	PurM N-terminal domain-like	0.154506	Metabolism	Other enzymes	ABEV	moderate_disorder
DS.HE.4.152.1	HE	4	152	1	13.5	5	14.8375	146.321	54.8813	140.227	22.5	0.567584	d.139.1.1	PurM C-terminal domain-like	0.154506	Metabolism	Other enzymes	ABEV	high_disorder
DS.EG.2.5.10	EG	2	5	10	7.33333	3	9.478	64.2347	352.73	48.399	12.3333	1	d.79.4.1	PurM N-terminal domain-like	0.154506	Metabolism	Other enzymes	ABEV	high_disorder
DS.EH.1.4.4	EH	1	4	4	2.94118	7.41176	3.67312	98.5499	155.71	52.4289	11.3529	0.495098	c.14.1.3	Crotonase-like	0.158798	Intracellular_processes	Proteases, peptidases and their inhibitors	ABEV	high_disorder
DS.EH.1.4.9	EH	1	4	9	3.125	8	3.60787	91.6128	159.354	52.6623	12.125	0.342147	c.14.1.3	Crotonase-like	0.158798	Intracellular_processes	Proteases, peptidases and their inhibitors	ABEV	high_disorder
DS.GH.5.3.1	GH	5	3	1	3	15.1429	13.1071	138.581	143.556	83.8727	23.1429	0.76118	c.14.1.3	Crotonase-like	0.158798	Intracellular_processes	Proteases, peptidases and their inhibitors	ABEV	high_disorder
DS.HE.2.2.6	HE	2	2	6	7.88235	4.70588	6.52682	125.901	104.635	53.0317	14.5882	0.186924	c.14.1.3	Crotonase-like	0.158798	Intracellular_processes	Proteases, peptidases and their inhibitors	ABEV	moderate_disorder
DS.HE.4.60.1	HE	4	60	1	18.8571	5	8.75657	122.299	114.852	74.4917	27.8571	0.240276	c.14.1.3	Crotonase-like	0.158798	Intracellular_processes	Proteases, peptidases and their inhibitors	ABEV	moderate_disorder
DS.HE.5.111.1	HE	5	111	1	19	5	8.618	113.472	98.6967	42.6778	29	0.258621	c.14.1.3	Crotonase-like	0.158798	Intracellular_processes	Proteases, peptidases and their inhibitors	ABEV	moderate_disorder
DS.HH.3.2.6	HH	3	2	6	13.5	14.6111	9.44411	102.415	28.4263	26.6879	31.1111	0.327186	c.14.1.3	Crotonase-like	0.158798	Intracellular_processes	Proteases, peptidases and their inhibitors	ABEV	high_disorder
DS.BK.3.9.1	BK	3	9	1	4.45	3.15	8.8356	111.66	79.4158	67.5221	10.6	0.95	c.14.1.3	Crotonase-like	0.158798	Intracellular_processes	Proteases, peptidases and their inhibitors	ABEV	high_disorder
DS.BK.2.26.1	BK	2	26	1	5.91667	4.33333	7.548	118.965	94.6615	49.5358	12.25	0.431818	c.14.1.3	Crotonase-like	0.158798	Intracellular_processes	Proteases, peptidases and their inhibitors	ABEV	high_disorder
DS.BK.2.17.1	BK	2	17	1	5.15385	3	7.64769	129.129	98.8245	50.8396	10.1538	0.538462	c.14.1.3	Crotonase-like	0.158798	Intracellular_processes	Proteases, peptidases and their inhibitors	ABEV	high_disorder
DS.EH.1.4.25	EH	1	4	25	2.5	5	4.28075	88.4702	172.571	58.4445	8.5	0.791667	c.14.1.3	Crotonase-like	0.158798	Intracellular_processes	Proteases, peptidases and their inhibitors	ABEV	high_disorder
DS.HE.5.1.2	HE	5	1	2	6.34615	2.84615	8.94362	156.626	168.617	113.813	14.1923	0.711202	c.14.1.3	Crotonase-like	0.158798	Intracellular_processes	Proteases, peptidases and their inhibitors	ABEV	high_disorder
DS.EG.2.20.1	EG	2	20	1	3.35714	3.85714	8.92093	73.4026	78.5136	20.6124	9.21429	0.791667	c.14.1.3	Crotonase-like	0.158798	Intracellular_processes	Proteases, peptidases and their inhibitors	ABEV	high_disorder
DS.EH.0.1.13	EH	0	1	13	4.48333	9.1	3.17283	94.8971	126.336	13.9972	13.5833	0.656788	c.55.1.10	ROK	0.158798	Metabolism	Other enzymes	ABEV	high_disorder
DS.BN.3.16.1	BN	3	16	1	6.21429	6.85714	5.00557	160.18	340.731	97.6142	16.0714	0.358579	c.55.1.10	ROK	0.158798	Metabolism	Other enzymes	ABEV	high_disorder
DS.HE.3.20.11	HE	3	20	11	24.5	3.25	7.85075	49.9457	120.452	21.6397	30.75	0.344841	a.29.3.1	Medium chain acyl-CoA dehydrogenase-like, C-terminal domain	0.16309	Metabolism	Electron transfer/transport	ABE	high_disorder
DS.BK.5.37.1	BK	5	37	1	6.4	4.2	8.656	62.7094	183.472	61.6696	15.6	0.7375	e.6.1.1	Medium chain acyl-CoA dehydrogenase, NM (N-terminal and middle) domains	0.16309	Metabolism	Coenzyme metabolism	ABE	high_disorder
DS.BK.6.12.1	BK	6	12	1	12	7.71429	10.4939	146.731	14.2504	60.4774	25.7143	0.201902	e.6.1.1	Medium chain acyl-CoA dehydrogenase, NM (N-terminal and middle) domains	0.16309	Metabolism	Coenzyme metabolism	ABE	moderate_disorder
DS.GE.3.26.1	GE	3	26	1	3	4.5	11.0805	77.6003	130.212	74.454	10.5	1	e.6.1.1	Medium chain acyl-CoA dehydrogenase, NM (N-terminal and middle) domains	0.16309	Metabolism	Coenzyme metabolism	ABE	high_disorder
DS.GH.6.1.1	GH	6	1	1	3	12.6	18.8294	73.1328	149.903	138.617	21.6	0.428302	e.6.1.1	Medium chain acyl-CoA dehydrogenase, NM (N-terminal and middle) domains	0.16309	Metabolism	Coenzyme metabolism	ABE	high_disorder
DS.BN.3.57.2	BN	3	57	2	6	6.33333	4.79067	155.54	329.978	88.869	15.3333	0.816667	a.4.6.1	PhoB-like	0.16309	Regulation	DNA-binding (transcription factors)	BEV	high_disorder
DS.GE.0.4.4	GE	0	4	4	4.5	5.75	2.84525	37.3945	171.326	59.5433	10.25	0.75	a.4.6.1	PhoB-like	0.16309	Regulation	DNA-binding (transcription factors)	BEV	high_disorder
DS.BN.2.7.3	BN	2	7	3	4.61404	3.31579	4.79775	121.837	340.293	105.156	9.92982	0.89756	a.29.3.1	Medium chain acyl-CoA dehydrogenase-like, C-terminal domain	0.16309	Metabolism	Electron transfer/transport	ABE	high_disorder
DS.GH.1.1.58	GH	1	1	58	3	20.6667	5.893	96.6307	188.807	86.605	24.6667	0.514141	a.29.3.1	Medium chain acyl-CoA dehydrogenase-like, C-terminal domain	0.16309	Metabolism	Electron transfer/transport	ABE	high_disorder
DS.GH.5.17.1	GH	5	17	1	4	14	7.266	23.568	309.1	36.7497	23	0.318676	a.29.3.1	Medium chain acyl-CoA dehydrogenase-like, C-terminal domain	0.16309	Metabolism	Electron transfer/transport	ABE	high_disorder
DS.GH.5.6.1	GH	5	6	1	5	10	6.186	58.2146	148.291	63.1704	20	0.518295	a.29.3.1	Medium chain acyl-CoA dehydrogenase-like, C-terminal domain	0.16309	Metabolism	Electron transfer/transport	ABE	high_disorder
DS.HH.4.26.2	HH	4	26	2	17	7	9.46933	53.4257	36.128	59.544	28	0.535714	e.6.1.1	Medium chain acyl-CoA dehydrogenase, NM (N-terminal and middle) domains	0.16309	Metabolism	Coenzyme metabolism	ABE	high_disorder
DS.HE.5.6.4	HE	5	6	4	11	5.25	9.39025	144.21	30.7752	77.4273	21.25	0.193635	c.26.1.3	Adenylyltransferase	0.16309	Metabolism	Nucleotide transport and metabolism	ABEV	moderate_disorder
DS.HG.0.2.23	HG	0	2	23	26	5	3.76633	124.281	47.5387	53.0727	31	0.204301	a.29.3.1	Medium chain acyl-CoA dehydrogenase-like, C-terminal domain	0.16309	Metabolism	Electron transfer/transport	ABE	moderate_disorder
DS.HG.1.7.2	HG	1	7	2	23.4	4.8	5.2488	127.598	75.989	30.8256	29.2	0.29422	a.29.3.1	Medium chain acyl-CoA dehydrogenase-like, C-terminal domain	0.16309	Metabolism	Electron transfer/transport	ABE	moderate_disorder
DS.EH.2.1.25	EH	2	1	25	5.68421	10.4211	8.49426	150.109	97.4885	50.5072	18.1053	0.441572	d.14.1.10	ATP-dependent protease Lon (La), catalytic domain	0.16309	Information	Translation, ribosomes, ribosome biogenesis; tRNA metabolism	ABEV	high_disorder
DS.BK.5.121.1	BK	5	121	1	7	4	9.12967	66.5023	175.554	61.3233	16	0.822222	e.6.1.1	Medium chain acyl-CoA dehydrogenase, NM (N-terminal and middle) domains	0.16309	Metabolism	Coenzyme metabolism	ABE	high_disorder
DS.HH.10.8.1	HH	10	8	1	9	9.66667	17.378	49.3427	231.044	110.874	28.6667	0.323481	c.26.1.3	Adenylyltransferase	0.16309	Metabolism	Nucleotide transport and metabolism	ABEV	high_disorder
DS.HH.4.37.1	HH	4	37	1	14.4	10.7	12.6236	62.408	347.505	124.662	29.1	0.374077	a.4.6.2	GerE-like (LuxR/UhpA family of transcriptional regulators)	0.167382	Regulation	DNA-binding (transcription factors)	ABEV	high_disorder
DS.HH.5.15.3	HH	5	15	3	10.3333	8.66667	12.6583	64.554	349.908	114.252	24	0.528553	a.4.6.2	GerE-like (LuxR/UhpA family of transcriptional regulators)	0.167382	Regulation	DNA-binding (transcription factors)	ABEV	high_disorder
DS.HH.5.22.4	HH	5	22	4	14	10.3333	11.8437	65.484	347.369	113.107	29.3333	0.37318	a.4.6.2	GerE-like (LuxR/UhpA family of transcriptional regulators)	0.167382	Regulation	DNA-binding (transcription factors)	ABEV	high_disorder
DS.HE.4.52.1	HE	4	52	1	10.8333	6	10.5475	140.668	98.1048	103.13	20.8333	0.279904	c.116.1.1	SpoU-like RNA 2'-O ribose methyltransferase	0.171674	Other	Function unknown	ABE	moderate_disorder
DS.HE.3.16.2	HE	3	16	2	8	4.90909	7.69982	112.551	83.8304	34.688	15.9091	0.700905	c.116.1.1	SpoU-like RNA 2'-O ribose methyltransferase	0.171674	Other	Function unknown	ABE	high_disorder
DS.EH.4.146.1	EH	4	146	1	5.33333	10.6667	12.448	156.474	321.757	74.7637	20	0.249871	c.116.1.1	SpoU-like RNA 2'-O ribose methyltransferase	0.171674	Other	Function unknown	ABE	moderate_disorder
DS.EH.4.104.1	EH	4	104	1	6.5	12.75	12.3645	165.524	305.034	78.5853	23.25	0.422454	c.116.1.1	SpoU-like RNA 2'-O ribose methyltransferase	0.171674	Other	Function unknown	ABE	high_disorder
DS.EH.7.23.1	EH	7	23	1	6.25	10.75	14.7425	147.738	298.377	108.341	24	0.225694	c.68.1.13	Cytidylytransferase	0.175966	Metabolism	Transferases	ABEV	moderate_disorder
DS.HE.3.4.28	HE	3	4	28	9.33333	4.33333	6.049	85.5817	141.675	81.7783	16.6667	0.737745	c.68.1.13	Cytidylytransferase	0.175966	Metabolism	Transferases	ABEV	high_disorder
DS.EH.4.31.2	EH	4	31	2	4.66667	10	11.2863	142.659	342.672	47.6167	18.6667	0.571429	c.68.1.13	Cytidylytransferase	0.175966	Metabolism	Transferases	ABEV	high_disorder
DS.EH.2.2.24	EH	2	2	24	3.66667	8	9.76567	118.044	58.4983	20.459	13.6667	0.565527	c.68.1.13	Cytidylytransferase	0.175966	Metabolism	Transferases	ABEV	high_disorder
DS.EH.0.1.23	EH	0	1	23	5.65116	7.30233	3.08309	81.1282	9.35421	7.86002	12.9535	0.628318	c.68.1.13	Cytidylytransferase	0.175966	Metabolism	Transferases	ABEV	high_disorder
DS.BN.2.93.1	BN	2	93	1	7	8.33333	5.67967	168.044	193.969	75.9757	17.3333	0.697262	a.4.5.6	GntR-like transcriptional regulators	0.175966	Regulation	DNA-binding (transcription factors)	ABEV	high_disorder
DS.HG.2.1.33	HG	2	1	33	6	3	5.25933	75.1227	138.143	31.7267	11	0.711111	c.68.1.13	Cytidylytransferase	0.175966	Metabolism	Transferases	ABEV	high_disorder
DS.HE.3.11.12	HE	3	11	12	16.3333	5.33333	12.4273	167.678	358.478	138.502	24.6667	0.52912	c.48.1.2	Branched-chain alpha-keto acid dehydrogenase beta-subunit, C-terminal-domain	0.175966	Metabolism	Transferases	ABE	high_disorder
DS.BN.2.4.3	BN	2	4	3	5.925	6.075	4.9161	131.677	334.492	101.036	14	0.666229	a.4.5.37	LysR-like transcriptional regulators	0.175966	Regulation	DNA-binding (transcription factors)	ABEV	high_disorder
DS.GH.2.6.6	GH	2	6	6	3	8.33333	7.764	70.0323	128.325	75.188	13.3333	0.447863	a.127.1.1	L-aspartase/fumarase	0.175966	Metabolism	Amino acid transport and metabolism	ABEV	high_disorder
DS.EH.2.1.10	EH	2	1	10	5.08889	11.3333	8.37549	157.956	103.237	55.9997	18.4222	0.565913	c.1.6.1	Alanine racemase-like, N-terminal domain	0.175966	Metabolism	Amino acid transport and metabolism	ABEV	high_disorder
DS.HH.5.1.26	HH	5	1	26	18.3333	13.3333	8.45667	167.959	169.053	94.8467	36.6667	0.207925	a.127.1.1	L-aspartase/fumarase	0.175966	Metabolism	Amino acid transport and metabolism	ABEV	moderate_disorder
DS.HE.7.46.1	HE	7	46	1	27	2	6.88533	114.2	165.79	77.759	36	0.212963	a.127.1.1	L-aspartase/fumarase	0.175966	Metabolism	Amino acid transport and metabolism	ABEV	moderate_disorder
DS.HE.4.79.1	HE	4	79	1	27.4286	5.42857	10.9783	104.776	97.6339	56.7081	36.8571	0.295664	a.127.1.1	L-aspartase/fumarase	0.175966	Metabolism	Amino acid transport and metabolism	ABEV	moderate_disorder
DS.GE.3.51.1	GE	3	51	1	3	2.5	8.5095	97.2163	5.142	69.4813	8.5	1	c.1.6.1	Alanine racemase-like, N-terminal domain	0.175966	Metabolism	Amino acid transport and metabolism	ABEV	high_disorder
DS.GH.3.8.5	GH	3	8	5	3	9	12.0857	121.085	344.28	108.607	15	0.755556	c.1.6.1	Alanine racemase-like, N-terminal domain	0.175966	Metabolism	Amino acid transport and metabolism	ABEV	high_disorder
DS.HE.3.30.1	HE	3	30	1	13.3077	6.92308	6.77008	128.613	170.235	79.5673	23.2308	0.380598	c.1.6.1	Alanine racemase-like, N-terminal domain	0.175966	Metabolism	Amino acid transport and metabolism	ABEV	high_disorder
DS.HE.4.31.3	HE	4	31	3	10	3.66667	9.48633	150.973	102.732	93.0513	17.6667	0.502206	c.1.6.1	Alanine racemase-like, N-terminal domain	0.175966	Metabolism	Amino acid transport and metabolism	ABEV	high_disorder
DS.HE.6.15.2	HE	6	15	2	15.3333	4.33333	13.4913	162.985	304.899	114.494	25.6667	0.211195	c.1.6.1	Alanine racemase-like, N-terminal domain	0.175966	Metabolism	Amino acid transport and metabolism	ABEV	moderate_disorder
DS.HG.4.9.3	HG	4	9	3	8.5	3	10.435	114.965	12.0735	85.4273	15.5	0.75	c.1.6.1	Alanine racemase-like, N-terminal domain	0.175966	Metabolism	Amino acid transport and metabolism	ABEV	high_disorder
DS.BK.2.1.22	BK	2	1	22	4	4.16667	9.6515	23.9208	85.1967	13.4228	10.1667	1	b.36.1.4	HtrA-like serine proteases	0.175966	Regulation	Signal transduction	ABEV	high_disorder
DS.EH.3.121.1	EH	3	121	1	3	11	10.813	122.834	121.11	92.7733	17	0.686275	c.48.1.2	Branched-chain alpha-keto acid dehydrogenase beta-subunit, C-terminal-domain	0.175966	Metabolism	Transferases	ABE	high_disorder
DS.EH.3.36.1	EH	3	36	1	4.6	13.2	6.772	154.243	82.9118	65.9918	20.8	0.338475	c.48.1.2	Branched-chain alpha-keto acid dehydrogenase beta-subunit, C-terminal-domain	0.175966	Metabolism	Transferases	ABE	high_disorder
DS.GH.3.33.1	GH	3	33	1	3.33333	11.3333	9.33233	72.5937	80.1387	74.1957	17.6667	0.855072	a.127.1.1	L-aspartase/fumarase	0.175966	Metabolism	Amino acid transport and metabolism	ABEV	high_disorder
DS.HE.6.33.1	HE	6	33	1	5	4.75	13.488	93.361	14.1025	96.7933	15.75	0.75	b.36.1.4	HtrA-like serine proteases	0.175966	Regulation	Signal transduction	ABEV	high_disorder
DS.BN.2.2.35	BN	2	2	35	8.64286	7.57143	4.92707	150.379	333.261	95.1213	18.2143	0.573385	b.36.1.4	HtrA-like serine proteases	0.175966	Regulation	Signal transduction	ABEV	high_disorder
DS.BN.2.17.1	BN	2	17	1	6.3	5.6	4.9533	139.952	332.954	97.1646	13.9	0.647069	b.36.1.4	HtrA-like serine proteases	0.175966	Regulation	Signal transduction	ABEV	high_disorder
DS.HG.1.8.1	HG	1	8	1	6.33333	3	7.25044	70.3853	323.867	72.6619	10.3333	1	d.52.3.1	Prokaryotic type KH domain (KH-domain type II)	0.180258	Information	Translation, ribosomes, ribosome biogenesis; tRNA metabolism	ABE	high_disorder
DS.HG.1.12.1	HG	1	12	1	5.75	3	6.99925	63.2405	307.532	68.484	9.75	1	d.52.3.1	Prokaryotic type KH domain (KH-domain type II)	0.180258	Information	Translation, ribosomes, ribosome biogenesis; tRNA metabolism	ABE	high_disorder
DS.HE.4.266.1	HE	4	266	1	11.3333	5	8.78533	155.052	28.6547	114.644	20.3333	0.386095	d.52.3.1	Prokaryotic type KH domain (KH-domain type II)	0.180258	Information	Translation, ribosomes, ribosome biogenesis; tRNA metabolism	ABE	high_disorder
DS.GH.0.2.1	GH	0	2	1	3	12.7727	3.78309	34.7369	75.6615	99.4795	15.7727	0.75084	d.52.3.1	Prokaryotic type KH domain (KH-domain type II)	0.180258	Information	Translation, ribosomes, ribosome biogenesis; tRNA metabolism	ABE	high_disorder
DS.HH.3.6.10	HH	3	6	10	10.8333	13	7.6965	143.504	149.194	54.514	26.8333	0.487325	a.121.1.1	Tetracyclin repressor-like, C-terminal domain	0.180258	Information	Transcription	ABE	high_disorder
DS.HG.4.2.10	HG	4	2	10	10.6667	4	10.219	99.4427	8.20933	128.888	18.6667	0.585098	a.4.1.9	Tetracyclin repressor-like, N-terminal domain	0.180258	Regulation	DNA-binding (transcription factors)	ABEV	high_disorder
DS.HH.5.8.2	HH	5	8	2	5	18.5	10.8029	60.6725	345.891	70.427	28.5	0.316858	a.4.1.9	Tetracyclin repressor-like, N-terminal domain	0.180258	Regulation	DNA-binding (transcription factors)	ABEV	high_disorder
DS.HH.5.61.1	HH	5	61	1	29.25	24.75	10.1608	162.686	201.838	69.1945	59	0.137676	a.25.1.1	Ferritin	0.180258	Intracellular_processes	Inorganic ion transport and metabolism	ABEV	moderate_disorder
DS.HH.8.3.1	HH	8	3	1	24	7	20.4805	85.5182	343.559	123.916	39	0.266796	a.25.1.1	Ferritin	0.180258	Intracellular_processes	Inorganic ion transport and metabolism	ABEV	moderate_disorder
DS.HH.6.4.1	HH	6	4	1	17.8889	8.27778	13.4676	119.889	324.703	122.096	32.1667	0.336796	a.4.1.9	Tetracyclin repressor-like, N-terminal domain	0.180258	Regulation	DNA-binding (transcription factors)	ABEV	high_disorder
DS.HH.6.3.1	HH	6	3	1	18.0455	7.72727	14.4777	111.902	324.022	125.973	31.7727	0.392047	a.4.1.9	Tetracyclin repressor-like, N-terminal domain	0.180258	Regulation	DNA-binding (transcription factors)	ABEV	high_disorder
DS.HH.5.8.5	HH	5	8	5	4.66667	22.3333	11.0743	63.011	343.444	54.553	32	0.285354	a.4.1.9	Tetracyclin repressor-like, N-terminal domain	0.180258	Regulation	DNA-binding (transcription factors)	ABEV	moderate_disorder
DS.EH.2.1.84	EH	2	1	84	5.66667	7	8.411	151.588	112.928	67.5597	14.6667	0.833333	d.265.1.3	Pseudouridine synthase RsuA/RluD	0.180258	Metabolism	Nucleotide transport and metabolism	ABE	high_disorder
DS.GH.2.3.3	GH	2	3	3	3.33333	11.1429	8.54543	81.2499	13.7393	55.7701	16.4762	0.714205	a.4.1.9	Tetracyclin repressor-like, N-terminal domain	0.180258	Regulation	DNA-binding (transcription factors)	ABEV	high_disorder
DS.GH.4.39.1	GH	4	39	1	6	20.6667	11.0463	64.2163	5.87233	94.393	30.6667	0.276001	a.4.1.9	Tetracyclin repressor-like, N-terminal domain	0.180258	Regulation	DNA-binding (transcription factors)	ABEV	moderate_disorder
DS.HH.1.1.42	HH	1	1	42	9.64706	9.23529	4.15053	34.8834	61.9856	80.0682	19.8824	0.446307	a.25.1.1	Ferritin	0.180258	Intracellular_processes	Inorganic ion transport and metabolism	ABEV	high_disorder
DS.BN.2.2.38	BN	2	2	38	7.30769	5.69231	4.59285	161.997	6.20108	93.914	15	0.615422	d.265.1.3	Pseudouridine synthase RsuA/RluD	0.180258	Metabolism	Nucleotide transport and metabolism	ABE	high_disorder
DS.HE.6.100.1	HE	6	100	1	8	6.33333	12.625	124.845	326.339	123.618	20.3333	0.488744	d.52.3.1	Prokaryotic type KH domain (KH-domain type II)	0.180258	Information	Translation, ribosomes, ribosome biogenesis; tRNA metabolism	ABE	high_disorder
DS.EH.6.64.1	EH	6	64	1	7.25	8.25	11.4855	128.981	17.2518	65.9052	21.5	0.345924	e.11.1.1	Type II DNA topoisomerase	0.180258	Information	DNA replication, recombination, repair	ABEV	high_disorder
DS.HG.0.1.187	HG	0	1	187	7.66667	4.33333	2.52567	17.7003	95.5907	23.9167	12	0.692308	c.72.2.1	MurCDEF	0.184549	Intracellular_processes	Proteases, peptidases and their inhibitors	ABE	high_disorder
DS.EH.3.3.2	EH	3	3	2	5.36364	11.8182	9.43155	161.688	170.032	62.9345	20.1818	0.275183	c.2.1.9	Potassium channel NAD-binding domain	0.184549	General	Small molecule binding	ABE	moderate_disorder
DS.EH.5.150.1	EH	5	150	1	4	8.66667	9.36967	154.029	30.7947	82.344	17.6667	0.256944	c.2.1.9	Potassium channel NAD-binding domain	0.184549	General	Small molecule binding	ABE	moderate_disorder
DS.EH.5.3.4	EH	5	3	4	5	8.75	11.342	155.803	330.657	64.1338	18.75	0.373958	c.2.1.9	Potassium channel NAD-binding domain	0.184549	General	Small molecule binding	ABE	high_disorder
DS.EH.5.9.3	EH	5	9	3	4.5	10	12.3978	167.921	9.154	53.199	19.5	0.616667	c.2.1.9	Potassium channel NAD-binding domain	0.184549	General	Small molecule binding	ABE	high_disorder
DS.HE.5.36.3	HE	5	36	3	12	4.66667	9.562	165.697	193.05	117.521	21.6667	0.306685	c.2.1.9	Potassium channel NAD-binding domain	0.184549	General	Small molecule binding	ABE	high_disorder
DS.HE.5.11.5	HE	5	11	5	13	4	11.6137	160.245	166.035	124.561	22	0.428054	c.2.1.9	Potassium channel NAD-binding domain	0.184549	General	Small molecule binding	ABE	high_disorder
DS.HE.6.99.1	HE	6	99	1	8	9	12.7703	102.051	354.435	137.256	23	0.376812	d.90.1.1	NADH oxidase/flavin reductase	0.184549	Metabolism	Electron transfer/transport	ABE	high_disorder
DS.HE.4.30.3	HE	4	30	3	10.6667	5	8.08333	162.695	8.56433	99.3203	19.6667	0.228026	c.2.1.9	Potassium channel NAD-binding domain	0.184549	General	Small molecule binding	ABE	moderate_disorder
DS.HE.4.10.6	HE	4	10	6	10.1667	6	8.87917	138.963	39.219	51.2642	20.1667	0.364665	c.59.1.1	MurCDEF C-terminal domain	0.184549	Metabolism	Other enzymes	ABE	high_disorder
DS.HE.3.73.3	HE	3	73	3	11.3333	4.66667	9.08933	164.479	101.478	86.2287	19	0.407407	c.59.1.1	MurCDEF C-terminal domain	0.184549	Metabolism	Other enzymes	ABE	high_disorder
DS.HE.2.13.7	HE	2	13	7	15	6.5	7.5565	154.271	54.262	94.7943	23.5	0.293056	c.59.1.1	MurCDEF C-terminal domain	0.184549	Metabolism	Other enzymes	ABE	moderate_disorder
DS.EH.4.95.1	EH	4	95	1	4.75	11.5	12.678	158.477	336.381	61.6647	20.25	0.446146	c.59.1.1	MurCDEF C-terminal domain	0.184549	Metabolism	Other enzymes	ABE	high_disorder
DS.HE.2.40.2	HE	2	40	2	14	7	9.226	151.193	58.6183	136.628	23	0.431289	d.286.1.1	TrkA C-terminal domain-like	0.184549	Intracellular_processes	Inorganic ion transport and metabolism	ABE	high_disorder
DS.HE.3.16.19	HE	3	16	19	9	5.66667	9.31633	108.575	106.954	49.0233	17.6667	0.382564	c.90.1.1	Tetrapyrrole methylase	0.184549	Metabolism	Transferases	ABE	high_disorder
DS.GE.2.23.3	GE	2	23	3	3	6.66667	9.38467	69.6463	94.6193	95.2307	11.6667	1	c.90.1.1	Tetrapyrrole methylase	0.184549	Metabolism	Transferases	ABE	high_disorder
DS.GE.2.2.10	GE	2	2	10	3	3.75	7.7605	161.946	105.007	97.2081	8.75	0.625	c.2.1.9	Potassium channel NAD-binding domain	0.184549	General	Small molecule binding	ABE	high_disorder
DS.EH.1.2.22	EH	1	2	22	3.75	10.3333	6.48925	83.0585	98.6715	14.2168	15.0833	0.683237	c.2.1.9	Potassium channel NAD-binding domain	0.184549	General	Small molecule binding	ABE	high_disorder
DS.BN.7.11.1	BN	7	11	1	5.61538	5.53846	4.93646	168.102	344.251	98.2025	18.1538	0.55668	c.90.1.1	Tetrapyrrole methylase	0.184549	Metabolism	Transferases	ABE	high_disorder
DS.GH.0.1.119	GH	0	1	119	4	9.33333	2.45233	26.9987	16.3577	17.0603	13.3333	0.0868347	d.90.1.1	NADH oxidase/flavin reductase	0.184549	Metabolism	Electron transfer/transport	ABE	ordered
DS.HG.5.5.2	HG	5	5	2	11	3	15.856	113.733	190.692	33.9087	19	0.842105	d.90.1.1	NADH oxidase/flavin reductase	0.184549	Metabolism	Electron transfer/transport	ABE	high_disorder
DS.HE.5.127.1	HE	5	127	1	13.3333	5.33333	11.21	158.634	185.515	117.7	23.6667	0.590348	c.72.2.1	MurCDEF	0.184549	Intracellular_processes	Proteases, peptidases and their inhibitors	ABE	high_disorder
DS.HE.3.110.1	HE	3	110	1	10.2	5.2	10.83	152.854	78.5292	104.557	18.4	0.680909	c.72.2.1	MurCDEF	0.184549	Intracellular_processes	Proteases, peptidases and their inhibitors	ABE	high_disorder
DS.HE.2.5.6	HE	2	5	6	15.375	6.125	9.35875	162.5	35.8025	127.012	23.5	0.450617	c.6.3.1	PHP domain	0.184549	Metabolism	Other enzymes	ABEV	high_disorder
DS.HE.4.2.20	HE	4	2	20	11	4.66667	9.84367	150.026	140.086	96.3037	19.6667	0.611111	c.6.3.1	PHP domain	0.184549	Metabolism	Other enzymes	ABEV	high_disorder
DS.GE.3.6.1	GE	3	6	1	3	6.21739	11.4954	79.5583	112.032	97.6417	12.2174	0.726867	d.90.1.1	NADH oxidase/flavin reductase	0.184549	Metabolism	Electron transfer/transport	ABE	high_disorder
DS.HE.5.8.5	HE	5	8	5	11.75	3.5	9.2705	160.518	85.39	85.1555	20.25	0.3525	c.6.3.1	PHP domain	0.184549	Metabolism	Other enzymes	ABEV	high_disorder
DS.HE.2.13.9	HE	2	13	9	9.25	4.25	8.3725	120.73	67.1462	79.6047	15.5	0.457532	c.6.3.1	PHP domain	0.184549	Metabolism	Other enzymes	ABEV	high_disorder
DS.EH.4.163.1	EH	4	163	1	6.33333	16.6667	12.1907	119.299	331.632	79.2517	27	0.136211	c.72.2.1	MurCDEF	0.184549	Intracellular_processes	Proteases, peptidases and their inhibitors	ABE	moderate_disorder
DS.EG.1.8.12	EG	1	8	12	5	3.33333	6.58867	130.228	115.563	25.2643	9.33333	0.666667	c.90.1.1	Tetrapyrrole methylase	0.184549	Metabolism	Transferases	ABE	high_disorder
DS.HE.5.2.13	HE	5	2	13	6.5	4.25	10.7982	121.036	32.0547	56.914	15.75	0.392119	c.65.1.1	Formyltransferase	0.188841	Metabolism	Transferases	ABEV	high_disorder
DS.HE.4.1.26	HE	4	1	26	9.66667	5	10.2912	155.016	7.07167	105.279	18.6667	0.479176	d.142.1.1	ATP-binding domain of peptide synthetases	0.188841	Metabolism	Coenzyme metabolism	ABEV	high_disorder
DS.GH.3.17.1	GH	3	17	1	4.25	11	11.3057	99.1428	10.612	138.423	18.25	0.738248	d.142.1.1	ATP-binding domain of peptide synthetases	0.188841	Metabolism	Coenzyme metabolism	ABEV	high_disorder
DS.BN.9.15.1	BN	9	15	1	8	8	6.04625	144.276	338.372	138.702	25	0.47	c.65.1.1	Formyltransferase	0.188841	Metabolism	Transferases	ABEV	high_disorder
DS.EH.6.48.1	EH	6	48	1	7	22.25	12.5038	157.939	329.961	52.7923	35.25	0.441135	c.65.1.1	Formyltransferase	0.188841	Metabolism	Transferases	ABEV	high_disorder
DS.BN.2.37.1	BN	2	37	1	4.66667	5.44444	5.02933	147.386	327.576	94.8567	12.1111	0.76418	c.36.1.10	TK-like PP module	0.193133	General	Small molecule binding	ABEV	high_disorder
DS.GG.4.2.1	GG	4	2	1	3	3	10.5673	63.9243	337.981	113.209	10	1	c.36.1.6	TK-like Pyr module	0.193133	General	Small molecule binding	ABE	high_disorder
DS.EH.4.88.1	EH	4	88	1	3	13.25	11.3667	147.183	18.8328	50.0078	20.25	0.0958333	c.36.1.6	TK-like Pyr module	0.193133	General	Small molecule binding	ABE	ordered
DS.EH.4.44.1	EH	4	44	1	3.71429	13.8571	12.8469	168.434	149.579	39.6787	21.5714	0.501489	c.36.1.6	TK-like Pyr module	0.193133	General	Small molecule binding	ABE	high_disorder
DS.EG.2.1.52	EG	2	1	52	3.66667	4.33333	6.53233	76.9947	19.9883	24.8817	10	1	c.36.1.10	TK-like PP module	0.193133	General	Small molecule binding	ABEV	high_disorder
DS.EH.1.24.1	EH	1	24	1	8.5	5.875	5.44212	74.7113	33.1956	52.8496	15.375	0.619052	e.7.1.1	Inositol monophosphatase/fructose-1,6-bisphosphatase-like	0.193133	Metabolism	Carbohydrate transport and metabolism	ABE	high_disorder
DS.HH.6.75.1	HH	6	75	1	13	15	12.6473	131.868	325.75	116.683	34	0.484775	c.3.1.4	Succinate dehydrogenase/fumarate reductase flavoprotein N-terminal domain	0.193133	General	Small molecule binding	ABE	high_disorder
DS.HH.1.2.27	HH	1	2	27	16.2	11.8	5.7554	139.157	104.781	68.0082	29	0.381647	c.36.1.10	TK-like PP module	0.193133	General	Small molecule binding	ABEV	high_disorder
DS.HE.4.87.1	HE	4	87	1	11	4.6	12.9696	142.19	152.043	128.209	19.6	0.196339	c.36.1.6	TK-like Pyr module	0.193133	General	Small molecule binding	ABE	moderate_disorder
DS.BK.2.15.2	BK	2	15	2	3.25	6.66667	6.79675	84.7228	100.9	29.745	11.9167	0.847222	c.3.1.4	Succinate dehydrogenase/fumarate reductase flavoprotein N-terminal domain	0.193133	General	Small molecule binding	ABE	high_disorder
DS.BK.2.7.8	BK	2	7	8	4	10.3333	7.23433	113.846	51.1567	37.189	16.3333	0.612795	c.3.1.4	Succinate dehydrogenase/fumarate reductase flavoprotein N-terminal domain	0.193133	General	Small molecule binding	ABE	high_disorder
DS.GH.0.1.124	GH	0	1	124	5.33333	10.6667	3.33167	64.5013	82.4033	27.1137	16	0.727273	c.3.1.4	Succinate dehydrogenase/fumarate reductase flavoprotein N-terminal domain	0.193133	General	Small molecule binding	ABE	high_disorder
DS.BN.2.44.2	BN	2	44	2	7.5	4	5.23075	163.504	312.186	114.832	13.5	0.52381	d.15.4.2	2Fe-2S ferredoxin domains from multidomain proteins	0.193133	Metabolism	Oxidation/Reduction	ABE	high_disorder
DS.EG.1.2.55	EG	1	2	55	4.33333	3	6.91133	113.407	173.724	20.4487	8.33333	1	d.15.4.2	2Fe-2S ferredoxin domains from multidomain proteins	0.193133	Metabolism	Oxidation/Reduction	ABE	high_disorder
DS.EH.3.31.3	EH	3	31	3	3.33333	14	8.51367	62.9903	193.175	49.0687	20.3333	0.638889	d.15.4.2	2Fe-2S ferredoxin domains from multidomain proteins	0.193133	Metabolism	Oxidation/Reduction	ABE	high_disorder
DS.BK.2.51.1	BK	2	51	1	6.16667	3.66667	7.61967	82.2147	64.5847	34.8317	11.8333	0.511905	c.36.1.10	TK-like PP module	0.193133	General	Small molecule binding	ABEV	high_disorder
DS.BK.9.10.1	BK	9	10	1	10	7	11.0313	81.3777	1.69433	113.278	26	0.39751	c.56.2.1	Purine and uridine phosphorylases	0.197425	Metabolism	Nucleotide transport and metabolism	ABEV	high_disorder
DS.BK.9.1.1	BK	9	1	1	10	9.11111	10.4124	84.1901	357.318	113.033	28.1111	0.284827	c.56.2.1	Purine and uridine phosphorylases	0.197425	Metabolism	Nucleotide transport and metabolism	ABEV	moderate_disorder
DS.HE.2.11.10	HE	2	11	10	6.66667	5	5.65	31.6263	24.902	12.6917	13.6667	0.875	c.56.2.1	Purine and uridine phosphorylases	0.197425	Metabolism	Nucleotide transport and metabolism	ABEV	high_disorder
DS.HE.7.59.1	HE	7	59	1	11.6667	3.66667	10.5643	139.553	58.3723	56.8843	22.3333	0.660024	d.157.1.2	Glyoxalase II (hydroxyacylglutathione hydrolase)	0.197425	Metabolism	Oxidation/Reduction	ABEV	high_disorder
DS.HE.4.205.1	HE	4	205	1	12	5.66667	6.939	155.37	106.442	68.7663	21.6667	0.161155	d.43.2.1	Band 7/SPFH domain	0.197425	Intracellular_processes	Inorganic ion transport and metabolism	ABEV	moderate_disorder
DS.HE.5.188.1	HE	5	188	1	5	4.33333	7.48833	125.14	174.147	95.247	14.3333	0.2	d.58.1.5	Ferredoxin domains from multidomain proteins	0.197425	Metabolism	Oxidation/Reduction	ABEV	moderate_disorder
DS.HH.1.1.79	HH	1	1	79	6.5	6.75	4.62913	73.0589	53.2441	49.1859	14.25	0.296667	c.68.1.6	glucose-1-phosphate thymidylyltransferase	0.197425	Metabolism	Transferases	ABEV	moderate_disorder
DS.GE.1.5.7	GE	1	5	7	3.5	3.5	5.55567	56.6917	147.723	60.6012	8	1	c.68.1.6	glucose-1-phosphate thymidylyltransferase	0.197425	Metabolism	Transferases	ABEV	high_disorder
DS.EH.4.40.1	EH	4	40	1	7.2	10.2	13.0568	158.397	320.267	94.7526	21.4	0.23442	c.68.1.6	glucose-1-phosphate thymidylyltransferase	0.197425	Metabolism	Transferases	ABEV	moderate_disorder
DS.BN.4.73.1	BN	4	73	1	4	4	4.63886	128.375	350.031	98.0143	12	0.827031	c.1.28.2	Oxygen-independent coproporphyrinogen III oxidase HemN	0.197425	Metabolism	Other enzymes	ABEV	high_disorder
DS.GE.4.7.1	GE	4	7	1	3.66667	4.33333	11.3537	93.0507	63.7703	75.3133	12	0.666667	c.1.28.2	Oxygen-independent coproporphyrinogen III oxidase HemN	0.197425	Metabolism	Other enzymes	ABEV	high_disorder
DS.GH.3.2.2	GH	3	2	2	3	11.25	11.5326	48.5899	16.3206	79.8727	17.25	0.768207	c.1.28.2	Oxygen-independent coproporphyrinogen III oxidase HemN	0.197425	Metabolism	Other enzymes	ABEV	high_disorder
DS.HE.2.38.1	HE	2	38	1	12.5714	5.85714	8.40086	108.832	116.784	86.0073	20.4286	0.34882	c.1.28.2	Oxygen-independent coproporphyrinogen III oxidase HemN	0.197425	Metabolism	Other enzymes	ABEV	high_disorder
DS.EH.4.178.1	EH	4	178	1	2.33333	7.33333	8.457	71.5127	105.857	25.9947	13.6667	0.770833	d.43.2.1	Band 7/SPFH domain	0.197425	Intracellular_processes	Inorganic ion transport and metabolism	ABEV	high_disorder
DS.BN.2.22.5	BN	2	22	5	4.75	3	4.4715	154.607	353.6	87.0385	9.75	1	d.157.1.2	Glyoxalase II (hydroxyacylglutathione hydrolase)	0.197425	Metabolism	Oxidation/Reduction	ABEV	high_disorder
DS.EH.4.136.1	EH	4	136	1	5	4	10.6637	140.005	254.633	67.1553	13	1	d.157.1.2	Glyoxalase II (hydroxyacylglutathione hydrolase)	0.197425	Metabolism	Oxidation/Reduction	ABEV	high_disorder
DS.HH.1.2.8	HH	1	2	8	10.7917	10.9583	5.50054	114.36	75.3327	54.2309	22.75	0.541148	d.43.2.1	Band 7/SPFH domain	0.197425	Intracellular_processes	Inorganic ion transport and metabolism	ABEV	high_disorder
DS.BN.2.46.2	BN	2	46	2	5	5.33333	5.02033	154.382	330.171	92.2013	12.3333	0.789474	d.157.1.2	Glyoxalase II (hydroxyacylglutathione hydrolase)	0.197425	Metabolism	Oxidation/Reduction	ABEV	high_disorder
DS.EH.1.2.23	EH	1	2	23	5.36364	8.36364	7.18173	129.615	55.2565	22.3951	14.7273	0.685483	c.68.1.6	glucose-1-phosphate thymidylyltransferase	0.197425	Metabolism	Transferases	ABEV	high_disorder
DS.BN.2.15.14	BN	2	15	14	9	8.66667	5.162	159.474	203.674	102.963	19.6667	0.572965	d.38.1.5	PaaI/YdiI-like	0.201717	Metabolism	Lipid transport and metabolism	ABE	high_disorder
DS.BN.2.15.15	BN	2	15	15	6.33333	7.33333	4.759	173.199	176.051	98.0373	15.6667	0.803922	d.38.1.5	PaaI/YdiI-like	0.201717	Metabolism	Lipid transport and metabolism	ABE	high_disorder
DS.BN.3.1.2	BN	3	1	2	7.33051	7.61864	5.67408	169.789	206.759	65.7468	17.9492	0.465569	d.38.1.5	PaaI/YdiI-like	0.201717	Metabolism	Lipid transport and metabolism	ABE	high_disorder
DS.EG.2.3.5	EG	2	3	5	4.14286	3	9.13929	139.533	149.67	30.8097	9.14286	0.714286	d.38.1.5	PaaI/YdiI-like	0.201717	Metabolism	Lipid transport and metabolism	ABE	high_disorder
DS.GH.8.5.1	GH	8	5	1	3	18.3333	8.11667	87.289	17.948	23.8343	29.3333	0.272062	d.38.1.5	PaaI/YdiI-like	0.201717	Metabolism	Lipid transport and metabolism	ABE	moderate_disorder
DS.HE.2.50.1	HE	2	50	1	8.33333	4	9.17033	96.3767	78.0102	101.73	14.3333	0.811111	d.38.1.5	PaaI/YdiI-like	0.201717	Metabolism	Lipid transport and metabolism	ABE	high_disorder
DS.HH.1.1.146	HH	1	1	146	10	10.6667	5.314	35.2197	120.352	37.1083	21.6667	0.570025	d.38.1.5	PaaI/YdiI-like	0.201717	Metabolism	Lipid transport and metabolism	ABE	high_disorder
DS.HE.2.4.3	HE	2	4	3	6.84615	6.92308	6.17092	76.8838	103.257	17.7224	15.7692	0.555699	d.101.1.1	Ribonuclease PH domain 2-like	0.201717	Metabolism	Nucleotide transport and metabolism	ABE	high_disorder
DS.HG.2.8.5	HG	2	8	5	9	3.25	8.406	85.6762	12.202	70.9695	14.25	0.776042	d.14.1.4	Ribonuclease PH domain 1-like	0.201717	Information	Translation, ribosomes, ribosome biogenesis; tRNA metabolism	ABE	high_disorder
DS.EG.2.5.11	EG	2	5	11	6	3.33333	9.31733	68.7613	229.638	13.4997	11.3333	1	d.14.1.4	Ribonuclease PH domain 1-like	0.201717	Information	Translation, ribosomes, ribosome biogenesis; tRNA metabolism	ABE	high_disorder
DS.EH.5.78.1	EH	5	78	1	7.75	14	9.46575	146.705	354.519	55.4625	26.75	0.273201	c.117.1.1	Amidase signature (AS) enzymes	0.201717	Metabolism	Other enzymes	ABE	moderate_disorder
DS.HE.3.16.16	HE	3	16	16	4.66667	6.33333	7.67767	126.851	129.331	53.9717	14	0.666667	d.101.1.1	Ribonuclease PH domain 2-like	0.201717	Metabolism	Nucleotide transport and metabolism	ABE	high_disorder
DS.HE.5.6.9	HE	5	6	9	9.66667	5	9.628	123.657	22.879	78.7397	19.6667	0.39916	c.117.1.1	Amidase signature (AS) enzymes	0.201717	Metabolism	Other enzymes	ABE	high_disorder
DS.HE.2.52.1	HE	2	52	1	4	6.4	5.595	52.2652	55.753	27.634	12.4	0.894118	d.101.1.1	Ribonuclease PH domain 2-like	0.201717	Metabolism	Nucleotide transport and metabolism	ABE	high_disorder
DS.EG.1.9.5	EG	1	9	5	6.8	4.2	6.26	58.111	187.635	10.7932	12	1	d.14.1.4	Ribonuclease PH domain 1-like	0.201717	Information	Translation, ribosomes, ribosome biogenesis; tRNA metabolism	ABE	high_disorder
DS.HH.5.11.5	HH	5	11	5	10.6667	11.6667	9.68633	131.645	51.0373	86.49	27.3333	0.318983	c.117.1.1	Amidase signature (AS) enzymes	0.201717	Metabolism	Other enzymes	ABE	high_disorder
DS.BN.3.76.1	BN	3	76	1	7.5	9	4.815	170.038	352.953	100.132	19.5	0.205263	c.95.1.2	Chalcone synthase-like	0.201717	Metabolism	Other enzymes	ABE	moderate_disorder
DS.HH.4.26.4	HH	4	26	4	12	12.3333	5.695	36.0457	166.37	37.787	28.3333	0.433333	c.117.1.1	Amidase signature (AS) enzymes	0.201717	Metabolism	Other enzymes	ABE	high_disorder
DS.HE.3.129.1	HE	3	129	1	12	6.75	8.14575	165.377	102.073	106.276	21.75	0.239619	c.1.5.1	Inosine monophosphate dehydrogenase (IMPDH)	0.201717	Metabolism	Oxidation/Reduction	ABEV	moderate_disorder
DS.GE.4.16.1	GE	4	16	1	3	3.25	14.6943	56.724	95.5152	65.9905	10.25	0.75	c.1.5.1	Inosine monophosphate dehydrogenase (IMPDH)	0.201717	Metabolism	Oxidation/Reduction	ABEV	high_disorder
DS.EH.5.59.1	EH	5	59	1	4.2	14.8	12.5816	162.848	28.7464	38.3616	24	0.516139	c.1.5.1	Inosine monophosphate dehydrogenase (IMPDH)	0.201717	Metabolism	Oxidation/Reduction	ABEV	high_disorder
DS.EH.4.81.1	EH	4	81	1	5.5	6.75	8.56575	74.965	196.933	58.436	16.25	0.751488	c.1.5.1	Inosine monophosphate dehydrogenase (IMPDH)	0.201717	Metabolism	Oxidation/Reduction	ABEV	high_disorder
DS.BN.5.8.2	BN	5	8	2	5	5	4.748	143.322	346.656	89.1524	15	0.550462	c.1.5.1	Inosine monophosphate dehydrogenase (IMPDH)	0.201717	Metabolism	Oxidation/Reduction	ABEV	high_disorder
DS.EH.0.1.29	EH	0	1	29	5.20588	6.73529	3.54376	71.5334	254.858	13.9551	11.9412	0.708897	c.95.1.2	Chalcone synthase-like	0.201717	Metabolism	Other enzymes	ABE	high_disorder
DS.HE.2.9.12	HE	2	9	12	6	4	7.31633	17.999	231.321	16.313	12	1	c.95.1.2	Chalcone synthase-like	0.201717	Metabolism	Other enzymes	ABE	high_disorder
DS.HG.1.1.64	HG	1	1	64	4.66667	3	4.609	87.0733	34.8943	75.5277	8.66667	1	c.117.1.1	Amidase signature (AS) enzymes	0.201717	Metabolism	Other enzymes	ABE	high_disorder
DS.BN.2.105.1	BN	2	105	1	6.66667	5.33333	4.60767	156.109	338.789	89.2187	14	0.666667	c.1.5.1	Inosine monophosphate dehydrogenase (IMPDH)	0.201717	Metabolism	Oxidation/Reduction	ABEV	high_disorder
DS.BK.3.18.6	BK	3	18	6	3	3	8.26433	103.079	50.4403	69.0697	9	0.666667	c.1.5.1	Inosine monophosphate dehydrogenase (IMPDH)	0.201717	Metabolism	Oxidation/Reduction	ABEV	high_disorder
DS.HE.2.58.1	HE	2	58	1	7.6	4.6	9.593	55.4478	98.3998	64.563	14.2	0.816667	c.1.5.1	Inosine monophosphate dehydrogenase (IMPDH)	0.201717	Metabolism	Oxidation/Reduction	ABEV	high_disorder
DS.HE.2.4.22	HE	2	4	22	4	6.66667	5.31667	47.0523	351.855	12.658	12.6667	1	d.151.1.1	DNase I-like	0.206009	Information	DNA replication, recombination, repair	ABEV	high_disorder
DS.HE.2.77.1	HE	2	77	1	15.6667	5	7.16433	82.2643	140.398	110.994	22.6667	0.551691	b.51.1.1	ValRS/IleRS/LeuRS editing domain	0.206009	Information	Translation, ribosomes, ribosome biogenesis; tRNA metabolism	ABEV	high_disorder
DS.EH.0.1.9	EH	0	1	9	5.2027	7.97297	2.93147	68.0722	340.22	11.1863	13.1757	0.545918	d.151.1.1	DNase I-like	0.206009	Information	DNA replication, recombination, repair	ABEV	high_disorder
DS.EH.5.180.1	EH	5	180	1	3.33333	9.66667	9.11533	81.3117	206.245	72.401	18	0.811111	b.51.1.1	ValRS/IleRS/LeuRS editing domain	0.206009	Information	Translation, ribosomes, ribosome biogenesis; tRNA metabolism	ABEV	high_disorder
DS.GE.2.35.1	GE	2	35	1	5.28571	5	8.688	116.112	80.2647	72.2906	12.2857	0.857143	b.51.1.1	ValRS/IleRS/LeuRS editing domain	0.206009	Information	Translation, ribosomes, ribosome biogenesis; tRNA metabolism	ABEV	high_disorder
DS.BK.2.84.1	BK	2	84	1	3.33333	4.66667	8.761	18.3267	191.301	28.313	10	1	d.151.1.1	DNase I-like	0.206009	Information	DNA replication, recombination, repair	ABEV	high_disorder
DS.EH.1.8.9	EH	1	8	9	7.75	7.25	6.287	69.6985	347.214	31.1015	16	0.7	c.97.1.2	Deoxycytidylate deaminase-like	0.2103	Metabolism	Other enzymes	ABEV	high_disorder
DS.EH.2.5.4	EH	2	5	4	5.27273	10.2727	8.92409	98.7248	154.727	29.4544	17.5455	0.617519	b.45.1.1	PNP-oxidase like	0.2103	Metabolism	Coenzyme metabolism	ABEV	high_disorder
DS.EH.3.5.3	EH	3	5	3	5.16667	8.58333	7.17633	73.6034	172.413	77.1082	16.75	0.640759	b.45.1.1	PNP-oxidase like	0.2103	Metabolism	Coenzyme metabolism	ABEV	high_disorder
DS.EH.3.5.6	EH	3	5	6	6.5	8	6.97517	80.3473	171.226	81.6625	17.5	0.590959	b.45.1.1	PNP-oxidase like	0.2103	Metabolism	Coenzyme metabolism	ABEV	high_disorder
DS.HE.2.2.13	HE	2	2	13	9	5.875	8.21187	122.059	97.4231	69.5464	16.875	0.336795	b.45.1.1	PNP-oxidase like	0.2103	Metabolism	Coenzyme metabolism	ABEV	high_disorder
DS.HE.6.54.1	HE	6	54	1	17.75	6	11.4525	148.98	8.76825	151.129	29.75	0.284213	c.97.1.2	Deoxycytidylate deaminase-like	0.2103	Metabolism	Other enzymes	ABEV	moderate_disorder
DS.EH.3.89.1	EH	3	89	1	5	12	11.5698	82.8135	154.179	26.0778	20	0.484986	c.97.1.2	Deoxycytidylate deaminase-like	0.2103	Metabolism	Other enzymes	ABEV	high_disorder
DS.HG.4.44.1	HG	4	44	1	14	3	11.002	50.918	339.5	23.1727	21	0.847879	d.144.1.6	APH phosphotransferases	0.2103	Regulation	Kinases and phosphatases and inhibitors	ABEV	high_disorder
DS.HE.2.43.2	HE	2	43	2	8	5.66667	7.83467	95.9013	127.799	108.018	15.6667	0.541161	c.97.1.2	Deoxycytidylate deaminase-like	0.2103	Metabolism	Other enzymes	ABEV	high_disorder
DS.HG.3.23.1	HG	3	23	1	10.75	3	9.16475	117.412	30.439	35.857	16.75	0.702717	c.97.1.2	Deoxycytidylate deaminase-like	0.2103	Metabolism	Other enzymes	ABEV	high_disorder
DS.HH.6.61.1	HH	6	61	1	4	13	13.762	42.2643	100.943	132.957	23	0.753623	c.97.1.2	Deoxycytidylate deaminase-like	0.2103	Metabolism	Other enzymes	ABEV	high_disorder
DS.BK.3.143.1	BK	3	143	1	9.33333	7.66667	7.27733	137.953	57.1003	68.1313	20	0.561728	d.14.1.5	GHMP Kinase, N-terminal domain	0.2103	Information	Translation, ribosomes, ribosome biogenesis; tRNA metabolism	ABEV	high_disorder
DS.BN.2.12.13	BN	2	12	13	10.6	6.4	4.9732	152.404	333.047	99.1008	19	0.425103	b.40.4.1	Anticodon-binding domain	0.2103	Information	DNA replication, recombination, repair	ABEV	high_disorder
DS.BN.2.5.18	BN	2	5	18	8.28571	7.42857	4.96986	153.588	333.131	102.111	17.7143	0.743925	b.40.4.1	Anticodon-binding domain	0.2103	Information	DNA replication, recombination, repair	ABEV	high_disorder
DS.BN.7.40.1	BN	7	40	1	8.75	9.5	4.711	140.661	348.67	94.0975	25.25	0.405492	b.40.4.1	Anticodon-binding domain	0.2103	Information	DNA replication, recombination, repair	ABEV	high_disorder
DS.EH.3.135.1	EH	3	135	1	4	13.6667	9.603	71.895	124.209	20.898	20.6667	0.77451	c.97.1.2	Deoxycytidylate deaminase-like	0.2103	Metabolism	Other enzymes	ABEV	high_disorder
DS.GH.4.5.1	GH	4	5	1	3	8.33333	10.5482	98.0302	334.311	28.834	15.3333	0.921569	d.144.1.6	APH phosphotransferases	0.2103	Regulation	Kinases and phosphatases and inhibitors	ABEV	high_disorder
DS.EH.10.6.1	EH	10	6	1	6.66667	16	11.3697	143.407	348.229	78.3037	32.6667	0.265152	d.14.1.5	GHMP Kinase, N-terminal domain	0.2103	Information	Translation, ribosomes, ribosome biogenesis; tRNA metabolism	ABEV	moderate_disorder
DS.EG.5.3.2	EG	5	3	2	3.33333	3	15.7283	99.1377	301.946	26.4927	11.3333	1	d.144.1.6	APH phosphotransferases	0.2103	Regulation	Kinases and phosphatases and inhibitors	ABEV	high_disorder
DS.HE.4.17.2	HE	4	17	2	6.33333	3.83333	8.87667	129.816	57.4552	49.8437	14.1667	0.57089	c.55.2.1	Creatinase/prolidase N-terminal domain	0.2103	Metabolism	Lipid transport and metabolism	ABE	high_disorder
DS.EH.6.99.1	EH	6	99	1	7.33333	15.3333	7.20667	151.27	35.3493	65.3757	28.6667	0.398284	c.55.2.1	Creatinase/prolidase N-terminal domain	0.2103	Metabolism	Lipid transport and metabolism	ABE	high_disorder
DS.EH.2.16.9	EH	2	16	9	5	6.33333	8.44733	30.059	133.279	16.8667	13.3333	0.491597	c.55.2.1	Creatinase/prolidase N-terminal domain	0.2103	Metabolism	Lipid transport and metabolism	ABE	high_disorder
DS.BK.6.36.1	BK	6	36	1	3.25	2	13.172	84.757	355.158	29.6062	11.25	0.826923	b.84.2.1	BC C-terminal domain-like	0.2103	Intracellular_processes	Transport	ABE	high_disorder
DS.EH.1.5.4	EH	1	5	4	3.75	11.125	4.3625	56.9695	105.6	52.1351	15.875	0.409854	d.144.1.6	APH phosphotransferases	0.2103	Regulation	Kinases and phosphatases and inhibitors	ABEV	high_disorder
DS.HE.6.12.2	HE	6	12	2	6	2	11.2553	154.907	260.648	114.313	14	1	c.46.1.2	Multidomain sulfurtransferase (rhodanese)	0.2103	Intracellular_processes	Cell devision and chromsome partitioning, cell cycle	ABEV	high_disorder
DS.EH.3.26.1	EH	3	26	1	4.76923	6.15385	9.596	113.686	23.1056	36.0812	13.9231	0.8663	c.46.1.2	Multidomain sulfurtransferase (rhodanese)	0.2103	Intracellular_processes	Cell devision and chromsome partitioning, cell cycle	ABEV	high_disorder
DS.EG.2.10.1	EG	2	10	1	3.125	3.4375	9.47612	61.3381	323.449	23.1157	8.5625	1	c.46.1.2	Multidomain sulfurtransferase (rhodanese)	0.2103	Intracellular_processes	Cell devision and chromsome partitioning, cell cycle	ABEV	high_disorder
DS.GH.0.1.128	GH	0	1	128	3.33333	11	3.74233	93.903	34.1193	77.331	14.3333	0.824561	b.40.4.1	Anticodon-binding domain	0.2103	Information	DNA replication, recombination, repair	ABEV	high_disorder
DS.HH.3.60.1	HH	3	60	1	10.3333	13.3333	7.479	148.072	76.88	109.87	26.6667	0.116935	d.14.1.5	GHMP Kinase, N-terminal domain	0.2103	Information	Translation, ribosomes, ribosome biogenesis; tRNA metabolism	ABEV	moderate_disorder
DS.EH.9.2.1	EH	9	2	1	7.16667	16.5	10.6908	138.6	346.381	78.4515	32.6667	0.174547	d.14.1.5	GHMP Kinase, N-terminal domain	0.2103	Information	Translation, ribosomes, ribosome biogenesis; tRNA metabolism	ABEV	moderate_disorder
DS.BK.6.65.1	BK	6	65	1	4.33333	3	15.3543	83.693	70.0457	35.1143	13.3333	0.0952381	d.144.1.6	APH phosphotransferases	0.2103	Regulation	Kinases and phosphatases and inhibitors	ABEV	ordered
DS.BK.4.206.1	BK	4	206	1	10.6667	5.33333	13.1487	103.61	59.1003	39.4683	20	0.479129	d.144.1.6	APH phosphotransferases	0.2103	Regulation	Kinases and phosphatases and inhibitors	ABEV	high_disorder
DS.HG.1.4.1	HG	1	4	1	12.6667	3	7.62441	80.0341	350.581	102.563	16.6667	0.706826	d.145.1.1	FAD-linked oxidases, N-terminal domain	0.2103	General	Small molecule binding	ABEV	high_disorder
DS.GE.3.1.8	GE	3	1	8	3	7	8.64267	79.2433	34.8213	39.5483	13	0.842105	b.40.4.1	Anticodon-binding domain	0.2103	Information	DNA replication, recombination, repair	ABEV	high_disorder
DS.BN.4.89.1	BN	4	89	1	4.2	3.8	4.8648	147.436	341.684	102.717	12	1	d.14.1.5	GHMP Kinase, N-terminal domain	0.2103	Information	Translation, ribosomes, ribosome biogenesis; tRNA metabolism	ABEV	high_disorder
DS.EH.5.52.1	EH	5	52	1	6.33333	12.3333	12.2257	127.734	333.384	84.589	23.6667	0.509398	d.145.1.1	FAD-linked oxidases, N-terminal domain	0.2103	General	Small molecule binding	ABEV	high_disorder
DS.GE.1.1.13	GE	1	1	13	3	4.8	5.7566	54.7228	93.0226	68.9742	8.8	0.625	d.14.1.3	DNA gyrase/MutL, second domain	0.214592	Information	Translation, ribosomes, ribosome biogenesis; tRNA metabolism	ABEV	high_disorder
DS.BK.11.10.1	BK	11	10	1	7	3.33333	12.878	71.6617	338.874	109.495	21.3333	0.782609	b.47.1.1	Prokaryotic proteases	0.214592	Intracellular_processes	Proteases, peptidases and their inhibitors	ABEV	high_disorder
DS.GH.8.6.1	GH	8	6	1	3	18.6667	8.17733	94.662	348.942	17.038	29.6667	0.134866	d.38.1.1	4HBT-like	0.214592	Metabolism	Lipid transport and metabolism	ABE	moderate_disorder
DS.GH.10.1.1	GH	10	1	1	3	16.6667	8.70533	93.782	44.203	33.0307	29.6667	0.236015	d.38.1.1	4HBT-like	0.214592	Metabolism	Lipid transport and metabolism	ABE	moderate_disorder
DS.HE.6.16.2	HE	6	16	2	5.66667	8.33333	10.6737	144.22	150.012	72.4547	20	0.760526	b.43.4.2	Ferredoxin reductase FAD-binding domain-like	0.214592	Metabolism	Coenzyme metabolism	ABE	high_disorder
DS.BN.2.11.2	BN	2	11	2	7.83333	5.83333	5.24133	160.157	334.553	114.748	15.6667	0.78835	b.43.4.2	Ferredoxin reductase FAD-binding domain-like	0.214592	Metabolism	Coenzyme metabolism	ABE	high_disorder
DS.HH.7.28.1	HH	7	28	1	5	8.66667	12.9723	139.659	325.233	68.982	20.6667	0.485714	d.54.1.1	Enolase N-terminal domain-like	0.214592	Metabolism	Other enzymes	ABEV	high_disorder
DS.HH.4.36.1	HH	4	36	1	16.8	4.2	9.7706	79.9924	14.557	113.5	25	0.183841	d.54.1.1	Enolase N-terminal domain-like	0.214592	Metabolism	Other enzymes	ABEV	moderate_disorder
DS.EG.2.3.6	EG	2	3	6	6.16667	3	9.57367	110.599	125.678	14.3953	11.1667	1	d.38.1.1	4HBT-like	0.214592	Metabolism	Lipid transport and metabolism	ABE	high_disorder
DS.EG.2.23.1	EG	2	23	1	4.94444	3	9.74894	123.406	126.534	21.182	9.94444	0.960317	d.38.1.1	4HBT-like	0.214592	Metabolism	Lipid transport and metabolism	ABE	high_disorder
DS.BK.8.10.1	BK	8	10	1	9.66667	11.3333	16.6397	132.045	334.595	75.1363	29	0.242574	d.38.1.1	4HBT-like	0.214592	Metabolism	Lipid transport and metabolism	ABE	moderate_disorder
DS.HE.2.33.1	HE	2	33	1	5.66667	7.66667	6.122	52.5447	55.5203	18.6977	15.3333	0.407143	d.14.1.3	DNA gyrase/MutL, second domain	0.214592	Information	Translation, ribosomes, ribosome biogenesis; tRNA metabolism	ABEV	high_disorder
DS.HE.1.2.12	HE	1	2	12	5	5	4.35525	53.1825	126.346	34.298	11	1	d.14.1.3	DNA gyrase/MutL, second domain	0.214592	Information	Translation, ribosomes, ribosome biogenesis; tRNA metabolism	ABEV	high_disorder
DS.EH.5.107.1	EH	5	107	1	2	19	11.0787	65.4278	150.289	65.7475	26	0.489259	d.14.1.3	DNA gyrase/MutL, second domain	0.214592	Information	Translation, ribosomes, ribosome biogenesis; tRNA metabolism	ABEV	high_disorder
DS.HH.3.6.14	HH	3	6	14	11.8	15.6	7.086	148.419	34.9982	57.1366	30.4	0.24782	d.54.1.1	Enolase N-terminal domain-like	0.214592	Metabolism	Other enzymes	ABEV	moderate_disorder
DS.HH.3.7.20	HH	3	7	20	4.75	11.75	7.56725	83.2352	122.031	22.2102	19.5	0.71	d.14.1.3	DNA gyrase/MutL, second domain	0.214592	Information	Translation, ribosomes, ribosome biogenesis; tRNA metabolism	ABEV	high_disorder
DS.EH.16.1.1	EH	16	1	1	5.33333	7	17.3887	151.244	347.871	92.7423	28.3333	0.66133	d.122.1.2	DNA gyrase/MutL, N-terminal domain	0.214592	Intracellular_processes	Posttranslational modification, protein turnover, chaperones	ABEV	high_disorder
DS.EG.1.2.3	EG	1	2	3	4.17241	3.41379	6.78803	98.4189	117.491	13.7335	8.58621	0.965517	c.60.1.1	Cofactor-dependent phosphoglycerate mutase	0.214592	Metabolism	Other enzymes	ABEV	high_disorder
DS.HE.4.208.1	HE	4	208	1	14.6667	6.66667	8.708	153.794	155.877	100.11	25.3333	0.292623	d.122.1.2	DNA gyrase/MutL, N-terminal domain	0.214592	Intracellular_processes	Posttranslational modification, protein turnover, chaperones	ABEV	moderate_disorder
DS.HH.2.10.8	HH	2	10	8	7.66667	11	7.49533	99.5493	157.734	70.9277	20.6667	0.794872	d.122.1.2	DNA gyrase/MutL, N-terminal domain	0.214592	Intracellular_processes	Posttranslational modification, protein turnover, chaperones	ABEV	high_disorder
DS.BN.5.136.1	BN	5	136	1	4	4	5.058	138.94	332.113	100.479	13	0.87037	d.122.1.2	DNA gyrase/MutL, N-terminal domain	0.214592	Intracellular_processes	Posttranslational modification, protein turnover, chaperones	ABEV	high_disorder
DS.BK.1.12.1	BK	1	12	1	4.11111	4	6.41378	63.4342	80.2826	49.3226	9.11111	0.786325	b.92.1.3	Hydantoinase (dihydropyrimidinase)	0.214592	Metabolism	Other enzymes	ABEV	high_disorder
DS.BK.1.7.4	BK	1	7	4	4.5	5	6.48633	70.9147	84.6948	39.3348	10.5	0.833333	b.92.1.3	Hydantoinase (dihydropyrimidinase)	0.214592	Metabolism	Other enzymes	ABEV	high_disorder
DS.HG.5.11.1	HG	5	11	1	14	3.33333	11.1567	141.513	18.6217	118.158	22.3333	0.338253	c.60.1.1	Cofactor-dependent phosphoglycerate mutase	0.214592	Metabolism	Other enzymes	ABEV	high_disorder
DS.BK.2.2.6	BK	2	2	6	4.6	2.9	7.5513	101.646	105.861	53.0841	9.5	0.9	b.92.1.3	Hydantoinase (dihydropyrimidinase)	0.214592	Metabolism	Other enzymes	ABEV	high_disorder
DS.BK.2.29.2	BK	2	29	2	5.33333	4	8.432	59.4657	124.426	43.3563	11.3333	1	b.92.1.3	Hydantoinase (dihydropyrimidinase)	0.214592	Metabolism	Other enzymes	ABEV	high_disorder
DS.BK.4.35.1	BK	4	35	1	4.375	4	9.68388	120.709	81.2139	49.5712	12.375	1	b.92.1.3	Hydantoinase (dihydropyrimidinase)	0.214592	Metabolism	Other enzymes	ABEV	high_disorder
DS.BK.4.59.1	BK	4	59	1	5.66667	4	10.1223	118.243	75.0803	47.5133	13.6667	1	b.92.1.3	Hydantoinase (dihydropyrimidinase)	0.214592	Metabolism	Other enzymes	ABEV	high_disorder
DS.HG.4.2.3	HG	4	2	3	10	3.16667	11.1293	106.271	354.328	110.983	17.1667	0.584897	c.60.1.1	Cofactor-dependent phosphoglycerate mutase	0.214592	Metabolism	Other enzymes	ABEV	high_disorder
DS.EG.2.75.1	EG	2	75	1	4.66667	3	9.506	144.468	128.837	37.308	9.66667	1	b.92.1.3	Hydantoinase (dihydropyrimidinase)	0.214592	Metabolism	Other enzymes	ABEV	high_disorder
DS.BN.2.6.18	BN	2	6	18	8.28571	7.85714	5.09057	168.025	203.85	115.837	18.1429	0.19267	c.13.2.1	Anti-sigma factor antagonist SpoIIaa	0.214592	Other	Function unknown	ABE	moderate_disorder
DS.EG.4.45.1	EG	4	45	1	8	3	10.477	147.312	198.238	23.0643	15	0.711111	c.14.1.4	Biotin dependent carboxylase carboxyltransferase domain	0.214592	Intracellular_processes	Proteases, peptidases and their inhibitors	ABE	high_disorder
DS.EH.1.22.3	EH	1	22	3	3	7	4.22233	93.8663	181.863	54.3927	11	1	c.14.1.4	Biotin dependent carboxylase carboxyltransferase domain	0.214592	Intracellular_processes	Proteases, peptidases and their inhibitors	ABE	high_disorder
DS.GE.2.13.2	GE	2	13	2	3	3.2	6.851	100.506	123.08	95.6974	8.2	1	c.13.2.1	Anti-sigma factor antagonist SpoIIaa	0.214592	Other	Function unknown	ABE	high_disorder
DS.EG.0.6.3	EG	0	6	3	6.25	3	3.4045	117.377	354.527	36.8315	9.25	1	d.122.1.2	DNA gyrase/MutL, N-terminal domain	0.214592	Intracellular_processes	Posttranslational modification, protein turnover, chaperones	ABEV	high_disorder
DS.HG.2.2.21	HG	2	2	21	11	3.33333	7.60167	60.9653	283.509	42.367	16.3333	0.688596	a.2.3.1	Chaperone J-domain	0.214592	Intracellular_processes	Posttranslational modification, protein turnover, chaperones	ABEV	high_disorder
DS.EH.6.58.1	EH	6	58	1	7	6.5	15.093	105.389	201.188	33.2717	19.5	0.553815	d.122.1.2	DNA gyrase/MutL, N-terminal domain	0.214592	Intracellular_processes	Posttranslational modification, protein turnover, chaperones	ABEV	high_disorder
DS.HE.1.23.1	HE	1	23	1	7	10	4.44333	51.9567	182.58	48.28	18	0.351852	d.122.1.2	DNA gyrase/MutL, N-terminal domain	0.214592	Intracellular_processes	Posttranslational modification, protein turnover, chaperones	ABEV	high_disorder
DS.HE.1.12.1	HE	1	12	1	8	2.7	5.6201	51.2049	124.75	39.0658	11.7	0.88125	c.112.1.1	Glycerol-3-phosphate (1)-acyltransferase	0.214592	Metabolism	Transferases	ABEV	high_disorder
DS.GG.2.6.5	GG	2	6	5	3	3	9.154	37.3267	55.784	94.4213	8	1	c.112.1.1	Glycerol-3-phosphate (1)-acyltransferase	0.214592	Metabolism	Transferases	ABEV	high_disorder
DS.GE.2.69.1	GE	2	69	1	3	4.66667	9.83633	73.9143	106.449	81.881	9.66667	1	c.14.1.4	Biotin dependent carboxylase carboxyltransferase domain	0.214592	Intracellular_processes	Proteases, peptidases and their inhibitors	ABE	high_disorder
DS.HE.3.104.1	HE	3	104	1	10.2	4.6	12.1218	165.982	161.02	130.004	17.8	0.7994	c.60.1.1	Cofactor-dependent phosphoglycerate mutase	0.214592	Metabolism	Other enzymes	ABEV	high_disorder
DS.GH.4.10.1	GH	4	10	1	3	9.33333	9.688	116.361	344.624	23.79	16.3333	0.901961	c.60.1.1	Cofactor-dependent phosphoglycerate mutase	0.214592	Metabolism	Other enzymes	ABEV	high_disorder
DS.GG.5.1.1	GG	5	1	1	3	3	16.6182	52.1388	38.049	94.3632	11	1	c.60.1.1	Cofactor-dependent phosphoglycerate mutase	0.214592	Metabolism	Other enzymes	ABEV	high_disorder
DS.HE.4.1.7	HE	4	1	7	12.7407	5.51852	9.6417	161.226	36.8695	97.4461	22.2593	0.271814	d.122.1.2	DNA gyrase/MutL, N-terminal domain	0.214592	Intracellular_processes	Posttranslational modification, protein turnover, chaperones	ABEV	moderate_disorder
DS.EH.1.4.31	EH	1	4	31	2.66667	10	3.62767	92.7683	145.219	49.41	13.6667	0.259259	c.14.1.4	Biotin dependent carboxylase carboxyltransferase domain	0.214592	Intracellular_processes	Proteases, peptidases and their inhibitors	ABE	moderate_disorder
DS.EG.3.18.1	EG	3	18	1	7.14286	3.57143	12.7021	60.7663	214.156	35.2021	13.7143	0.796327	c.112.1.1	Glycerol-3-phosphate (1)-acyltransferase	0.214592	Metabolism	Transferases	ABEV	high_disorder
DS.HG.2.11.4	HG	2	11	4	9.66667	4	7.11833	50.351	257.741	37.805	15.6667	0.6	a.2.3.1	Chaperone J-domain	0.214592	Intracellular_processes	Posttranslational modification, protein turnover, chaperones	ABEV	high_disorder
DS.HE.4.37.2	HE	4	37	2	11.1429	4.42857	10.4357	140.508	53.8963	92.473	19.5714	0.442356	d.15.9.1	Glutamine synthetase, N-terminal domain	0.218884	Metabolism	Coenzyme metabolism	ABEV	high_disorder
DS.BN.2.2.36	BN	2	2	36	5.69231	5.92308	4.70462	171.113	6.725	93.0748	13.6154	0.646039	d.128.1.1	Glutamine synthetase catalytic domain	0.218884	Metabolism	Amino acid transport and metabolism	ABEV	high_disorder
DS.EH.3.18.5	EH	3	18	5	6	6.66667	12.405	150.783	58.126	39.27	15.6667	0.4	d.16.1.3	D-aminoacid oxidase-like	0.218884	Metabolism	Oxidation/Reduction	ABE	high_disorder
DS.HG.1.3.12	HG	1	3	12	4	5	6.824	115.478	193.238	85.8715	10	1	d.16.1.3	D-aminoacid oxidase-like	0.218884	Metabolism	Oxidation/Reduction	ABE	high_disorder
DS.HH.4.1.8	HH	4	1	8	14.3333	10	9.55427	125.827	12.02	106.04	28.3333	0.338366	a.100.1.1	Hydroxyisobutyrate and 6-phosphogluconate dehydrogenase domain	0.218884	Metabolism	Energy production and conversion	ABEV	high_disorder
DS.HH.7.2.1	HH	7	2	1	13	12.75	8.26717	160.494	202.09	96.1818	32.75	0.318826	a.118.18.1	HCP-like	0.223176	Other	Function unknown	ABEV	high_disorder
DS.EH.4.15.5	EH	4	15	5	4.66667	13.3333	8.80533	169.438	17.985	74.3317	22	0.29909	c.23.16.2	DJ-1/PfpI	0.223176	Metabolism	Transferases	ABEV	moderate_disorder
DS.BK.3.2.8	BK	3	2	8	3.33333	6.66667	7.72833	130.245	66.184	63.3753	13	0.428571	b.82.3.2	cAMP-binding domain	0.223176	Regulation	Signal transduction	ABE	high_disorder
DS.BK.2.56.2	BK	2	56	2	6	2.66667	7.11633	127.918	99.5263	63.2767	10.6667	0.444444	b.82.3.2	cAMP-binding domain	0.223176	Regulation	Signal transduction	ABE	high_disorder
DS.BK.3.2.1	BK	3	2	1	5.32258	6.16129	8.46377	141.048	65.7511	69.3955	14.4839	0.500308	b.82.3.2	cAMP-binding domain	0.223176	Regulation	Signal transduction	ABE	high_disorder
DS.HH.3.5.17	HH	3	5	17	13	13	7.56867	132.288	191.305	92.6047	29	0.149425	a.118.18.1	HCP-like	0.223176	Other	Function unknown	ABEV	moderate_disorder
DS.EH.0.1.6	EH	0	1	6	4.33094	10.8777	3.28899	73.2721	191.662	15.0592	15.2086	0.573927	b.82.3.2	cAMP-binding domain	0.223176	Regulation	Signal transduction	ABE	high_disorder
DS.EG.1.1.2	EG	1	1	2	5.13253	3.16867	7.01452	109.49	12.4807	24.4356	9.3012	0.926326	d.26.1.1	FKBP immunophilin/proline isomerase	0.223176	Intracellular_processes	Posttranslational modification, protein turnover, chaperones	ABE	high_disorder
DS.EG.2.1.56	EG	2	1	56	6.66667	3.33333	6.26133	60.6187	35.6707	64.736	12	1	d.79.1.1	YjgF/L-PSP	0.223176	Other	Function unknown	ABEV	high_disorder
DS.EG.1.1.10	EG	1	1	10	6.25714	3.28571	7.09363	119.085	12.1236	35.7354	10.5429	0.911669	d.185.1.1	MPP-like	0.223176	Intracellular_processes	Proteases, peptidases and their inhibitors	ABEV	high_disorder
DS.EG.3.50.1	EG	3	50	1	8	3	11.165	52.9327	295.297	46.8643	14	0.547619	d.185.1.1	MPP-like	0.223176	Intracellular_processes	Proteases, peptidases and their inhibitors	ABEV	high_disorder
DS.EH.3.35.2	EH	3	35	2	8	15.75	10.5378	139.059	344.707	98.5325	26.75	0.356603	d.185.1.1	MPP-like	0.223176	Intracellular_processes	Proteases, peptidases and their inhibitors	ABEV	high_disorder
DS.HE.7.6.1	HE	7	6	1	7.28571	6.85714	10.2817	145.523	20.3427	60.254	21.1429	0.35127	d.26.1.1	FKBP immunophilin/proline isomerase	0.223176	Intracellular_processes	Posttranslational modification, protein turnover, chaperones	ABE	high_disorder
DS.GH.7.8.1	GH	7	8	1	3	8.66667	9.68167	121.683	48.319	131.123	18.6667	0.894737	d.185.1.1	MPP-like	0.223176	Intracellular_processes	Proteases, peptidases and their inhibitors	ABEV	high_disorder
DS.HE.3.10.1	HE	3	10	1	11	4.48718	8.44328	127.388	102.566	97.7189	18.4872	0.39873	d.185.1.1	MPP-like	0.223176	Intracellular_processes	Proteases, peptidases and their inhibitors	ABEV	high_disorder
DS.HG.2.10.1	HG	2	10	1	13.5714	3	8.87143	80.0819	326.858	37.0466	18.5714	0.765062	d.185.1.1	MPP-like	0.223176	Intracellular_processes	Proteases, peptidases and their inhibitors	ABEV	high_disorder
DS.HH.5.20.1	HH	5	20	1	7.38462	8.84615	17.5278	61.5655	29.0709	119.896	21.2308	0.708621	d.185.1.1	MPP-like	0.223176	Intracellular_processes	Proteases, peptidases and their inhibitors	ABEV	high_disorder
DS.BN.2.2.8	BN	2	2	8	5.59701	6.22388	4.76212	157.72	346.299	95.1651	13.8209	0.66265	d.79.1.1	YjgF/L-PSP	0.223176	Other	Function unknown	ABEV	high_disorder
DS.EG.2.1.21	EG	2	1	21	7.16667	3	7.53383	99.613	7.07233	70.893	12.1667	0.730769	d.79.1.1	YjgF/L-PSP	0.223176	Other	Function unknown	ABEV	high_disorder
DS.EG.2.1.31	EG	2	1	31	5.6	3.6	7.1496	95.2948	14.9674	76.2562	11.2	0.630769	d.79.1.1	YjgF/L-PSP	0.223176	Other	Function unknown	ABEV	high_disorder
DS.EG.4.36.1	EG	4	36	1	6	3	13.374	70.6073	196.131	60.979	13	1	d.79.1.1	YjgF/L-PSP	0.223176	Other	Function unknown	ABEV	high_disorder
DS.EG.3.70.1	EG	3	70	1	6	3	11.8137	84.1077	296.887	28.8327	12	0.694444	c.33.1.3	Isochorismatase-like hydrolases	0.223176	Metabolism	Other enzymes	ABEV	high_disorder
DS.HG.5.7.1	HG	5	7	1	22.6667	3.33333	9.71267	54.3057	25.593	115.077	31	0.32202	d.79.1.1	YjgF/L-PSP	0.223176	Other	Function unknown	ABEV	high_disorder
DS.HG.5.7.2	HG	5	7	2	15.3333	3	9.40033	41.8717	30.7163	106.252	23.3333	0.538333	d.79.1.1	YjgF/L-PSP	0.223176	Other	Function unknown	ABEV	high_disorder
DS.HE.4.52.3	HE	4	52	3	14.8	5.6	10.3292	140.372	132.578	104.057	24.4	0.208783	c.33.1.3	Isochorismatase-like hydrolases	0.223176	Metabolism	Other enzymes	ABEV	moderate_disorder
DS.HE.4.3.27	HE	4	3	27	11.5	6.5	11.319	149.282	29.3723	95.793	22	0.282468	c.33.1.3	Isochorismatase-like hydrolases	0.223176	Metabolism	Other enzymes	ABEV	moderate_disorder
DS.GG.3.6.1	GG	3	6	1	3	3	11.7683	22.8755	66.6415	100.784	9	1	c.33.1.3	Isochorismatase-like hydrolases	0.223176	Metabolism	Other enzymes	ABEV	high_disorder
DS.GE.6.9.1	GE	6	9	1	3	5	12.4057	117.178	25.9477	66.9167	14	1	c.33.1.3	Isochorismatase-like hydrolases	0.223176	Metabolism	Other enzymes	ABEV	high_disorder
DS.HE.3.98.2	HE	3	98	2	22.3333	4	5.642	123.124	171.376	60.1073	29.3333	0.329877	d.26.1.1	FKBP immunophilin/proline isomerase	0.223176	Intracellular_processes	Posttranslational modification, protein turnover, chaperones	ABE	high_disorder
DS.HE.2.19.7	HE	2	19	7	13.3333	5	7.782	64.4587	126.354	37.38	20.3333	0.325276	b.82.3.2	cAMP-binding domain	0.223176	Regulation	Signal transduction	ABE	high_disorder
DS.GH.3.48.1	GH	3	48	1	3.66667	12.3333	9.59467	141.117	73.7203	60.4357	19	0.645833	b.82.3.2	cAMP-binding domain	0.223176	Regulation	Signal transduction	ABE	high_disorder
DS.GH.1.2.24	GH	1	2	24	3	7.8	5.4458	106.437	73.631	93.731	11.8	0.8	d.79.1.1	YjgF/L-PSP	0.223176	Other	Function unknown	ABEV	high_disorder
DS.HE.4.10.10	HE	4	10	10	4	5.5	9.71125	97.5162	31.2535	36.1165	13.5	1	e.17.1.1	D-aminoacid aminotransferase-like PLP-dependent enzymes	0.227468	Metabolism	Transferases	ABEV	high_disorder
DS.BN.2.1.17	BN	2	1	17	5.53425	5.32877	4.71718	143.111	348.165	99.2703	12.863	0.644164	e.17.1.1	D-aminoacid aminotransferase-like PLP-dependent enzymes	0.227468	Metabolism	Transferases	ABEV	high_disorder
DS.BK.3.52.1	BK	3	52	1	4.4	5.8	5.3078	131.03	13.2734	121.129	13.2	0.846154	e.17.1.1	D-aminoacid aminotransferase-like PLP-dependent enzymes	0.227468	Metabolism	Transferases	ABEV	high_disorder
DS.HE.4.77.2	HE	4	77	2	13	5.75	7.88125	128.511	12.0288	121.909	22.75	0.389545	e.17.1.1	D-aminoacid aminotransferase-like PLP-dependent enzymes	0.227468	Metabolism	Transferases	ABEV	high_disorder
DS.EH.2.14.1	EH	2	14	1	4.35714	10.5	7.21786	53.4901	12.4695	35.122	16.8571	0.604648	e.17.1.1	D-aminoacid aminotransferase-like PLP-dependent enzymes	0.227468	Metabolism	Transferases	ABEV	high_disorder
DS.HE.4.59.3	HE	4	59	3	8.66667	5	9.78567	139.037	123.382	102.19	17.6667	0.150327	e.17.1.1	D-aminoacid aminotransferase-like PLP-dependent enzymes	0.227468	Metabolism	Transferases	ABEV	moderate_disorder
DS.EH.4.3.15	EH	4	3	15	5	11.6667	10.521	166.914	352.547	56.3667	20.6667	0.485684	c.37.1.2	Shikimate kinase (AroK)	0.227468	General	Small molecule binding	ABEV	high_disorder
DS.EH.10.9.1	EH	10	9	1	6	14	15.049	148.596	327.863	59.7273	30	0.811111	c.1.9.6	Hydantoinase (dihydropyrimidinase), catalytic domain	0.227468	Metabolism	Other enzymes	ABE	high_disorder
DS.HE.5.1.20	HE	5	1	20	10.75	2.5	9.4525	120.951	132.431	80.1967	18.25	0.316009	c.1.9.6	Hydantoinase (dihydropyrimidinase), catalytic domain	0.227468	Metabolism	Other enzymes	ABE	high_disorder
DS.GH.1.3.30	GH	1	3	30	3.66667	9.66667	5.89833	127.752	163.585	68.7873	14.3333	0.606349	c.37.1.2	Shikimate kinase (AroK)	0.227468	General	Small molecule binding	ABEV	high_disorder
DS.HE.4.232.1	HE	4	232	1	15	6	8.75533	145.534	120.735	51.2427	25	0.585859	c.37.1.2	Shikimate kinase (AroK)	0.227468	General	Small molecule binding	ABEV	high_disorder
DS.HE.5.137.1	HE	5	137	1	4.66667	5.66667	8.774	113.785	122.845	36.9047	15.3333	0.761905	c.1.11.2	D-glucarate dehydratase-like	0.23176	Metabolism	Energy production and conversion	ABE	high_disorder
DS.HE.4.86.1	HE	4	86	1	13.5	5.3	10.3374	158.971	19.2691	108.605	22.8	0.4188	c.1.11.2	D-glucarate dehydratase-like	0.23176	Metabolism	Energy production and conversion	ABE	high_disorder
DS.HE.4.237.1	HE	4	237	1	10	4	11.51	171.02	25.44	116.616	18	0.259259	c.1.11.2	D-glucarate dehydratase-like	0.23176	Metabolism	Energy production and conversion	ABE	moderate_disorder
DS.HE.4.203.1	HE	4	203	1	11.6667	4	9.94933	160.24	68.3813	109.112	19.6667	0.50463	c.1.11.2	D-glucarate dehydratase-like	0.23176	Metabolism	Energy production and conversion	ABE	high_disorder
DS.EG.6.10.1	EG	6	10	1	5	3	12.3863	71.709	23.5627	72.9907	14	0.142857	b.49.2.3	Eukaryotic ODC-like	0.23176	Metabolism	Amino acid transport and metabolism	ABEV	moderate_disorder
DS.EH.6.5.1	EH	6	5	1	4.83333	10.6667	14.5341	160.142	349.293	54.6788	21.5	0.375884	c.1.11.2	D-glucarate dehydratase-like	0.23176	Metabolism	Energy production and conversion	ABE	high_disorder
DS.EH.6.19.2	EH	6	19	2	3	10	13.1377	163.374	348.509	54.398	19	0.315789	c.1.11.2	D-glucarate dehydratase-like	0.23176	Metabolism	Energy production and conversion	ABE	high_disorder
DS.EH.9.14.1	EH	9	14	1	8	12	10.7543	168.827	59.091	123.216	29	0.551852	d.81.1.3	Dihydrodipicolinate reductase-like	0.23176	Metabolism	Energy production and conversion	ABEV	high_disorder
DS.EG.0.8.5	EG	0	8	5	8	3	4.15767	113.091	207.146	5.63367	11	0.755556	d.81.1.3	Dihydrodipicolinate reductase-like	0.23176	Metabolism	Energy production and conversion	ABEV	high_disorder
DS.BN.8.13.1	BN	8	13	1	6.57143	8.28571	4.21229	126.515	8.63657	74.9073	22.8571	0.317718	b.49.2.3	Eukaryotic ODC-like	0.23176	Metabolism	Amino acid transport and metabolism	ABEV	high_disorder
DS.GH.4.18.1	GH	4	18	1	3	9.5	11.3438	73.1368	51.7533	108.773	16.5	0.180556	d.177.1.1	FAH	0.23176	Metabolism	Other enzymes	ABE	moderate_disorder
DS.EH.8.21.1	EH	8	21	1	5.66667	5	15.1647	112.924	119.325	94.202	18.6667	0.438889	b.49.2.3	Eukaryotic ODC-like	0.23176	Metabolism	Amino acid transport and metabolism	ABEV	high_disorder
DS.HE.3.5.6	HE	3	5	6	14.125	3.66667	11.1508	161.847	98.5983	128.923	20.7917	0.339073	c.1.11.2	D-glucarate dehydratase-like	0.23176	Metabolism	Energy production and conversion	ABE	high_disorder
DS.BK.3.174.1	BK	3	174	1	4.66667	4.33333	12.546	27.0823	69.5473	26.895	12	0.769231	d.177.1.1	FAH	0.23176	Metabolism	Other enzymes	ABE	high_disorder
DS.EG.1.6.4	EG	1	6	4	3.71429	3	5.61386	40.2656	235.116	31.1904	7.71429	0.857143	d.168.1.1	Succinate dehydrogenase/fumarate reductase flavoprotein, catalytic domain	0.236052	Metabolism	Electron transfer/transport	ABE	high_disorder
DS.EH.1.1.42	EH	1	1	42	4.84615	8.15385	6.71215	93.5956	127.034	7.32408	14	0.601901	a.7.3.1	Succinate dehydrogenase/fumarate reductase flavoprotein C-terminal domain	0.236052	Metabolism	Oxidation/Reduction	ABE	high_disorder
DS.HH.3.68.1	HH	3	68	1	17.6667	16.6667	8.637	126.26	349.253	67.941	37.3333	0.229718	d.168.1.1	Succinate dehydrogenase/fumarate reductase flavoprotein, catalytic domain	0.236052	Metabolism	Electron transfer/transport	ABE	moderate_disorder
DS.HH.3.11.7	HH	3	11	7	11.75	14.25	7.70175	116.908	100.98	93.7583	29	0.321872	d.168.1.1	Succinate dehydrogenase/fumarate reductase flavoprotein, catalytic domain	0.236052	Metabolism	Electron transfer/transport	ABE	high_disorder
DS.HE.3.127.1	HE	3	127	1	6	2.5	7.71625	99.1155	104.114	83.2542	11.5	1	d.168.1.1	Succinate dehydrogenase/fumarate reductase flavoprotein, catalytic domain	0.236052	Metabolism	Electron transfer/transport	ABE	high_disorder
DS.GE.1.8.4	GE	1	8	4	3	5.57143	6.87871	85.4524	98.6777	93.7053	9.57143	0.866667	d.168.1.1	Succinate dehydrogenase/fumarate reductase flavoprotein, catalytic domain	0.236052	Metabolism	Electron transfer/transport	ABE	high_disorder
DS.EH.1.3.17	EH	1	3	17	4.2	8.4	5.8576	30.3754	189.173	36.0982	13.6	0.507619	d.168.1.1	Succinate dehydrogenase/fumarate reductase flavoprotein, catalytic domain	0.236052	Metabolism	Electron transfer/transport	ABE	high_disorder
DS.EH.5.87.1	EH	5	87	1	6	4.75	8.7805	151.387	190.409	110.211	15.75	0.890625	c.80.1.3	mono-SIS domain	0.236052	Metabolism	Energy production and conversion	ABEV	high_disorder
DS.BN.2.63.1	BN	2	63	1	5.2	4.8	4.6982	134.038	333.756	86.2874	12	0.774603	c.74.1.1	AraD-like aldolase/epimerase	0.236052	Metabolism	Other enzymes	ABEV	high_disorder
DS.GE.1.1.5	GE	1	1	5	3.07692	3.89231	5.83206	69.7734	108.777	72.2683	7.96923	0.984615	c.74.1.1	AraD-like aldolase/epimerase	0.236052	Metabolism	Other enzymes	ABEV	high_disorder
DS.GG.2.2.4	GG	2	2	4	3	3	10.1423	112.808	352.477	74.8405	8	1	c.74.1.1	AraD-like aldolase/epimerase	0.236052	Metabolism	Other enzymes	ABEV	high_disorder
DS.HE.4.9.18	HE	4	9	18	10	4.66667	6.883	128.281	17.1717	73.1607	18.6667	0.621554	c.74.1.1	AraD-like aldolase/epimerase	0.236052	Metabolism	Other enzymes	ABEV	high_disorder
DS.EH.6.114.1	EH	6	114	1	5.33333	9.33333	10.4823	154.436	208.521	76.7623	20.6667	0.475725	c.80.1.3	mono-SIS domain	0.236052	Metabolism	Energy production and conversion	ABEV	high_disorder
DS.HE.4.55.2	HE	4	55	2	14	3.6	7.6034	154.238	140.473	116.444	21.6	0.511442	c.80.1.3	mono-SIS domain	0.236052	Metabolism	Energy production and conversion	ABEV	high_disorder
DS.HE.5.28.2	HE	5	28	2	9.5	5.33333	10.8523	148.303	20.6888	95.8512	19.8333	0.40398	c.80.1.3	mono-SIS domain	0.236052	Metabolism	Energy production and conversion	ABEV	high_disorder
DS.EH.6.14.1	EH	6	14	1	5.25	12.375	9.24375	155.295	188.262	75.1109	23.625	0.356658	c.80.1.3	mono-SIS domain	0.236052	Metabolism	Energy production and conversion	ABEV	high_disorder
DS.BK.4.48.1	BK	4	48	1	6.42857	5.42857	7.157	128.115	80.8144	73.9963	15.8571	0.589395	b.82.1.9	TM1287-like	0.240343	Metabolism	Nitrogen metabolism	ABEV	high_disorder
DS.BN.5.61.1	BN	5	61	1	9.2	5.8	9.2196	146.263	332.478	147.954	20	0.472763	b.82.1.9	TM1287-like	0.240343	Metabolism	Nitrogen metabolism	ABEV	high_disorder
DS.GE.3.37.1	GE	3	37	1	3	3.16667	12.1958	107.309	117.507	87.3398	9.16667	1	b.82.1.9	TM1287-like	0.240343	Metabolism	Nitrogen metabolism	ABEV	high_disorder
DS.BK.4.1.19	BK	4	1	19	7.28571	6.42857	8.51529	122.05	95.683	77.2536	17.7143	0.643887	b.82.1.9	TM1287-like	0.240343	Metabolism	Nitrogen metabolism	ABEV	high_disorder
DS.BN.2.10.39	BN	2	10	39	7.66667	7.66667	4.913	157.157	199.794	102.825	17.3333	0.754386	b.82.1.9	TM1287-like	0.240343	Metabolism	Nitrogen metabolism	ABEV	high_disorder
DS.BK.6.4.1	BK	6	4	1	5.125	7.75	8.96537	148.097	76.7145	57.0913	18.875	0.563299	b.82.1.9	TM1287-like	0.240343	Metabolism	Nitrogen metabolism	ABEV	high_disorder
DS.HE.4.2.8	HE	4	2	8	10.9	4.7	8.7003	144.621	122.631	104.702	19.6	0.499324	d.136.1.1	Nuclease	0.244635	Metabolism	Other enzymes	ABEV	high_disorder
DS.HE.2.17.1	HE	2	17	1	8.6	5.1	6.8809	61.0466	121.037	27.3597	15.7	0.933148	d.136.1.1	Nuclease	0.244635	Metabolism	Other enzymes	ABEV	high_disorder
DS.EH.3.51.1	EH	3	51	1	4.83333	4	10.6988	49.7225	34.2113	97.0367	11.8333	0.833333	c.81.1.1	Formate dehydrogenase/DMSO reductase, domains 1-3	0.244635	Metabolism	Oxidation/Reduction	ABE	high_disorder
DS.EH.3.51.2	EH	3	51	2	5	4	10.6067	40.2287	32.733	92.0693	12	1	c.81.1.1	Formate dehydrogenase/DMSO reductase, domains 1-3	0.244635	Metabolism	Oxidation/Reduction	ABE	high_disorder
DS.EH.4.171.1	EH	4	171	1	6	4	10.2543	115.228	208.789	109.648	14	0.166667	c.81.1.1	Formate dehydrogenase/DMSO reductase, domains 1-3	0.244635	Metabolism	Oxidation/Reduction	ABE	moderate_disorder
DS.GG.1.2.7	GG	1	2	7	3	3	4.76067	39.7718	34.9547	96.2402	7	1	c.1.10.5	HMGL-like	0.244635	Metabolism	Carbohydrate transport and metabolism	ABEV	high_disorder
DS.EH.7.50.1	EH	7	50	1	5	14	13.3963	150.246	329.078	65.8683	26	0.346154	c.1.10.5	HMGL-like	0.244635	Metabolism	Carbohydrate transport and metabolism	ABEV	high_disorder
DS.HH.5.3.2	HH	5	3	2	11.2	13.2	9.2062	143.02	322.487	87.0564	29.4	0.238991	a.103.1.1	Citrate synthase	0.244635	Metabolism	Energy production and conversion	ABE	moderate_disorder
DS.HH.4.48.2	HH	4	48	2	10	9.33333	9.58833	153.016	124.509	100.657	23.3333	0.571429	a.103.1.1	Citrate synthase	0.244635	Metabolism	Energy production and conversion	ABE	high_disorder
DS.EH.6.57.1	EH	6	57	1	3.25	14.75	12.5802	125.79	28.5115	42.1412	24	0.186087	c.81.1.1	Formate dehydrogenase/DMSO reductase, domains 1-3	0.244635	Metabolism	Oxidation/Reduction	ABE	moderate_disorder
DS.HE.3.16.10	HE	3	16	10	4	4.66667	7.42733	110.663	156.136	39.9447	11.6667	0.769231	c.81.1.1	Formate dehydrogenase/DMSO reductase, domains 1-3	0.244635	Metabolism	Oxidation/Reduction	ABE	high_disorder
DS.HE.3.16.4	HE	3	16	4	4.4	4.2	7.3752	112.178	150.366	53.2406	11.6	0.657143	c.81.1.1	Formate dehydrogenase/DMSO reductase, domains 1-3	0.244635	Metabolism	Oxidation/Reduction	ABE	high_disorder
DS.HE.7.2.2	HE	7	2	2	6	5.33333	13.402	79.0663	345.391	94.9753	18.3333	0.619883	b.52.2.2	Formate dehydrogenase/DMSO reductase, C-terminal domain	0.244635	General	General or several functions	ABE	high_disorder
DS.EG.1.29.1	EG	1	29	1	5.75	3	7.113	83.3612	306.358	16.9892	9.75	1	c.1.10.5	HMGL-like	0.244635	Metabolism	Carbohydrate transport and metabolism	ABEV	high_disorder
DS.HE.4.10.7	HE	4	10	7	6.16667	4.5	9.21367	119.726	79.1902	32.3857	14.6667	0.247774	c.81.1.1	Formate dehydrogenase/DMSO reductase, domains 1-3	0.244635	Metabolism	Oxidation/Reduction	ABE	moderate_disorder
DS.EG.2.10.7	EG	2	10	7	3.25	3	9.6325	60.327	275.736	30.2707	8.25	1	c.1.10.5	HMGL-like	0.244635	Metabolism	Carbohydrate transport and metabolism	ABEV	high_disorder
DS.HE.5.107.1	HE	5	107	1	9.5	6.75	9.618	115.951	103.003	98.4603	21.25	0.205497	d.58.18.3	Phenylalanine metabolism regulatory domain	0.244635	Metabolism	Amino acid transport and metabolism	ABE	moderate_disorder
DS.EG.2.40.1	EG	2	40	1	4	3.5	9.6645	100.328	346.541	23.1985	9.5	0.75	d.160.1.2	Carbamilase	0.244635	Metabolism	Other enzymes	ABEV	high_disorder
DS.EH.4.2.4	EH	4	2	4	5	12.75	9.347	165.227	107.01	55.8402	21.75	0.595779	c.2.1.8	CoA-binding domain	0.244635	General	Small molecule binding	ABE	high_disorder
DS.BK.2.82.1	BK	2	82	1	3.33333	3	6.575	67.4747	144.421	35.231	8.33333	1	c.76.1.2	Arylsulfatase	0.244635	Metabolism	Other enzymes	ABEV	high_disorder
DS.EH.8.12.1	EH	8	12	1	4.75	11.25	9.02025	160.076	125.9	71.455	24	0.541667	c.2.1.8	CoA-binding domain	0.244635	General	Small molecule binding	ABE	high_disorder
DS.HE.2.2.12	HE	2	2	12	9.625	5.625	8.38125	108.564	114.974	63.0381	17.25	0.523335	c.2.1.8	CoA-binding domain	0.244635	General	Small molecule binding	ABE	high_disorder
DS.GH.4.28.1	GH	4	28	1	3	10	11.126	121.735	31.7513	85.4417	17	0.392157	d.3.1.4	Transglutaminase core	0.244635	Intracellular_processes	Proteases, peptidases and their inhibitors	ABEV	high_disorder
DS.BK.6.27.1	BK	6	27	1	9.4	3.6	10.9364	131.103	331.54	95.0652	19	0.66386	b.52.2.2	Formate dehydrogenase/DMSO reductase, C-terminal domain	0.244635	General	General or several functions	ABE	high_disorder
DS.BN.2.1.7	BN	2	1	7	4.81022	4.87591	4.7027	132.607	343.456	102.925	11.6861	0.765075	c.2.1.8	CoA-binding domain	0.244635	General	Small molecule binding	ABE	high_disorder
DS.EH.1.5.29	EH	1	5	29	5	4	6.12033	48.942	336.148	8.664	10	1	d.3.1.4	Transglutaminase core	0.244635	Intracellular_processes	Proteases, peptidases and their inhibitors	ABEV	high_disorder
DS.EH.1.5.13	EH	1	5	13	4	5.83333	5.52417	50.3187	12.8138	11.6542	10.8333	0.884615	d.3.1.4	Transglutaminase core	0.244635	Intracellular_processes	Proteases, peptidases and their inhibitors	ABEV	high_disorder
DS.EG.4.25.1	EG	4	25	1	2.66667	3	13.0957	103.245	335.566	24.0503	9.66667	1	c.2.1.8	CoA-binding domain	0.244635	General	Small molecule binding	ABE	high_disorder
DS.HE.6.88.1	HE	6	88	1	7	5.33333	12.6757	77.9597	342.015	93.055	18.3333	0.710526	b.52.2.2	Formate dehydrogenase/DMSO reductase, C-terminal domain	0.244635	General	General or several functions	ABE	high_disorder
DS.GE.1.1.3	GE	1	1	3	3.14474	4.35526	6.32968	85.2979	103.694	82.0739	8.5	0.954449	b.40.6.3	ABC-transporter additional domain	0.244635	Other	Function unknown	ABE	high_disorder
DS.GE.1.15.2	GE	1	15	2	3	7.83333	6.14517	21.8853	337.737	61.4463	11.8333	0.880952	d.3.1.4	Transglutaminase core	0.244635	Intracellular_processes	Proteases, peptidases and their inhibitors	ABEV	high_disorder
DS.BN.3.38.1	BN	3	38	1	5.36364	6.90909	5.81182	169.104	331.815	64.6005	15.2727	0.577005	b.40.6.3	ABC-transporter additional domain	0.244635	Other	Function unknown	ABE	high_disorder
DS.HH.3.8.12	HH	3	8	12	5.8	10	7.6098	105.57	77.6738	68.4684	18.8	0.663216	d.58.6.1	Nucleoside diphosphate kinase, NDK	0.248927	Metabolism	Nucleotide transport and metabolism	ABEV	high_disorder
DS.EG.3.29.1	EG	3	29	1	4.4	3	10.7744	69.926	355.885	78.7432	10.4	0.8	c.31.1.3	Pyruvate oxidase and decarboxylase, middle domain	0.248927	Metabolism	Other enzymes	ABEV	high_disorder
DS.EH.5.164.1	EH	5	164	1	7	12.3333	10.28	160.16	161.764	49.3913	24.3333	0.331594	c.1.2.4	Tryptophan biosynthesis enzymes	0.248927	Metabolism	Nucleotide transport and metabolism	ABE	high_disorder
DS.GE.1.3.8	GE	1	3	8	3.75	5	5.937	113.941	34.6917	102.447	9.75	1	b.33.1.1	Rieske iron-sulfur protein (ISP)	0.248927	Metabolism	Electron transfer/transport	ABEV	high_disorder
DS.GE.6.4.1	GE	6	4	1	3	4.75	11.4467	112.076	22.2065	84.0655	13.75	1	b.33.1.1	Rieske iron-sulfur protein (ISP)	0.248927	Metabolism	Electron transfer/transport	ABEV	high_disorder
DS.HG.3.17.2	HG	3	17	2	12.3333	3	10.8337	113.34	7.27	121.116	18.3333	0.416228	c.58.1.3	Malic enzyme N-domain	0.248927	Metabolism	Oxidation/Reduction	ABE	high_disorder
DS.HE.4.40.2	HE	4	40	2	13.6667	4.33333	10.495	147.896	23.9227	114.941	22	0.617521	c.58.1.3	Malic enzyme N-domain	0.248927	Metabolism	Oxidation/Reduction	ABE	high_disorder
DS.HE.4.24.7	HE	4	24	7	10.3333	5	8.697	162.601	153.555	76.8123	19.3333	0.518421	c.58.1.3	Malic enzyme N-domain	0.248927	Metabolism	Oxidation/Reduction	ABE	high_disorder
DS.HG.4.7.6	HG	4	7	6	16	3	10.8453	80.6485	358.274	109.799	23	0.566667	c.8.2.1	LeuD-like	0.248927	Metabolism	Energy production and conversion	ABE	high_disorder
DS.EG.2.9.9	EG	2	9	9	4.33333	4	6.30633	102.442	8.85433	53.2977	10.3333	1	c.8.2.1	LeuD-like	0.248927	Metabolism	Energy production and conversion	ABE	high_disorder
DS.EH.2.15.1	EH	2	15	1	4.76471	11	8.79141	125.71	13.2312	59.7978	17.7647	0.367685	c.31.1.3	Pyruvate oxidase and decarboxylase, middle domain	0.248927	Metabolism	Other enzymes	ABEV	high_disorder
DS.GE.8.3.1	GE	8	3	1	3	4	12.6137	127.006	310.812	96.689	15	0.666667	c.31.1.3	Pyruvate oxidase and decarboxylase, middle domain	0.248927	Metabolism	Other enzymes	ABEV	high_disorder
DS.HE.4.121.2	HE	4	121	2	11	4.33333	10.248	131.688	98.6367	101.569	19.3333	0.39169	c.31.1.3	Pyruvate oxidase and decarboxylase, middle domain	0.248927	Metabolism	Other enzymes	ABEV	high_disorder
DS.BN.4.107.1	BN	4	107	1	2.75	2.75	5.129	121.46	335.648	112.836	9.5	0.767857	c.8.2.1	LeuD-like	0.248927	Metabolism	Energy production and conversion	ABE	high_disorder
DS.HG.0.1.131	HG	0	1	131	8.5	3.25	2.53225	42.1418	261.931	23.4443	11.75	0.833333	d.81.1.2	Homoserine dehydrogenase-like	0.248927	Metabolism	Energy production and conversion	ABE	high_disorder
DS.BN.6.13.2	BN	6	13	2	7.6	5	8.854	153.005	349.053	147.413	18.6	0.45004	d.81.1.2	Homoserine dehydrogenase-like	0.248927	Metabolism	Energy production and conversion	ABE	high_disorder
DS.EH.4.56.2	EH	4	56	2	7.33333	11.3333	11.808	150.628	320.385	83.3687	22.6667	0.311966	c.1.2.4	Tryptophan biosynthesis enzymes	0.248927	Metabolism	Nucleotide transport and metabolism	ABE	high_disorder
DS.EH.1.5.2	EH	1	5	2	5.42857	7.78571	5.38229	33.1357	209.052	19.8916	14.2143	0.525627	c.1.2.4	Tryptophan biosynthesis enzymes	0.248927	Metabolism	Nucleotide transport and metabolism	ABE	high_disorder
DS.HE.6.52.1	HE	6	52	1	14.25	5.5	15.1278	166.409	27.101	129.196	25.75	0.289148	d.58.32.1	Vanillyl-alcohol oxidase-like	0.248927	Metabolism	Oxidation/Reduction	ABE	moderate_disorder
DS.EH.2.6.12	EH	2	6	12	5.75	14.75	7.6495	158.233	144.86	63.0183	22.5	0.360178	d.58.32.1	Vanillyl-alcohol oxidase-like	0.248927	Metabolism	Oxidation/Reduction	ABE	high_disorder
DS.HE.3.46.3	HE	3	46	3	9.66667	4	12.097	144.003	78.6193	111.282	16.6667	0.745098	c.31.1.3	Pyruvate oxidase and decarboxylase, middle domain	0.248927	Metabolism	Other enzymes	ABEV	high_disorder
DS.EH.5.24.1	EH	5	24	1	4	10.8333	11.4242	165.347	236.426	64.4682	19.8333	0.792766	c.1.2.4	Tryptophan biosynthesis enzymes	0.248927	Metabolism	Nucleotide transport and metabolism	ABE	high_disorder
DS.BK.2.12.5	BK	2	12	5	4.66667	7.66667	7.153	125.56	70.677	69.4427	14.3333	0.858974	c.8.2.1	LeuD-like	0.248927	Metabolism	Energy production and conversion	ABE	high_disorder
DS.EH.3.49.1	EH	3	49	1	6.33333	9.66667	12.7258	123.579	113.062	32.2983	19	0.762135	d.58.6.1	Nucleoside diphosphate kinase, NDK	0.248927	Metabolism	Nucleotide transport and metabolism	ABEV	high_disorder
DS.EH.1.8.5	EH	1	8	5	6.875	11.5	6.52425	126.298	51.8136	48.358	19.375	0.499953	d.58.18.6	IlvH-like	0.248927	Metabolism	Amino acid transport and metabolism	ABE	high_disorder
DS.HH.12.6.1	HH	12	6	1	9	5	5.04967	21.8283	57.9213	18.9757	26	0.75641	d.58.6.1	Nucleoside diphosphate kinase, NDK	0.248927	Metabolism	Nucleotide transport and metabolism	ABEV	high_disorder
DS.HH.3.12.7	HH	3	12	7	16	8.66667	12.3853	111.461	16.322	124.212	27.6667	0.52972	d.58.6.1	Nucleoside diphosphate kinase, NDK	0.248927	Metabolism	Nucleotide transport and metabolism	ABEV	high_disorder
DS.HE.4.73.1	HE	4	73	1	12.4444	4.77778	10.9813	166.689	21.1393	115.668	21.2222	0.314121	c.1.2.4	Tryptophan biosynthesis enzymes	0.248927	Metabolism	Nucleotide transport and metabolism	ABE	high_disorder
DS.GG.6.1.1	GG	6	1	1	5	3	11.2247	116.098	354.594	124.947	14	1	c.111.1.1	Molybdenum cofactor biosynthesis protein MoeB	0.253219	Metabolism	Coenzyme metabolism	ABEV	high_disorder
DS.HE.3.28.4	HE	3	28	4	13.2	5.2	9.6246	165.93	150.449	107.178	21.4	0.212987	c.111.1.1	Molybdenum cofactor biosynthesis protein MoeB	0.253219	Metabolism	Coenzyme metabolism	ABEV	moderate_disorder
DS.HE.5.25.5	HE	5	25	5	14.6667	5	10.3483	172.146	337.816	121.787	24.6667	0.516162	c.36.1.9	Pyruvate oxidase and decarboxylase PP module	0.253219	General	Small molecule binding	ABEV	high_disorder
DS.HE.4.22.6	HE	4	22	6	11.25	4.75	10.4283	172.764	278.542	113.202	20	0.533441	c.111.1.1	Molybdenum cofactor biosynthesis protein MoeB	0.253219	Metabolism	Coenzyme metabolism	ABEV	high_disorder
DS.EH.4.62.1	EH	4	62	1	7.6	11.6	8.564	144.812	21.231	70.3512	23.2	0.275944	d.58.4.2	Lrp/AsnC-like transcriptional regulator C-terminal domain	0.253219	Metabolism	Secondary metabolites biosynthesis, transport and catabolism	ABE	moderate_disorder
DS.EG.2.1.15	EG	2	1	15	6.1	3.1	7.4978	101.766	348.102	55.3731	11.2	0.607143	d.58.4.2	Lrp/AsnC-like transcriptional regulator C-terminal domain	0.253219	Metabolism	Secondary metabolites biosynthesis, transport and catabolism	ABE	high_disorder
DS.HE.4.47.1	HE	4	47	1	9.54545	4.18182	10.5451	145.734	128.855	110.134	17.7273	0.439922	c.76.1.3	2,3-Bisphosphoglycerate-independent phosphoglycerate mutase, catalytic domain	0.253219	Metabolism	Other enzymes	ABE	high_disorder
DS.BK.4.6.2	BK	4	6	2	3.5	4.83333	8.62033	109.846	124.681	51.8135	12.3333	0.708333	b.81.1.5	gamma-carbonic anhydrase-like	0.253219	Metabolism	Other enzymes	ABEV	high_disorder
DS.HE.5.195.1	HE	5	195	1	11.6667	5	10.2723	148.193	57.1273	82.9457	21.6667	0.355995	c.36.1.9	Pyruvate oxidase and decarboxylase PP module	0.253219	General	Small molecule binding	ABEV	high_disorder
DS.GE.2.1.24	GE	2	1	24	3	3.66667	7.922	130.8	15.0753	117.68	8.66667	1	c.36.1.5	Pyruvate oxidase and decarboxylase Pyr module	0.253219	General	Small molecule binding	ABEV	high_disorder
DS.EH.3.4.6	EH	3	4	6	5.6	13.8	9.69	130.047	12.0354	50.3494	22.4	0.399871	c.36.1.5	Pyruvate oxidase and decarboxylase Pyr module	0.253219	General	Small molecule binding	ABEV	high_disorder
DS.EG.3.27.1	EG	3	27	1	4.66667	3.16667	10.9463	142.94	64.7905	30.4513	10.8333	0.861111	c.36.1.5	Pyruvate oxidase and decarboxylase Pyr module	0.253219	General	Small molecule binding	ABEV	high_disorder
DS.EG.2.78.1	EG	2	78	1	6.33333	3	9.43733	59.9497	304.327	40.396	11.3333	1	c.36.1.5	Pyruvate oxidase and decarboxylase Pyr module	0.253219	General	Small molecule binding	ABEV	high_disorder
DS.BK.4.25.2	BK	4	25	2	2.33333	3.66667	8.35517	113.444	107.377	51.7207	10	0.880952	b.81.1.5	gamma-carbonic anhydrase-like	0.253219	Metabolism	Other enzymes	ABEV	high_disorder
DS.BK.4.10.1	BK	4	10	1	3.78947	3.63158	8.78521	121.531	103.522	62.4345	11.4211	0.878739	b.81.1.5	gamma-carbonic anhydrase-like	0.253219	Metabolism	Other enzymes	ABEV	high_disorder
DS.BK.4.1.30	BK	4	1	30	4.66667	6	7.42533	101.564	99.2143	57.6747	14.6667	0.7	b.81.1.5	gamma-carbonic anhydrase-like	0.253219	Metabolism	Other enzymes	ABEV	high_disorder
DS.BK.4.1.12	BK	4	1	12	2.42857	3.85714	8.46093	110.644	99.2294	48.4099	10.2857	0.745405	b.81.1.5	gamma-carbonic anhydrase-like	0.253219	Metabolism	Other enzymes	ABEV	high_disorder
DS.BK.3.35.1	BK	3	35	1	3.23077	4.15385	8.43708	124.162	85.1422	39.4865	10.3846	0.863905	b.81.1.5	gamma-carbonic anhydrase-like	0.253219	Metabolism	Other enzymes	ABEV	high_disorder
DS.BK.1.11.2	BK	1	11	2	5.5	7.5	5.35475	110.933	102.294	63.6295	14	0.622978	b.81.1.5	gamma-carbonic anhydrase-like	0.253219	Metabolism	Other enzymes	ABEV	high_disorder
DS.EH.10.7.1	EH	10	7	1	2.66667	11	10.5663	138.542	6.169	53.0543	23.6667	0.307971	c.36.1.9	Pyruvate oxidase and decarboxylase PP module	0.253219	General	Small molecule binding	ABEV	high_disorder
DS.EH.3.145.1	EH	3	145	1	4.66667	7.33333	8.89233	152.344	152.317	53.7777	15	0.600302	c.36.1.9	Pyruvate oxidase and decarboxylase PP module	0.253219	General	Small molecule binding	ABEV	high_disorder
DS.EH.3.151.1	EH	3	151	1	4	4	10.544	143.729	208.25	61.6233	11	1	c.36.1.9	Pyruvate oxidase and decarboxylase PP module	0.253219	General	Small molecule binding	ABEV	high_disorder
DS.EH.4.93.1	EH	4	93	1	6.25	10.25	10.3997	33.1835	61.3753	67.7422	20.5	0.303913	c.36.1.9	Pyruvate oxidase and decarboxylase PP module	0.253219	General	Small molecule binding	ABEV	high_disorder
DS.HE.3.84.2	HE	3	84	2	12	6.33333	10.8487	152.103	148.542	121.044	21.3333	0.283414	c.36.1.9	Pyruvate oxidase and decarboxylase PP module	0.253219	General	Small molecule binding	ABEV	moderate_disorder
DS.BN.2.103.1	BN	2	103	1	5	6	3.892	147.173	10.4587	96.1353	13	1	b.81.1.5	gamma-carbonic anhydrase-like	0.253219	Metabolism	Other enzymes	ABEV	high_disorder
DS.HE.5.158.1	HE	5	158	1	6	6	13.2397	161.52	165.565	122.28	17	0.0980392	c.36.1.9	Pyruvate oxidase and decarboxylase PP module	0.253219	General	Small molecule binding	ABEV	ordered
DS.HE.5.1.34	HE	5	1	34	10.3333	5.33333	11.0667	163.949	148.476	87.0537	20.6667	0.13962	c.76.1.3	2,3-Bisphosphoglycerate-independent phosphoglycerate mutase, catalytic domain	0.253219	Metabolism	Other enzymes	ABE	moderate_disorder
DS.HE.4.5.26	HE	4	5	26	10	4	11.2007	150.645	145.935	110.199	18	0.782609	c.36.1.9	Pyruvate oxidase and decarboxylase PP module	0.253219	General	Small molecule binding	ABEV	high_disorder
DS.BN.6.54.1	BN	6	54	1	6	7.2	4.6022	159.586	9.9956	97.3758	19.2	0.23	d.58.4.2	Lrp/AsnC-like transcriptional regulator C-terminal domain	0.253219	Metabolism	Secondary metabolites biosynthesis, transport and catabolism	ABE	moderate_disorder
DS.HG.1.2.10	HG	1	2	10	11	3.0625	5.06675	111.675	50.8942	61.1139	15.0625	0.792314	a.78.1.1	GntR ligand-binding domain-like	0.253219	Regulation	DNA-binding (transcription factors)	ABE	high_disorder
DS.HH.3.5.9	HH	3	5	9	13.6667	12.6667	6.81	160.554	118.266	81.4627	29.3333	0.510947	a.78.1.1	GntR ligand-binding domain-like	0.253219	Regulation	DNA-binding (transcription factors)	ABE	high_disorder
DS.HG.0.1.115	HG	0	1	115	12.4	3	2.5152	6.9584	274.552	69.3722	15.4	0.750607	a.78.1.1	GntR ligand-binding domain-like	0.253219	Regulation	DNA-binding (transcription factors)	ABE	high_disorder
DS.HH.5.19.2	HH	5	19	2	14.3333	9.83333	14.4697	115.073	320.659	115.488	29.1667	0.306803	a.4.5.32	Lrp/AsnC-like transcriptional regulator N-terminal domain	0.253219	Regulation	DNA-binding (transcription factors)	ABEV	high_disorder
DS.GH.2.3.30	GH	2	3	30	3	16.6667	8.47767	81.745	357.247	54.0427	21.6667	0.623457	d.110.2.2	IclR ligand-binding domain-like	0.257511	Regulation	Signal transduction	ABE	high_disorder
DS.BN.6.52.1	BN	6	52	1	4	9.16667	5.72667	174.549	332.478	62.5992	19.1667	0.623684	d.110.2.2	IclR ligand-binding domain-like	0.257511	Regulation	Signal transduction	ABE	high_disorder
DS.BN.5.6.4	BN	5	6	4	6.6	4.8	6.5079	175.057	305.016	132.275	16.4	0.563925	d.210.1.1	Argininosuccinate synthetase, C-terminal domain	0.261803	Metabolism	Other enzymes	ABE	high_disorder
DS.EH.2.1.52	EH	2	1	52	4.57143	8.28571	8.55557	141.834	146.123	36.6266	14.8571	0.818277	d.210.1.1	Argininosuccinate synthetase, C-terminal domain	0.261803	Metabolism	Other enzymes	ABE	high_disorder
DS.HE.2.34.3	HE	2	34	3	5	5.33333	6.549	85.7233	134.341	30.524	12.3333	0.690476	c.113.1.1	HemD-like	0.266094	Metabolism	Coenzyme metabolism	ABE	high_disorder
DS.HE.5.1.35	HE	5	1	35	13	5.33333	9.67467	141.58	131.143	77.9913	23.3333	0.337686	c.113.1.1	HemD-like	0.266094	Metabolism	Coenzyme metabolism	ABE	high_disorder
DS.EH.2.39.1	EH	2	39	1	6.25	6.25	6.899	140.668	55.95	40.096	14.5	0.766667	c.113.1.1	HemD-like	0.266094	Metabolism	Coenzyme metabolism	ABE	high_disorder
DS.EG.2.13.5	EG	2	13	5	4.66667	3	9.177	59.7103	338.619	58.749	9.66667	1	c.113.1.1	HemD-like	0.266094	Metabolism	Coenzyme metabolism	ABE	high_disorder
DS.BK.1.4.10	BK	1	4	10	5	6.4	5.6938	60.3466	128.866	31.3926	12.4	0.646667	c.113.1.1	HemD-like	0.266094	Metabolism	Coenzyme metabolism	ABE	high_disorder
DS.HH.3.8.15	HH	3	8	15	11.5	5.5	6.84225	107.28	54.7593	86.314	20	0.432959	c.113.1.1	HemD-like	0.266094	Metabolism	Coenzyme metabolism	ABE	high_disorder
DS.GE.2.63.1	GE	2	63	1	3	4.33333	8.54633	111.673	54.2693	107.036	9.33333	1	c.113.1.1	HemD-like	0.266094	Metabolism	Coenzyme metabolism	ABE	high_disorder
DS.HE.3.18.11	HE	3	18	11	13	6	10.3883	167.636	255.691	126.462	22	0.257576	c.58.1.5	Shikimate dehydrogenase-like	0.270386	Metabolism	Oxidation/Reduction	ABE	moderate_disorder
DS.HG.1.1.60	HG	1	1	60	7	3	4.56767	75.7983	347.327	33.9623	11	1	a.100.1.12	TyrA dimerization domain-like	0.270386	Metabolism	Energy production and conversion	ABE	high_disorder
DS.HE.4.6.11	HE	4	6	11	14.25	5.75	9.278	167.627	201.136	113.263	24	0.252273	c.58.1.5	Shikimate dehydrogenase-like	0.270386	Metabolism	Oxidation/Reduction	ABE	moderate_disorder
DS.GH.1.1.35	GH	1	1	35	3.5	13.1667	6.33067	63.1917	167.268	80.7027	17.6667	0.534392	c.1.2.1	Histidine biosynthesis enzymes	0.270386	Metabolism	Nucleotide transport and metabolism	ABE	high_disorder
DS.HH.1.1.34	HH	1	1	34	15.2222	17.1111	3.32056	21.66	52.8538	63.1154	33.3333	0.268403	a.100.1.12	TyrA dimerization domain-like	0.270386	Metabolism	Energy production and conversion	ABE	moderate_disorder
DS.HH.8.6.1	HH	8	6	1	12	21	13.2537	125.59	304.966	78.0443	41	0.0168961	f.44.1.1	Ammonium transporter	0.270386	Intracellular_processes	Transport	ABE	ordered
DS.HH.1.1.68	HH	1	1	68	11.5	7.5	3.5999	31.7202	192.15	69.3021	20	0.483694	f.44.1.1	Ammonium transporter	0.270386	Intracellular_processes	Transport	ABE	high_disorder
DS.GE.2.2.13	GE	2	2	13	5.28571	5	7.15471	127.141	100.848	65.8371	12.2857	0.696186	c.58.1.5	Shikimate dehydrogenase-like	0.270386	Metabolism	Oxidation/Reduction	ABE	high_disorder
DS.HG.0.1.82	HG	0	1	82	11	3.125	2.39675	7.3805	251.399	65.6167	14.125	0.705263	f.44.1.1	Ammonium transporter	0.270386	Intracellular_processes	Transport	ABE	high_disorder
DS.HH.3.1.11	HH	3	1	11	18.5714	6.42857	10.8217	126.044	8.52571	128.56	28	0.353658	a.100.1.4	UDP-glucose/GDP-mannose dehydrogenase dimerisation domain	0.274678	Metabolism	Energy production and conversion	ABEV	high_disorder
DS.HE.4.93.2	HE	4	93	2	8.33333	6	7.12367	129.446	109.068	40.2363	18.3333	0.483333	d.258.1.1	Chorismate synthase, AroC	0.274678	Metabolism	Other enzymes	ABEV	high_disorder
DS.HE.3.19.5	HE	3	19	5	12.6	6	8.379	155.22	97.0724	96.6454	21.6	0.214113	d.14.1.9	Imidazole glycerol phosphate dehydratase	0.274678	Information	Translation, ribosomes, ribosome biogenesis; tRNA metabolism	ABE	moderate_disorder
DS.BN.2.6.30	BN	2	6	30	7.2	6.2	5.174	155.06	174.426	114.891	15.4	0.400321	d.96.1.2	6-pyruvoyl tetrahydropterin synthase	0.274678	Metabolism	Nucleotide transport and metabolism	ABEV	high_disorder
DS.EH.0.1.75	EH	0	1	75	3.5	4	3.727	101.441	353.875	10.8665	7.5	1	d.96.1.2	6-pyruvoyl tetrahydropterin synthase	0.274678	Metabolism	Nucleotide transport and metabolism	ABEV	high_disorder
DS.HE.2.31.4	HE	2	31	4	7	3.33333	8.811	97.7403	119.742	108.854	12.3333	0.777778	d.258.1.1	Chorismate synthase, AroC	0.274678	Metabolism	Other enzymes	ABEV	high_disorder
DS.GH.2.7.6	GH	2	7	6	3	9	6.602	82.9977	208.944	57.0138	14	0.468407	d.258.1.1	Chorismate synthase, AroC	0.274678	Metabolism	Other enzymes	ABEV	high_disorder
DS.EG.2.71.1	EG	2	71	1	6	6	5.079	74.328	65.5063	107.301	14	0.785714	d.258.1.1	Chorismate synthase, AroC	0.274678	Metabolism	Other enzymes	ABEV	high_disorder
DS.HH.5.1.4	HH	5	1	4	14.2	10.1	9.462	143.016	23.2531	96.0343	29.3	0.326007	c.1.10.3	5-aminolaevulinate dehydratase, ALAD (porphobilinogen synthase)	0.274678	Metabolism	Carbohydrate transport and metabolism	ABE	high_disorder
DS.EH.1.2.29	EH	1	2	29	6.55556	10.2222	6.38689	84.0356	126.81	24.1362	17.7778	0.544881	c.26.3.1	UDP-glucose/GDP-mannose dehydrogenase C-terminal domain	0.274678	Metabolism	Energy production and conversion	ABEV	high_disorder
DS.BK.4.43.1	BK	4	43	1	2	6.57143	9.22214	127.657	80.9927	69.4623	12.5714	0.901099	d.258.1.1	Chorismate synthase, AroC	0.274678	Metabolism	Other enzymes	ABEV	high_disorder
DS.BN.2.4.14	BN	2	4	14	3.64286	2.85714	4.79193	141.55	346.94	100.616	8.5	0.802198	d.14.1.9	Imidazole glycerol phosphate dehydratase	0.274678	Information	Translation, ribosomes, ribosome biogenesis; tRNA metabolism	ABE	high_disorder
DS.HE.2.7.8	HE	2	7	8	12	5.5	8.668	158.456	63.3375	105.399	19.5	0.190152	d.14.1.9	Imidazole glycerol phosphate dehydratase	0.274678	Information	Translation, ribosomes, ribosome biogenesis; tRNA metabolism	ABE	moderate_disorder
DS.HE.3.1.18	HE	3	1	18	11	3.2	7.4908	129.857	131.18	84.0402	17.2	0.464812	c.26.3.1	UDP-glucose/GDP-mannose dehydrogenase C-terminal domain	0.274678	Metabolism	Energy production and conversion	ABEV	high_disorder
DS.EH.5.22.2	EH	5	22	2	8.66667	11.6667	14.4253	125.475	355.564	99.5137	25.3333	0.452549	d.58.18.7	SP0238-like	0.27897	Metabolism	Amino acid transport and metabolism	ABE	high_disorder
DS.HG.0.4.1	HG	0	4	1	13	3	4.1834	42.3342	262.162	77.8392	16	0.2625	e.22.1.1	Dehydroquinate synthase, DHQS	0.27897	Metabolism	Oxidation/Reduction	ABEV	moderate_disorder
DS.BN.2.11.18	BN	2	11	18	6.75	5.75	5.1395	167.826	329.021	112.575	14.5	0.666667	e.22.1.1	Dehydroquinate synthase, DHQS	0.27897	Metabolism	Oxidation/Reduction	ABEV	high_disorder
DS.HH.1.1.80	HH	1	1	80	7.25	8.875	4.44175	54.6328	76.8841	81.324	17.125	0.597533	c.1.22.1	Uroporphyrinogen decarboxylase, UROD	0.27897	Metabolism	Coenzyme metabolism	ABE	high_disorder
DS.BN.2.9.18	BN	2	9	18	6	8	4.631	172.903	57.493	78.4713	16	0.729167	e.22.1.1	Dehydroquinate synthase, DHQS	0.27897	Metabolism	Oxidation/Reduction	ABEV	high_disorder
DS.EG.2.69.1	EG	2	69	1	6.66667	4	6.83233	114.128	42.058	93.4097	12.6667	1	e.22.1.1	Dehydroquinate synthase, DHQS	0.27897	Metabolism	Oxidation/Reduction	ABEV	high_disorder
DS.HE.3.92.2	HE	3	92	2	11	4.66667	9.74167	167.505	106.901	108.238	18.6667	0.433155	c.82.1.2	L-histidinol dehydrogenase HisD	0.27897	Metabolism	Oxidation/Reduction	ABE	high_disorder
DS.GH.2.16.1	GH	2	16	1	6	10.25	7.2485	36.4757	14.8562	48.0085	18.25	0.373538	e.22.1.1	Dehydroquinate synthase, DHQS	0.27897	Metabolism	Oxidation/Reduction	ABEV	high_disorder
DS.EH.5.50.1	EH	5	50	1	9	14	10.7792	152.938	287.116	98.321	28	0.508768	d.161.1.1	ADC synthase	0.27897	Metabolism	Other enzymes	ABEV	high_disorder
DS.EG.1.1.12	EG	1	1	12	4.76923	3.26923	6.30581	69.0684	244.452	13.796	9.03846	0.882581	d.161.1.1	ADC synthase	0.27897	Metabolism	Other enzymes	ABEV	high_disorder
DS.HE.4.176.1	HE	4	176	1	12	5.75	9.39425	162.344	16.9662	101.455	21.75	0.520694	c.1.22.1	Uroporphyrinogen decarboxylase, UROD	0.27897	Metabolism	Coenzyme metabolism	ABE	high_disorder
DS.HE.3.12.9	HE	3	12	9	10.6667	4.33333	10.659	168.556	110.511	99.5177	18	0.571953	c.82.1.2	L-histidinol dehydrogenase HisD	0.27897	Metabolism	Oxidation/Reduction	ABE	high_disorder
DS.BN.2.11.29	BN	2	11	29	8	8.33333	5.53533	171.982	246.279	114.01	18.3333	0.805556	c.82.1.2	L-histidinol dehydrogenase HisD	0.27897	Metabolism	Oxidation/Reduction	ABE	high_disorder
DS.HH.2.15.3	HH	2	15	3	7.2	13.2	8.299	114.484	83.3958	35.0936	22.4	0.664137	c.82.1.2	L-histidinol dehydrogenase HisD	0.27897	Metabolism	Oxidation/Reduction	ABE	high_disorder
DS.HH.3.11.11	HH	3	11	11	10	8	7.53433	115.416	74.6623	106.493	21	0.655185	c.53.2.1	beta-carbonic anhydrase, cab	0.283262	Metabolism	Other enzymes	ABEV	high_disorder
DS.EH.1.21.3	EH	1	21	3	4.25	8.5	5.75525	34.4988	287.494	9.54425	13.75	0.661458	c.57.1.1	MogA-like	0.283262	Metabolism	Coenzyme metabolism	ABE	high_disorder
DS.EH.10.3.1	EH	10	3	1	5	5.75	9.4625	149.489	63.424	81.9223	20.75	0.8625	c.57.1.1	MogA-like	0.283262	Metabolism	Coenzyme metabolism	ABE	high_disorder
DS.EH.1.3.22	EH	1	3	22	2.5	9.5	5.575	30.4133	333.682	10.5768	13	0.312745	c.57.1.1	MogA-like	0.283262	Metabolism	Coenzyme metabolism	ABE	high_disorder
DS.BN.2.2.3	BN	2	2	3	6.66387	7.15126	4.85385	143.538	338.17	97.2251	15.8151	0.522461	c.57.1.1	MogA-like	0.283262	Metabolism	Coenzyme metabolism	ABE	high_disorder
DS.EH.2.7.5	EH	2	7	5	4.1	7.5	9.6988	97.7084	157.704	16.3438	13.6	0.756364	d.61.1.2	2'-5' RNA ligase LigT	0.283262	Metabolism	Other enzymes	ABEV	high_disorder
DS.EH.1.1.32	EH	1	1	32	4.27778	11.0556	6.35189	95.8247	143.471	12.127	16.3333	0.741905	b.168.1.1	HisI-like	0.283262	Metabolism	Amino acid transport and metabolism	ABE	high_disorder
DS.HG.3.7.4	HG	3	7	4	12	4.5	6.5875	145.638	35.374	55.243	19.5	0.348026	c.57.1.1	MogA-like	0.283262	Metabolism	Coenzyme metabolism	ABE	high_disorder
DS.EG.2.5.9	EG	2	5	9	7.25	4	9.53625	113.597	39.753	36.023	13.25	1	d.61.1.2	2'-5' RNA ligase LigT	0.283262	Metabolism	Other enzymes	ABEV	high_disorder
DS.GH.2.8.5	GH	2	8	5	3	15.5	9.314	168.333	307.055	101.046	20.5	0.623211	d.328.1.1	CorA soluble domain-like	0.283262	Intracellular_processes	Inorganic ion transport and metabolism	ABEV	high_disorder
DS.HH.5.70.1	HH	5	70	1	5.5	16.5	11.349	127.281	328.749	35.4885	27	0.400421	c.53.2.1	beta-carbonic anhydrase, cab	0.283262	Metabolism	Other enzymes	ABEV	high_disorder
DS.HH.2.1.111	HH	2	1	111	10	10.3333	3.70333	8.28233	170.295	28.851	22.3333	0.604938	a.100.1.2	Acetohydroxy acid isomeroreductase (ketol-acid reductoisomerase, KARI)	0.283262	Metabolism	Energy production and conversion	ABE	high_disorder
DS.HH.2.1.93	HH	2	1	93	13.3333	5.66667	6.47867	93.2917	96.2797	18.2923	21	0.442943	c.53.2.1	beta-carbonic anhydrase, cab	0.283262	Metabolism	Other enzymes	ABEV	high_disorder
DS.HH.1.3.13	HH	1	3	13	12.2222	10	5.56556	58.4144	233.541	40.5032	23.2222	0.438793	c.53.2.1	beta-carbonic anhydrase, cab	0.283262	Metabolism	Other enzymes	ABEV	high_disorder
DS.HE.7.31.1	HE	7	31	1	4	6	12.5297	120.924	294.504	147.074	17	0.838235	c.53.2.1	beta-carbonic anhydrase, cab	0.283262	Metabolism	Other enzymes	ABEV	high_disorder
DS.HE.5.21.3	HE	5	21	3	8.5	5.5	11.4795	130.322	119.8	104.38	19	0.65	c.53.2.1	beta-carbonic anhydrase, cab	0.283262	Metabolism	Other enzymes	ABEV	high_disorder
DS.EH.3.77.1	EH	3	77	1	7	8	8.3828	64.656	152.036	68.504	18	0.0363636	c.53.2.1	beta-carbonic anhydrase, cab	0.283262	Metabolism	Other enzymes	ABEV	ordered
DS.EG.2.66.1	EG	2	66	1	3.66667	3	8.86767	148.275	95.5147	39.2987	8.66667	0.666667	c.53.2.1	beta-carbonic anhydrase, cab	0.283262	Metabolism	Other enzymes	ABEV	high_disorder
DS.EG.0.26.1	EG	0	26	1	5.25	3	4.083	125.093	72.8135	26.3568	8.25	1	c.53.2.1	beta-carbonic anhydrase, cab	0.283262	Metabolism	Other enzymes	ABEV	high_disorder
DS.HH.4.4.7	HH	4	4	7	12.5	10.5	8.91425	148.429	13.6825	95.717	27	0.288027	a.100.1.2	Acetohydroxy acid isomeroreductase (ketol-acid reductoisomerase, KARI)	0.283262	Metabolism	Energy production and conversion	ABE	moderate_disorder
DS.HH.1.10.2	HH	1	10	2	17.3333	7.66667	4.843	69.8357	115.838	98.0857	26	0.514212	a.100.1.2	Acetohydroxy acid isomeroreductase (ketol-acid reductoisomerase, KARI)	0.283262	Metabolism	Energy production and conversion	ABE	high_disorder
DS.EH.1.2.21	EH	1	2	21	5.75	10.5	6.45925	93.337	111.049	26.268	17.25	0.441542	d.61.1.2	2'-5' RNA ligase LigT	0.283262	Metabolism	Other enzymes	ABEV	high_disorder
DS.HH.1.1.40	HH	1	1	40	11.4118	9.41176	3.53818	17.2514	165.247	74.6052	21.8235	0.333684	a.100.1.2	Acetohydroxy acid isomeroreductase (ketol-acid reductoisomerase, KARI)	0.283262	Metabolism	Energy production and conversion	ABE	high_disorder
DS.BK.3.3.4	BK	3	3	4	4.66667	4.16667	10.403	82.013	80.2302	53.1497	11.8333	0.61038	b.85.6.1	MoeA C-terminal domain-like	0.287554	Metabolism	Coenzyme metabolism	ABE	high_disorder
DS.HE.3.26.2	HE	3	26	2	10.25	4.25	6.62675	150.139	96.3529	68.8077	17.5	0.348751	c.106.1.1	SurE-like	0.287554	Other	Function unknown	ABE	high_disorder
DS.HH.4.5.2	HH	4	5	2	17.1	15.1	11.0209	128.052	207.416	113.206	36.2	0.2496	e.22.1.2	Iron-containing alcohol dehydrogenase	0.287554	Metabolism	Oxidation/Reduction	ABE	moderate_disorder
DS.BN.3.88.1	BN	3	88	1	6	6	4.915	175.02	353.138	96.3703	15	0.484722	c.55.1.5	BadF/BadG/BcrA/BcrD-like	0.287554	Metabolism	Other enzymes	ABEV	high_disorder
DS.HE.4.120.2	HE	4	120	2	6.66667	4	7.815	163.019	154.279	105.335	14.6667	0.75	c.106.1.1	SurE-like	0.287554	Other	Function unknown	ABE	high_disorder
DS.HH.2.1.97	HH	2	1	97	7.33333	6.33333	5.87	12.047	335.681	16.335	15.6667	0.695238	c.55.1.5	BadF/BadG/BcrA/BcrD-like	0.287554	Metabolism	Other enzymes	ABEV	high_disorder
DS.HE.3.2.4	HE	3	2	4	10.1538	4.55769	10.9241	128.179	27.3101	107.569	17.7115	0.279965	e.22.1.2	Iron-containing alcohol dehydrogenase	0.287554	Metabolism	Oxidation/Reduction	ABE	moderate_disorder
DS.HH.2.1.99	HH	2	1	99	6.33333	11	6.471	19.538	63.8407	36.696	19.3333	0.319755	c.55.1.5	BadF/BadG/BcrA/BcrD-like	0.287554	Metabolism	Other enzymes	ABEV	high_disorder
DS.EH.1.9.5	EH	1	9	5	6	13.8	5.8274	150.401	100.128	63.8742	20.8	0.391948	e.22.1.2	Iron-containing alcohol dehydrogenase	0.287554	Metabolism	Oxidation/Reduction	ABE	high_disorder
DS.HE.4.103.2	HE	4	103	2	13	4.33333	8.14567	161.247	155.141	118.463	21.3333	0.328283	c.106.1.1	SurE-like	0.287554	Other	Function unknown	ABE	high_disorder
DS.BK.3.84.1	BK	3	84	1	4.83333	2.83333	9.74667	98.7488	84.514	52.3775	10.6667	0.704365	b.85.6.1	MoeA C-terminal domain-like	0.287554	Metabolism	Coenzyme metabolism	ABE	high_disorder
DS.BK.4.126.1	BK	4	126	1	2.33333	8.33333	9.00433	113.174	143.598	56.231	14.6667	0.479167	b.85.6.1	MoeA C-terminal domain-like	0.287554	Metabolism	Coenzyme metabolism	ABE	high_disorder
DS.GE.3.4.1	GE	3	4	1	3	4.46667	10.8002	50.2559	32.8801	65.6723	10.4667	0.945833	e.22.1.2	Iron-containing alcohol dehydrogenase	0.287554	Metabolism	Oxidation/Reduction	ABE	high_disorder
DS.BN.8.11.1	BN	8	11	1	4.7	5.3	4.841	157.882	344.405	99.7772	18	0.716923	b.85.6.1	MoeA C-terminal domain-like	0.287554	Metabolism	Coenzyme metabolism	ABE	high_disorder
DS.HH.3.5.16	HH	3	5	16	9	23.3333	7.95567	110.464	193.686	93.44	35.3333	0.283534	c.55.1.5	BadF/BadG/BcrA/BcrD-like	0.287554	Metabolism	Other enzymes	ABEV	moderate_disorder
DS.GE.1.4.12	GE	1	4	12	3	4.5	5.1625	21.498	151.415	72.7662	8.5	1	c.8.2.2	IlvD/EDD C-terminal domain-like	0.287554	Metabolism	Energy production and conversion	ABE	high_disorder
DS.HH.5.1.23	HH	5	1	23	9.33333	4.33333	10.077	143.563	333.258	102.269	18.6667	0.456494	d.142.1.5	Pyruvate phosphate dikinase, N-terminal domain	0.291845	Metabolism	Coenzyme metabolism	ABEV	high_disorder
DS.BN.2.3.6	BN	2	3	6	6.91803	5.90164	4.83625	156.877	340.863	102.664	14.8197	0.581272	d.157.1.1	Zn metallo-beta-lactamase	0.291845	Metabolism	Oxidation/Reduction	ABEV	high_disorder
DS.BN.2.39.1	BN	2	39	1	7.28571	6.85714	5.22971	162.534	318.952	116.055	16.1429	0.472939	d.157.1.1	Zn metallo-beta-lactamase	0.291845	Metabolism	Oxidation/Reduction	ABEV	high_disorder
DS.HH.7.20.1	HH	7	20	1	6	6	17.3178	144.752	52.7668	141.156	19	0.486842	c.1.9.9	SAH/MTA deaminase-like	0.291845	Metabolism	Other enzymes	ABEV	high_disorder
DS.BK.3.62.1	BK	3	62	1	5.28571	5.14286	8.31871	119.217	129.162	75.7204	13.4286	0.696042	b.58.1.2	MOSC (MOCO sulphurase C-terminal) domain	0.291845	Metabolism	Carbohydrate transport and metabolism	ABE	high_disorder
DS.EH.1.5.30	EH	1	5	30	4	8.33333	4.29567	54.7677	160.576	19.075	13.3333	0.711111	b.58.1.2	MOSC (MOCO sulphurase C-terminal) domain	0.291845	Metabolism	Carbohydrate transport and metabolism	ABE	high_disorder
DS.EH.1.6.5	EH	1	6	5	3.81818	5.63636	4.65345	63.7611	149.612	35.5407	10.4545	0.843357	d.142.1.5	Pyruvate phosphate dikinase, N-terminal domain	0.291845	Metabolism	Coenzyme metabolism	ABEV	high_disorder
DS.HH.2.1.9	HH	2	1	9	4.27273	6.45455	6.51745	31.5905	113.578	58.461	12.7273	0.860071	d.157.1.1	Zn metallo-beta-lactamase	0.291845	Metabolism	Oxidation/Reduction	ABEV	high_disorder
DS.BN.11.3.1	BN	11	3	1	5	4	4.96025	151.361	340.063	99.1753	20	0.391604	d.157.1.1	Zn metallo-beta-lactamase	0.291845	Metabolism	Oxidation/Reduction	ABEV	high_disorder
DS.HE.5.189.1	HE	5	189	1	12	4	12.4523	154.296	33.358	84.0743	21	0.573913	d.157.1.1	Zn metallo-beta-lactamase	0.291845	Metabolism	Oxidation/Reduction	ABEV	high_disorder
DS.BK.3.56.1	BK	3	56	1	3.5	6.75	9.45225	138.827	47.6085	56.282	13.25	0.426042	b.103.1.1	MoeA N-terminal region -like	0.291845	Metabolism	Coenzyme metabolism	ABE	high_disorder
DS.HE.5.19.2	HE	5	19	2	8.25	3.25	8.95725	155.311	119.896	106.481	16.5	0.826087	c.4.1.1	N-terminal domain of adrenodoxin reductase-like	0.291845	General	Small molecule binding	ABEV	high_disorder
DS.HG.0.1.58	HG	0	1	58	4.83333	3	3.47025	7.87042	285.243	95.213	7.83333	0.952381	d.142.1.5	Pyruvate phosphate dikinase, N-terminal domain	0.291845	Metabolism	Coenzyme metabolism	ABEV	high_disorder
DS.BK.3.12.1	BK	3	12	1	5.26667	4.46667	12.4362	41.5275	64.6781	17.0576	12.7333	0.72666	d.58.30.1	6-hydroxymethyl-7,8-dihydropterin pyrophosphokinase, HPPK	0.291845	Metabolism	Coenzyme metabolism	ABEV	high_disorder
DS.GH.4.25.1	GH	4	25	1	3	17.6667	9.008	137.326	54.334	109.061	24.6667	0.481083	c.42.1.1	Arginase-like amidino hydrolases	0.291845	Metabolism	Amino acid transport and metabolism	ABEV	high_disorder
DS.EG.3.25.1	EG	3	25	1	7.66667	3	11.8393	37.0897	321.539	37.4317	13.6667	0.578755	c.42.1.1	Arginase-like amidino hydrolases	0.291845	Metabolism	Amino acid transport and metabolism	ABEV	high_disorder
DS.EG.2.46.1	EG	2	46	1	6.6	3	8.7782	129.662	355.76	73.8532	11.6	1	c.42.1.1	Arginase-like amidino hydrolases	0.291845	Metabolism	Amino acid transport and metabolism	ABEV	high_disorder
DS.HH.2.1.96	HH	2	1	96	6.33333	7.33333	3.75733	24.492	105.307	52.136	15.6667	0.233786	c.1.9.9	SAH/MTA deaminase-like	0.291845	Metabolism	Other enzymes	ABEV	moderate_disorder
DS.HG.0.1.177	HG	0	1	177	6	3	2.563	34.8927	235.03	58.863	9	1	c.1.9.9	SAH/MTA deaminase-like	0.291845	Metabolism	Other enzymes	ABEV	high_disorder
DS.HE.3.19.1	HE	3	19	1	10.9	5.43333	8.3324	155.072	124.155	98.3008	19.3333	0.332217	c.1.9.9	SAH/MTA deaminase-like	0.291845	Metabolism	Other enzymes	ABEV	high_disorder
DS.HE.2.14.1	HE	2	14	1	11.6486	5.81081	5.15897	111.856	142.984	73.8876	19.4595	0.447424	c.1.9.9	SAH/MTA deaminase-like	0.291845	Metabolism	Other enzymes	ABEV	high_disorder
DS.GH.1.3.5	GH	1	3	5	3.10526	14.6842	6.26689	125.962	160.273	81.9883	18.7895	0.53749	c.1.9.9	SAH/MTA deaminase-like	0.291845	Metabolism	Other enzymes	ABEV	high_disorder
DS.EH.5.104.1	EH	5	104	1	4.75	9.5	14.511	153.085	188.775	70.6585	19.25	0.691447	c.1.9.9	SAH/MTA deaminase-like	0.291845	Metabolism	Other enzymes	ABEV	high_disorder
DS.BK.1.28.1	BK	1	28	1	4.75	3.5	5.63825	26.8483	51.604	24.3347	9.25	1	c.1.9.9	SAH/MTA deaminase-like	0.291845	Metabolism	Other enzymes	ABEV	high_disorder
DS.BN.4.2.9	BN	4	2	9	5.125	5.375	4.87906	153.816	191.875	102.324	14.5	0.803328	d.58.30.1	6-hydroxymethyl-7,8-dihydropterin pyrophosphokinase, HPPK	0.291845	Metabolism	Coenzyme metabolism	ABEV	high_disorder
DS.BN.8.12.1	BN	8	12	1	5.22222	5.77778	4.74033	130.513	343.146	103.33	19	0.522802	b.92.1.4	SAH/MTA deaminase-like	0.291845	Metabolism	Other enzymes	ABE	high_disorder
DS.EH.5.58.1	EH	5	58	1	5.8	14	11.3	128.089	333.782	84.6172	24.8	0.385287	d.15.3.1	MoaD	0.291845	Other	Function unknown	ABE	high_disorder
DS.EH.2.24.4	EH	2	24	4	6.33333	6.66667	7.55133	130.255	122.518	24.756	15	0.244048	d.15.3.1	MoaD	0.291845	Other	Function unknown	ABE	moderate_disorder
DS.BN.2.8.20	BN	2	8	20	3	5.25	5.09575	121.183	328.459	97.2635	10.25	0.926471	d.15.3.1	MoaD	0.291845	Other	Function unknown	ABE	high_disorder
DS.HE.4.9.16	HE	4	9	16	7.25	4	7.572	159.65	114.269	61.7455	15.25	0.676471	c.66.1.22	Precorrin-6Y methyltransferase (CbiT)	0.291845	Metabolism	Transferases	ABEV	high_disorder
DS.HE.5.58.2	HE	5	58	2	11.6667	5.33333	12.5627	106.587	64.9623	61.3113	22	0.286111	c.66.1.22	Precorrin-6Y methyltransferase (CbiT)	0.291845	Metabolism	Transferases	ABEV	moderate_disorder
DS.EH.2.23.2	EH	2	23	2	2.33333	13.1667	8.416	15.5078	346.36	23.9192	17.5	0.513456	c.57.1.2	MoeA central domain-like	0.291845	Metabolism	Coenzyme metabolism	ABE	high_disorder
DS.EG.4.10.1	EG	4	10	1	3.83333	3	15.2563	79.9912	341.469	34.5762	10.8333	0.843137	d.96.1.3	DHN aldolase/epimerase	0.291845	Metabolism	Nucleotide transport and metabolism	ABEV	high_disorder
DS.EH.3.22.3	EH	3	22	3	7.33333	12.6667	9.184	146.795	113.434	35.9713	23	0.59552	c.57.1.2	MoeA central domain-like	0.291845	Metabolism	Coenzyme metabolism	ABE	high_disorder
DS.EH.3.1.25	EH	3	1	25	4.83333	16.8333	10.6133	141.836	356.906	40.5478	24.6667	0.384477	c.57.1.2	MoeA central domain-like	0.291845	Metabolism	Coenzyme metabolism	ABE	high_disorder
DS.BN.2.1.22	BN	2	1	22	6.01852	6.44444	4.79406	133.434	334.134	102.188	14.463	0.659383	b.92.1.4	SAH/MTA deaminase-like	0.291845	Metabolism	Other enzymes	ABE	high_disorder
DS.EH.2.26.1	EH	2	26	1	6	9.5	8.5975	52.6352	53.4522	22.994	17.5	0.647003	d.96.1.3	DHN aldolase/epimerase	0.291845	Metabolism	Nucleotide transport and metabolism	ABEV	high_disorder
DS.EH.3.8.1	EH	3	8	1	6.29412	11.5882	10.4572	126.77	9.46265	69.1344	20.8824	0.415167	d.58.30.1	6-hydroxymethyl-7,8-dihydropterin pyrophosphokinase, HPPK	0.291845	Metabolism	Coenzyme metabolism	ABEV	high_disorder
DS.BK.1.1.9	BK	1	1	9	3.75	3.5	6.45383	60.6363	77.9278	27.5604	8.25	0.972222	c.8.1.1	Pyruvate phosphate dikinase, central domain	0.291845	Regulation	Kinases and phosphatases and inhibitors	ABEV	high_disorder
DS.HG.0.1.35	HG	0	1	35	4.45455	4.63636	2.77082	36.2796	70.6519	82.8395	9.09091	0.920455	d.58.30.1	6-hydroxymethyl-7,8-dihydropterin pyrophosphokinase, HPPK	0.291845	Metabolism	Coenzyme metabolism	ABEV	high_disorder
DS.BN.2.2.90	BN	2	2	90	3.66667	3.66667	4.522	155.756	9.41867	97.6797	9.33333	1	a.96.1.3	DNA repair glycosylase, 2 C-terminal domains	0.291845	Information	DNA replication, recombination, repair	ABEV	high_disorder
DS.HG.2.17.1	HG	2	17	1	8.2	3.4	9.0526	147.649	335.157	99.4022	13.6	0.93	d.96.1.3	DHN aldolase/epimerase	0.291845	Metabolism	Nucleotide transport and metabolism	ABEV	high_disorder
DS.HE.5.5.9	HE	5	5	9	15.3333	5.33333	11.083	147.321	333.251	126.851	25.6667	0.380872	d.96.1.3	DHN aldolase/epimerase	0.291845	Metabolism	Nucleotide transport and metabolism	ABEV	high_disorder
DS.EH.2.15.3	EH	2	15	3	5.4	11	8.3148	145.093	13.271	70.4068	18.4	0.318719	c.66.1.22	Precorrin-6Y methyltransferase (CbiT)	0.291845	Metabolism	Transferases	ABEV	high_disorder
DS.BK.3.39.2	BK	3	39	2	4.66667	5	7.756	112.144	148.52	93.033	12.6667	0.4	c.8.1.1	Pyruvate phosphate dikinase, central domain	0.291845	Regulation	Kinases and phosphatases and inhibitors	ABEV	high_disorder
DS.HE.1.2.5	HE	1	2	5	10.6	5.1	4.35	33.2923	152.502	51.2787	16.7	0.620257	c.66.1.22	Precorrin-6Y methyltransferase (CbiT)	0.291845	Metabolism	Transferases	ABEV	high_disorder
DS.GH.1.1.15	GH	1	1	15	4.45455	13.6364	5.673	85.5197	170.332	51.9597	19.0909	0.518188	d.58.30.1	6-hydroxymethyl-7,8-dihydropterin pyrophosphokinase, HPPK	0.291845	Metabolism	Coenzyme metabolism	ABEV	high_disorder
DS.HE.3.24.6	HE	3	24	6	12.75	8.5	8.7195	129.7	167.921	95.6983	24.25	0.385808	d.96.1.3	DHN aldolase/epimerase	0.291845	Metabolism	Nucleotide transport and metabolism	ABEV	high_disorder
DS.HE.3.24.2	HE	3	24	2	13.2222	6	7.19378	114.664	162.955	71.9603	22.2222	0.527308	d.96.1.3	DHN aldolase/epimerase	0.291845	Metabolism	Nucleotide transport and metabolism	ABEV	high_disorder
DS.HE.5.25.3	HE	5	25	3	13.5	3.75	11.497	159.601	37.0112	123.992	22.25	0.61715	c.145.1.1	NadA-like	0.291845	Metabolism	Nucleotide transport and metabolism	ABE	high_disorder
DS.HE.4.8.5	HE	4	8	5	12.5	4.64286	9.10193	163.473	83.6536	113.844	21.1429	0.508345	c.66.1.22	Precorrin-6Y methyltransferase (CbiT)	0.291845	Metabolism	Transferases	ABEV	high_disorder
DS.HE.4.10.1	HE	4	10	1	5.25	4.58333	8.82725	100.635	17.8054	37.8365	13.8333	0.607834	c.145.1.1	NadA-like	0.291845	Metabolism	Nucleotide transport and metabolism	ABE	high_disorder
DS.HE.4.5.23	HE	4	5	23	10	4.33333	9.49433	174.545	282.759	105.425	18.3333	0.862745	c.145.1.1	NadA-like	0.291845	Metabolism	Nucleotide transport and metabolism	ABE	high_disorder
DS.EH.2.1.46	EH	2	1	46	5.5	12.25	7.08875	148.86	15.6881	61.2655	19.75	0.443182	c.145.1.1	NadA-like	0.291845	Metabolism	Nucleotide transport and metabolism	ABE	high_disorder
DS.EH.4.3.13	EH	4	3	13	6	9.66667	9.61933	150.057	221.647	85.8293	19.6667	0.344643	c.145.1.1	NadA-like	0.291845	Metabolism	Nucleotide transport and metabolism	ABE	high_disorder
DS.EH.1.1.57	EH	1	1	57	4.16667	10.1667	6.63117	148.069	81.4013	57.0195	15.3333	0.733333	c.145.1.1	NadA-like	0.291845	Metabolism	Nucleotide transport and metabolism	ABE	high_disorder
DS.HE.3.13.1	HE	3	13	1	8.28571	4.5	7.6775	129.095	100.056	51.6546	15.7857	0.597691	c.145.1.1	NadA-like	0.291845	Metabolism	Nucleotide transport and metabolism	ABE	high_disorder
DS.EH.1.5.15	EH	1	5	15	6.8	11.4	5.6128	38.4312	32.8614	8.299	19.2	0.45119	d.273.1.1	YjbQ-like	0.296137	Other	Function unknown	ABE	high_disorder
DS.EH.1.5.23	EH	1	5	23	2.66667	6.33333	5.74167	40.4273	292.797	8.04633	10	0.875	d.273.1.1	YjbQ-like	0.296137	Other	Function unknown	ABE	high_disorder
DS.EH.7.39.1	EH	7	39	1	3	12.6667	11.471	169.846	146.86	85.23	22.6667	0.322895	c.56.5.3	Leucine aminopeptidase, C-terminal domain	0.296137	Intracellular_processes	Proteases, peptidases and their inhibitors	ABE	high_disorder
DS.BN.2.12.1	BN	2	12	1	6.36364	6.09091	4.86014	155.581	337.373	95.3481	14.4545	0.678303	c.144.1.1	RibA-like	0.296137	Metabolism	Coenzyme metabolism	ABEV	high_disorder
DS.EH.3.11.4	EH	3	11	4	4.66667	6	11.6677	97.8663	164.418	40.8537	13.6667	0.354167	c.56.5.3	Leucine aminopeptidase, C-terminal domain	0.296137	Intracellular_processes	Proteases, peptidases and their inhibitors	ABE	high_disorder
DS.EH.5.129.1	EH	5	129	1	4	9.66667	11.367	148.62	202.041	81.9457	18.6667	0.724638	c.5.1.1	MurCD N-terminal domain	0.296137	Metabolism	Other enzymes	ABE	high_disorder
DS.EH.6.67.1	EH	6	67	1	3.66667	9.66667	11.7193	150.573	346.698	54.2023	19.3333	0.391963	c.1.10.4	Class I DAHP synthetase	0.296137	Metabolism	Carbohydrate transport and metabolism	ABEV	high_disorder
DS.GG.1.2.12	GG	1	2	12	3.25	3	4.67325	60.431	33.4793	78.9845	7.25	1	c.1.10.4	Class I DAHP synthetase	0.296137	Metabolism	Carbohydrate transport and metabolism	ABEV	high_disorder
DS.GG.4.4.1	GG	4	4	1	3	3	6.79767	164.934	105.643	126.516	10	1	c.1.10.4	Class I DAHP synthetase	0.296137	Metabolism	Carbohydrate transport and metabolism	ABEV	high_disorder
DS.HE.3.74.2	HE	3	74	2	18	5	7.58033	156.314	140.808	86.05	26	0.154321	c.1.10.4	Class I DAHP synthetase	0.296137	Metabolism	Carbohydrate transport and metabolism	ABEV	moderate_disorder
DS.HE.4.163.1	HE	4	163	1	8.75	5.5	11.0968	86.0673	99.957	49.8395	18.25	0.356926	c.1.10.4	Class I DAHP synthetase	0.296137	Metabolism	Carbohydrate transport and metabolism	ABEV	high_disorder
DS.HE.5.139.1	HE	5	139	1	11	4.33333	8.97467	157.009	112.556	83.5667	20.3333	0.593973	c.1.10.4	Class I DAHP synthetase	0.296137	Metabolism	Carbohydrate transport and metabolism	ABEV	high_disorder
DS.HE.4.171.1	HE	4	171	1	11.25	8.75	13.193	136.81	338.48	112.398	24	0.387229	d.273.1.1	YjbQ-like	0.296137	Other	Function unknown	ABE	high_disorder
DS.EH.3.39.2	EH	3	39	2	5.25	12.75	11.2267	151.934	14.938	54.994	21	0.35804	d.273.1.1	YjbQ-like	0.296137	Other	Function unknown	ABE	high_disorder
DS.EH.8.24.1	EH	8	24	1	4.66667	8	11.1017	143.143	199.617	100.99	20.6667	0.586364	c.5.1.1	MurCD N-terminal domain	0.296137	Metabolism	Other enzymes	ABE	high_disorder
DS.EG.1.6.2	EG	1	6	2	5	3.44444	5.50433	36.9523	214.002	33.5399	9.44444	1	c.50.1.1	Leucine aminopeptidase (Aminopeptidase A), N-terminal domain	0.296137	Intracellular_processes	Proteases, peptidases and their inhibitors	ABE	high_disorder
DS.HE.4.10.2	HE	4	10	2	6.4	5.1	8.77	127.017	54.7466	41.1691	15.5	0.307369	c.23.12.2	L-alanine dehydrogenase-like	0.296137	Metabolism	Oxidation/Reduction	ABE	high_disorder
DS.EG.2.1.26	EG	2	1	26	4.16667	3	8.61733	128.69	53.1975	22.5805	9.16667	0.666667	c.23.12.2	L-alanine dehydrogenase-like	0.296137	Metabolism	Oxidation/Reduction	ABE	high_disorder
DS.BN.2.10.25	BN	2	10	25	9	6.33333	4.887	173.246	172.745	95.4333	17.3333	0.430556	c.50.1.1	Leucine aminopeptidase (Aminopeptidase A), N-terminal domain	0.296137	Intracellular_processes	Proteases, peptidases and their inhibitors	ABE	high_disorder
DS.GE.5.17.1	GE	5	17	1	3	5.75	11.261	131.793	346.312	104.592	13.75	0.738248	c.23.12.2	L-alanine dehydrogenase-like	0.296137	Metabolism	Oxidation/Reduction	ABE	high_disorder
DS.HG.0.1.85	HG	0	1	85	6.25	3	3.0785	13.2275	311.374	82.8581	9.25	1	a.60.8.1	HRDC domain from helicases	0.300429	Information	DNA replication, recombination, repair	ABE	high_disorder
DS.BK.8.12.1	BK	8	12	1	10.8	11.8	15.5614	151.179	351.897	65.637	30.6	0.238637	d.38.1.6	FabZ-like	0.300429	Metabolism	Lipid transport and metabolism	BE	moderate_disorder
DS.GH.1.2.9	GH	1	2	9	3	13.2	5.2027	92.1303	83.2078	68.0976	17.2	0.495723	a.60.8.1	HRDC domain from helicases	0.300429	Information	DNA replication, recombination, repair	ABE	high_disorder
DS.HG.1.2.32	HG	1	2	32	9.75	3	4.90075	97.0215	33.7302	57.7017	13.75	0.861111	a.2.11.1	Fe,Mn superoxide dismutase (SOD), N-terminal domain	0.300429	Metabolism	Oxidation/Reduction	ABE	high_disorder
DS.HH.3.37.1	HH	3	37	1	4	8	8.56225	72.5498	343.54	78.4327	15	0.74902	d.44.1.1	Fe,Mn superoxide dismutase (SOD), C-terminal domain	0.300429	Metabolism	Oxidation/Reduction	ABE	high_disorder
DS.HH.3.2.16	HH	3	2	16	11.8	12.6	10.2946	81.6266	120.929	23.6096	27.4	0.305332	d.44.1.1	Fe,Mn superoxide dismutase (SOD), C-terminal domain	0.300429	Metabolism	Oxidation/Reduction	ABE	high_disorder
DS.GH.1.2.20	GH	1	2	20	3	4	5.7392	74.0516	27.748	94.9286	8	1	d.44.1.1	Fe,Mn superoxide dismutase (SOD), C-terminal domain	0.300429	Metabolism	Oxidation/Reduction	ABE	high_disorder
DS.HH.1.1.57	HH	1	1	57	11.4167	11.5833	3.14733	10.0195	21.8874	65.5803	24	0.363983	a.2.11.1	Fe,Mn superoxide dismutase (SOD), N-terminal domain	0.300429	Metabolism	Oxidation/Reduction	ABE	high_disorder
DS.GH.2.1.41	GH	2	1	41	4.5	10.25	9.182	100.019	80.3932	60.064	16.75	0.422371	d.44.1.1	Fe,Mn superoxide dismutase (SOD), C-terminal domain	0.300429	Metabolism	Oxidation/Reduction	ABE	high_disorder
DS.HE.2.4.19	HE	2	4	19	7.75	3.25	4.92075	36.6583	252.511	24.9632	13	0.642857	c.47.1.11	Thioredoxin-like 2Fe-2S ferredoxin	0.300429	Metabolism	Oxidation/Reduction	ABE	high_disorder
DS.GE.5.8.2	GE	5	8	2	3	5	11.462	164.178	6.089	96.5327	13	1	b.43.4.3	Riboflavin synthase	0.300429	Metabolism	Coenzyme metabolism	ABEV	high_disorder
DS.EH.2.16.4	EH	2	16	4	4.66667	10	7.00767	52.4543	62.4733	20.628	16.6667	0.85	b.43.4.3	Riboflavin synthase	0.300429	Metabolism	Coenzyme metabolism	ABEV	high_disorder
DS.HH.3.15.6	HH	3	15	6	6.75	9.75	4.4145	28.1265	125.848	14.672	19.5	0.52799	a.2.11.1	Fe,Mn superoxide dismutase (SOD), N-terminal domain	0.300429	Metabolism	Oxidation/Reduction	ABE	high_disorder
DS.EH.1.2.46	EH	1	2	46	5	6	5.94167	70.8613	114.184	11.065	12	1	b.43.4.3	Riboflavin synthase	0.300429	Metabolism	Coenzyme metabolism	ABEV	high_disorder
DS.BN.3.59.1	BN	3	59	1	5.83333	5.33333	4.43033	153.247	171.884	94.6698	14.1667	0.787698	b.43.4.3	Riboflavin synthase	0.300429	Metabolism	Coenzyme metabolism	ABEV	high_disorder
DS.EG.2.1.25	EG	2	1	25	5.5	4.33333	7.715	126.75	57.254	38.2347	11.8333	0.421474	b.43.4.3	Riboflavin synthase	0.300429	Metabolism	Coenzyme metabolism	ABEV	high_disorder
DS.GH.2.1.14	GH	2	1	14	3.21053	11.6316	8.36421	98.053	21.2672	57.4266	16.8421	0.814618	a.2.11.1	Fe,Mn superoxide dismutase (SOD), N-terminal domain	0.300429	Metabolism	Oxidation/Reduction	ABE	high_disorder
DS.HH.3.6.3	HH	3	6	3	12.6	7.2	8.5535	142.676	122.498	30.4477	22.8	0.458884	c.47.1.11	Thioredoxin-like 2Fe-2S ferredoxin	0.300429	Metabolism	Oxidation/Reduction	ABE	high_disorder
DS.HE.4.88.2	HE	4	88	2	7.66667	6	10.4853	128.137	157.925	115.228	17.6667	0.468254	d.115.1.2	3,4-dihydroxy-2-butanone 4-phosphate synthase, DHBP synthase, RibB	0.304721	Metabolism	Coenzyme metabolism	ABEV	high_disorder
DS.HE.7.1.3	HE	7	1	3	14	4.8	12.7866	82.6158	345.015	92.673	25.8	0.519443	c.47.1.13	DsbA-like	0.304721	Metabolism	Oxidation/Reduction	ABE	high_disorder
DS.HH.3.13.4	HH	3	13	4	11	11.2857	10.8423	127.535	11.584	110.005	25.2857	0.380396	c.47.1.13	DsbA-like	0.304721	Metabolism	Oxidation/Reduction	ABE	high_disorder
DS.EH.4.42.2	EH	4	42	2	6.25	10	7.25525	152.716	59.2767	98.6727	20.25	0.45926	c.78.2.1	Aspartate/glutamate racemase	0.304721	Metabolism	Amino acid transport and metabolism	ABE	high_disorder
DS.HE.4.33.3	HE	4	33	3	13	4.5	10.4017	172.509	164.562	105.704	21.5	0.321992	c.78.2.1	Aspartate/glutamate racemase	0.304721	Metabolism	Amino acid transport and metabolism	ABE	high_disorder
DS.HE.5.7.2	HE	5	7	2	12.125	3.125	10.2668	149.229	55.4944	112.079	20.25	0.229296	c.78.2.1	Aspartate/glutamate racemase	0.304721	Metabolism	Amino acid transport and metabolism	ABE	moderate_disorder
DS.HH.8.17.1	HH	8	17	1	13	10	14.377	130.854	304.949	109.766	31	0.247312	c.47.1.13	DsbA-like	0.304721	Metabolism	Oxidation/Reduction	ABE	moderate_disorder
DS.HE.6.18.1	HE	6	18	1	11.8333	4.83333	12.7188	64.8522	343.165	101.229	22.6667	0.394182	c.47.1.13	DsbA-like	0.304721	Metabolism	Oxidation/Reduction	ABE	high_disorder
DS.EG.1.4.6	EG	1	4	6	6.375	3	5.68325	35.3701	237.091	33.4285	10.375	0.875	c.78.2.1	Aspartate/glutamate racemase	0.304721	Metabolism	Amino acid transport and metabolism	ABE	high_disorder
DS.HG.1.2.24	HG	1	2	24	15	5	5.6644	144.732	113.789	82.6832	21	0.52029	d.227.1.1	Ohr/OsmC resistance proteins	0.309013	Regulation	Other regulatory function	ABE	high_disorder
DS.BK.1.7.6	BK	1	7	6	6.33333	5	6.773	17.4403	130.255	11.952	12.3333	0.444444	d.227.1.1	Ohr/OsmC resistance proteins	0.309013	Regulation	Other regulatory function	ABE	high_disorder
DS.BK.3.83.1	BK	3	83	1	4.16667	5.83333	7.57067	140.86	98.4055	79.7252	13	0.680342	b.6.1.2	Periplasmic domain of cytochrome c oxidase subunit II	0.309013	Intracellular_processes	Inorganic ion transport and metabolism	ABE	high_disorder
DS.HE.3.67.2	HE	3	67	2	9.5	6.66667	9.11317	143.096	120.58	76.4765	19.1667	0.304027	d.227.1.1	Ohr/OsmC resistance proteins	0.309013	Regulation	Other regulatory function	ABE	high_disorder
DS.GE.2.56.1	GE	2	56	1	4.25	2.5	9.07025	25.3652	96.2237	38.8612	8.75	1	d.227.1.1	Ohr/OsmC resistance proteins	0.309013	Regulation	Other regulatory function	ABE	high_disorder
DS.EH.6.96.1	EH	6	96	1	6.66667	10.6667	14.9143	136.23	322.587	69.1507	23.3333	0.222222	d.227.1.1	Ohr/OsmC resistance proteins	0.309013	Regulation	Other regulatory function	ABE	moderate_disorder
DS.BK.5.117.1	BK	5	117	1	5.33333	5.33333	7.41167	155.571	172.837	109.299	15.6667	0.8125	b.6.1.2	Periplasmic domain of cytochrome c oxidase subunit II	0.309013	Intracellular_processes	Inorganic ion transport and metabolism	ABE	high_disorder
DS.GE.3.13.4	GE	3	13	4	3.66667	5.33333	10.9927	49.1533	101.356	66.5137	12	1	b.6.1.2	Periplasmic domain of cytochrome c oxidase subunit II	0.309013	Intracellular_processes	Inorganic ion transport and metabolism	ABE	high_disorder
DS.HG.0.1.183	HG	0	1	183	6.33333	3	2.93767	29.0067	234.759	80.7983	9.33333	0.666667	b.6.1.2	Periplasmic domain of cytochrome c oxidase subunit II	0.309013	Intracellular_processes	Inorganic ion transport and metabolism	ABE	high_disorder
DS.EG.3.12.1	EG	3	12	1	3.4	3	13.0722	79.013	239.771	23.3866	9.4	1	d.227.1.1	Ohr/OsmC resistance proteins	0.309013	Regulation	Other regulatory function	ABE	high_disorder
DS.BN.2.2.19	BN	2	2	19	5.25806	5.93548	4.76977	160.772	351.462	99.6574	13.1935	0.673771	d.58.18.10	Aspartokinase allosteric domain-like	0.309013	Metabolism	Amino acid transport and metabolism	ABE	high_disorder
DS.HE.6.4.5	HE	6	4	5	19	5.33333	14.4247	163.027	305.848	122.685	30.3333	0.175799	d.227.1.1	Ohr/OsmC resistance proteins	0.309013	Regulation	Other regulatory function	ABE	moderate_disorder
DS.HH.4.25.1	HH	4	25	1	11.6667	8.83333	9.682	159.881	20.71	95.1673	24.5	0.33326	a.152.1.3	Atu0492-like	0.309013	Extracellular_processes	Toxins and defense enzymes	ABEV	high_disorder
DS.BK.1.18.2	BK	1	18	2	6	5.33333	4.86567	125.576	79.3153	83.1263	12.3333	0.785714	b.6.1.2	Periplasmic domain of cytochrome c oxidase subunit II	0.309013	Intracellular_processes	Inorganic ion transport and metabolism	ABE	high_disorder
DS.HE.3.114.1	HE	3	114	1	15	5.2	11.0282	163.082	70.447	126.58	23.2	0.54868	c.16.1.1	Lumazine synthase	0.309013	Metabolism	Coenzyme metabolism	ABEV	high_disorder
DS.GE.3.13.3	GE	3	13	3	3	7	11.8057	96.5297	84.1843	80.0433	13	0.822222	c.71.1.2	RibD C-terminal domain-like	0.309013	Metabolism	Coenzyme metabolism	ABEV	high_disorder
DS.HH.4.1.21	HH	4	1	21	11	15.25	10.7468	129.39	345.51	87.0973	30.25	0.539337	a.152.1.3	Atu0492-like	0.309013	Extracellular_processes	Toxins and defense enzymes	ABEV	high_disorder
DS.HH.1.1.78	HH	1	1	78	13.375	4	5.42225	117.458	75.3335	41.2266	18.375	0.504167	a.152.1.3	Atu0492-like	0.309013	Extracellular_processes	Toxins and defense enzymes	ABEV	high_disorder
DS.HH.2.2.1	HH	2	2	1	10.6935	10.0645	6.65282	65.9949	247.53	26.6134	22.7581	0.470533	d.58.4.11	PA3566-like	0.309013	Metabolism	Secondary metabolites biosynthesis, transport and catabolism	ABE	high_disorder
DS.GG.2.10.2	GG	2	10	2	3	3.2	8.7156	114.567	31.317	67.9824	8.2	1	a.152.1.3	Atu0492-like	0.309013	Extracellular_processes	Toxins and defense enzymes	ABEV	high_disorder
DS.HH.2.2.49	HH	2	2	49	7.33333	12.6667	5.85	38.3423	262.836	40.1193	22	0.603261	d.58.4.11	PA3566-like	0.309013	Metabolism	Secondary metabolites biosynthesis, transport and catabolism	ABE	high_disorder
DS.BN.6.58.1	BN	6	58	1	9	9.2	5.8372	163.544	332.874	65.4086	24.2	0.441259	d.58.4.11	PA3566-like	0.309013	Metabolism	Secondary metabolites biosynthesis, transport and catabolism	ABE	high_disorder
DS.EH.2.1.5	EH	2	1	5	5.5	9.92857	7.65455	128.852	24.2672	53.8834	17.4286	0.475231	d.58.4.11	PA3566-like	0.309013	Metabolism	Secondary metabolites biosynthesis, transport and catabolism	ABE	high_disorder
DS.GE.3.34.1	GE	3	34	1	3	4.75	7.13525	101.495	190.761	98.7193	10.75	0.75	d.58.4.5	PG130-like	0.309013	Metabolism	Secondary metabolites biosynthesis, transport and catabolism	ABE	high_disorder
DS.GE.3.70.1	GE	3	70	1	3.33333	4	10.6087	65.3887	48.3817	68.3193	10.3333	1	c.124.1.1	NagB-like	0.313305	Metabolism	Transferases	BE	high_disorder
DS.HE.4.10.16	HE	4	10	16	4	5.5	8.88825	100.401	14.6468	47.7752	13.5	0.535714	c.124.1.1	NagB-like	0.313305	Metabolism	Transferases	BE	high_disorder
DS.HH.3.2.17	HH	3	2	17	7.8	13.2	9.1914	138.233	61.4436	28.787	24	0.445031	c.26.2.2	PAPS reductase-like	0.313305	Metabolism	Nucleotide transport and metabolism	ABEV	high_disorder
DS.HE.4.5.6	HE	4	5	6	12.7	5.7	10.4405	170.957	112.228	107.373	22.4	0.299646	c.77.1.4	PlsX-like	0.313305	Metabolism	Oxidation/Reduction	ABE	moderate_disorder
DS.EH.9.3.1	EH	9	3	1	3	8	7.0388	116.085	82.4078	113.32	20	1	c.124.1.1	NagB-like	0.313305	Metabolism	Transferases	BE	high_disorder
DS.GG.2.17.1	GG	2	17	1	3	3	8.27633	74.507	59.84	130.922	8	1	c.1.26.1	Homocysteine S-methyltransferase	0.313305	Metabolism	Transferases	ABE	high_disorder
DS.HE.5.146.1	HE	5	146	1	11	4	9.365	165.437	30.2033	96.03	20	0.367107	c.1.26.1	Homocysteine S-methyltransferase	0.313305	Metabolism	Transferases	ABE	high_disorder
DS.HG.0.1.128	HG	0	1	128	4	3	3.435	12.1585	330.101	95.5722	7	1	c.1.26.1	Homocysteine S-methyltransferase	0.313305	Metabolism	Transferases	ABE	high_disorder
DS.HH.4.6.2	HH	4	6	2	12.2	11.5	11.3946	141.403	17.095	54.4527	27.7	0.536008	c.26.2.2	PAPS reductase-like	0.313305	Metabolism	Nucleotide transport and metabolism	ABEV	high_disorder
DS.EG.1.1.37	EG	1	1	37	5	4.66667	6.80167	86.3113	305.923	3.94267	10.6667	0.666667	c.77.1.4	PlsX-like	0.313305	Metabolism	Oxidation/Reduction	ABE	high_disorder
DS.HH.2.1.122	HH	2	1	122	5.66667	6	5.735	8.70133	13.2887	15.982	13.6667	0.688889	c.1.26.1	Homocysteine S-methyltransferase	0.313305	Metabolism	Transferases	ABE	high_disorder
DS.EH.2.2.6	EH	2	2	6	4.93333	8.86667	10.322	116.508	22.5445	27.7815	15.8	0.547491	c.77.1.4	PlsX-like	0.313305	Metabolism	Oxidation/Reduction	ABE	high_disorder
DS.BN.6.21.1	BN	6	21	1	3.75	5.625	4.56637	128.477	347.509	96.641	15.375	0.770079	d.74.1.1	PCD-like	0.313305	Metabolism	Coenzyme metabolism	ABE	high_disorder
DS.EG.2.31.3	EG	2	31	3	5.66667	3	10.2367	145.067	36.5333	31.9003	10.6667	1	c.124.1.1	NagB-like	0.313305	Metabolism	Transferases	BE	high_disorder
DS.HE.4.264.1	HE	4	264	1	12.6667	5	11.3633	163.763	83.119	121.062	21.6667	0.441799	c.26.2.2	PAPS reductase-like	0.313305	Metabolism	Nucleotide transport and metabolism	ABEV	high_disorder
DS.EH.1.3.14	EH	1	3	14	4.5	7.33333	6.5275	94.8808	263.907	6.7455	12.8333	0.884615	c.124.1.1	NagB-like	0.313305	Metabolism	Transferases	BE	high_disorder
DS.EH.10.8.1	EH	10	8	1	3	8	7.80033	133.839	72.081	123.451	21	0.761905	c.124.1.1	NagB-like	0.313305	Metabolism	Transferases	BE	high_disorder
DS.EH.8.23.1	EH	8	23	1	2.33333	14.3333	17.2543	145.662	198.645	34.2937	24.6667	0.499444	c.124.1.1	NagB-like	0.313305	Metabolism	Transferases	BE	high_disorder
DS.HE.2.2.23	HE	2	2	23	7.66667	5.66667	7.38933	108.333	103.601	50.843	15.3333	0.466667	c.108.1.4	Phosphoserine phosphatase	0.313305	Metabolism	Other enzymes	ABEV	high_disorder
DS.HE.3.15.1	HE	3	15	1	10.8333	5.88889	7.39078	149.57	163.745	97.1467	19.7222	0.420272	c.25.1.1	Reductases	0.317597	Metabolism	Oxidation/Reduction	ABE	high_disorder
DS.HH.4.44.1	HH	4	44	1	6.25	8.25	10.4147	145.349	64.825	108.016	18.5	0.697368	a.99.1.1	Cryptochrome/photolyase FAD-binding domain	0.317597	General	General or several functions	ABEV	high_disorder
DS.HG.1.6.3	HG	1	6	3	19	3	5.60025	61.6482	128.218	108.331	23	0.5	f.21.1.2	Cytochrome b of cytochrome bc1 complex (Ubiquinol-cytochrome c reductase)	0.317597	Metabolism	Energy production and conversion	ABE	high_disorder
DS.HH.5.1.16	HH	5	1	16	8	19.75	10.515	144.922	107.958	74.1825	32.75	0.284704	a.99.1.1	Cryptochrome/photolyase FAD-binding domain	0.317597	General	General or several functions	ABEV	moderate_disorder
DS.HH.5.27.1	HH	5	27	1	12.2857	9.71429	9.35186	149.777	26.9497	92.3951	27	0.286708	a.99.1.1	Cryptochrome/photolyase FAD-binding domain	0.317597	General	General or several functions	ABEV	moderate_disorder
DS.GE.3.1.2	GE	3	1	2	3	4.625	8.75925	51.2846	28.0064	28.8223	10.625	1	d.15.4.1	2Fe-2S ferredoxin-related	0.317597	Metabolism	Oxidation/Reduction	ABEV	high_disorder
DS.EH.0.1.87	EH	0	1	87	3	7	2.727	63.35	118.874	12.8993	10	0.74359	d.15.4.1	2Fe-2S ferredoxin-related	0.317597	Metabolism	Oxidation/Reduction	ABEV	high_disorder
DS.HH.4.98.1	HH	4	98	1	8	6	9.15633	115.445	59.4943	82.5187	18	0.833333	a.99.1.1	Cryptochrome/photolyase FAD-binding domain	0.317597	General	General or several functions	ABEV	high_disorder
DS.EG.1.2.58	EG	1	2	58	5.66667	3	7.07533	123.109	141.795	29.097	9.66667	1	d.15.4.1	2Fe-2S ferredoxin-related	0.317597	Metabolism	Oxidation/Reduction	ABEV	high_disorder
DS.HH.5.95.1	HH	5	95	1	9	13	11.6107	72.425	260.452	75.1533	27	0.469136	a.99.1.1	Cryptochrome/photolyase FAD-binding domain	0.317597	General	General or several functions	ABEV	high_disorder
DS.HE.4.91.2	HE	4	91	2	12.3333	5.66667	8.879	165.661	121.047	82.163	22	0.378568	c.28.1.1	Cryptochrome/photolyase, N-terminal domain	0.317597	Information	DNA replication, recombination, repair	ABEV	high_disorder
DS.HH.1.1.95	HH	1	1	95	11.8	12.6	3.3736	18.9806	38.388	55.0266	25.4	0.277404	f.24.1.1	Cytochrome c oxidase subunit I-like	0.317597	Metabolism	Energy production and conversion	ABEV	moderate_disorder
DS.HH.2.1.109	HH	2	1	109	10.6667	15	3.257	20.0053	353.387	14.1883	27.6667	0.100741	f.24.1.1	Cytochrome c oxidase subunit I-like	0.317597	Metabolism	Energy production and conversion	ABEV	moderate_disorder
DS.EH.3.32.3	EH	3	32	3	4.66667	9	12.1753	101.906	156.187	13.4413	16.6667	0.58658	d.303.1.1	BB1717-like	0.317597	N_A	not annotated	ABEV	high_disorder
DS.HH.5.72.1	HH	5	72	1	12	15	12.805	138.634	327.03	114.948	32	0.228982	a.99.1.1	Cryptochrome/photolyase FAD-binding domain	0.317597	General	General or several functions	ABEV	moderate_disorder
DS.BN.3.38.2	BN	3	38	2	8	8	5.73767	173.1	239.993	66.6017	19	0.40404	b.82.1.12	Pirin-like	0.317597	Metabolism	Nitrogen metabolism	ABE	high_disorder
DS.BK.3.2.5	BK	3	2	5	5.75	6.875	7.44688	145.28	70.0131	79.9802	15.625	0.385252	b.82.1.12	Pirin-like	0.317597	Metabolism	Nitrogen metabolism	ABE	high_disorder
DS.HG.1.1.26	HG	1	1	26	12.625	3	4.94588	99.8824	39.7388	75.033	16.625	0.831296	d.136.1.2	Phospholipase D	0.317597	Metabolism	Other enzymes	ABEV	high_disorder
DS.GH.2.3.20	GH	2	3	20	5	16.5	8.731	109.258	49.5117	39.9002	23.5	0.595238	e.53.1.1	QueA-like	0.317597	Metabolism	Other enzymes	ABE	high_disorder
DS.HE.4.2.13	HE	4	2	13	12	5.33333	10.5555	161.724	101.653	107.51	21.3333	0.464251	d.136.1.2	Phospholipase D	0.317597	Metabolism	Other enzymes	ABEV	high_disorder
DS.GE.0.3.2	GE	0	3	2	5.125	5.25	2.81275	52.899	155.448	48.3377	10.375	0.9	d.136.1.2	Phospholipase D	0.317597	Metabolism	Other enzymes	ABEV	high_disorder
DS.EH.1.4.17	EH	1	4	17	4.2	8.6	5.7428	143.151	64.755	50.9648	13.8	0.542857	e.53.1.1	QueA-like	0.317597	Metabolism	Other enzymes	ABE	high_disorder
DS.BN.3.5.2	BN	3	5	2	5.76471	6.17647	4.88535	168.302	345.885	97.9478	14.9412	0.465179	d.136.1.2	Phospholipase D	0.317597	Metabolism	Other enzymes	ABEV	high_disorder
DS.GG.1.3.8	GG	1	3	8	3	3	5.564	123.569	38.4857	84.6763	7	1	f.24.1.1	Cytochrome c oxidase subunit I-like	0.317597	Metabolism	Energy production and conversion	ABEV	high_disorder
DS.HE.5.117.1	HE	5	117	1	10.25	6	11.5273	141.565	20.7203	94.4802	21.25	0.382486	e.53.1.1	QueA-like	0.317597	Metabolism	Other enzymes	ABE	high_disorder
DS.GH.3.21.1	GH	3	21	1	3.2	14.2	10.9384	144.365	214.785	85.9602	20.4	0.351494	a.96.1.2	Mismatch glycosylase	0.317597	Information	DNA replication, recombination, repair	ABEV	high_disorder
DS.EG.0.2.40	EG	0	2	40	11.6667	4	3.25667	66.897	351.374	17.088	15.6667	0.809524	b.61.6.1	YceI-like	0.317597	Other	Function unknown	ABE	high_disorder
DS.BK.2.1.16	BK	2	1	16	5.22222	3.22222	9.59711	8.41389	148.866	9.79256	10.4444	0.69281	e.53.1.1	QueA-like	0.317597	Metabolism	Other enzymes	ABE	high_disorder
DS.BN.2.2.56	BN	2	2	56	8.28571	6.57143	4.73086	173.914	344.965	95.3414	16.8571	0.53209	d.129.3.6	oligoketide cyclase/dehydrase-like	0.317597	General	General or several functions	ABEV	high_disorder
DS.EH.4.99.1	EH	4	99	1	5	7.75	11.4527	150.16	56.3453	64.519	16.75	0.35773	d.129.3.6	oligoketide cyclase/dehydrase-like	0.317597	General	General or several functions	ABEV	high_disorder
DS.GE.3.23.1	GE	3	23	1	3	4.66667	8.5565	128.978	191.283	111.649	10.6667	0.833333	d.129.3.6	oligoketide cyclase/dehydrase-like	0.317597	General	General or several functions	ABEV	high_disorder
DS.EH.1.1.55	EH	1	1	55	3.85714	11.2857	6.52914	78.7136	185.131	3.50929	16.1429	0.764846	e.53.1.1	QueA-like	0.317597	Metabolism	Other enzymes	ABE	high_disorder
DS.HH.6.57.1	HH	6	57	1	8	13	11.485	78.4153	265.747	58.2197	27	0.54321	a.99.1.1	Cryptochrome/photolyase FAD-binding domain	0.317597	General	General or several functions	ABEV	high_disorder
DS.BK.2.85.1	BK	2	85	1	3	7.66667	9.36833	78.825	189.514	16.3333	12.6667	0.822222	e.53.1.1	QueA-like	0.317597	Metabolism	Other enzymes	ABE	high_disorder
DS.BN.5.1.8	BN	5	1	8	7.83333	8	5.28467	157.845	323.249	102.523	20.8333	0.701829	e.53.1.1	QueA-like	0.317597	Metabolism	Other enzymes	ABE	high_disorder
DS.EG.1.2.51	EG	1	2	51	5.5	5.5	6.26675	76.8925	97.7512	26.2112	12	0.596154	c.28.1.1	Cryptochrome/photolyase, N-terminal domain	0.317597	Information	DNA replication, recombination, repair	ABEV	high_disorder
DS.BN.2.8.17	BN	2	8	17	7.33333	7.16667	4.66967	143.899	341.064	88.4432	16.5	0.592262	b.61.6.1	YceI-like	0.317597	Other	Function unknown	ABE	high_disorder
DS.HH.6.34.1	HH	6	34	1	13.5	13.5	13.4325	126.111	343.186	131.546	33	0.294676	a.4.5.42	FUR-like	0.321888	Regulation	DNA-binding (transcription factors)	ABE	moderate_disorder
DS.EG.1.2.27	EG	1	2	27	4.5	4.2	6.5351	79.7373	112.236	15.7155	9.7	0.706667	c.110.1.1	DTD-like	0.321888	Information	Translation, ribosomes, ribosome biogenesis; tRNA metabolism	ABE	high_disorder
DS.BN.4.2.5	BN	4	2	5	6.30435	5.69565	4.67974	159.952	9.10713	95.5194	16	0.651074	c.66.1.17	Spermidine synthase	0.321888	Metabolism	Transferases	ABEV	high_disorder
DS.GE.3.21.1	GE	3	21	1	4	3.25	6.64725	81.4433	178.092	72.37	10.25	1	c.66.1.17	Spermidine synthase	0.321888	Metabolism	Transferases	ABEV	high_disorder
DS.BN.2.33.3	BN	2	33	3	4.5	5	4.74825	125.013	331.187	93.0855	11.5	0.833333	c.110.1.1	DTD-like	0.321888	Information	Translation, ribosomes, ribosome biogenesis; tRNA metabolism	ABE	high_disorder
DS.HE.5.135.1	HE	5	135	1	6	4	8.66367	109.787	77.1657	71.2047	15	0.42029	b.122.1.1	PUA domain	0.321888	Regulation	RNA processing and modification	ABE	high_disorder
DS.BK.8.19.1	BK	8	19	1	4	5.66667	12.7233	139.717	333.905	57.8503	17.6667	0.525054	b.122.1.1	PUA domain	0.321888	Regulation	RNA processing and modification	ABE	high_disorder
DS.EH.2.8.10	EH	2	8	10	5	8.66667	8.18133	137.69	67.767	51.232	15.6667	0.647059	e.51.1.1	Urocanase	0.321888	Metabolism	Other enzymes	ABE	high_disorder
DS.HH.3.12.5	HH	3	12	5	10	9.66667	12.4437	102.526	15.92	136.369	22.6667	0.423077	d.2.1.6	Bacterial muramidase, catalytic domain	0.321888	Metabolism	Other enzymes	BEV	high_disorder
DS.HH.4.15.4	HH	4	15	4	4.66667	17.6667	10.3793	140.089	167.81	39.101	26.3333	0.181122	d.2.1.6	Bacterial muramidase, catalytic domain	0.321888	Metabolism	Other enzymes	BEV	moderate_disorder
DS.HE.5.120.1	HE	5	120	1	6.75	3	7.44325	141.812	70.3558	100.01	14.75	0.752193	b.122.1.1	PUA domain	0.321888	Regulation	RNA processing and modification	ABE	high_disorder
DS.BN.2.5.26	BN	2	5	26	7.16667	7	4.78517	164.856	333.408	93.5608	16.1667	0.583333	a.4.5.4	CAP C-terminal domain-like	0.321888	Regulation	DNA-binding (transcription factors)	ABEV	high_disorder
DS.HH.5.80.1	HH	5	80	1	7	5.66667	14.827	66.1353	243.599	15.3057	17.6667	0.41155	c.66.1.17	Spermidine synthase	0.321888	Metabolism	Transferases	ABEV	high_disorder
DS.BN.5.110.1	BN	5	110	1	7	6	4.52875	119.278	355.214	86.91	18	0.549375	b.122.1.1	PUA domain	0.321888	Regulation	RNA processing and modification	ABE	high_disorder
DS.EH.4.102.1	EH	4	102	1	2.25	14.25	13.2238	56.8638	15.1047	41.4663	20.5	0.218025	c.55.1.8	Ppx/GppA phosphatase	0.321888	Metabolism	Other enzymes	ABE	moderate_disorder
DS.HH.2.1.54	HH	2	1	54	12.75	5.25	6.9195	55.3937	322.985	21.888	20	0.461495	a.1.1.1	Truncated hemoglobin	0.321888	Metabolism	Energy production and conversion	ABE	high_disorder
DS.BK.1.13.1	BK	1	13	1	4.2	5.6	5.5834	96.2389	101.083	35.9767	10.8	0.611495	c.110.1.1	DTD-like	0.321888	Information	Translation, ribosomes, ribosome biogenesis; tRNA metabolism	ABE	high_disorder
DS.BN.4.111.1	BN	4	111	1	4.75	5.75	5.42975	143	325.832	105.282	14.5	0.773529	b.84.3.2	Peptidoglycan hydrolase LytM	0.321888	Metabolism	Carbohydrate transport and metabolism	ABEV	high_disorder
DS.HH.6.1.2	HH	6	1	2	12.1667	12.3333	12.321	160.498	301.099	94.674	30.5	0.304215	c.66.1.7	Protein-L-isoaspartyl O-methyltransferase	0.321888	Metabolism	Transferases	ABEV	high_disorder
DS.HG.2.18.1	HG	2	18	1	10	3.25	8.259	54.4363	9.1025	52.2965	15.25	0.820833	c.66.1.7	Protein-L-isoaspartyl O-methyltransferase	0.321888	Metabolism	Transferases	ABEV	high_disorder
DS.HG.2.12.2	HG	2	12	2	8	4.33333	8.18833	64.4077	31.1977	39.7163	14.3333	1	c.66.1.7	Protein-L-isoaspartyl O-methyltransferase	0.321888	Metabolism	Transferases	ABEV	high_disorder
DS.HE.4.95.2	HE	4	95	2	10	5.66667	7.85267	163.152	26.312	112.621	19.6667	0.428947	c.66.1.7	Protein-L-isoaspartyl O-methyltransferase	0.321888	Metabolism	Transferases	ABEV	high_disorder
DS.HE.1.6.3	HE	1	6	3	9.4	7.6	4.5304	38.9586	203.776	23.1378	18	0.350253	c.66.1.7	Protein-L-isoaspartyl O-methyltransferase	0.321888	Metabolism	Transferases	ABEV	high_disorder
DS.GG.2.5.3	GG	2	5	3	3.8	5.6	9.0268	154.719	342.31	79.5832	11.4	1	c.66.1.7	Protein-L-isoaspartyl O-methyltransferase	0.321888	Metabolism	Transferases	ABEV	high_disorder
DS.GG.2.15.1	GG	2	15	1	3	3	8.47067	99.3183	118.811	64.7647	8	1	c.66.1.7	Protein-L-isoaspartyl O-methyltransferase	0.321888	Metabolism	Transferases	ABEV	high_disorder
DS.GE.3.44.1	GE	3	44	1	3	6.5	11.0117	106.705	55.769	108.891	12.5	0.75	c.66.1.7	Protein-L-isoaspartyl O-methyltransferase	0.321888	Metabolism	Transferases	ABEV	high_disorder
DS.EG.2.24.1	EG	2	24	1	5.4	3	8.7178	80.01	8.092	71.8606	10.4	0.8	c.66.1.7	Protein-L-isoaspartyl O-methyltransferase	0.321888	Metabolism	Transferases	ABEV	high_disorder
DS.EG.1.11.3	EG	1	11	3	5	3	7.2778	113.696	126.524	11.5118	9	1	c.66.1.7	Protein-L-isoaspartyl O-methyltransferase	0.321888	Metabolism	Transferases	ABEV	high_disorder
DS.BN.2.9.13	BN	2	9	13	6	8.75	4.4425	173.93	19.9833	86.4227	16.75	0.72619	c.66.1.7	Protein-L-isoaspartyl O-methyltransferase	0.321888	Metabolism	Transferases	ABEV	high_disorder
DS.HH.4.33.2	HH	4	33	2	9.66667	11	7.21933	83.251	63.0797	23.2017	24.6667	0.480834	c.55.1.8	Ppx/GppA phosphatase	0.321888	Metabolism	Other enzymes	ABE	high_disorder
DS.GH.3.11.3	GH	3	11	3	3	8.33333	7.286	37.863	22.7513	48.2157	14.3333	0.365079	c.55.1.8	Ppx/GppA phosphatase	0.321888	Metabolism	Other enzymes	ABE	high_disorder
DS.HG.0.1.153	HG	0	1	153	9.75	3	2.74525	47.5998	277.766	49.909	12.75	0.777778	d.128.1.3	Glutamate-cysteine ligase family 2 (GCS2)	0.321888	Metabolism	Amino acid transport and metabolism	ABE	high_disorder
DS.HG.4.34.1	HG	4	34	1	12.5	3.25	5.646	102.636	124.128	60.7788	19.75	0.65963	a.1.1.1	Truncated hemoglobin	0.321888	Metabolism	Energy production and conversion	ABE	high_disorder
DS.BN.2.28.2	BN	2	28	2	7.25	5.75	4.84	153.001	353.959	97.2433	15	0.344494	c.55.1.8	Ppx/GppA phosphatase	0.321888	Metabolism	Other enzymes	ABE	high_disorder
DS.HH.1.3.28	HH	1	3	28	10	4.6	6.2372	109.138	198.461	39.4244	15.6	0.706824	a.1.1.1	Truncated hemoglobin	0.321888	Metabolism	Energy production and conversion	ABE	high_disorder
DS.HG.4.4.7	HG	4	4	7	11.3333	3	9.70167	79.2863	28.5887	121.992	18.3333	0.701389	d.2.1.6	Bacterial muramidase, catalytic domain	0.321888	Metabolism	Other enzymes	BEV	high_disorder
DS.HH.3.30.1	HH	3	30	1	13.5	10.5	8.2995	82.8882	6.41525	83.2275	27	0.504396	c.1.19.1	Methylmalonyl-CoA mutase, N-terminal (CoA-binding) domain	0.321888	Metabolism	Coenzyme metabolism	ABE	high_disorder
DS.HE.3.4.20	HE	3	4	20	13.3333	4.66667	5.82083	118.04	165.152	93.5402	21	0.538306	a.4.5.4	CAP C-terminal domain-like	0.321888	Regulation	DNA-binding (transcription factors)	ABEV	high_disorder
DS.HG.4.2.2	HG	4	2	2	11.7143	3	11.2663	75.706	12.636	101.685	18.7143	0.741292	d.63.1.2	CYTH domain	0.321888	Information	Transcription	ABEV	high_disorder
DS.HG.5.1.2	HG	5	1	2	6	3	8.91075	144.574	17.9333	95.0332	14	0.816667	c.31.1.2	C-terminal domain of the electron transfer flavoprotein alpha subunit	0.321888	Metabolism	Other enzymes	ABE	high_disorder
DS.HE.7.61.1	HE	7	61	1	4	5.66667	13.3217	116.912	3.03633	35.639	16.6667	0.757353	c.31.1.2	C-terminal domain of the electron transfer flavoprotein alpha subunit	0.321888	Metabolism	Other enzymes	ABE	high_disorder
DS.EH.3.7.11	EH	3	7	11	3.66667	8.66667	10.3763	115.78	13.6753	47.967	15.3333	0.777778	c.31.1.2	C-terminal domain of the electron transfer flavoprotein alpha subunit	0.321888	Metabolism	Other enzymes	ABE	high_disorder
DS.EG.1.2.6	EG	1	2	6	5.83333	3.25	6.86317	101.087	196.37	10.3133	10.0833	0.916667	c.31.1.2	C-terminal domain of the electron transfer flavoprotein alpha subunit	0.321888	Metabolism	Other enzymes	ABE	high_disorder
DS.GE.5.20.1	GE	5	20	1	3	3.33333	10.4943	117.594	14.4843	71.1497	11.3333	0.666667	c.6.2.3	NodB-like polysaccharide deacetylase	0.321888	Metabolism	Other enzymes	ABEV	high_disorder
DS.HE.4.181.1	HE	4	181	1	9.25	7	9.70025	100.246	105.573	95.7188	20.25	0.6875	d.63.1.2	CYTH domain	0.321888	Information	Transcription	ABEV	high_disorder
DS.HE.3.31.1	HE	3	31	1	9	6.14286	7.16095	70.4619	147.245	78.4429	18.1429	0.579333	c.124.1.2	CoA transferase alpha subunit-like	0.321888	Metabolism	Transferases	ABE	high_disorder
DS.BN.4.6.6	BN	4	6	6	7.25	2.5	6.8365	168.107	260.23	140.218	13.75	0.621795	c.124.1.2	CoA transferase alpha subunit-like	0.321888	Metabolism	Transferases	ABE	high_disorder
DS.HE.1.14.2	HE	1	14	2	6.5	4.5	5.56975	85.8787	117.959	56.6927	12	1	d.3.1.16	NlpC/P60	0.321888	Intracellular_processes	Proteases, peptidases and their inhibitors	ABEV	high_disorder
DS.HE.2.40.3	HE	2	40	3	8.33333	7.66667	9.32933	109.165	93.4547	103.891	18	0.516484	d.63.1.2	CYTH domain	0.321888	Information	Transcription	ABEV	high_disorder
DS.EH.3.37.1	EH	3	37	1	6.2	12.2	9.269	112.562	35.8478	65.9938	21.4	0.479276	d.63.1.2	CYTH domain	0.321888	Information	Transcription	ABEV	high_disorder
DS.BN.6.20.3	BN	6	20	3	7	8.33333	6.21867	127.97	320.588	75.9553	21.3333	0.569444	d.63.1.2	CYTH domain	0.321888	Information	Transcription	ABEV	high_disorder
DS.BN.3.33.3	BN	3	33	3	8	6	4.822	177.109	319.811	96.7983	17	0.672807	c.124.1.3	CoA transferase beta subunit-like	0.321888	Metabolism	Transferases	ABE	high_disorder
DS.EH.5.20.1	EH	5	20	1	5.625	12.25	12.4929	151.183	327.264	73.4404	22.875	0.46769	d.322.1.2	PPK middle domain-like	0.321888	N_A	not annotated	ABE	high_disorder
DS.HG.3.2.18	HG	3	2	18	11.6667	3	5.57933	40.342	51.3773	80.605	17.6667	0.619883	c.91.1.1	PEP carboxykinase C-terminal domain	0.321888	Metabolism	Energy production and conversion	ABE	high_disorder
DS.HG.1.2.17	HG	1	2	17	10.2857	3.14286	5.83814	127.361	149.226	54.3154	14.4286	0.713605	c.91.1.1	PEP carboxykinase C-terminal domain	0.321888	Metabolism	Energy production and conversion	ABE	high_disorder
DS.GE.2.5.8	GE	2	5	8	3	5	9.5655	70.2417	96.345	77.2157	10	0.75	c.109.1.1	PEP carboxykinase N-terminal domain	0.321888	Metabolism	Energy production and conversion	ABE	high_disorder
DS.EH.2.2.12	EH	2	2	12	3.8	12.1	9.6083	116.331	109.689	16.7472	17.9	0.738289	c.91.1.1	PEP carboxykinase C-terminal domain	0.321888	Metabolism	Energy production and conversion	ABE	high_disorder
DS.BK.3.145.1	BK	3	145	1	3	3.33333	8.319	122.218	106.896	85.0727	9.33333	1	c.124.1.3	CoA transferase beta subunit-like	0.321888	Metabolism	Transferases	ABE	high_disorder
DS.EH.1.19.2	EH	1	19	2	4.66667	5.66667	6.46467	99.2122	303.447	12.6185	11.3333	0.839286	d.32.1.4	Methylmalonyl-CoA epimerase	0.321888	Metabolism	Oxidation/Reduction	ABE	high_disorder
DS.EG.1.14.1	EG	1	14	1	5	3	7.2095	104.882	193.297	18.6023	9	0.926282	d.32.1.4	Methylmalonyl-CoA epimerase	0.321888	Metabolism	Oxidation/Reduction	ABE	high_disorder
DS.EG.1.1.13	EG	1	1	13	6.45833	3.33333	6.85771	96.0013	14.221	24.3228	10.7917	0.756706	c.6.2.3	NodB-like polysaccharide deacetylase	0.321888	Metabolism	Other enzymes	ABEV	high_disorder
DS.HE.6.109.1	HE	6	109	1	9.33333	5	9.12	156.57	111.39	65.534	20.3333	0.759259	c.6.2.3	NodB-like polysaccharide deacetylase	0.321888	Metabolism	Other enzymes	ABEV	high_disorder
DS.HE.5.22.1	HE	5	22	1	10.7	4.1	13.5107	162.176	127.57	117.78	19.8	0.337596	c.6.2.3	NodB-like polysaccharide deacetylase	0.321888	Metabolism	Other enzymes	ABEV	high_disorder
DS.EH.4.7.5	EH	4	7	5	4	7.66667	10.306	122.864	111.479	35.7517	15.6667	0.666667	c.6.2.3	NodB-like polysaccharide deacetylase	0.321888	Metabolism	Other enzymes	ABEV	high_disorder
DS.GE.3.48.1	GE	3	48	1	3.25	6	12.6022	34.2157	66.2772	57.852	12.25	1	c.1.19.1	Methylmalonyl-CoA mutase, N-terminal (CoA-binding) domain	0.321888	Metabolism	Coenzyme metabolism	ABE	high_disorder
DS.HE.4.46.1	HE	4	46	1	12	4	14.4556	167.12	122.435	130.834	20	0.342714	c.6.2.3	NodB-like polysaccharide deacetylase	0.321888	Metabolism	Other enzymes	ABEV	high_disorder
DS.HE.4.133.1	HE	4	133	1	9.6	6.2	10.898	141.008	10.988	80.3362	19.8	0.34	d.131.1.1	DNA polymerase III, beta subunit	0.321888	Information	DNA replication, recombination, repair	BEV	high_disorder
DS.BN.6.61.1	BN	6	61	1	6.8	5.8	5.3304	161.781	338.376	103.764	18.6	0.690749	d.131.1.1	DNA polymerase III, beta subunit	0.321888	Information	DNA replication, recombination, repair	BEV	high_disorder
DS.GH.2.1.6	GH	2	1	6	3	14.625	9.24103	163.399	337.789	95.3984	19.625	0.661171	c.6.2.3	NodB-like polysaccharide deacetylase	0.321888	Metabolism	Other enzymes	ABEV	high_disorder
DS.HH.1.1.157	HH	1	1	157	4	22.6667	5.12	101.233	98.71	88.0777	27.6667	0.303792	a.127.1.2	HAL/PAL-like	0.321888	Metabolism	Amino acid transport and metabolism	ABE	high_disorder
DS.GH.1.1.50	GH	1	1	50	3.25	8.75	5.93	57.7037	172.5	80.442	13	0.920455	a.127.1.2	HAL/PAL-like	0.321888	Metabolism	Amino acid transport and metabolism	ABE	high_disorder
DS.BN.3.12.1	BN	3	12	1	6.38889	7.83333	5.62719	168.519	335.003	66.5225	17.2222	0.500564	d.131.1.1	DNA polymerase III, beta subunit	0.321888	Information	DNA replication, recombination, repair	BEV	high_disorder
DS.HG.3.1.16	HG	3	1	16	9.33333	3	11.7413	50.887	33.035	123.162	15.3333	0.882353	c.108.1.1	HAD-related	0.32618	Metabolism	Other enzymes	ABEV	high_disorder
DS.HG.3.6.6	HG	3	6	6	12.3333	3	8.95467	83.603	348.426	25.9387	18.3333	0.828283	c.92.2.2	TroA-like	0.32618	General	General or several functions	ABE	high_disorder
DS.HE.5.91.1	HE	5	91	1	14	5.5	14.9718	157.883	249.117	122.402	24.5	0.271679	c.25.1.2	Aromatic dioxygenase reductase-like	0.32618	Metabolism	Oxidation/Reduction	ABE	moderate_disorder
DS.GH.0.1.97	GH	0	1	97	3.8	9.6	2.9328	41.419	53.8048	49.141	13.4	0.763922	c.25.1.2	Aromatic dioxygenase reductase-like	0.32618	Metabolism	Oxidation/Reduction	ABE	high_disorder
DS.GG.2.1.7	GG	2	1	7	3	4.66667	9.12533	113.865	69.5463	70.0987	9.66667	1	c.25.1.2	Aromatic dioxygenase reductase-like	0.32618	Metabolism	Oxidation/Reduction	ABE	high_disorder
DS.EG.2.1.34	EG	2	1	34	5.6	3	8.5506	79.737	328.655	65.8806	10.6	0.8	c.25.1.2	Aromatic dioxygenase reductase-like	0.32618	Metabolism	Oxidation/Reduction	ABE	high_disorder
DS.HH.2.1.48	HH	2	1	48	10.4	6.6	4.8888	58.1756	110.438	37.2164	19	0.373963	c.47.1.9	DsbC/DsbG C-terminal domain-like	0.32618	Metabolism	Oxidation/Reduction	ABEV	high_disorder
DS.HE.7.42.1	HE	7	42	1	15	4.33333	11.4937	80.2643	347.759	96.3143	26.3333	0.5097	c.47.1.9	DsbC/DsbG C-terminal domain-like	0.32618	Metabolism	Oxidation/Reduction	ABEV	high_disorder
DS.EG.0.4.6	EG	0	4	6	5.6	3	3.7678	124.933	14.664	36.6782	8.6	1	c.25.1.2	Aromatic dioxygenase reductase-like	0.32618	Metabolism	Oxidation/Reduction	ABE	high_disorder
DS.EH.4.151.1	EH	4	151	1	6	14.3333	9.289	140.889	168.191	61.2067	24.3333	0.24345	c.47.1.9	DsbC/DsbG C-terminal domain-like	0.32618	Metabolism	Oxidation/Reduction	ABEV	moderate_disorder
DS.EG.1.6.9	EG	1	6	9	2.8	3	5.6148	60.576	235.579	12.8956	6.8	1	c.55.1.13	CoaX-like	0.32618	Metabolism	Other enzymes	ABE	high_disorder
DS.EG.2.1.37	EG	2	1	37	5.25	3.75	8.99275	140.617	78.8407	34.6803	11	0.839286	c.55.1.13	CoaX-like	0.32618	Metabolism	Other enzymes	ABE	high_disorder
DS.EH.3.20.4	EH	3	20	4	4.75	16.25	8.82475	65.783	55.307	31.0293	24	0.145503	c.55.1.13	CoaX-like	0.32618	Metabolism	Other enzymes	ABE	moderate_disorder
DS.EH.3.33.1	EH	3	33	1	4.2	14	9.5706	83.4054	55.7374	36.4082	21.2	0.0736111	c.55.1.13	CoaX-like	0.32618	Metabolism	Other enzymes	ABE	ordered
DS.EH.3.8.5	EH	3	8	5	5.8	12	10.4048	146.695	15.7258	66.3832	20.8	0.512667	c.55.1.13	CoaX-like	0.32618	Metabolism	Other enzymes	ABE	high_disorder
DS.EH.5.89.1	EH	5	89	1	5.5	8.75	8.49575	163.812	57.8325	86.7698	19.25	0.387061	c.66.1.4	Hypothetical protein MJ0882	0.32618	Metabolism	Transferases	ABEV	high_disorder
DS.BK.6.42.1	BK	6	42	1	2.25	7	11.1988	131.123	329.957	75.1575	15.25	0.496875	c.47.1.9	DsbC/DsbG C-terminal domain-like	0.32618	Metabolism	Oxidation/Reduction	ABEV	high_disorder
DS.EH.5.2.1	EH	5	2	1	5.0625	9.375	9.41144	167.376	63.3038	95.1429	19.4375	0.444591	c.66.1.18	Mycolic acid cyclopropane synthase	0.32618	Metabolism	Transferases	ABEV	high_disorder
DS.HG.0.1.146	HG	0	1	146	7.5	4.5	2.241	36.514	150.471	71.5403	12	1	c.108.1.1	HAD-related	0.32618	Metabolism	Other enzymes	ABEV	high_disorder
DS.BN.2.3.60	BN	2	3	60	7.75	6	4.55425	166.708	31.4615	95.2785	15.75	0.640909	c.66.1.4	Hypothetical protein MJ0882	0.32618	Metabolism	Transferases	ABEV	high_disorder
DS.BN.2.2.33	BN	2	2	33	6.58824	6.94118	4.86159	137.785	332.894	93.2019	15.5294	0.642838	b.36.1.3	Tail specific protease PDZ domain	0.32618	Regulation	Signal transduction	ABE	high_disorder
DS.BN.7.12.1	BN	7	12	1	5.81818	5.36364	4.89773	150.505	340.031	98.7293	18.1818	0.645055	b.36.1.3	Tail specific protease PDZ domain	0.32618	Regulation	Signal transduction	ABE	high_disorder
DS.GE.3.72.1	GE	3	72	1	3	4.33333	12.5267	82.9993	84.0213	76.0507	10.3333	1	d.157.1.7	RNase Z-like	0.32618	Metabolism	Oxidation/Reduction	ABEV	high_disorder
DS.EH.3.4.7	EH	3	4	7	4.375	11	10.6242	122.422	33.6754	48.6698	18.375	0.490522	d.32.1.1	Glyoxalase I (lactoylglutathione lyase)	0.32618	Metabolism	Oxidation/Reduction	ABE	high_disorder
DS.HH.4.19.4	HH	4	19	4	9.66667	13	12.471	103.334	60.5787	20.3737	26.6667	0.546882	c.124.1.6	Methenyltetrahydrofolate synthetase	0.32618	Metabolism	Transferases	ABE	high_disorder
DS.HH.3.2.30	HH	3	2	30	10.3333	13	8.97467	93.4	22.6387	36.0637	26.3333	0.498413	c.124.1.6	Methenyltetrahydrofolate synthetase	0.32618	Metabolism	Transferases	ABE	high_disorder
DS.EH.3.2.9	EH	3	2	9	4.4	7	10.9058	164.862	143.674	63.3376	14.4	0.463866	c.120.1.1	PIN domain	0.32618	Other	Function unknown	ABEV	high_disorder
DS.HE.4.119.1	HE	4	119	1	9.66667	6.33333	7.2585	127.691	79.4372	70.3698	20	0.253264	c.124.1.6	Methenyltetrahydrofolate synthetase	0.32618	Metabolism	Transferases	ABE	moderate_disorder
DS.HE.2.46.1	HE	2	46	1	10.25	5	7.1085	112.125	108.283	58.127	17.25	0.64375	c.124.1.6	Methenyltetrahydrofolate synthetase	0.32618	Metabolism	Transferases	ABE	high_disorder
DS.HE.1.18.2	HE	1	18	2	4.75	4.25	6.81775	124.743	103.505	110.113	10	0.883333	c.124.1.6	Methenyltetrahydrofolate synthetase	0.32618	Metabolism	Transferases	ABE	high_disorder
DS.GE.2.2.25	GE	2	2	25	3	5	8.53533	137.898	98.285	86.1827	10	1	c.124.1.6	Methenyltetrahydrofolate synthetase	0.32618	Metabolism	Transferases	ABE	high_disorder
DS.BN.2.5.59	BN	2	5	59	7.33333	9.33333	4.79933	173.703	346.537	98.1437	18.6667	0.652174	c.124.1.6	Methenyltetrahydrofolate synthetase	0.32618	Metabolism	Transferases	ABE	high_disorder
DS.BN.2.4.24	BN	2	4	24	8.85714	6.57143	5.06929	122.529	332.565	100.215	17.4286	0.668737	c.124.1.6	Methenyltetrahydrofolate synthetase	0.32618	Metabolism	Transferases	ABE	high_disorder
DS.HG.2.4.8	HG	2	4	8	11	3	8.69275	80.1625	16.0428	38.927	16	0.785714	c.120.1.1	PIN domain	0.32618	Other	Function unknown	ABEV	high_disorder
DS.HH.3.1.20	HH	3	1	20	12.6667	8.66667	10.7963	106.325	62.9513	131.091	24.3333	0.424739	c.120.1.1	PIN domain	0.32618	Other	Function unknown	ABEV	high_disorder
DS.GE.6.8.1	GE	6	8	1	3	3.66667	14.709	57.93	13.9227	103.845	12.6667	1	b.36.1.3	Tail specific protease PDZ domain	0.32618	Regulation	Signal transduction	ABE	high_disorder
DS.HG.1.1.5	HG	1	1	5	11.2821	3.12821	4.30628	74.8982	51.4773	36.1566	15.4103	0.712129	a.60.9.1	lambda integrase-like, N-terminal domain	0.32618	Regulation	DNA-binding (transcription factors)	ABEV	high_disorder
DS.HH.5.3.6	HH	5	3	6	14	10.5	9.24675	141.273	356.868	95.6265	29.5	0.224618	d.153.1.6	Gamma-glutamyltranspeptidase-like	0.32618	Metabolism	Other enzymes	ABEV	moderate_disorder
DS.EG.0.8.2	EG	0	8	2	6.25	3	4.09425	104.635	173.593	8.38525	9.25	1	d.153.1.6	Gamma-glutamyltranspeptidase-like	0.32618	Metabolism	Other enzymes	ABEV	high_disorder
DS.GE.1.4.22	GE	1	4	22	3	4.33333	5.18133	25.5927	67.0677	70.3867	8.33333	1	c.92.2.2	TroA-like	0.32618	General	General or several functions	ABE	high_disorder
DS.EH.5.17.2	EH	5	17	2	3.5	9.66667	12.4443	159.209	163.089	51.113	18.1667	0.405387	b.36.1.3	Tail specific protease PDZ domain	0.32618	Regulation	Signal transduction	ABE	high_disorder
DS.BN.7.4.1	BN	7	4	1	5.31818	6.18182	4.76886	126.409	344.878	97.8381	18.5	0.593552	b.36.1.3	Tail specific protease PDZ domain	0.32618	Regulation	Signal transduction	ABE	high_disorder
DS.HG.2.22.1	HG	2	22	1	19	3	8.80167	137.164	340.631	93.203	24	0.407407	d.157.1.7	RNase Z-like	0.32618	Metabolism	Oxidation/Reduction	ABEV	high_disorder
DS.HE.5.46.3	HE	5	46	3	7.66667	6	10.9423	149.898	20.1747	63.4293	18.6667	0.833333	d.157.1.7	RNase Z-like	0.32618	Metabolism	Oxidation/Reduction	ABEV	high_disorder
DS.HE.4.22.3	HE	4	22	3	11.75	5.25	9.222	175.548	100.33	106.896	21	0.457306	d.157.1.7	RNase Z-like	0.32618	Metabolism	Oxidation/Reduction	ABEV	high_disorder
DS.BK.5.104.1	BK	5	104	1	7	3.66667	10.652	125.127	106.216	94.1423	15.6667	0.833333	d.157.1.7	RNase Z-like	0.32618	Metabolism	Oxidation/Reduction	ABEV	high_disorder
DS.HE.4.71.1	HE	4	71	1	11.5714	6.57143	6.94929	116.185	99.9163	92.9327	22.1429	0.346503	d.32.1.1	Glyoxalase I (lactoylglutathione lyase)	0.32618	Metabolism	Oxidation/Reduction	ABE	high_disorder
DS.EG.2.16.3	EG	2	16	3	7	3	6.73267	51.615	50.5593	76.3808	12	0.0972222	c.66.1.18	Mycolic acid cyclopropane synthase	0.32618	Metabolism	Transferases	ABEV	ordered
DS.EH.5.185.1	EH	5	185	1	6.33333	11.6667	15.442	35.972	239.084	64.7543	23	0.282805	c.69.1.7	Proline iminopeptidase-like	0.32618	Metabolism	Other enzymes	ABEV	moderate_disorder
DS.EH.5.92.1	EH	5	92	1	5	8.25	9.4855	143.715	157.635	97.7417	18.25	0.633772	c.67.1.7	Glycine dehydrogenase subunits (GDC-P)	0.32618	Metabolism	Transferases	ABEV	high_disorder
DS.HG.2.9.5	HG	2	9	5	7.25	3	8.34825	85.83	6.07025	51.205	12.25	0.90625	c.71.1.1	Dihydrofolate reductases	0.32618	Metabolism	Coenzyme metabolism	ABEV	high_disorder
DS.HG.1.1.49	HG	1	1	49	7	3.25	4.5	48.828	12.3462	64.015	11.25	0.767857	c.71.1.1	Dihydrofolate reductases	0.32618	Metabolism	Coenzyme metabolism	ABEV	high_disorder
DS.EH.3.67.2	EH	3	67	2	4	6.66667	10.8887	140.614	126.248	23.1257	13.6667	0.206731	c.71.1.1	Dihydrofolate reductases	0.32618	Metabolism	Coenzyme metabolism	ABEV	moderate_disorder
DS.EH.10.2.1	EH	10	2	1	3	11.6	16.4614	104.932	189.228	96.4728	24.6	0.528	c.71.1.1	Dihydrofolate reductases	0.32618	Metabolism	Coenzyme metabolism	ABEV	high_disorder
DS.EH.4.124.1	EH	4	124	1	3.66667	9.66667	8.76733	158.504	48.0603	71.993	17.3333	0.637566	c.124.1.7	YkgG-like	0.32618	Metabolism	Transferases	AB	high_disorder
DS.GE.5.8.1	GE	5	8	1	3	7.25	12.5213	131.947	15.0137	85.4435	15.25	0.525794	c.124.1.7	YkgG-like	0.32618	Metabolism	Transferases	AB	high_disorder
DS.BK.7.31.1	BK	7	31	1	8.33333	2	15.3797	124.787	234.485	101.53	17.3333	0.648148	c.71.1.1	Dihydrofolate reductases	0.32618	Metabolism	Coenzyme metabolism	ABEV	high_disorder
DS.BK.4.50.1	BK	4	50	1	7.42857	2.85714	5.40257	122.141	353.341	68.9773	14.2857	0.546939	c.71.1.1	Dihydrofolate reductases	0.32618	Metabolism	Coenzyme metabolism	ABEV	high_disorder
DS.BK.11.7.1	BK	11	7	1	4.66667	3	8.088	27.5833	197.017	143.392	18.6667	0.466862	c.71.1.1	Dihydrofolate reductases	0.32618	Metabolism	Coenzyme metabolism	ABEV	high_disorder
DS.GG.2.2.11	GG	2	2	11	3	3	10.2217	126.762	351.938	77.8113	8	1	d.117.1.1	Thymidylate synthase/dCMP hydroxymethylase	0.32618	Metabolism	Nucleotide transport and metabolism	ABEV	high_disorder
DS.GE.6.7.1	GE	6	7	1	3	8.33333	16.3413	110.077	336.372	128.984	17.3333	0.115468	d.117.1.1	Thymidylate synthase/dCMP hydroxymethylase	0.32618	Metabolism	Nucleotide transport and metabolism	ABEV	moderate_disorder
DS.BN.6.29.1	BN	6	29	1	7	6.55556	4.26989	114.137	353.19	86.4573	19.5556	0.547617	b.68.2.1	Soluble quinoprotein glucose dehydrogenase	0.32618	Metabolism	Other enzymes	ABE	high_disorder
DS.BN.2.19.5	BN	2	19	5	2	2	4.38367	131.113	2.81733	104.909	6	1	b.68.2.1	Soluble quinoprotein glucose dehydrogenase	0.32618	Metabolism	Other enzymes	ABE	high_disorder
DS.HE.2.2.7	HE	2	2	7	7.8125	5.6875	7.30994	108.172	74.7065	64.6307	15.5	0.712609	c.124.1.7	YkgG-like	0.32618	Metabolism	Transferases	AB	high_disorder
DS.EH.3.28.2	EH	3	28	2	12	19.8333	4.624	104.045	107.109	61.6763	34.8333	0.117817	d.117.1.1	Thymidylate synthase/dCMP hydroxymethylase	0.32618	Metabolism	Nucleotide transport and metabolism	ABEV	moderate_disorder
DS.HG.5.18.1	HG	5	18	1	9.33333	3	17.478	100.1	280.343	143.131	17.3333	0.854167	c.69.1.18	Bacterial lipase	0.32618	Metabolism	Other enzymes	ABEV	high_disorder
DS.GE.1.4.14	GE	1	4	14	3	4	5.03033	69.7583	144.001	96.6653	8	1	c.69.1.18	Bacterial lipase	0.32618	Metabolism	Other enzymes	ABEV	high_disorder
DS.EH.2.40.1	EH	2	40	1	4.25	13.75	9.01325	71.2445	329.708	14.6527	20	0.531341	c.69.1.18	Bacterial lipase	0.32618	Metabolism	Other enzymes	ABEV	high_disorder
DS.EH.5.66.1	EH	5	66	1	3.4	14.6	13.301	128.224	339.111	52.5536	23	0.449114	c.67.1.7	Glycine dehydrogenase subunits (GDC-P)	0.32618	Metabolism	Transferases	ABEV	high_disorder
DS.HE.3.153.1	HE	3	153	1	10.6667	7.66667	9.00133	148.897	81.7077	76.2023	21.3333	0.267974	c.108.1.1	HAD-related	0.32618	Metabolism	Other enzymes	ABEV	moderate_disorder
DS.EG.6.7.1	EG	6	7	1	4	3	13.4267	74.3147	318.244	53.6017	13	1	d.117.1.1	Thymidylate synthase/dCMP hydroxymethylase	0.32618	Metabolism	Nucleotide transport and metabolism	ABEV	high_disorder
DS.EG.3.26.2	EG	3	26	2	8.33333	4	11.5387	143.203	102.918	22.935	15.3333	0.526316	c.1.32.1	TM1631-like	0.32618	N_A	not annotated	ABEV	high_disorder
DS.HE.4.9.5	HE	4	9	5	12.75	6	7.594	151.589	56.5093	65.1904	22.75	0.266247	c.1.32.1	TM1631-like	0.32618	N_A	not annotated	ABEV	moderate_disorder
DS.HH.6.2.2	HH	6	2	2	16.8333	10.1667	15.4242	103.1	331.965	127.983	33	0.357373	c.108.1.1	HAD-related	0.32618	Metabolism	Other enzymes	ABEV	high_disorder
DS.EH.3.7.13	EH	3	7	13	6	10.6667	10.9923	129.21	350.226	82.3387	19.6667	0.338596	c.108.1.1	HAD-related	0.32618	Metabolism	Other enzymes	ABEV	high_disorder
DS.HH.2.11.4	HH	2	11	4	10	8.66667	7.08667	72.0983	322.745	19.2463	20.6667	0.751748	c.67.1.7	Glycine dehydrogenase subunits (GDC-P)	0.32618	Metabolism	Transferases	ABEV	high_disorder
DS.HE.3.2.14	HE	3	2	14	4	4.5	10.6813	143.173	322.511	140.475	11.5	1	c.67.1.7	Glycine dehydrogenase subunits (GDC-P)	0.32618	Metabolism	Transferases	ABEV	high_disorder
DS.HE.9.7.1	HE	9	7	1	7	4	22.9847	86.003	75.285	55.2097	20	0.666667	d.117.1.1	Thymidylate synthase/dCMP hydroxymethylase	0.32618	Metabolism	Nucleotide transport and metabolism	ABEV	high_disorder
DS.HE.2.15.3	HE	2	15	3	12.6	5.2	8.8884	166.89	33.519	118.401	19.8	0.56532	d.58.18.5	Glycine cleavage system transcriptional repressor	0.32618	Metabolism	Amino acid transport and metabolism	ABE	high_disorder
DS.EG.3.12.2	EG	3	12	2	4.2	3	12.6222	76.3384	297.431	18.0886	10.2	0.8	d.227.1.2	YhfA-like	0.32618	Regulation	Other regulatory function	ABE	high_disorder
DS.HE.7.33.1	HE	7	33	1	11	3	13.7057	174.71	152.109	146.261	21	0.650794	d.117.1.1	Thymidylate synthase/dCMP hydroxymethylase	0.32618	Metabolism	Nucleotide transport and metabolism	ABEV	high_disorder
DS.GH.1.2.18	GH	1	2	18	3	12.6667	6.46767	145.978	72.2143	97.8347	16.6667	0.83989	c.69.1.7	Proline iminopeptidase-like	0.32618	Metabolism	Other enzymes	ABEV	high_disorder
DS.HG.1.10.1	HG	1	10	1	11.2	3	3.5864	81.7182	37.643	58.5214	15.2	0.486667	c.69.1.7	Proline iminopeptidase-like	0.32618	Metabolism	Other enzymes	ABEV	high_disorder
DS.GH.0.4.2	GH	0	4	2	5.33333	12.6667	3.75933	113.239	78.7723	68.4213	18	0.833333	c.69.1.7	Proline iminopeptidase-like	0.32618	Metabolism	Other enzymes	ABEV	high_disorder
DS.HE.1.4.1	HE	1	4	1	8.92	4.44	5.67472	103.746	109.61	80.1338	14.36	0.601733	c.120.1.1	PIN domain	0.32618	Other	Function unknown	ABEV	high_disorder
DS.EH.4.34.2	EH	4	34	2	6	8.33333	7.611	143.979	50.744	78.5823	18.3333	0.134211	c.108.1.1	HAD-related	0.32618	Metabolism	Other enzymes	ABEV	moderate_disorder
DS.GE.2.1.13	GE	2	1	13	3.5	5.16667	7.7915	126.007	50.2233	95.8533	10.6667	0.571429	c.108.1.1	HAD-related	0.32618	Metabolism	Other enzymes	ABEV	high_disorder
DS.HG.3.3.5	HG	3	3	5	14.1667	3	6.38183	80.3722	58.9883	86.6603	20.1667	0.422851	d.227.1.2	YhfA-like	0.32618	Regulation	Other regulatory function	ABE	high_disorder
DS.HH.5.24.2	HH	5	24	2	13.6667	7.66667	11.7343	141.511	328.342	101.909	26.3333	0.326993	d.117.1.1	Thymidylate synthase/dCMP hydroxymethylase	0.32618	Metabolism	Nucleotide transport and metabolism	ABEV	high_disorder
DS.GH.0.1.95	GH	0	1	95	3	9.2	3.1454	14.351	93.6602	94.4174	12.2	0.85	a.184.1.1	TorD-like	0.330472	Intracellular_processes	Posttranslational modification, protein turnover, chaperones	AB	high_disorder
DS.HG.3.4.5	HG	3	4	5	17	4.66667	11.103	79.933	356.086	128.868	24.6667	0.267816	a.100.1.7	Ketopantoate reductase PanE	0.330472	Metabolism	Energy production and conversion	ABE	moderate_disorder
DS.EH.3.126.1	EH	3	126	1	4.66667	23.6667	10.6007	75.37	152.081	61.3693	31.3333	0.418501	d.21.1.2	PhzC/PhzF-like	0.330472	Metabolism	Amino acid transport and metabolism	ABE	high_disorder
DS.GH.1.1.5	GH	1	1	5	3.24138	8.44828	5.787	76.755	188.844	76.742	12.6897	0.874673	a.184.1.1	TorD-like	0.330472	Intracellular_processes	Posttranslational modification, protein turnover, chaperones	AB	high_disorder
DS.GG.1.14.1	GG	1	14	1	3.33333	3	6.05733	74.1373	129.741	121.549	7.33333	1	d.250.1.1	Aminomethyltransferase folate-binding domain	0.330472	Metabolism	Other enzymes	ABE	high_disorder
DS.GH.1.2.15	GH	1	2	15	3.42857	10.4286	5.53843	96.1509	98.1867	65.1624	14.8571	0.765437	a.100.1.7	Ketopantoate reductase PanE	0.330472	Metabolism	Energy production and conversion	ABE	high_disorder
DS.HH.2.2.16	HH	2	2	16	5.7	11.4	6.6948	60.9445	298.824	39.7722	19.1	0.569762	a.184.1.1	TorD-like	0.330472	Intracellular_processes	Posttranslational modification, protein turnover, chaperones	AB	high_disorder
DS.HH.4.26.1	HH	4	26	1	13	6.5	9.14525	49.743	55.2925	54.981	23.5	0.347467	a.184.1.1	TorD-like	0.330472	Intracellular_processes	Posttranslational modification, protein turnover, chaperones	AB	high_disorder
DS.BN.5.137.1	BN	5	137	1	5	5.66667	4.902	160.264	345.21	99.3713	15.6667	0.647059	d.250.1.1	Aminomethyltransferase folate-binding domain	0.330472	Metabolism	Other enzymes	ABE	high_disorder
DS.BK.3.36.2	BK	3	36	2	3	6.66667	8.52767	63.6223	152.646	28.0923	12.6667	0.761905	d.250.1.1	Aminomethyltransferase folate-binding domain	0.330472	Metabolism	Other enzymes	ABE	high_disorder
DS.BK.3.49.1	BK	3	49	1	3.42857	7.85714	7.11143	111.898	153.594	57.1529	14.2857	0.31422	d.104.1.3	LplA-like	0.330472	Metabolism	Coenzyme metabolism	ABE	high_disorder
DS.BN.2.1.28	BN	2	1	28	5.75556	6.17778	4.85862	132.098	339.878	107.839	13.9333	0.627517	d.104.1.3	LplA-like	0.330472	Metabolism	Coenzyme metabolism	ABE	high_disorder
DS.EH.5.110.1	EH	5	110	1	5	13.3333	15.2597	160.019	331.141	51.6	23.3333	0.258571	d.104.1.3	LplA-like	0.330472	Metabolism	Coenzyme metabolism	ABE	moderate_disorder
DS.EH.3.16.1	EH	3	16	1	6	7	6.42108	121.979	64.4372	59.3429	16	0.600163	d.250.1.1	Aminomethyltransferase folate-binding domain	0.330472	Metabolism	Other enzymes	ABE	high_disorder
DS.BN.2.1.88	BN	2	1	88	5.25	2.25	4.7065	115.507	343.607	99.223	9.5	1	d.66.1.3	Heat shock protein 15 kD	0.330472	Regulation	RNA processing and modification	ABE	high_disorder
DS.EH.1.2.1	EH	1	2	1	4.8	10.56	6.45576	79.5518	164.53	19.0621	16.36	0.570659	d.250.1.1	Aminomethyltransferase folate-binding domain	0.330472	Metabolism	Other enzymes	ABE	high_disorder
DS.BN.8.43.1	BN	8	43	1	5.66667	6.66667	7.681	152.043	322.456	50.8407	20.3333	0.457811	d.250.1.1	Aminomethyltransferase folate-binding domain	0.330472	Metabolism	Other enzymes	ABE	high_disorder
DS.EG.0.3.5	EG	0	3	5	5.85714	3.42857	3.23257	95.2731	354.003	25.8589	9.28571	0.879121	b.44.2.1	Aminomethyltransferase beta-barrel domain	0.330472	Metabolism	Other enzymes	ABE	high_disorder
DS.GE.2.70.1	GE	2	70	1	3	5.33333	9.59933	79.071	78.3863	109.476	10.3333	1	d.250.1.1	Aminomethyltransferase folate-binding domain	0.330472	Metabolism	Other enzymes	ABE	high_disorder
DS.EH.3.16.4	EH	3	16	4	6.33333	8	7.211	126.041	54.243	68.852	17.3333	0.406318	d.250.1.1	Aminomethyltransferase folate-binding domain	0.330472	Metabolism	Other enzymes	ABE	high_disorder
DS.GE.3.54.1	GE	3	54	1	3	4.25	10.6028	123.502	63.588	115.15	10.25	1	c.124.1.4	D-ribose-5-phosphate isomerase (RpiA), catalytic domain	0.330472	Metabolism	Transferases	ABE	high_disorder
DS.EH.1.9.8	EH	1	9	8	4.33333	9.66667	6.277	108.499	45.9537	53.0623	15	0.5	d.106.1.1	Sterol carrier protein, SCP	0.330472	Metabolism	Coenzyme metabolism	ABE	high_disorder
DS.EH.0.1.55	EH	0	1	55	4.75	5.25	3.388	94.4488	141.934	10.0121	10	0.913462	d.106.1.1	Sterol carrier protein, SCP	0.330472	Metabolism	Coenzyme metabolism	ABE	high_disorder
DS.HG.0.1.129	HG	0	1	129	6	4.75	2.3055	17.6457	85.0085	52.5382	10.75	0.5	d.58.40.1	D-ribose-5-phosphate isomerase (RpiA), lid domain	0.330472	Metabolism	Carbohydrate transport and metabolism	ABE	high_disorder
DS.HH.1.3.41	HH	1	3	41	16	15	5.51467	77.005	150.772	48.6687	32	0.334604	d.106.1.1	Sterol carrier protein, SCP	0.330472	Metabolism	Coenzyme metabolism	ABE	high_disorder
DS.HH.1.1.94	HH	1	1	94	12	12.8	4.794	38.748	124.457	9.6126	25.8	0.313232	f.21.3.1	Respiratory nitrate reductase 1 gamma chain	0.330472	Metabolism	Electron transfer/transport	AB	high_disorder
DS.BK.4.199.1	BK	4	199	1	5	4.66667	13.377	92.4783	63.105	39.052	13.6667	0.736842	d.144.1.9	RIO1-like kinases	0.330472	Regulation	Kinases and phosphatases and inhibitors	ABEV	high_disorder
DS.HH.5.6.1	HH	5	6	1	11.8571	9.57143	8.899	141.246	56.4581	82.8593	26.4286	0.414182	d.106.1.1	Sterol carrier protein, SCP	0.330472	Metabolism	Coenzyme metabolism	ABE	high_disorder
DS.HH.1.3.24	HH	1	3	24	11.6	7.8	5.5672	76.2974	189.713	68.0456	20.4	0.578397	f.21.3.1	Respiratory nitrate reductase 1 gamma chain	0.330472	Metabolism	Electron transfer/transport	AB	high_disorder
DS.GE.0.1.8	GE	0	1	8	4.63889	4.63889	3.21078	74.0709	121.687	68.1888	9.27778	0.897436	d.66.1.3	Heat shock protein 15 kD	0.330472	Regulation	RNA processing and modification	ABE	high_disorder
DS.HE.3.4.12	HE	3	4	12	8.25	3.375	6.36575	67.6988	161.599	76.3101	14.625	0.47384	d.66.1.3	Heat shock protein 15 kD	0.330472	Regulation	RNA processing and modification	ABE	high_disorder
DS.EH.5.71.1	EH	5	71	1	4.75	8.25	10.3212	149.695	21.7575	63.7692	18	0.58676	c.88.1.1	Glutaminase/Asparaginase	0.330472	Metabolism	Amino acid transport and metabolism	ABE	high_disorder
DS.GH.2.3.15	GH	2	3	15	3	10.8	9.3368	143.46	60.8008	79.7988	15.8	0.695227	c.88.1.1	Glutaminase/Asparaginase	0.330472	Metabolism	Amino acid transport and metabolism	ABE	high_disorder
DS.BN.8.28.1	BN	8	28	1	7.75	6.5	4.44275	141.046	346.786	95.9688	22.25	0.271645	d.21.1.2	PhzC/PhzF-like	0.330472	Metabolism	Amino acid transport and metabolism	ABE	moderate_disorder
DS.HE.6.2.2	HE	6	2	2	11.5	4.75	8.60375	155.262	43.7215	72.69	22.25	0.300197	c.88.1.1	Glutaminase/Asparaginase	0.330472	Metabolism	Amino acid transport and metabolism	ABE	high_disorder
DS.BN.5.27.2	BN	5	27	2	5.66667	6.33333	4.27367	138.789	11.0297	86.281	17	0.474074	d.21.1.2	PhzC/PhzF-like	0.330472	Metabolism	Amino acid transport and metabolism	ABE	high_disorder
DS.EH.3.47.1	EH	3	47	1	4.6	9	6.4806	118.352	159.021	85.4158	16.6	0.8	c.6.2.5	LamB/YcsF-like	0.330472	Metabolism	Other enzymes	ABE	high_disorder
DS.HE.3.69.1	HE	3	69	1	12.5	4.83333	10.697	169.729	154.377	130.777	20.3333	0.480615	c.6.2.5	LamB/YcsF-like	0.330472	Metabolism	Other enzymes	ABE	high_disorder
DS.BN.5.117.1	BN	5	117	1	5	5.33333	5.87867	141.156	329.888	68.9027	15.3333	0.796296	d.21.1.2	PhzC/PhzF-like	0.330472	Metabolism	Amino acid transport and metabolism	ABE	high_disorder
DS.BN.4.130.1	BN	4	130	1	7.33333	7	4.39267	109.843	354.234	91.2683	18.3333	0.690351	d.21.1.2	PhzC/PhzF-like	0.330472	Metabolism	Amino acid transport and metabolism	ABE	high_disorder
DS.BN.2.2.37	BN	2	2	37	5.23077	5.69231	4.63815	168.318	3.23069	97.347	12.9231	0.737364	d.66.1.3	Heat shock protein 15 kD	0.330472	Regulation	RNA processing and modification	ABE	high_disorder
DS.HE.4.66.3	HE	4	66	3	11.6667	5	8.27433	145.003	28.9493	115.803	20.6667	0.539394	d.142.2.1	ATP-dependent DNA ligase catalytic domain	0.330472	Information	DNA replication, recombination, repair	ABEV	high_disorder
DS.BK.3.100.1	BK	3	100	1	5	6.25	10.6538	106.14	101.737	35.8995	14.25	0.838235	d.142.2.1	ATP-dependent DNA ligase catalytic domain	0.330472	Information	DNA replication, recombination, repair	ABEV	high_disorder
DS.HH.1.5.2	HH	1	5	2	12.6364	13.4545	6.39345	63.1068	67.5615	100.069	27.0909	0.40059	f.48.1.1	OmpH-like	0.330472	Metabolism	Cell envelope biogenesis, outer membrane	BE	high_disorder
DS.HE.4.1.34	HE	4	1	34	18	6	10.1257	140.89	28.258	108.385	28	0.371415	f.48.1.1	OmpH-like	0.330472	Metabolism	Cell envelope biogenesis, outer membrane	BE	high_disorder
DS.BN.2.5.66	BN	2	5	66	9	7.66667	4.49867	173.637	36.3	93.3723	18.6667	0.332198	d.21.1.2	PhzC/PhzF-like	0.330472	Metabolism	Amino acid transport and metabolism	ABE	high_disorder
DS.BN.4.1.16	BN	4	1	16	6.25	5.75	4.7445	178.523	104.159	100.353	16	0.56131	c.58.1.1	Aminoacid dehydrogenases	0.330472	Metabolism	Oxidation/Reduction	ABEV	high_disorder
DS.EH.6.104.1	EH	6	104	1	2	9	11.1033	141.208	50.804	52.551	17	0.509804	c.124.1.4	D-ribose-5-phosphate isomerase (RpiA), catalytic domain	0.330472	Metabolism	Transferases	ABE	high_disorder
DS.EG.6.5.1	EG	6	5	1	5.75	6.25	7.4945	115.656	9.74175	69.0438	18	0.161581	c.69.1.26	Biotin biosynthesis protein BioH	0.330472	Metabolism	Other enzymes	ABEV	moderate_disorder
DS.HE.3.125.1	HE	3	125	1	13.25	4.25	9.655	166.734	170.555	129.551	20.5	0.381579	d.58.52.1	Sporulation related repeat	0.330472	Other	Function unknown	BV	high_disorder
DS.BN.2.42.2	BN	2	42	2	5	4.75	5.33525	163.852	266.427	116.261	11.75	0.6375	c.135.1.1	NIF3 (NGG1p interacting factor 3)-like	0.330472	General	Protein-protein interaction (dimerization domains)	ABEV	high_disorder
DS.EH.4.18.1	EH	4	18	1	5.33333	9.83333	11.4087	163.604	303.012	85.6582	19.1667	0.382022	c.135.1.1	NIF3 (NGG1p interacting factor 3)-like	0.330472	General	Protein-protein interaction (dimerization domains)	ABEV	high_disorder
DS.GE.1.43.1	GE	1	43	1	3	5	5.75175	74.7973	126.595	75.8757	9	1	c.135.1.1	NIF3 (NGG1p interacting factor 3)-like	0.330472	General	Protein-protein interaction (dimerization domains)	ABEV	high_disorder
DS.EH.2.1.21	EH	2	1	21	5.47826	9.95652	7.71991	155.801	112.448	58.4875	17.4348	0.562135	c.124.1.4	D-ribose-5-phosphate isomerase (RpiA), catalytic domain	0.330472	Metabolism	Transferases	ABE	high_disorder
DS.HH.1.1.141	HH	1	1	141	4	4	4.8105	37.9853	54.7845	110.067	9	1	c.69.1.8	Haloalkane dehalogenase	0.330472	Metabolism	Other enzymes	ABEV	high_disorder
DS.HE.6.28.1	HE	6	28	1	12.5	4	12.6575	163.288	7.82475	126.367	22.5	0.25	c.135.1.1	NIF3 (NGG1p interacting factor 3)-like	0.330472	General	Protein-protein interaction (dimerization domains)	ABEV	moderate_disorder
DS.HG.2.8.3	HG	2	8	3	7.75	3	8.4175	21.6842	15.4812	94.2188	12.75	0.78125	c.135.1.1	NIF3 (NGG1p interacting factor 3)-like	0.330472	General	Protein-protein interaction (dimerization domains)	ABEV	high_disorder
DS.HE.4.4.3	HE	4	4	3	10.8333	4.5	9.33242	154.942	350.705	111.876	19.3333	0.425002	c.135.1.1	NIF3 (NGG1p interacting factor 3)-like	0.330472	General	Protein-protein interaction (dimerization domains)	ABEV	high_disorder
DS.EH.4.36.1	EH	4	36	1	5.4	16.6	12.6132	146.86	333.297	73.474	26	0.487009	c.58.1.1	Aminoacid dehydrogenases	0.330472	Metabolism	Oxidation/Reduction	ABEV	high_disorder
DS.EH.2.80.1	EH	2	80	1	3	14	9.531	116.468	57.6657	34.7133	19	0.491546	d.21.1.2	PhzC/PhzF-like	0.330472	Metabolism	Amino acid transport and metabolism	ABE	high_disorder
DS.HE.4.48.3	HE	4	48	3	15.3333	4.33333	7.726	146.079	129.633	81.254	23.6667	0.199275	c.58.1.1	Aminoacid dehydrogenases	0.330472	Metabolism	Oxidation/Reduction	ABEV	moderate_disorder
DS.EH.5.44.1	EH	5	44	1	5	15.3333	12.4682	143.216	325.195	98.9172	25.3333	0.30604	c.58.1.1	Aminoacid dehydrogenases	0.330472	Metabolism	Oxidation/Reduction	ABEV	high_disorder
DS.HE.4.193.1	HE	4	193	1	12.6667	6.33333	7.16533	157.569	94.71	55.1393	23	0.631111	c.23.5.8	WrbA-like	0.334764	Metabolism	Oxidation/Reduction	ABE	high_disorder
DS.BN.2.26.2	BN	2	26	2	6.83333	4.83333	4.60267	119.612	335.926	93.1032	13.6667	0.922222	c.23.5.8	WrbA-like	0.334764	Metabolism	Oxidation/Reduction	ABE	high_disorder
DS.HG.0.1.178	HG	0	1	178	7.66667	3.33333	2.49733	3.93033	348.217	65.922	11	1	c.72.2.2	Folylpolyglutamate synthetase	0.334764	Intracellular_processes	Proteases, peptidases and their inhibitors	ABEV	high_disorder
DS.EH.0.4.10	EH	0	4	10	9	5.66667	3.827	102.159	202.207	20.5817	14.6667	0.277778	d.81.2.1	Serine dehydratase beta chain-like	0.334764	Metabolism	Amino acid transport and metabolism	ABE	moderate_disorder
DS.HH.5.1.24	HH	5	1	24	9.33333	19	9.50133	169.752	97.6147	83.4257	33.3333	0.307843	a.24.16.4	Glutamine synthase adenylyltransferase GlnE, domain 2	0.334764	Metabolism	Nucleotide transport and metabolism	AB	high_disorder
DS.HE.3.18.5	HE	3	18	5	15	4.83333	10.5207	165.867	195.238	125.96	22.8333	0.452818	c.72.2.2	Folylpolyglutamate synthetase	0.334764	Intracellular_processes	Proteases, peptidases and their inhibitors	ABEV	high_disorder
DS.GE.3.38.1	GE	3	38	1	3.5	6	10.8133	69.1473	12.2807	81.5637	12.5	0.922222	b.124.1.1	HesB-like domain	0.334764	Other	Function unknown	ABEV	high_disorder
DS.GE.2.1.22	GE	2	1	22	3	6	8.64767	129.27	23.891	114.989	11	0.809524	c.1.12.7	Phosphoenolpyruvate mutase/Isocitrate lyase-like	0.334764	Metabolism	Energy production and conversion	ABE	high_disorder
DS.HG.1.3.10	HG	1	3	10	11.4	3.2	6.1836	100.034	163.179	51.9748	15.6	0.60049	c.23.5.8	WrbA-like	0.334764	Metabolism	Oxidation/Reduction	ABE	high_disorder
DS.EG.7.9.1	EG	7	9	1	4	4	11.3163	119.975	279.069	66.9777	15	1	c.72.2.2	Folylpolyglutamate synthetase	0.334764	Intracellular_processes	Proteases, peptidases and their inhibitors	ABEV	high_disorder
DS.HE.3.12.5	HE	3	12	5	15	5	10.6124	155.598	30.9652	124.124	23	0.265863	c.1.12.7	Phosphoenolpyruvate mutase/Isocitrate lyase-like	0.334764	Metabolism	Energy production and conversion	ABE	moderate_disorder
DS.HE.5.67.1	HE	5	67	1	7.66667	5.33333	9.11233	162.702	10.488	75.8543	18	0.381481	d.157.1.9	YhfI-like	0.334764	Metabolism	Oxidation/Reduction	ABEV	high_disorder
DS.HE.6.85.1	HE	6	85	1	10.6667	4.33333	9.42767	158.008	26.201	95.4997	21	0.409502	c.1.12.7	Phosphoenolpyruvate mutase/Isocitrate lyase-like	0.334764	Metabolism	Energy production and conversion	ABE	high_disorder
DS.BN.2.6.63	BN	2	6	63	8.33333	4	5.03433	165.388	1.91067	112.255	14.3333	0.604167	c.23.5.8	WrbA-like	0.334764	Metabolism	Oxidation/Reduction	ABE	high_disorder
DS.HH.5.22.3	HH	5	22	3	10.3333	11	11.0093	60.6317	11.2157	121.75	26.3333	0.583333	a.24.16.4	Glutamine synthase adenylyltransferase GlnE, domain 2	0.334764	Metabolism	Nucleotide transport and metabolism	AB	high_disorder
DS.HE.2.2.14	HE	2	2	14	9	5.66667	7.24817	140.185	84.8862	69.8383	16.6667	0.648991	c.23.5.8	WrbA-like	0.334764	Metabolism	Oxidation/Reduction	ABE	high_disorder
DS.EH.2.19.5	EH	2	19	5	5	10.6667	6.76	37.32	22.1267	31.807	17.6667	0.0392157	c.1.12.7	Phosphoenolpyruvate mutase/Isocitrate lyase-like	0.334764	Metabolism	Energy production and conversion	ABE	ordered
DS.EH.1.2.24	EH	1	2	24	4.7	10.6	6.4263	87.1352	80.6814	19.5115	16.3	0.606663	b.124.1.1	HesB-like domain	0.334764	Other	Function unknown	ABEV	high_disorder
DS.EG.3.15.2	EG	3	15	2	6	3	9.8425	52.6713	10.771	61.7837	12	0.839286	c.1.12.7	Phosphoenolpyruvate mutase/Isocitrate lyase-like	0.334764	Metabolism	Energy production and conversion	ABE	high_disorder
DS.BN.2.5.68	BN	2	5	68	6.33333	4.66667	4.99233	176.195	249.836	97.658	13	0.416667	c.8.7.1	RraA-like	0.334764	Metabolism	Coenzyme metabolism	ABEV	high_disorder
DS.HE.4.15.2	HE	4	15	2	10.8261	5.04348	10.364	153.086	154.478	105.256	19.8696	0.373466	c.47.1.12	ArsC-like	0.334764	Metabolism	Oxidation/Reduction	ABEV	high_disorder
DS.BN.2.5.55	BN	2	5	55	7.75	7.5	4.905	174.737	214.82	100.878	17.25	0.264683	c.8.7.1	RraA-like	0.334764	Metabolism	Coenzyme metabolism	ABEV	moderate_disorder
DS.EH.0.7.1	EH	0	7	1	6.75	13	3.24675	106.025	113.114	18.6983	19.75	0.663156	d.67.1.2	AlaX-like	0.334764	Information	Translation, ribosomes, ribosome biogenesis; tRNA metabolism	ABE	high_disorder
DS.GE.3.28.2	GE	3	28	2	3	8	8.46333	125.245	212.871	121.852	14	0.705882	d.310.1.1	VC0467-like	0.334764	N_A	not annotated	BE	high_disorder
DS.HG.0.1.123	HG	0	1	123	4	3	3.6348	8.6948	319.445	95.268	7	1	d.310.1.1	VC0467-like	0.334764	N_A	not annotated	BE	high_disorder
DS.GE.2.52.1	GE	2	52	1	3.25	6	9.187	72.4285	58.7178	75.2258	11.25	0.770833	d.67.1.2	AlaX-like	0.334764	Information	Translation, ribosomes, ribosome biogenesis; tRNA metabolism	ABE	high_disorder
DS.HH.5.16.1	HH	5	16	1	8.14286	10.8571	11.4277	123.953	339.488	52.4651	24	0.49047	d.224.1.1	SufE-like	0.334764	Intracellular_processes	Inorganic ion transport and metabolism	ABE	high_disorder
DS.HE.3.55.2	HE	3	55	2	8.8	2.8	9.1624	24.215	56.9344	21.548	14.6	0.866667	d.218.1.9	GlnE-like domain	0.334764	Metabolism	Nucleotide transport and metabolism	B	high_disorder
DS.HH.1.8.2	HH	1	8	2	7.25	6	6.63875	34.148	117.584	98.9385	14.25	0.84375	d.224.1.1	SufE-like	0.334764	Intracellular_processes	Inorganic ion transport and metabolism	ABE	high_disorder
DS.BK.4.171.1	BK	4	171	1	2.66667	4	12.3123	82.7007	116.465	33.0523	10.6667	1	c.8.7.1	RraA-like	0.334764	Metabolism	Coenzyme metabolism	ABEV	high_disorder
DS.BN.2.2.51	BN	2	2	51	5.44444	6.33333	4.68811	166.247	356.375	93.2888	13.7778	0.61652	b.124.1.1	HesB-like domain	0.334764	Other	Function unknown	ABEV	high_disorder
DS.BN.2.49.1	BN	2	49	1	7.83333	7.66667	5.125	145.614	329.712	108.111	17.5	0.346401	b.124.1.1	HesB-like domain	0.334764	Other	Function unknown	ABEV	high_disorder
DS.HE.2.18.2	HE	2	18	2	5.5	8.33333	6.20367	61.4785	27.7157	32.6962	15.8333	0.644231	d.58.32.2	D-lactate dehydrogenase	0.334764	Metabolism	Oxidation/Reduction	ABE	high_disorder
DS.HE.5.31.4	HE	5	31	4	10.3333	5	12.4667	164.171	349.731	117.206	20.3333	0.5075	c.59.1.2	Folylpolyglutamate synthetase, C-terminal domain	0.334764	Metabolism	Other enzymes	ABE	high_disorder
DS.HE.4.33.1	HE	4	33	1	13.5	4.1	11.6079	166.477	64.8602	124.339	21.6	0.326583	c.59.1.2	Folylpolyglutamate synthetase, C-terminal domain	0.334764	Metabolism	Other enzymes	ABE	high_disorder
DS.EH.2.10.1	EH	2	10	1	3.86667	8.26667	9.1008	115.304	149.738	30.4277	14.1333	0.671789	d.58.32.2	D-lactate dehydrogenase	0.334764	Metabolism	Oxidation/Reduction	ABE	high_disorder
DS.HH.3.2.33	HH	3	2	33	7.33333	17.6667	10.1773	111.259	138.793	19.1043	28	0.501035	c.1.12.3	Phosphoenolpyruvate carboxylase	0.339056	Metabolism	Energy production and conversion	ABE	high_disorder
DS.HH.3.5.10	HH	3	5	10	11.6667	16	7.80567	137.777	186.744	86.2567	30.6667	0.490039	c.1.12.3	Phosphoenolpyruvate carboxylase	0.339056	Metabolism	Energy production and conversion	ABE	high_disorder
DS.HE.4.9.17	HE	4	9	17	9.66667	6.66667	7.061	130.998	28.293	61.866	20.3333	0.416546	c.26.1.2	Cytidylyltransferase	0.339056	Metabolism	Nucleotide transport and metabolism	ABEV	high_disorder
DS.EH.5.174.1	EH	5	174	1	6.33333	10.6667	10.4717	150.154	15.4823	82.258	22	0.731183	c.26.1.2	Cytidylyltransferase	0.339056	Metabolism	Nucleotide transport and metabolism	ABEV	high_disorder
DS.GH.1.1.31	GH	1	1	31	3.16667	10.6667	5.792	69.3707	174.495	82.5938	14.8333	0.611111	c.108.1.2	YihX-like	0.339056	Metabolism	Other enzymes	ABEV	high_disorder
DS.GH.4.6.2	GH	4	6	2	4.33333	16.6667	8.759	73.513	192.587	79.5513	25	0.696649	b.69.7.1	Prolyl oligopeptidase, N-terminal domain	0.339056	Intracellular_processes	Proteases, peptidases and their inhibitors	ABE	high_disorder
DS.EH.0.2.9	EH	0	2	9	3.66667	5.16667	4.14017	109.915	168.268	26.5827	8.83333	1	c.108.1.2	YihX-like	0.339056	Metabolism	Other enzymes	ABEV	high_disorder
DS.GH.2.1.28	GH	2	1	28	3.42857	17.1429	7.81343	97.0523	28.4536	56.5904	22.5714	0.340193	a.1.1.2	Globins	0.339056	Metabolism	Energy production and conversion	ABE	high_disorder
DS.BN.2.51.1	BN	2	51	1	9	7	4.50233	167.4	15.043	81.078	18	0.425926	e.5.1.1	Heme-dependent catalases	0.339056	Metabolism	Other enzymes	ABE	high_disorder
DS.HH.3.6.5	HH	3	6	5	5.375	11.875	7.68187	102.118	110.633	28.7905	20.25	0.367541	a.1.1.2	Globins	0.339056	Metabolism	Energy production and conversion	ABE	high_disorder
DS.HG.1.2.8	HG	1	2	8	14.1111	5.05556	5.28922	127.742	120.669	68.0674	20.1667	0.427226	a.1.1.2	Globins	0.339056	Metabolism	Energy production and conversion	ABE	high_disorder
DS.BK.6.45.1	BK	6	45	1	8.75	5.5	9.27425	145.259	79.1865	83.5155	20.25	0.333462	b.69.7.1	Prolyl oligopeptidase, N-terminal domain	0.339056	Intracellular_processes	Proteases, peptidases and their inhibitors	ABE	high_disorder
DS.BN.7.9.2	BN	7	9	2	7	2.66667	6.84467	130.606	335.704	132.279	16.6667	0.419118	b.69.7.1	Prolyl oligopeptidase, N-terminal domain	0.339056	Intracellular_processes	Proteases, peptidases and their inhibitors	ABE	high_disorder
DS.HG.1.2.2	HG	1	2	2	12.8158	4.92105	5.06355	122.252	102.013	71.8635	18.7368	0.57649	a.1.1.2	Globins	0.339056	Metabolism	Energy production and conversion	ABE	high_disorder
DS.HH.6.35.1	HH	6	35	1	4	10.75	12.5843	69.6388	338.482	99.149	20.75	0.761905	c.108.1.2	YihX-like	0.339056	Metabolism	Other enzymes	ABEV	high_disorder
DS.HE.5.110.1	HE	5	110	1	9.5	7.75	13.2	95.892	106.307	97.5395	22.25	0.540385	e.5.1.1	Heme-dependent catalases	0.339056	Metabolism	Other enzymes	ABE	high_disorder
DS.HE.2.13.4	HE	2	13	4	6.66667	4.5	7.3985	119.717	55.0265	78.5243	13.1667	0.791667	c.108.1.2	YihX-like	0.339056	Metabolism	Other enzymes	ABEV	high_disorder
DS.HG.3.1.6	HG	3	1	6	9.42857	3.14286	12.2361	52.6899	29.5199	122.996	15.5714	0.804172	c.108.1.2	YihX-like	0.339056	Metabolism	Other enzymes	ABEV	high_disorder
DS.EG.1.4.3	EG	1	4	3	5	3	6.59058	83.4681	265.348	15.0907	9	0.762821	c.124.1.5	IF2B-like	0.339056	Metabolism	Transferases	ABE	high_disorder
DS.EH.5.61.1	EH	5	61	1	5	11.8	14.8568	166.132	330.378	68.862	21.8	0.571223	c.37.1.4	Adenosine-5'phosphosulfate kinase (APS kinase)	0.339056	General	Small molecule binding	ABEV	high_disorder
DS.EH.2.1.44	EH	2	1	44	6.33333	11.4444	7.54389	142.558	143.707	48.3617	19.7778	0.444123	c.124.1.5	IF2B-like	0.339056	Metabolism	Transferases	ABE	high_disorder
DS.GH.0.1.11	GH	0	1	11	3	6.83133	3.34031	29.612	12.6856	83.266	9.83133	0.86596	c.124.1.5	IF2B-like	0.339056	Metabolism	Transferases	ABE	high_disorder
DS.HE.4.170.1	HE	4	170	1	8.5	5.75	13.1692	157.653	53.588	104.064	18.25	0.371861	c.124.1.5	IF2B-like	0.339056	Metabolism	Transferases	ABE	high_disorder
DS.HE.3.62.1	HE	3	62	1	13.6667	5.33333	6.37244	149.344	101.251	95.7811	22	0.430745	c.37.1.4	Adenosine-5'phosphosulfate kinase (APS kinase)	0.339056	General	Small molecule binding	ABEV	high_disorder
DS.GH.2.18.1	GH	2	18	1	3.83333	11	8.815	126.766	118.285	56.9282	16.8333	0.751918	c.37.1.17	Gluconate kinase	0.339056	General	Small molecule binding	ABEV	high_disorder
DS.HE.4.6.2	HE	4	6	2	12.45	4.3	10.4643	150.331	98.6816	115.329	20.75	0.423957	c.124.1.5	IF2B-like	0.339056	Metabolism	Transferases	ABE	high_disorder
DS.HH.1.1.87	HH	1	1	87	4	8	4.37514	41.7203	76.9214	111.395	13	0.613445	c.124.1.5	IF2B-like	0.339056	Metabolism	Transferases	ABE	high_disorder
DS.EH.8.31.1	EH	8	31	1	10	10	23.4963	82.377	353.681	71.378	28	0.369048	e.5.1.1	Heme-dependent catalases	0.339056	Metabolism	Other enzymes	ABE	high_disorder
DS.HE.4.174.1	HE	4	174	1	14	4.5	8.7455	158.243	141.71	110.062	22.5	0.189586	c.37.1.4	Adenosine-5'phosphosulfate kinase (APS kinase)	0.339056	General	Small molecule binding	ABEV	moderate_disorder
DS.HE.3.140.1	HE	3	140	1	13.6667	8.33333	5.91867	82.0387	185.181	85.3247	25	0.423559	d.118.1.1	N-acetylmuramoyl-L-alanine amidase-like	0.339056	Metabolism	Other enzymes	ABEV	high_disorder
DS.HE.3.52.3	HE	3	52	3	4	4	7.16	66.1947	21.437	21.3073	11	1	d.118.1.1	N-acetylmuramoyl-L-alanine amidase-like	0.339056	Metabolism	Other enzymes	ABEV	high_disorder
DS.EH.6.23.1	EH	6	23	1	5	6	10.2945	166.49	108.411	91.912	17	0.485294	c.42.1.2	Histone deacetylase, HDAC	0.339056	Metabolism	Amino acid transport and metabolism	ABEV	high_disorder
DS.GE.3.47.1	GE	3	47	1	3	6	7.8455	65.3067	94.6857	48.8558	12	1	c.42.1.2	Histone deacetylase, HDAC	0.339056	Metabolism	Amino acid transport and metabolism	ABEV	high_disorder
DS.GE.3.73.1	GE	3	73	1	3	7.66667	8.278	74.19	39.2507	61.6707	13.6667	0.833333	d.58.18.12	AF1403 N-terminal domain-like	0.339056	Metabolism	Amino acid transport and metabolism	ABE	high_disorder
DS.HH.5.4.2	HH	5	4	2	5	10.1429	10.6439	106.973	347.438	99.6079	20.1429	0.471358	c.42.1.2	Histone deacetylase, HDAC	0.339056	Metabolism	Amino acid transport and metabolism	ABEV	high_disorder
DS.EH.8.9.1	EH	8	9	1	6.5	11.25	9.213	139.77	168.385	105.492	25.75	0.236234	c.69.1.4	Prolyl oligopeptidase, C-terminal domain	0.339056	Metabolism	Other enzymes	ABE	moderate_disorder
DS.HG.5.2.2	HG	5	2	2	15.6	3	9.648	82.2918	15.3642	99.0316	23.6	0.487143	c.69.1.4	Prolyl oligopeptidase, C-terminal domain	0.339056	Metabolism	Other enzymes	ABE	high_disorder
DS.HH.5.94.1	HH	5	94	1	4	9.33333	12.4323	51	305.266	85.9863	18.3333	0.726522	c.69.1.4	Prolyl oligopeptidase, C-terminal domain	0.339056	Metabolism	Other enzymes	ABE	high_disorder
DS.HH.4.1.20	HH	4	1	20	15	11.8	10.6058	140.506	14.4368	112.797	30.8	0.350836	e.5.1.1	Heme-dependent catalases	0.339056	Metabolism	Other enzymes	ABE	high_disorder
DS.GH.8.4.1	GH	8	4	1	3	7	13.0317	82.6137	198.527	125.787	18	0.925926	d.118.1.1	N-acetylmuramoyl-L-alanine amidase-like	0.339056	Metabolism	Other enzymes	ABEV	high_disorder
DS.HE.14.1.1	HE	14	1	1	4	2.25	27.1483	110.758	163.89	40.839	20.25	0.652381	e.5.1.1	Heme-dependent catalases	0.339056	Metabolism	Other enzymes	ABE	high_disorder
DS.EG.4.14.1	EG	4	14	1	6	3	7.1588	72.4756	31.1326	50.5032	13	0.461538	b.6.1.1	Plastocyanin/azurin-like	0.343348	Intracellular_processes	Inorganic ion transport and metabolism	ABEV	high_disorder
DS.GH.2.8.4	GH	2	8	4	3	18.5	8.86875	141.303	5.344	108.184	23.5	0.561364	d.113.1.2	IPP isomerase-like	0.343348	Information	DNA replication, recombination, repair	ABEV	high_disorder
DS.EG.5.11.1	EG	5	11	1	3	3	9.3935	113.522	327.025	77.668	11	1	d.176.1.1	Oxidoreductase molybdopterin-binding domain	0.343348	Metabolism	Electron transfer/transport	ABE	high_disorder
DS.HH.1.2.17	HH	1	2	17	4.5	16.9	6.6709	126.381	169.31	98.2825	22.4	0.45634	d.96.1.1	GTP cyclohydrolase I	0.343348	Metabolism	Nucleotide transport and metabolism	ABEV	high_disorder
DS.EH.0.1.79	EH	0	1	79	8	8.33333	4.137	80.8827	233.044	14.792	16.3333	0.138528	d.96.1.1	GTP cyclohydrolase I	0.343348	Metabolism	Nucleotide transport and metabolism	ABEV	moderate_disorder
DS.BK.2.87.1	BK	2	87	1	4.66667	3.66667	8.46567	84.7357	72.3717	83.8757	10.3333	0.666667	e.3.1.3	Dac-like	0.343348	Metabolism	Other enzymes	ABE	high_disorder
DS.GE.2.12.2	GE	2	12	2	3.16667	6.66667	8.6255	106.189	122.869	122.989	11.8333	0.7	b.6.1.1	Plastocyanin/azurin-like	0.343348	Intracellular_processes	Inorganic ion transport and metabolism	ABEV	high_disorder
DS.EG.6.14.1	EG	6	14	1	6	3	7.29367	74.758	33.221	54.5983	15	0.155556	b.6.1.1	Plastocyanin/azurin-like	0.343348	Intracellular_processes	Inorganic ion transport and metabolism	ABEV	moderate_disorder
DS.BN.5.153.1	BN	5	153	1	8	7.33333	4.22833	118.178	9.752	80.2003	20.3333	0.441224	d.113.1.2	IPP isomerase-like	0.343348	Information	DNA replication, recombination, repair	ABEV	high_disorder
DS.HH.1.2.19	HH	1	2	19	4	12	6.81056	121.709	186.051	99.4586	17	0.741971	d.96.1.1	GTP cyclohydrolase I	0.343348	Metabolism	Nucleotide transport and metabolism	ABEV	high_disorder
DS.GG.1.3.4	GG	1	3	4	3	3	6.35825	155.436	147.256	83.068	7	1	d.96.1.1	GTP cyclohydrolase I	0.343348	Metabolism	Nucleotide transport and metabolism	ABEV	high_disorder
DS.HE.3.13.15	HE	3	13	15	9	6.66667	8.70333	102.596	101.16	39.041	18.6667	0.705556	c.108.1.5	Probable phosphatase YrbI	0.343348	Metabolism	Other enzymes	ABEV	high_disorder
DS.BK.5.89.1	BK	5	89	1	3.33333	3.33333	14.3023	94.0047	95.213	54.529	11.6667	0.666667	c.43.1.1	CAT-like	0.343348	Metabolism	Transferases	ABEV	high_disorder
DS.BK.3.72.1	BK	3	72	1	8	8	7.4695	122.741	63.6557	60.4008	19	0.171053	b.82.1.2	Germin/Seed storage 7S protein	0.343348	Metabolism	Nitrogen metabolism	ABEV	moderate_disorder
DS.BK.6.29.1	BK	6	29	1	8	3	13.0556	110.343	51.516	96.5804	17	0.494118	b.82.1.2	Germin/Seed storage 7S protein	0.343348	Metabolism	Nitrogen metabolism	ABEV	high_disorder
DS.BK.6.76.1	BK	6	76	1	9.33333	6	8.34633	152.077	57.5477	81.2347	21.3333	0.443995	b.82.1.2	Germin/Seed storage 7S protein	0.343348	Metabolism	Nitrogen metabolism	ABEV	high_disorder
DS.HG.2.10.4	HG	2	10	4	10.75	3.5	8.9215	125.677	59.618	52.8862	16.25	0.883333	d.16.1.1	GMC oxidoreductases	0.343348	Metabolism	Oxidation/Reduction	ABEV	high_disorder
DS.EH.6.77.1	EH	6	77	1	3.33333	18	16.6477	69.1747	287.336	13.131	27.3333	0.367284	d.16.1.1	GMC oxidoreductases	0.343348	Metabolism	Oxidation/Reduction	ABEV	high_disorder
DS.HE.4.195.1	HE	4	195	1	16.6667	4.33333	10.767	82.1187	18.3003	30.535	25	0.449074	d.159.1.3	Protein serine/threonine phosphatase	0.343348	Intracellular_processes	Proteases, peptidases and their inhibitors	ABEV	high_disorder
DS.GE.3.7.5	GE	3	7	5	3	4	10.5	129.537	40.773	114.508	10	1	d.159.1.3	Protein serine/threonine phosphatase	0.343348	Intracellular_processes	Proteases, peptidases and their inhibitors	ABEV	high_disorder
DS.EH.10.5.1	EH	10	5	1	3.5	13.25	16.8388	141.397	235.982	71.0637	26.75	0.133571	d.159.1.3	Protein serine/threonine phosphatase	0.343348	Intracellular_processes	Proteases, peptidases and their inhibitors	ABEV	moderate_disorder
DS.EH.1.2.11	EH	1	2	11	3.88	9.32	6.31828	84.8084	156.212	11.7155	14.2	0.748716	d.159.1.3	Protein serine/threonine phosphatase	0.343348	Intracellular_processes	Proteases, peptidases and their inhibitors	ABEV	high_disorder
DS.BK.4.19.2	BK	4	19	2	4.5	3.5	12.7137	71.4645	81.9617	48.8428	12	0.801961	b.70.2.1	C-terminal (heme d1) domain of cytochrome cd1-nitrite reductase	0.343348	Metabolism	Electron transfer/transport	ABEV	high_disorder
DS.BK.4.68.1	BK	4	68	1	5.6	6.8	10.2948	108.842	70.554	64.394	16.4	0.430033	b.70.2.1	C-terminal (heme d1) domain of cytochrome cd1-nitrite reductase	0.343348	Metabolism	Electron transfer/transport	ABEV	high_disorder
DS.BN.5.36.2	BN	5	36	2	5.66667	6	6.05967	155.855	330.266	65.2167	16.6667	0.745098	b.70.2.1	C-terminal (heme d1) domain of cytochrome cd1-nitrite reductase	0.343348	Metabolism	Electron transfer/transport	ABEV	high_disorder
DS.EG.0.1.39	EG	0	1	39	4.4	3	3.652	66.4736	276.986	37.7424	7.4	1	b.70.2.1	C-terminal (heme d1) domain of cytochrome cd1-nitrite reductase	0.343348	Metabolism	Electron transfer/transport	ABEV	high_disorder
DS.BN.2.4.12	BN	2	4	12	6.66667	8.66667	5.01927	124.703	330.488	106.51	17.3333	0.575797	d.108.1.6	LFTR-like	0.343348	Metabolism	Transferases	BE	high_disorder
DS.HE.3.4.23	HE	3	4	23	10	4.25	5.82775	81.0995	167.748	98.782	17.25	0.607441	d.108.1.6	LFTR-like	0.343348	Metabolism	Transferases	BE	high_disorder
DS.EG.9.9.1	EG	9	9	1	3	4	6.529	80.02	75.752	57.444	16	0.8125	b.82.1.2	Germin/Seed storage 7S protein	0.343348	Metabolism	Nitrogen metabolism	ABEV	high_disorder
DS.GH.2.1.25	GH	2	1	25	5.25	10.125	8.70937	130.372	80.1554	51.0116	17.375	0.60352	b.82.1.2	Germin/Seed storage 7S protein	0.343348	Metabolism	Nitrogen metabolism	ABEV	high_disorder
DS.HH.3.1.4	HH	3	1	4	15.9444	6.66667	11.3357	66.7061	10.8774	128.847	25.6111	0.322771	b.82.1.2	Germin/Seed storage 7S protein	0.343348	Metabolism	Nitrogen metabolism	ABEV	high_disorder
DS.EH.5.97.1	EH	5	97	1	7	12	12.5892	166.942	282.109	72.065	24	0.364954	c.108.1.5	Probable phosphatase YrbI	0.343348	Metabolism	Other enzymes	ABEV	high_disorder
DS.EH.8.8.1	EH	8	8	1	2	13.4	10.4788	127.571	6.5024	48.8468	23.4	0.41633	c.108.1.5	Probable phosphatase YrbI	0.343348	Metabolism	Other enzymes	ABEV	high_disorder
DS.BK.2.13.2	BK	2	13	2	3.75	5.25	8.35558	56.3647	69.9791	33.8019	11	0.803105	d.153.1.4	Proteasome subunits	0.343348	Metabolism	Other enzymes	ABEV	high_disorder
DS.HE.3.3.16	HE	3	3	16	12.75	5	6.48625	125.955	108.112	85.6435	20.75	0.604529	c.108.1.5	Probable phosphatase YrbI	0.343348	Metabolism	Other enzymes	ABEV	high_disorder
DS.EG.2.15.4	EG	2	15	4	3.5	3	6.5515	26.9767	350.748	35.7855	8.5	1	c.43.1.1	CAT-like	0.343348	Metabolism	Transferases	ABEV	high_disorder
DS.EH.5.7.3	EH	5	7	3	7.5	10.5	9.55175	155.292	16.6112	81.0935	23	0.330567	c.43.1.1	CAT-like	0.343348	Metabolism	Transferases	ABEV	high_disorder
DS.EG.5.20.1	EG	5	20	1	4	3	12.796	31.3923	106.067	26.8187	12	0.111111	d.159.1.3	Protein serine/threonine phosphatase	0.343348	Intracellular_processes	Proteases, peptidases and their inhibitors	ABEV	moderate_disorder
DS.HG.3.7.3	HG	3	7	3	7.25	3	8.54425	124.923	76.6672	18.484	13.25	0.763158	c.43.1.1	CAT-like	0.343348	Metabolism	Transferases	ABEV	high_disorder
DS.BN.2.42.3	BN	2	42	3	7.66667	7.66667	5.308	169.245	329.418	107.958	17.3333	0.44334	d.153.1.4	Proteasome subunits	0.343348	Metabolism	Other enzymes	ABEV	high_disorder
DS.BK.5.75.1	BK	5	75	1	4	4	15.4913	39.7927	50.7953	59.479	13	0.769231	d.153.1.4	Proteasome subunits	0.343348	Metabolism	Other enzymes	ABEV	high_disorder
DS.EH.3.16.2	EH	3	16	2	3.85714	11.7143	6.42186	149.398	53.8736	77.3326	18.5714	0.585426	d.153.1.4	Proteasome subunits	0.343348	Metabolism	Other enzymes	ABEV	high_disorder
DS.HH.6.16.1	HH	6	16	1	11.1429	15.8571	14.958	142.073	303.45	77.461	33	0.210992	d.153.1.4	Proteasome subunits	0.343348	Metabolism	Other enzymes	ABEV	moderate_disorder
DS.HH.5.35.1	HH	5	35	1	20.7143	11.4286	16.2806	122.223	333.299	128.015	37.1429	0.377271	d.153.1.4	Proteasome subunits	0.343348	Metabolism	Other enzymes	ABEV	high_disorder
DS.GH.2.1.16	GH	2	1	16	3	8.23529	9.50147	161.268	351.792	85.9986	13.2353	0.851923	a.60.8.3	RNase D C-terminal domains	0.343348	Information	DNA replication, recombination, repair	BE	high_disorder
DS.EH.5.96.1	EH	5	96	1	11.25	16.75	10.3242	151.971	17.7935	85.5572	33	0.174461	c.43.1.1	CAT-like	0.343348	Metabolism	Transferases	ABEV	moderate_disorder
DS.HG.2.4.5	HG	2	4	5	13.5	3	8.37183	124.525	52.5467	39.694	18.5	0.628676	a.60.8.3	RNase D C-terminal domains	0.343348	Information	DNA replication, recombination, repair	BE	high_disorder
DS.HH.5.40.1	HH	5	40	1	19.1667	13.5	15.753	123.569	329.066	126.142	37.6667	0.242235	d.153.1.4	Proteasome subunits	0.343348	Metabolism	Other enzymes	ABEV	moderate_disorder
DS.EG.2.14.3	EG	2	14	3	5.125	3	9.38162	81.118	318.481	18.9965	10.125	0.759615	b.40.6.2	BiMOP, duplicated molybdate-binding domain	0.343348	Other	Function unknown	ABE	high_disorder
DS.EG.1.3.2	EG	1	3	2	5.56757	3	6.61541	75.7782	320.498	26.1486	9.56757	0.880498	b.40.6.2	BiMOP, duplicated molybdate-binding domain	0.343348	Other	Function unknown	ABE	high_disorder
DS.BN.4.96.1	BN	4	96	1	10.75	5.5	5.77625	155.849	350.038	129.117	20.25	0.589474	b.40.6.2	BiMOP, duplicated molybdate-binding domain	0.343348	Other	Function unknown	ABE	high_disorder
DS.BN.4.124.1	BN	4	124	1	7.33333	6	7.911	164.125	307.788	49.004	17.3333	0.390693	b.40.6.2	BiMOP, duplicated molybdate-binding domain	0.343348	Other	Function unknown	ABE	high_disorder
DS.HH.6.45.1	HH	6	45	1	8	10	16.7	123.851	202.56	118.145	24	0.355882	d.159.1.3	Protein serine/threonine phosphatase	0.343348	Intracellular_processes	Proteases, peptidases and their inhibitors	ABEV	high_disorder
DS.HE.5.136.1	HE	5	136	1	11	4	14.368	38.8097	21.7427	26.227	20	0.05	d.159.1.3	Protein serine/threonine phosphatase	0.343348	Intracellular_processes	Proteases, peptidases and their inhibitors	ABEV	ordered
DS.HH.1.1.99	HH	1	1	99	7.4	8.4	4.9418	86.7374	98.9694	51.3396	16.8	0.806349	d.16.1.1	GMC oxidoreductases	0.343348	Metabolism	Oxidation/Reduction	ABEV	high_disorder
DS.BN.2.9.19	BN	2	9	19	7.33333	8.33333	4.80667	162.462	335.184	88.6167	17.6667	0.440476	d.153.1.4	Proteasome subunits	0.343348	Metabolism	Other enzymes	ABEV	high_disorder
DS.HH.5.37.1	HH	5	37	1	12	7.5	9.26625	99.2362	25.9178	106.641	24.5	0.508592	c.1.15.3	Xylose isomerase	0.347639	Metabolism	Carbohydrate transport and metabolism	ABE	high_disorder
DS.EG.0.1.31	EG	0	1	31	5.57143	3	3.25457	48.4599	277.04	32.4151	8.57143	1	c.36.1.7	Branched-chain alpha-keto acid dehydrogenase Pyr module	0.347639	General	Small molecule binding	ABEV	high_disorder
DS.HE.3.86.1	HE	3	86	1	14.5714	6.14286	10.8893	124.98	120.901	113.946	23.7143	0.349006	c.108.1.19	Histidinol phosphatase-like	0.347639	Metabolism	Other enzymes	ABEV	high_disorder
DS.HE.6.39.1	HE	6	39	1	17.75	5.25	15.2427	160.337	350.905	127.693	29	0.23453	c.108.1.19	Histidinol phosphatase-like	0.347639	Metabolism	Other enzymes	ABEV	moderate_disorder
DS.EH.2.1.56	EH	2	1	56	4.85714	8.42857	7.77086	162.277	102.188	68.3921	15.2857	0.680119	c.108.1.19	Histidinol phosphatase-like	0.347639	Metabolism	Other enzymes	ABEV	high_disorder
DS.EH.1.7.8	EH	1	7	8	4.14286	9	6.30529	54.4739	165.496	6.68057	14.1429	0.57439	c.108.1.19	Histidinol phosphatase-like	0.347639	Metabolism	Other enzymes	ABEV	high_disorder
DS.EG.3.69.1	EG	3	69	1	10.6667	3	11.5583	75.8513	335.168	29.128	16.6667	0.871795	c.108.1.19	Histidinol phosphatase-like	0.347639	Metabolism	Other enzymes	ABEV	high_disorder
DS.GE.3.17.3	GE	3	17	3	4	8	8.891	105.216	66.376	54.3043	15	0.333333	d.269.1.1	Gamma-glutamyl cyclotransferase-like	0.347639	Other	Function unknown	ABEV	high_disorder
DS.BN.2.51.3	BN	2	51	3	8	5.66667	4.40933	165.358	5.40533	82.158	15.6667	0.526144	d.269.1.1	Gamma-glutamyl cyclotransferase-like	0.347639	Other	Function unknown	ABEV	high_disorder
DS.HE.3.15.2	HE	3	15	2	12.0909	5.18182	7.65573	139.654	154.613	97.7231	20.2727	0.532232	c.36.1.7	Branched-chain alpha-keto acid dehydrogenase Pyr module	0.347639	General	Small molecule binding	ABEV	high_disorder
DS.HH.4.51.1	HH	4	51	1	18.6667	16	13.309	160.681	217.483	108.926	38.6667	0.240731	c.1.15.3	Xylose isomerase	0.347639	Metabolism	Carbohydrate transport and metabolism	ABE	moderate_disorder
DS.HE.4.177.1	HE	4	177	1	10.5	4.5	10.9985	171.689	248.026	118.959	19	0.508009	c.141.1.1	Glycerate kinase I	0.347639	Metabolism	Other enzymes	BEV	high_disorder
DS.EG.2.1.24	EG	2	1	24	3.83333	3.16667	7.53483	94.8568	15.284	40.5445	9	1	c.1.15.3	Xylose isomerase	0.347639	Metabolism	Carbohydrate transport and metabolism	ABE	high_disorder
DS.GE.1.9.3	GE	1	9	3	3	4.57143	6.70743	92.6483	83.4119	98.1004	8.57143	0.901099	b.35.1.1	GroES	0.347639	Intracellular_processes	Posttranslational modification, protein turnover, chaperones	ABEV	high_disorder
DS.HE.1.15.1	HE	1	15	1	8.58333	5.25	5.715	38.4933	150.557	33.8624	14.8333	0.798599	b.35.1.1	GroES	0.347639	Intracellular_processes	Posttranslational modification, protein turnover, chaperones	ABEV	high_disorder
DS.BN.9.9.1	BN	9	9	1	5	6.25	4.845	142.843	339.648	101.378	20.25	0.513092	b.82.2.10	AlkB-like	0.347639	Metabolism	Secondary metabolites biosynthesis, transport and catabolism	BEV	high_disorder
DS.EG.1.52.1	EG	1	52	1	4	5	4.82667	50.3193	101.878	30.3217	10	1	c.1.9.1	Adenosine/AMP deaminase	0.347639	Metabolism	Other enzymes	ABE	high_disorder
DS.EH.4.132.1	EH	4	132	1	3.33333	4	14.3113	75.3857	162.874	27.7063	11.3333	1	c.1.9.1	Adenosine/AMP deaminase	0.347639	Metabolism	Other enzymes	ABE	high_disorder
DS.GH.1.3.15	GH	1	3	15	5	13.6	5.8056	128.043	115.865	52.38	19.6	0.523611	c.1.9.1	Adenosine/AMP deaminase	0.347639	Metabolism	Other enzymes	ABE	high_disorder
DS.HE.4.96.1	HE	4	96	1	15	6.375	8.46187	103.344	153.158	69.6846	25.375	0.258507	c.1.9.1	Adenosine/AMP deaminase	0.347639	Metabolism	Other enzymes	ABE	moderate_disorder
DS.HG.0.1.111	HG	0	1	111	10.3333	3	2.446	19.8183	310.976	52.2353	13.3333	0.704545	c.1.9.1	Adenosine/AMP deaminase	0.347639	Metabolism	Other enzymes	ABE	high_disorder
DS.HH.4.6.13	HH	4	6	13	8.5	5	11.102	140.637	348.031	40.313	17.5	0.884615	c.87.1.7	ADP-heptose LPS heptosyltransferase II	0.347639	Metabolism	Polysaccharide metabolism	ABEV	high_disorder
DS.HE.5.80.1	HE	5	80	1	8.4	8.4	9.1118	143.05	150.442	53.8516	21.8	0.438408	c.87.1.7	ADP-heptose LPS heptosyltransferase II	0.347639	Metabolism	Polysaccharide metabolism	ABEV	high_disorder
DS.HE.4.197.1	HE	4	197	1	16.6667	5	10.919	163.075	30.7817	117.416	25.6667	0.357312	c.87.1.7	ADP-heptose LPS heptosyltransferase II	0.347639	Metabolism	Polysaccharide metabolism	ABEV	high_disorder
DS.HE.3.16.8	HE	3	16	8	7.75	5	6.95575	120.448	102.106	33.9868	15.75	0.383333	c.87.1.7	ADP-heptose LPS heptosyltransferase II	0.347639	Metabolism	Polysaccharide metabolism	ABEV	high_disorder
DS.HH.3.15.8	HH	3	15	8	12.6667	6.66667	8.32533	22.7913	355.055	29.214	22.3333	0.505051	c.1.9.1	Adenosine/AMP deaminase	0.347639	Metabolism	Other enzymes	ABE	high_disorder
DS.EH.4.6.5	EH	4	6	5	4	12.25	12.973	157.196	27.1002	39.0403	20.25	0.417446	c.87.1.7	ADP-heptose LPS heptosyltransferase II	0.347639	Metabolism	Polysaccharide metabolism	ABEV	high_disorder
DS.EH.1.15.2	EH	1	15	2	5.6	10.8	6.6302	95.138	28.391	50.4106	17.4	0.58013	c.77.1.3	PdxA-like	0.347639	Metabolism	Oxidation/Reduction	ABE	high_disorder
DS.EH.1.2.31	EH	1	2	31	4.25	5.125	6.882	102.858	6.11963	24.3674	10.375	0.75	c.77.1.3	PdxA-like	0.347639	Metabolism	Oxidation/Reduction	ABE	high_disorder
DS.EH.7.44.1	EH	7	44	1	4.66667	9	8.66033	142.093	95.2063	41.5117	20.6667	0.487302	c.77.1.3	PdxA-like	0.347639	Metabolism	Oxidation/Reduction	ABE	high_disorder
DS.GH.3.1.7	GH	3	1	7	3.16667	14.5	10.8547	162.566	330.746	81.6428	20.6667	0.671768	c.1.15.3	Xylose isomerase	0.347639	Metabolism	Carbohydrate transport and metabolism	ABE	high_disorder
DS.HH.13.3.1	HH	13	3	1	26	9.5	23.5005	115.565	9.76125	152.95	48.5	0.24772	c.36.1.11	Branched-chain alpha-keto acid dehydrogenase PP module	0.347639	General	Small molecule binding	ABEV	moderate_disorder
DS.EH.1.5.32	EH	1	5	32	5.33333	4	5.00633	35.498	171.18	41.004	10.3333	0.025641	c.141.1.1	Glycerate kinase I	0.347639	Metabolism	Other enzymes	BEV	ordered
DS.EG.0.3.7	EG	0	3	7	4.66667	5	3.786	108.919	175.852	12.1337	9.66667	1	c.36.1.11	Branched-chain alpha-keto acid dehydrogenase PP module	0.347639	General	Small molecule binding	ABEV	high_disorder
DS.EG.5.4.1	EG	5	4	1	6	3	14.7256	145.796	9.04	53.5397	14	0.651361	c.1.6.2	"Hypothetical" protein ybl036c	0.347639	Metabolism	Amino acid transport and metabolism	ABE	high_disorder
DS.HE.5.138.1	HE	5	138	1	11.6667	4	11.3387	164.431	58.4973	88.3553	20.6667	0.568519	c.36.1.11	Branched-chain alpha-keto acid dehydrogenase PP module	0.347639	General	Small molecule binding	ABEV	high_disorder
DS.HE.3.11.8	HE	3	11	8	11	6	11.7658	156.244	186.671	123.788	20	0.141388	c.36.1.11	Branched-chain alpha-keto acid dehydrogenase PP module	0.347639	General	Small molecule binding	ABEV	moderate_disorder
DS.HE.3.18.9	HE	3	18	9	13.3333	7.33333	10.847	154.92	171.958	115.256	23.6667	0.125604	c.36.1.11	Branched-chain alpha-keto acid dehydrogenase PP module	0.347639	General	Small molecule binding	ABEV	moderate_disorder
DS.BN.2.3.25	BN	2	3	25	5.71429	5.85714	4.73329	153.792	343.151	94.5043	13.5714	0.671586	b.40.7.1	CheW-like	0.347639	Regulation	Signal transduction	ABE	high_disorder
DS.HE.5.122.1	HE	5	122	1	11.75	4.25	11.203	165.279	54.6395	94.3508	21	0.4093	c.36.1.11	Branched-chain alpha-keto acid dehydrogenase PP module	0.347639	General	Small molecule binding	ABEV	high_disorder
DS.EH.5.55.1	EH	5	55	1	4	15.8	15.0352	111.959	120.059	36.4572	24.8	0.225533	b.82.2.9	PhyH-like	0.347639	Metabolism	Secondary metabolites biosynthesis, transport and catabolism	ABEV	moderate_disorder
DS.GG.1.2.11	GG	1	2	11	3	3	4.368	41.4047	350.865	71.3642	7	1	c.36.1.11	Branched-chain alpha-keto acid dehydrogenase PP module	0.347639	General	Small molecule binding	ABEV	high_disorder
DS.GH.0.1.116	GH	0	1	116	4.75	10.5	3.644	66.0445	4.98875	39.0408	15.25	0.769318	c.36.1.11	Branched-chain alpha-keto acid dehydrogenase PP module	0.347639	General	Small molecule binding	ABEV	high_disorder
DS.HE.3.2.7	HE	3	2	7	12.6	3.8	10.4986	164.595	60.4141	111.767	19.4	0.467094	c.1.6.2	"Hypothetical" protein ybl036c	0.347639	Metabolism	Amino acid transport and metabolism	ABE	high_disorder
DS.HG.4.4.1	HG	4	4	1	14	3	9.67845	97.6223	28.3001	111.446	21	0.645418	d.58.49.1	YajQ-like	0.347639	Other	Function unknown	B	high_disorder
DS.EH.2.1.31	EH	2	1	31	6.73333	13.9333	7.63993	144.404	354.92	71.0503	22.6667	0.324503	d.58.49.1	YajQ-like	0.347639	Other	Function unknown	B	high_disorder
DS.BN.2.2.64	BN	2	2	64	6.2	3.8	4.6112	165.918	355.993	88.3928	12	1	d.58.49.1	YajQ-like	0.347639	Other	Function unknown	B	high_disorder
DS.BK.5.33.1	BK	5	33	1	4.6	5.2	8.8026	144.998	73.3052	85.5426	14.8	0.740523	b.82.2.9	PhyH-like	0.347639	Metabolism	Secondary metabolites biosynthesis, transport and catabolism	ABEV	high_disorder
DS.HE.2.18.1	HE	2	18	1	4.3	5.8	5.3989	34.7123	18.7611	20.0646	12.1	0.799167	c.51.4.2	Maf-like	0.347639	Other	Function unknown	ABE	high_disorder
DS.BN.2.35.1	BN	2	35	1	6	4.4	5.3056	155.642	334.627	115.582	12.4	0.941176	c.66.1.8	Chemotaxis receptor methyltransferase CheR, C-terminal domain	0.351931	Metabolism	Transferases	ABEV	high_disorder
DS.HG.4.31.1	HG	4	31	1	7.5	3	10.4352	80.8102	348.695	58.303	14.5	0.842105	d.58.29.1	Adenylyl and guanylyl cyclase catalytic domain	0.351931	Regulation	Signal transduction	ABEV	high_disorder
DS.EH.1.1.33	EH	1	1	33	5.44444	7.16667	7.00883	127.557	32.0285	37.7978	13.6111	0.734535	d.45.1.1	Ribosomal protein L7/12, C-terminal domain	0.351931	Information	Translation, ribosomes, ribosome biogenesis; tRNA metabolism	BEV	high_disorder
DS.HE.6.120.1	HE	6	120	1	11	3.66667	8.36733	145.319	4.37233	69.3947	20.6667	0.85	d.58.29.1	Adenylyl and guanylyl cyclase catalytic domain	0.351931	Regulation	Signal transduction	ABEV	high_disorder
DS.GG.1.1.8	GG	1	1	8	4.2	3	6.4368	107.88	200.533	51.153	8.2	1	d.58.29.1	Adenylyl and guanylyl cyclase catalytic domain	0.351931	Regulation	Signal transduction	ABEV	high_disorder
DS.HE.5.10.3	HE	5	10	3	11.2	3.6	13.5062	139.553	74.429	115.638	19.8	0.452515	d.116.1.1	YbaK/ProRS associated domain	0.351931	Other	Function unknown	ABE	high_disorder
DS.BN.4.148.1	BN	4	148	1	6	6.66667	5.08833	157.529	334.622	96.116	16.6667	0.295833	b.68.9.1	NHL repeat	0.351931	Metabolism	Other enzymes	ABEV	moderate_disorder
DS.EG.0.1.37	EG	0	1	37	4.83333	5	3.18917	98.3763	85.9385	9.836	9.83333	1	c.66.1.8	Chemotaxis receptor methyltransferase CheR, C-terminal domain	0.351931	Metabolism	Transferases	ABEV	high_disorder
DS.EH.2.81.1	EH	2	81	1	8	5	6.58567	36.686	17.763	51.6597	15	0.381536	d.58.29.1	Adenylyl and guanylyl cyclase catalytic domain	0.351931	Regulation	Signal transduction	ABEV	high_disorder
DS.HE.4.91.1	HE	4	91	1	12.3333	4.66667	8.65983	109.754	160.622	83.1842	21	0.231057	c.1.9.10	N-acetylglucosamine-6-phosphate deacetylase, NagA, catalytic domain	0.351931	Metabolism	Other enzymes	ABE	moderate_disorder
DS.BN.4.48.1	BN	4	48	1	5.8	4.6	6.691	160.447	291.931	138.962	14.4	0.452273	d.153.1.5	(Glycosyl)asparaginase	0.351931	Metabolism	Other enzymes	ABE	high_disorder
DS.EH.6.86.1	EH	6	86	1	7.33333	8	14.834	158.456	290.214	122.863	21.3333	0.388167	d.116.1.1	YbaK/ProRS associated domain	0.351931	Other	Function unknown	ABE	high_disorder
DS.HH.1.1.122	HH	1	1	122	4	6	5.154	105.755	77.4852	96.0987	11	1	d.129.3.3	Ring hydroxylating alpha subunit catalytic domain	0.351931	General	General or several functions	ABEV	high_disorder
DS.HE.4.10.15	HE	4	10	15	6.25	6	9.44825	98.3113	57.6	24.3648	16.25	0.65625	d.129.3.3	Ring hydroxylating alpha subunit catalytic domain	0.351931	General	General or several functions	ABEV	high_disorder
DS.HE.2.25.6	HE	2	25	6	10	5	6.74733	59.6983	159.054	45.7483	17	0.511111	d.129.3.3	Ring hydroxylating alpha subunit catalytic domain	0.351931	General	General or several functions	ABEV	high_disorder
DS.EH.4.126.1	EH	4	126	1	9.66667	9	10.7143	108.721	49.4413	66.5603	22.6667	0.393333	d.129.3.3	Ring hydroxylating alpha subunit catalytic domain	0.351931	General	General or several functions	ABEV	high_disorder
DS.EH.2.74.1	EH	2	74	1	9.66667	7.33333	8.48367	102.842	20.4097	72.644	19	0.648148	d.129.3.3	Ring hydroxylating alpha subunit catalytic domain	0.351931	General	General or several functions	ABEV	high_disorder
DS.EG.3.2.4	EG	3	2	4	5	3.5	12.6355	109.801	49.6455	18.7218	11.5	0.791667	b.68.9.1	NHL repeat	0.351931	Metabolism	Other enzymes	ABEV	high_disorder
DS.HE.3.157.1	HE	3	157	1	8.66667	7	8.34967	72.315	37.4007	34.1817	18.6667	0.462302	b.1.8.1	Cu,Zn superoxide dismutase-like	0.351931	Metabolism	Oxidation/Reduction	ABEV	high_disorder
DS.BN.3.79.1	BN	3	79	1	4.75	6.5	4.88125	157.783	346.13	99.1118	14.25	0.676923	d.129.3.3	Ring hydroxylating alpha subunit catalytic domain	0.351931	General	General or several functions	ABEV	high_disorder
DS.HE.4.37.3	HE	4	37	3	11.5714	5.28571	10.4333	159.692	39.4071	92.4641	20.8571	0.339587	c.66.1.1	COMT-like	0.351931	Metabolism	Transferases	ABEV	high_disorder
DS.BN.3.40.1	BN	3	40	1	6.1	4.8	4.8437	156.631	340.447	96.484	13.9	0.493304	d.129.3.3	Ring hydroxylating alpha subunit catalytic domain	0.351931	General	General or several functions	ABEV	high_disorder
DS.HH.3.21.1	HH	3	21	1	10.6667	12.1429	12.4204	124.995	339.184	112.933	25.8095	0.401979	c.1.9.10	N-acetylglucosamine-6-phosphate deacetylase, NagA, catalytic domain	0.351931	Metabolism	Other enzymes	ABE	high_disorder
DS.HH.1.6.1	HH	1	6	1	8.64286	6.42857	4.15793	36.7218	121.018	84.1521	16.0714	0.607919	c.1.9.10	N-acetylglucosamine-6-phosphate deacetylase, NagA, catalytic domain	0.351931	Metabolism	Other enzymes	ABE	high_disorder
DS.HG.1.4.4	HG	1	4	4	9.75	3	7.01175	72.8175	348.06	84.7493	13.75	1	c.1.9.10	N-acetylglucosamine-6-phosphate deacetylase, NagA, catalytic domain	0.351931	Metabolism	Other enzymes	ABE	high_disorder
DS.BN.7.88.1	BN	7	88	1	5.33333	5.66667	4.93567	171.346	347.956	96.6923	18	0.399415	d.129.3.3	Ring hydroxylating alpha subunit catalytic domain	0.351931	General	General or several functions	ABEV	high_disorder
DS.EH.1.4.24	EH	1	4	24	4.75	8	4.5405	85.5708	151.668	37.3417	13.75	0.517857	d.58.29.1	Adenylyl and guanylyl cyclase catalytic domain	0.351931	Regulation	Signal transduction	ABEV	high_disorder
DS.HE.3.5.13	HE	3	5	13	10.7143	4.85714	9.70871	124.458	28.6157	127.898	18.5714	0.523881	d.116.1.1	YbaK/ProRS associated domain	0.351931	Other	Function unknown	ABE	high_disorder
DS.HE.5.31.1	HE	5	31	1	13.6	5.4	13.1066	166.797	289.007	129.76	24	0.297371	d.153.1.5	(Glycosyl)asparaginase	0.351931	Metabolism	Other enzymes	ABE	moderate_disorder
DS.BK.5.100.1	BK	5	100	1	6.33333	4.33333	10.8283	127.143	78.9133	57.7083	15.6667	0.615205	b.92.1.5	N-acetylglucosamine-6-phosphate deacetylase, NagA	0.351931	Metabolism	Other enzymes	ABE	high_disorder
DS.BN.2.1.11	BN	2	1	11	6.45	6.675	4.79733	150.311	338.659	101.2	15.125	0.546603	b.33.1.2	Ring hydroxylating alpha subunit ISP domain	0.351931	Metabolism	Electron transfer/transport	ABEV	high_disorder
DS.EH.1.27.2	EH	1	27	2	10.3333	8	5.23033	55.9773	38.0547	63.139	19.3333	0.400463	d.58.29.1	Adenylyl and guanylyl cyclase catalytic domain	0.351931	Regulation	Signal transduction	ABEV	high_disorder
DS.HG.1.13.1	HG	1	13	1	17	3	6.33875	58.1823	164.703	99.6925	21	0.491959	d.153.1.5	(Glycosyl)asparaginase	0.351931	Metabolism	Other enzymes	ABE	high_disorder
DS.HE.3.97.1	HE	3	97	1	14	5.33333	7.87267	139.202	22.1103	95.5947	22.3333	0.517598	c.1.15.4	IolI-like	0.351931	Metabolism	Carbohydrate transport and metabolism	ABE	high_disorder
DS.HE.4.172.1	HE	4	172	1	12	4.75	9.494	167.522	240.268	110.264	20.75	0.378873	c.1.15.4	IolI-like	0.351931	Metabolism	Carbohydrate transport and metabolism	ABE	high_disorder
DS.HG.2.10.2	HG	2	10	2	8.75	3	9.41975	95.42	24.5613	54.2895	13.75	1	c.1.15.4	IolI-like	0.351931	Metabolism	Carbohydrate transport and metabolism	ABE	high_disorder
DS.BN.2.1.57	BN	2	1	57	5.92857	6.35714	4.86836	139.831	334.896	104.209	14.2857	0.517994	b.92.1.5	N-acetylglucosamine-6-phosphate deacetylase, NagA	0.351931	Metabolism	Other enzymes	ABE	high_disorder
DS.HG.0.1.159	HG	0	1	159	4	3	3.38733	6.32033	228.851	97.8287	7	1	d.153.1.5	(Glycosyl)asparaginase	0.351931	Metabolism	Other enzymes	ABE	high_disorder
DS.HE.6.118.1	HE	6	118	1	10	5	12.4093	84.607	131.593	65.2687	21	0.142857	b.33.1.2	Ring hydroxylating alpha subunit ISP domain	0.351931	Metabolism	Electron transfer/transport	ABEV	moderate_disorder
DS.BN.2.2.67	BN	2	2	67	8.2	5	4.562	166.051	16.3844	88.1874	15.2	0.553297	d.58.29.1	Adenylyl and guanylyl cyclase catalytic domain	0.351931	Regulation	Signal transduction	ABEV	high_disorder
DS.BN.5.149.1	BN	5	149	1	12.3333	6.66667	4.90333	148.088	338.218	101.707	24	0.235145	d.58.29.1	Adenylyl and guanylyl cyclase catalytic domain	0.351931	Regulation	Signal transduction	ABEV	moderate_disorder
DS.HH.4.4.9	HH	4	4	9	9	10.25	9.55675	111.761	23.8278	86.6395	23.25	0.432065	c.1.15.4	IolI-like	0.351931	Metabolism	Carbohydrate transport and metabolism	ABE	high_disorder
DS.GH.2.9.1	GH	2	9	1	3.75	11	7.655	55.3955	198.516	75.2725	16.75	0.584704	b.33.1.2	Ring hydroxylating alpha subunit ISP domain	0.351931	Metabolism	Electron transfer/transport	ABEV	high_disorder
DS.BN.5.12.1	BN	5	12	1	6.84848	6.0303	6.23361	139.273	343.101	138.662	17.8788	0.403162	b.117.1.1	Obg GTP-binding protein N-terminal domain	0.351931	General	Small molecule binding	BE	high_disorder
DS.HH.4.1.19	HH	4	1	19	17.4	14.4	9.6992	152.622	312.077	98.6548	35.8	0.257867	d.153.1.5	(Glycosyl)asparaginase	0.351931	Metabolism	Other enzymes	ABE	moderate_disorder
DS.HH.2.3.32	HH	2	3	32	6	11.6667	7.926	119.519	103.651	48.4797	19.6667	0.731183	a.211.1.3	modified HD domain	0.351931	Metabolism	Other enzymes	BE	high_disorder
DS.HH.4.55.1	HH	4	55	1	8.83333	14.6667	14.3983	128.509	222.583	130.681	27.5	0.180121	a.100.1.6	Glycerol-3-phosphate dehydrogenase	0.356223	Metabolism	Energy production and conversion	ABE	moderate_disorder
DS.GG.1.2.10	GG	1	2	10	3	3	5.425	81.2747	33.7888	97.8937	7	1	c.66.1.26	C5 cytosine-specific DNA methylase, DCM	0.356223	Metabolism	Transferases	ABEV	high_disorder
DS.BN.5.125.1	BN	5	125	1	6.66667	7.33333	4.67967	149.889	346.146	99.6773	19	0.425408	d.32.1.3	Extradiol dioxygenases	0.356223	Metabolism	Oxidation/Reduction	ABE	high_disorder
DS.EG.3.8.2	EG	3	8	2	4.4	3	10.6838	65.6994	352.467	54.4596	10.4	1	c.66.1.26	C5 cytosine-specific DNA methylase, DCM	0.356223	Metabolism	Transferases	ABEV	high_disorder
DS.BN.3.8.5	BN	3	8	5	6.8	6.6	4.9168	175.092	215.169	94.562	16.4	0.715	f.4.3.1	Porin	0.356223	Intracellular_processes	Transport	BEV	high_disorder
DS.HH.2.1.104	HH	2	1	104	9	14	6.20133	20.8683	95.6317	29.869	25	0.331218	d.129.3.5	AHSA1 domain	0.356223	General	General or several functions	ABEV	high_disorder
DS.HG.3.12.2	HG	3	12	2	10.6	4	12.4416	86.1918	354.949	119.11	17.6	0.765686	c.56.3.1	Peptidyl-tRNA hydrolase-like	0.356223	Information	Translation, ribosomes, ribosome biogenesis; tRNA metabolism	BE	high_disorder
DS.BN.7.19.1	BN	7	19	1	5.77778	4.44444	6.34511	161.48	347.179	128.419	17.2222	0.324851	d.32.1.3	Extradiol dioxygenases	0.356223	Metabolism	Oxidation/Reduction	ABE	high_disorder
DS.BK.3.8.2	BK	3	8	2	3.57143	4.78571	11.7203	50.6809	85.9656	24.3121	11.3571	0.903509	d.252.1.1	CheC-like	0.356223	Other	Function unknown	ABE	high_disorder
DS.EH.1.3.21	EH	1	3	21	3.5	10.75	5.7095	63.1448	309.565	25.5745	15.25	0.392857	f.4.3.1	Porin	0.356223	Intracellular_processes	Transport	BEV	high_disorder
DS.EH.3.4.17	EH	3	4	17	5.33333	11.6667	10.6213	119.756	356.099	41.3347	20	0.489693	d.32.1.3	Extradiol dioxygenases	0.356223	Metabolism	Oxidation/Reduction	ABE	high_disorder
DS.HE.4.25.1	HE	4	25	1	10.5926	5.03704	7.0077	121.751	103.904	81.8897	19.6296	0.369041	d.32.1.3	Extradiol dioxygenases	0.356223	Metabolism	Oxidation/Reduction	ABE	high_disorder
DS.GE.5.23.1	GE	5	23	1	3	4.66667	15.594	123.749	349.48	100.891	12.6667	0.694444	c.66.1.26	C5 cytosine-specific DNA methylase, DCM	0.356223	Metabolism	Transferases	ABEV	high_disorder
DS.BN.2.1.77	BN	2	1	77	7	6.71429	4.65614	141.628	338.267	92.0949	15.7143	0.732323	b.139.1.1	Surface presentation of antigens (SPOA)	0.356223	Intracellular_processes	Transport	BE	high_disorder
DS.BN.2.23.4	BN	2	23	4	9.2	7.8	5.114	154.997	349.047	113.485	19	0.712811	f.4.3.1	Porin	0.356223	Intracellular_processes	Transport	BEV	high_disorder
DS.HE.3.13.14	HE	3	13	14	5.75	5.75	7.11475	128.981	115.834	74.44	14.5	0.686508	c.44.1.1	Low-molecular-weight phosphotyrosine protein phosphatases	0.356223	Regulation	Kinases and phosphatases and inhibitors	ABE	high_disorder
DS.BK.6.74.1	BK	6	74	1	7	8	11.3303	169.978	327.543	29.489	21	0.259968	f.4.3.1	Porin	0.356223	Intracellular_processes	Transport	BEV	moderate_disorder
DS.EG.2.19.3	EG	2	19	3	4.8	3	7.1612	28.348	304.217	24.4752	9.8	1	c.23.5.3	Quinone reductase	0.356223	Metabolism	Oxidation/Reduction	ABE	high_disorder
DS.GE.2.21.1	GE	2	21	1	3.14286	4.71429	8.69343	159.428	32.6277	128.695	9.85714	0.857143	c.23.5.3	Quinone reductase	0.356223	Metabolism	Oxidation/Reduction	ABE	high_disorder
DS.HE.3.105.1	HE	3	105	1	8.8	6.6	6.2872	111.001	162.239	51.1524	18.4	0.297011	d.41.1.1	CO dehydrogenase molybdoprotein N-domain-like	0.356223	Metabolism	Electron transfer/transport	ABE	moderate_disorder
DS.EH.1.6.11	EH	1	6	11	4.4	9.2	5.6348	22.69	288.217	14.6482	14.6	0.813131	d.41.1.1	CO dehydrogenase molybdoprotein N-domain-like	0.356223	Metabolism	Electron transfer/transport	ABE	high_disorder
DS.BN.2.11.27	BN	2	11	27	10.6667	7.66667	5.119	175.23	331.15	113.52	20.3333	0.210956	f.4.3.1	Porin	0.356223	Intracellular_processes	Transport	BEV	moderate_disorder
DS.BK.5.93.1	BK	5	93	1	2	7	8.413	165.124	123.311	82.9737	14	0.0238095	d.41.1.1	CO dehydrogenase molybdoprotein N-domain-like	0.356223	Metabolism	Electron transfer/transport	ABE	ordered
DS.EG.0.2.24	EG	0	2	24	5.14286	4	3.23371	68.2007	307.072	6.25529	9.14286	1	c.44.1.1	Low-molecular-weight phosphotyrosine protein phosphatases	0.356223	Regulation	Kinases and phosphatases and inhibitors	ABE	high_disorder
DS.HE.2.2.5	HE	2	2	5	10.2286	5.28571	7.41371	123.505	100.053	61.9343	17.5143	0.498907	c.23.5.3	Quinone reductase	0.356223	Metabolism	Oxidation/Reduction	ABE	high_disorder
DS.HH.1.3.36	HH	1	3	36	12.6667	6.66667	6.41533	104.343	209.465	56.3243	20.3333	0.372405	d.129.3.5	AHSA1 domain	0.356223	General	General or several functions	ABEV	high_disorder
DS.HG.2.1.48	HG	2	1	48	6	3	5.286	110.488	117.794	54.1753	11	1	d.129.3.5	AHSA1 domain	0.356223	General	General or several functions	ABEV	high_disorder
DS.EH.3.10.2	EH	3	10	2	8.14286	9	9.83386	112.391	10.1269	67.6206	20.1429	0.339039	d.129.3.5	AHSA1 domain	0.356223	General	General or several functions	ABEV	high_disorder
DS.BN.2.13.13	BN	2	13	13	7.66667	7	4.44067	169.739	19.49	93.888	16.6667	0.783333	d.110.6.1	Sensory domain of two-component sensor kinase	0.356223	General	Small molecule binding	AB	high_disorder
DS.EG.3.78.1	EG	3	78	1	4.33333	3.66667	8.766	152.082	9.19467	55.9097	11	1	d.110.6.1	Sensory domain of two-component sensor kinase	0.356223	General	Small molecule binding	AB	high_disorder
DS.EG.0.8.3	EG	0	8	3	6.33333	3	3.97933	119.436	107.289	12.895	9.33333	1	d.129.3.5	AHSA1 domain	0.356223	General	General or several functions	ABEV	high_disorder
DS.BN.2.14.11	BN	2	14	11	7	6	5.21033	163.341	335.225	106.12	15	0.740741	d.32.1.3	Extradiol dioxygenases	0.356223	Metabolism	Oxidation/Reduction	ABE	high_disorder
DS.BN.2.2.81	BN	2	2	81	9	11	4.9195	174.518	196.972	95.793	22	0.448817	f.4.3.1	Porin	0.356223	Intracellular_processes	Transport	BEV	high_disorder
DS.BN.2.43.1	BN	2	43	1	4.25	4.25	4.90525	160.809	332.877	110.944	10.5	1	d.145.1.3	CO dehydrogenase flavoprotein N-terminal domain-like	0.356223	General	Small molecule binding	ABE	high_disorder
DS.EG.1.42.1	EG	1	42	1	3.25	3	6.454	107.042	339.825	18.6335	7.25	1	c.1.9.15	PP1699/LP2961-like	0.356223	Metabolism	Other enzymes	ABE	high_disorder
DS.EH.8.27.1	EH	8	27	1	3.66667	13.6667	16.7287	154.945	328.702	37.7777	25.3333	0.555897	c.1.12.5	HpcH/HpaI aldolase	0.356223	Metabolism	Energy production and conversion	ABEV	high_disorder
DS.BN.3.52.1	BN	3	52	1	8.14286	8.28571	5.75986	166.373	329.522	67.025	19.4286	0.440484	d.74.2.1	C-terminal domain of arginine repressor	0.356223	Regulation	DNA-binding (transcription factors)	B	high_disorder
DS.BN.6.121.1	BN	6	121	1	9.66667	2	6.63867	149.095	346.701	132.378	17.6667	0.489107	d.87.2.1	CO dehydrogenase flavoprotein C-terminal domain-like	0.356223	Metabolism	Other enzymes	ABE	high_disorder
DS.HG.2.1.3	HG	2	1	3	8.42857	3.28571	5.13114	33.3603	346.325	32.5593	13.7143	0.713004	c.23.5.3	Quinone reductase	0.356223	Metabolism	Oxidation/Reduction	ABE	high_disorder
DS.HE.6.116.1	HE	6	116	1	10	2.33333	10.3553	58.7353	148.83	49.961	18.3333	0.166667	c.23.5.3	Quinone reductase	0.356223	Metabolism	Oxidation/Reduction	ABE	moderate_disorder
DS.HE.4.11.6	HE	4	11	6	15.8333	5.66667	10.514	171.487	128.332	119.378	25.5	0.609159	c.23.5.3	Quinone reductase	0.356223	Metabolism	Oxidation/Reduction	ABE	high_disorder
DS.BK.12.5.1	BK	12	5	1	5.5	5.5	17.1047	96.5948	238.757	137.007	23	0.470238	b.80.8.1	Pentapeptide repeats	0.356223	Other	Function unknown	ABEV	high_disorder
DS.BK.2.25.1	BK	2	25	1	4.375	3.75	8.2345	98.1025	97.9949	78.9848	10.125	0.9375	b.80.8.1	Pentapeptide repeats	0.356223	Other	Function unknown	ABEV	high_disorder
DS.HE.4.27.5	HE	4	27	5	8	5	7.38167	105.388	129.253	30.4217	17	0.313313	c.1.12.5	HpcH/HpaI aldolase	0.356223	Metabolism	Energy production and conversion	ABEV	high_disorder
DS.BN.6.70.1	BN	6	70	1	6	6.6	5.654	167.773	205.37	64.7	18.6	0.750239	d.129.3.5	AHSA1 domain	0.356223	General	General or several functions	ABEV	high_disorder
DS.HH.2.10.6	HH	2	10	6	6	7.5	6.844	121.147	81.6628	85.56	15.5	0.525397	d.145.1.3	CO dehydrogenase flavoprotein N-terminal domain-like	0.356223	General	Small molecule binding	ABE	high_disorder
DS.HG.0.2.15	HG	0	2	15	11.4	3	3.7884	73.7232	22.559	84.1364	14.4	0.836316	d.145.1.3	CO dehydrogenase flavoprotein N-terminal domain-like	0.356223	General	Small molecule binding	ABE	high_disorder
DS.HE.3.10.3	HE	3	10	3	6.16667	4.75	9.54617	122.767	96.482	100.425	13.9167	0.374859	d.145.1.3	CO dehydrogenase flavoprotein N-terminal domain-like	0.356223	General	Small molecule binding	ABE	high_disorder
DS.EH.4.70.1	EH	4	70	1	4.2	13.6	12.4562	160.145	68.935	35.0544	21.8	0.309227	d.145.1.3	CO dehydrogenase flavoprotein N-terminal domain-like	0.356223	General	Small molecule binding	ABE	high_disorder
DS.EH.4.3.7	EH	4	3	7	6	8.4	10.7426	161.496	79.5584	70.6844	18.4	0.566763	d.145.1.3	CO dehydrogenase flavoprotein N-terminal domain-like	0.356223	General	Small molecule binding	ABE	high_disorder
DS.EH.4.3.11	EH	4	3	11	4.66667	10.3333	10.5257	164.767	53.6753	65.778	19	0.338039	d.145.1.3	CO dehydrogenase flavoprotein N-terminal domain-like	0.356223	General	Small molecule binding	ABE	high_disorder
DS.EH.4.21.2	EH	4	21	2	3.75	10.25	13.079	162.317	65.7827	37.6987	18	0.64787	d.145.1.3	CO dehydrogenase flavoprotein N-terminal domain-like	0.356223	General	Small molecule binding	ABE	high_disorder
DS.BK.2.8.3	BK	2	8	3	3.33333	4.75	7.84908	85.1566	103.33	66.0915	10.0833	0.910714	b.80.8.1	Pentapeptide repeats	0.356223	Other	Function unknown	ABEV	high_disorder
DS.BN.2.3.30	BN	2	3	30	6.58333	6.5	5.05742	158.092	335.582	104.725	15.0833	0.722102	b.82.4.1	Regulatory protein AraC	0.356223	Information	Transcription	BEV	high_disorder
DS.BN.2.4.19	BN	2	4	19	6.7	6.5	5.1794	132.938	324.247	101.017	15.2	0.511073	d.87.2.1	CO dehydrogenase flavoprotein C-terminal domain-like	0.356223	Metabolism	Other enzymes	ABE	high_disorder
DS.HE.3.10.11	HE	3	10	11	7	5.66667	9.184	88.894	102.059	83.199	15.6667	0.77193	a.4.5.3	Arginine repressor (ArgR), N-terminal DNA-binding domain	0.356223	Regulation	DNA-binding (transcription factors)	ABEV	high_disorder
DS.EH.5.15.2	EH	5	15	2	4	11	13.6307	146.572	323.249	67.23	20	0.633174	c.1.12.5	HpcH/HpaI aldolase	0.356223	Metabolism	Energy production and conversion	ABEV	high_disorder
DS.EH.2.9.8	EH	2	9	8	5.25	7.5	7.76675	117.93	162.032	47.2413	14.75	0.826923	c.1.12.5	HpcH/HpaI aldolase	0.356223	Metabolism	Energy production and conversion	ABEV	high_disorder
DS.BN.7.23.1	BN	7	23	1	5.14286	4.57143	4.85114	155.442	344.122	100.73	16.7143	0.720242	a.129.1.1	GroEL chaperone, ATPase domain	0.356223	Intracellular_processes	Posttranslational modification, protein turnover, chaperones	ABEV	high_disorder
DS.EH.3.152.1	EH	3	152	1	5.66667	6	13.1487	95.8003	155.074	10.9897	14.6667	0.833333	c.1.9.15	PP1699/LP2961-like	0.356223	Metabolism	Other enzymes	ABE	high_disorder
DS.GH.2.26.1	GH	2	26	1	3	14.6667	6.66167	17.065	193.215	33.748	19.6667	0.395155	c.1.9.15	PP1699/LP2961-like	0.356223	Metabolism	Other enzymes	ABE	high_disorder
DS.HE.5.27.3	HE	5	27	3	4	3	14.3263	163.753	121.537	131.922	12	0	c.1.9.15	PP1699/LP2961-like	0.356223	Metabolism	Other enzymes	ABE	ordered
DS.HH.6.59.1	HH	6	59	1	11	11.3333	13.5137	109.559	345.351	127.053	28.3333	0.37421	a.4.5.3	Arginine repressor (ArgR), N-terminal DNA-binding domain	0.356223	Regulation	DNA-binding (transcription factors)	ABEV	high_disorder
DS.HH.1.9.2	HH	1	9	2	6	10	4.27367	41.9417	86.792	83.754	17	0.470588	c.1.9.15	PP1699/LP2961-like	0.356223	Metabolism	Other enzymes	ABE	high_disorder
DS.EG.3.10.3	EG	3	10	3	6.66667	3	8.36867	145.993	60.359	49.4363	12.6667	0.769231	c.1.12.5	HpcH/HpaI aldolase	0.356223	Metabolism	Energy production and conversion	ABEV	high_disorder
DS.HG.1.2.37	HG	1	2	37	8.66667	3	5.748	155.786	52.5513	91.8963	12.6667	0.614035	c.1.9.15	PP1699/LP2961-like	0.356223	Metabolism	Other enzymes	ABE	high_disorder
DS.HE.6.106.1	HE	6	106	1	7	10.3333	12.2037	70.708	357.047	114.802	23.3333	0.630435	d.190.1.2	UTRA domain	0.356223	Metabolism	Other enzymes	BE	high_disorder
DS.HE.6.25.1	HE	6	25	1	7	10.8	11.7334	74.7594	353.745	113.126	23.8	0.311232	d.190.1.2	UTRA domain	0.356223	Metabolism	Other enzymes	BE	high_disorder
DS.HE.6.4.2	HE	6	4	2	12.3333	7.66667	14.8117	164.081	18.7373	117.279	26	0.267482	d.190.1.2	UTRA domain	0.356223	Metabolism	Other enzymes	BE	moderate_disorder
DS.HG.3.18.2	HG	3	18	2	8	3	10.939	124.149	78.7217	23.3297	14	1	c.134.1.1	LmbE-like	0.356223	Other	Function unknown	ABEV	high_disorder
DS.GH.2.1.32	GH	2	1	32	3	11.8333	9.30533	145.697	94.9677	79.2042	16.8333	0.6875	c.134.1.1	LmbE-like	0.356223	Other	Function unknown	ABEV	high_disorder
DS.EH.4.141.1	EH	4	141	1	6.33333	13.6667	7.251	153.393	58.131	78.996	24	0.580244	c.134.1.1	LmbE-like	0.356223	Other	Function unknown	ABEV	high_disorder
DS.BN.6.105.1	BN	6	105	1	3	5.66667	7.64467	165.273	335.798	42.498	14.6667	1	d.129.3.5	AHSA1 domain	0.356223	General	General or several functions	ABEV	high_disorder
DS.HH.5.34.1	HH	5	34	1	13.2857	14	12.5304	126.144	209.776	108.78	32.2857	0.259713	a.100.1.6	Glycerol-3-phosphate dehydrogenase	0.356223	Metabolism	Energy production and conversion	ABE	moderate_disorder
DS.GE.1.25.2	GE	1	25	2	3	7	6.3376	87.5748	17.9566	105.689	11	0.682353	d.111.1.1	PR-1-like	0.360515	Metabolism	Secondary metabolites biosynthesis, transport and catabolism	ABEV	high_disorder
DS.BN.7.32.1	BN	7	32	1	7.2	6.2	5.1226	161.435	339.167	102.891	20.4	0.25311	d.111.1.1	PR-1-like	0.360515	Metabolism	Secondary metabolites biosynthesis, transport and catabolism	ABEV	moderate_disorder
DS.BK.5.60.1	BK	5	60	1	4.25	6.25	7.516	160.961	22.274	52.7707	15.5	0.857143	b.3.1.2	Rhamnogalacturonase B, RhgB, middle domain	0.360515	Metabolism	Polysaccharide metabolism	ABE	high_disorder
DS.HG.2.1.27	HG	2	1	27	8.5	3.25	6.73925	22.8008	260.959	37.7822	13.75	0.614583	d.111.1.1	PR-1-like	0.360515	Metabolism	Secondary metabolites biosynthesis, transport and catabolism	ABEV	high_disorder
DS.HG.2.6.4	HG	2	6	4	9.5	3	7.71125	123.119	29.14	113.678	14.5	0.347356	c.123.1.1	CoA-transferase family III (CaiB/BaiF)	0.360515	Metabolism	Transferases	ABE	high_disorder
DS.HE.4.153.1	HE	4	153	1	8	4.75	11.3488	154.525	6.506	119.933	16.75	0.708204	c.123.1.1	CoA-transferase family III (CaiB/BaiF)	0.360515	Metabolism	Transferases	ABE	high_disorder
DS.EH.4.37.1	EH	4	37	1	5.25	9.125	9.28025	140.531	119.105	80.3919	18.375	0.241959	c.70.1.1	Nucleoside hydrolase	0.360515	Metabolism	Nucleotide transport and metabolism	ABE	moderate_disorder
DS.GG.1.2.5	GG	1	2	5	3	3	4.56857	51.6984	20.4057	82.7506	7	1	d.110.9.1	GlcG-like	0.360515	Other	Function unknown	ABE	high_disorder
DS.HE.4.185.1	HE	4	185	1	11	4.25	7.04475	111.566	149.69	65.8877	19.25	0.431695	c.70.1.1	Nucleoside hydrolase	0.360515	Metabolism	Nucleotide transport and metabolism	ABE	high_disorder
DS.BK.2.6.1	BK	2	6	1	4.64286	3.57143	8.67107	75.1911	72.8766	51.0351	10.2143	0.928571	c.70.1.1	Nucleoside hydrolase	0.360515	Metabolism	Nucleotide transport and metabolism	ABE	high_disorder
DS.HE.4.231.1	HE	4	231	1	13.3333	4.66667	8.44567	125.99	116.542	70.9737	22	0.386883	c.70.1.1	Nucleoside hydrolase	0.360515	Metabolism	Nucleotide transport and metabolism	ABE	high_disorder
DS.HH.2.5.7	HH	2	5	7	12.7692	12.6923	6.52108	104.072	148.487	34.8002	27.4615	0.449099	c.70.1.1	Nucleoside hydrolase	0.360515	Metabolism	Nucleotide transport and metabolism	ABE	high_disorder
DS.EG.4.35.1	EG	4	35	1	6	3	8.56767	103.854	164.172	99.9377	13	1	c.69.1.17	Fungal lipases	0.360515	Metabolism	Other enzymes	ABEV	high_disorder
DS.EG.6.3.1	EG	6	3	1	8.5	3	18.8328	58.4357	296.027	63.0105	17.5	0.696279	c.69.1.17	Fungal lipases	0.360515	Metabolism	Other enzymes	ABEV	high_disorder
DS.HG.0.1.47	HG	0	1	47	12.6875	4.0625	3.2805	52.7566	54.4288	64.8827	16.75	0.578435	c.69.1.17	Fungal lipases	0.360515	Metabolism	Other enzymes	ABEV	high_disorder
DS.HE.5.17.4	HE	5	17	4	16.6667	5	12.9933	165.362	351.952	127.422	26.6667	0.210317	d.110.9.1	GlcG-like	0.360515	Other	Function unknown	ABE	moderate_disorder
DS.HE.4.10.11	HE	4	10	11	9.5	6	9.3865	130.507	77.382	52.6247	19.5	0.263113	c.123.1.1	CoA-transferase family III (CaiB/BaiF)	0.360515	Metabolism	Transferases	ABE	moderate_disorder
DS.BN.10.13.1	BN	10	13	1	3	3	4.97367	145.908	354.285	102.145	16	0.770833	c.70.1.1	Nucleoside hydrolase	0.360515	Metabolism	Nucleotide transport and metabolism	ABE	high_disorder
DS.BN.2.16.4	BN	2	16	4	6.6	6.6	4.9528	170.752	336.502	98.6822	15.2	0.605017	d.66.1.6	YbcJ-like	0.360515	Regulation	RNA processing and modification	ABE	high_disorder
DS.GE.0.7.1	GE	0	7	1	3	5.19048	3.54886	83.733	100.107	96.0291	8.19048	0.97619	b.30.5.4	Aldose 1-epimerase (mutarotase)	0.360515	Metabolism	Other enzymes	ABE	high_disorder
DS.EG.3.61.1	EG	3	61	1	9.33333	3	7.27633	51.035	149.276	41.7473	15.3333	1	b.30.5.4	Aldose 1-epimerase (mutarotase)	0.360515	Metabolism	Other enzymes	ABE	high_disorder
DS.BN.4.29.1	BN	4	29	1	6.47619	7.38095	4.84814	145.66	336.89	99.6933	17.8571	0.51566	b.30.5.4	Aldose 1-epimerase (mutarotase)	0.360515	Metabolism	Other enzymes	ABE	high_disorder
DS.BK.5.34.1	BK	5	34	1	3	9	8.5782	127.715	104.884	77.6978	17	0.566667	b.30.5.4	Aldose 1-epimerase (mutarotase)	0.360515	Metabolism	Other enzymes	ABE	high_disorder
DS.BN.4.84.1	BN	4	84	1	7.4	10	4.5048	119.534	5.2148	93.3656	21.4	0.475821	d.110.9.1	GlcG-like	0.360515	Other	Function unknown	ABE	high_disorder
DS.HE.5.132.1	HE	5	132	1	11.3333	3.66667	11.2803	162.471	145.323	123.168	20	0.309524	c.56.6.1	LigB-like	0.360515	Metabolism	Oxidation/Reduction	ABE	high_disorder
DS.EH.5.18.1	EH	5	18	1	4.6	11.6	12.4544	157.331	100.044	33.8922	21.2	0.554078	c.123.1.1	CoA-transferase family III (CaiB/BaiF)	0.360515	Metabolism	Transferases	ABE	high_disorder
DS.BK.2.1.19	BK	2	1	19	3.625	2.875	10.1971	37.5651	83.5743	31.6859	8.5	1	b.3.1.2	Rhamnogalacturonase B, RhgB, middle domain	0.360515	Metabolism	Polysaccharide metabolism	ABE	high_disorder
DS.BK.9.13.1	BK	9	13	1	7	7.66667	14.9127	145.812	338.429	80.8227	23.6667	0.330779	d.38.1.4	MaoC-like	0.360515	Metabolism	Lipid transport and metabolism	ABE	high_disorder
DS.EG.3.59.1	EG	3	59	1	6.33333	3	11.7237	97.5693	149.304	30.2787	12.3333	0.722222	d.16.1.5	L-aminoacid/polyamine oxidase	0.360515	Metabolism	Oxidation/Reduction	ABE	high_disorder
DS.EH.3.61.2	EH	3	61	2	3.33333	9	12.3827	108.486	127.079	40.5387	15.3333	0.664474	d.16.1.5	L-aminoacid/polyamine oxidase	0.360515	Metabolism	Oxidation/Reduction	ABE	high_disorder
DS.EH.4.127.1	EH	4	127	1	6	12	10.3663	118.591	355.892	88.5893	22	0.151515	d.133.1.1	Molybdenum cofactor-binding domain	0.360515	Metabolism	Electron transfer/transport	ABE	moderate_disorder
DS.HH.3.16.4	HH	3	16	4	27	11.5	9.26375	122.974	65.2805	38.9648	41.5	0.519805	d.16.1.5	L-aminoacid/polyamine oxidase	0.360515	Metabolism	Oxidation/Reduction	ABE	high_disorder
DS.HE.4.76.2	HE	4	76	2	10.25	5	7.55975	159.975	119.581	77.9405	19.25	0.298551	c.23.5.2	Cytochrome p450 reductase N-terminal domain-like	0.360515	Metabolism	Oxidation/Reduction	BE	moderate_disorder
DS.BK.8.13.1	BK	8	13	1	10.5	10.75	15.809	141.042	334.077	74.9802	29.25	0.301277	d.38.1.4	MaoC-like	0.360515	Metabolism	Lipid transport and metabolism	ABE	high_disorder
DS.HH.6.29.1	HH	6	29	1	9.25	12.5	14.4205	116.906	6.7285	27.4052	27.75	0.287562	d.16.1.5	L-aminoacid/polyamine oxidase	0.360515	Metabolism	Oxidation/Reduction	ABE	moderate_disorder
DS.GE.2.5.9	GE	2	5	9	3	3.33333	9.12067	72.1267	116.72	72.591	8.33333	1	b.82.1.10	TM1459-like	0.360515	Metabolism	Nitrogen metabolism	ABEV	high_disorder
DS.BK.3.104.1	BK	3	104	1	2.75	6.75	11.7267	64.3743	59.2767	35.019	12.5	0.833333	d.283.1.1	Putative modulator of DNA gyrase, PmbA/TldD	0.360515	Information	DNA replication, recombination, repair	ABE	high_disorder
DS.BK.3.47.1	BK	3	47	1	2.8	4	11.2716	38.3266	349.05	36.0398	9.8	1	d.283.1.1	Putative modulator of DNA gyrase, PmbA/TldD	0.360515	Information	DNA replication, recombination, repair	ABE	high_disorder
DS.BK.3.7.3	BK	3	7	3	5.46154	4.23077	12.4222	56.9774	102.142	31.5741	12.6923	0.76066	d.38.1.4	MaoC-like	0.360515	Metabolism	Lipid transport and metabolism	ABE	high_disorder
DS.BK.9.6.1	BK	9	6	1	7	13.5	17.221	151.595	349.058	59.1985	29.5	0.494861	d.38.1.4	MaoC-like	0.360515	Metabolism	Lipid transport and metabolism	ABE	high_disorder
DS.BK.1.1.22	BK	1	1	22	3.71429	4.14286	6.56343	6.64	163.914	7.63229	8.85714	0.857143	d.16.1.5	L-aminoacid/polyamine oxidase	0.360515	Metabolism	Oxidation/Reduction	ABE	high_disorder
DS.GH.0.1.63	GH	0	1	63	4.3	11.9	2.6917	32.2173	59.0159	24.9739	16.2	0.490641	a.132.1.4	PqqC-like	0.360515	Metabolism	Oxidation/Reduction	AB	high_disorder
DS.BN.3.33.2	BN	3	33	2	8.5	8.5	4.6145	172.102	6.29025	98.3782	20	0.591964	d.283.1.1	Putative modulator of DNA gyrase, PmbA/TldD	0.360515	Information	DNA replication, recombination, repair	ABE	high_disorder
DS.EH.0.11.1	EH	0	11	1	10.4	6.6	2.8152	80.3428	20.9874	11.3228	17	0.522121	d.283.1.1	Putative modulator of DNA gyrase, PmbA/TldD	0.360515	Information	DNA replication, recombination, repair	ABE	high_disorder
DS.HE.3.13.10	HE	3	13	10	9.2	5.4	8.383	129.27	107.795	52.6454	17.6	0.470374	d.283.1.1	Putative modulator of DNA gyrase, PmbA/TldD	0.360515	Information	DNA replication, recombination, repair	ABE	high_disorder
DS.HE.4.155.1	HE	4	155	1	12	8.75	7.40225	126.192	122.682	39.4798	24.75	0.401458	d.283.1.1	Putative modulator of DNA gyrase, PmbA/TldD	0.360515	Information	DNA replication, recombination, repair	ABE	high_disorder
DS.HE.4.4.19	HE	4	4	19	14	9.66667	7.89833	158.202	12.5363	94.1873	27.6667	0.341951	d.283.1.1	Putative modulator of DNA gyrase, PmbA/TldD	0.360515	Information	DNA replication, recombination, repair	ABE	high_disorder
DS.EH.8.17.1	EH	8	17	1	5	13	10.8253	127.118	340.699	99.31	26	0.538462	d.133.1.1	Molybdenum cofactor-binding domain	0.360515	Metabolism	Electron transfer/transport	ABE	high_disorder
DS.GE.3.77.1	GE	3	77	1	3.66667	5	10.796	101.481	108.243	82.744	11.6667	0.435897	b.82.1.10	TM1459-like	0.360515	Metabolism	Nitrogen metabolism	ABEV	high_disorder
DS.GG.4.3.1	GG	4	3	1	3	3	14.2863	106.968	303.501	142.404	10	1	d.38.1.4	MaoC-like	0.360515	Metabolism	Lipid transport and metabolism	ABE	high_disorder
DS.HH.4.96.1	HH	4	96	1	11	4	15.0293	112.095	251.498	126.014	19	0.561404	d.38.1.4	MaoC-like	0.360515	Metabolism	Lipid transport and metabolism	ABE	high_disorder
DS.HH.4.7.3	HH	4	7	3	13	10.5	9.6475	105.366	23.1352	104.039	27.5	0.201156	a.132.1.4	PqqC-like	0.360515	Metabolism	Oxidation/Reduction	AB	moderate_disorder
DS.EG.1.10.8	EG	1	10	8	5	3	5.80233	54.4523	339.965	63.968	9	1	c.1.8.5	Type II chitinase	0.364807	Metabolism	Carbohydrate transport and metabolism	ABEV	high_disorder
DS.HE.4.11.3	HE	4	11	3	13.8889	5.88889	10.447	162.062	110.865	115.454	23.7778	0.409055	c.1.8.5	Type II chitinase	0.364807	Metabolism	Carbohydrate transport and metabolism	ABEV	high_disorder
DS.EG.1.10.6	EG	1	10	6	5	3	6.14875	51.2398	344.656	71.066	9	1	c.1.8.5	Type II chitinase	0.364807	Metabolism	Carbohydrate transport and metabolism	ABEV	high_disorder
DS.BN.3.1.3	BN	3	1	3	6.42857	6.85714	5.75504	172.914	303.65	65.8032	16.2857	0.399436	b.29.1.2	Glycosyl hydrolases family 16	0.364807	Metabolism	Secondary metabolites biosynthesis, transport and catabolism	ABEV	high_disorder
DS.EG.1.2.8	EG	1	2	8	4.52174	3.13043	6.89691	103.025	151.043	9.16074	8.65217	0.873188	b.29.1.2	Glycosyl hydrolases family 16	0.364807	Metabolism	Secondary metabolites biosynthesis, transport and catabolism	ABEV	high_disorder
DS.HG.2.14.1	HG	2	14	1	12.1429	3	8.52043	73.2239	19.6127	72.3494	17.1429	0.533534	c.100.1.1	Thiamin pyrophosphokinase, catalytic domain	0.364807	Metabolism	Coenzyme metabolism	ABEV	high_disorder
DS.HE.6.93.1	HE	6	93	1	14.6667	5.66667	14.1123	155.176	354.462	123.893	26.3333	0.227949	c.100.1.1	Thiamin pyrophosphokinase, catalytic domain	0.364807	Metabolism	Coenzyme metabolism	ABEV	moderate_disorder
DS.EH.7.58.1	EH	7	58	1	4	14.6667	11.465	120.426	338.583	75.508	25.6667	0.349231	c.100.1.1	Thiamin pyrophosphokinase, catalytic domain	0.364807	Metabolism	Coenzyme metabolism	ABEV	high_disorder
DS.EH.2.22.1	EH	2	22	1	6	9.8	4.702	110.326	80.1194	79.4628	17.8	0.39125	c.100.1.1	Thiamin pyrophosphokinase, catalytic domain	0.364807	Metabolism	Coenzyme metabolism	ABEV	high_disorder
DS.HE.3.21.6	HE	3	21	6	4	3.5	4.4625	100.797	121.778	25.726	10.5	1	c.18.1.1	Uracil-DNA glycosylase	0.364807	Information	DNA replication, recombination, repair	ABEV	high_disorder
DS.GE.2.30.2	GE	2	30	2	3	12	7.50633	61.5397	66.1007	72.942	17	0.147591	b.29.1.2	Glycosyl hydrolases family 16	0.364807	Metabolism	Secondary metabolites biosynthesis, transport and catabolism	ABEV	moderate_disorder
DS.GE.2.9.4	GE	2	9	4	3	8.75	9.544	150.077	118.066	111.317	13.75	0.339286	b.29.1.2	Glycosyl hydrolases family 16	0.364807	Metabolism	Secondary metabolites biosynthesis, transport and catabolism	ABEV	high_disorder
DS.BN.9.8.1	BN	9	8	1	8.25	6.25	5.7415	137.291	329.76	69.9075	23.5	0.694712	b.43.4.1	NADPH-cytochrome p450 reductase FAD-binding domain-like	0.364807	Metabolism	Coenzyme metabolism	BE	high_disorder
DS.EH.5.186.1	EH	5	186	1	4	9.66667	18.8017	41.327	207.198	34.4993	18.6667	0.485243	b.43.4.1	NADPH-cytochrome p450 reductase FAD-binding domain-like	0.364807	Metabolism	Coenzyme metabolism	BE	high_disorder
DS.HE.5.72.1	HE	5	72	1	11	5.4	11.8176	146.041	61.613	108.452	21.4	0.405004	c.97.1.1	Cytidine deaminase	0.364807	Metabolism	Other enzymes	ABE	high_disorder
DS.HE.4.9.11	HE	4	9	11	7.8	4.2	8.4452	131.051	58.724	64.6732	16	0.386538	c.1.8.5	Type II chitinase	0.364807	Metabolism	Carbohydrate transport and metabolism	ABEV	high_disorder
DS.HE.4.11.5	HE	4	11	5	13.4286	4.57143	10.44	166.82	83.2011	112.551	22	0.354193	d.67.1.1	Threonyl-tRNA synthetase (ThrRS), second 'additional' domain	0.364807	Information	Translation, ribosomes, ribosome biogenesis; tRNA metabolism	ABE	high_disorder
DS.EG.0.4.13	EG	0	4	13	6.33333	4.66667	3.87367	125.6	127.191	15.2873	11	0.666667	c.25.1.4	NADPH-cytochrome p450 reductase-like	0.364807	Metabolism	Oxidation/Reduction	BE	high_disorder
DS.BK.2.2.5	BK	2	2	5	4.95238	4.19048	7.88219	77.33	109.17	42.9484	11.1429	0.90056	b.80.1.1	Pectate lyase-like	0.364807	Metabolism	Polysaccharide metabolism	ABEV	high_disorder
DS.HE.4.2.7	HE	4	2	7	11.0476	4.38095	10.5077	158.829	151.845	114.759	19.4286	0.480656	c.37.1.24	Type II thymidine kinase	0.364807	General	Small molecule binding	ABEV	high_disorder
DS.EH.5.151.1	EH	5	151	1	4.66667	10.3333	12.4733	131.875	342.286	59.067	20	0.623104	c.23.10.3	Acetylhydrolase	0.364807	Metabolism	Other enzymes	ABEV	high_disorder
DS.EH.3.30.2	EH	3	30	2	4.5	6.75	8.4405	145.848	33.1645	63.2867	14.25	0.571078	c.37.1.24	Type II thymidine kinase	0.364807	General	Small molecule binding	ABEV	high_disorder
DS.EH.5.1.8	EH	5	1	8	5.83333	11	12.3193	155.975	346.188	63.6798	21.8333	0.568198	d.58.14.1	Ribosomal protein S6	0.364807	Information	Translation, ribosomes, ribosome biogenesis; tRNA metabolism	BE	high_disorder
DS.BN.2.40.3	BN	2	40	3	7	7	4.50033	136.166	7.54767	95.6623	16	0.729167	d.58.14.1	Ribosomal protein S6	0.364807	Information	Translation, ribosomes, ribosome biogenesis; tRNA metabolism	BE	high_disorder
DS.HH.5.5.4	HH	5	5	4	12	14.6667	12.6807	162.024	340.152	49.005	31.6667	0.271062	a.4.9.1	Polynucleotide phosphorylase/guanosine pentaphosphate synthase (PNPase/GPSI), domain 3	0.364807	Information	RNA-binding, RNA procecsing, dynamics	BE	moderate_disorder
DS.EG.2.30.1	EG	2	30	1	4.8	4	7.2707	53.7296	14.0529	33.3774	10.8	0.82094	c.37.1.24	Type II thymidine kinase	0.364807	General	Small molecule binding	ABEV	high_disorder
DS.HH.4.85.1	HH	4	85	1	12.6667	15.3333	10.099	138.767	21.1253	86.382	32	0.35822	a.4.1.2	Recombinase DNA-binding domain	0.364807	Regulation	DNA-binding (transcription factors)	ABEV	high_disorder
DS.BN.4.5.2	BN	4	5	2	7.68627	8.56863	5.87425	153.924	334.517	64.4283	20.2549	0.38977	f.4.3.3	Ligand-gated protein channel	0.364807	Intracellular_processes	Transport	BEV	high_disorder
DS.BK.7.22.1	BK	7	22	1	7	19.3333	10.3263	162.559	10.6317	68.2383	33.3333	0.340412	b.18.1.1	Galactose-binding domain	0.364807	Metabolism	Carbohydrate transport and metabolism	ABEV	high_disorder
DS.BN.5.20.1	BN	5	20	1	8.57143	9.71429	7.677	159.883	333.169	42.1936	23.2857	0.427367	f.4.3.3	Ligand-gated protein channel	0.364807	Intracellular_processes	Transport	BEV	high_disorder
DS.HH.5.92.1	HH	5	92	1	12.6667	15.6667	12.38	163.902	242.232	59.2957	33.3333	0.341787	b.43.4.1	NADPH-cytochrome p450 reductase FAD-binding domain-like	0.364807	Metabolism	Coenzyme metabolism	BE	high_disorder
DS.HG.4.7.3	HG	4	7	3	12	3	10.1038	61.6828	27.4324	111.618	19	0.752597	d.157.1.5	Methyl parathion hydrolase	0.364807	Metabolism	Oxidation/Reduction	ABE	high_disorder
DS.HE.2.42.2	HE	2	42	2	11.3333	4	8.56733	149.394	99.3353	104.416	17.3333	0.566922	d.157.1.5	Methyl parathion hydrolase	0.364807	Metabolism	Oxidation/Reduction	ABE	high_disorder
DS.BN.2.4.15	BN	2	4	15	4.25	4.25	4.86325	128.836	334.242	96.1278	10.5	0.741124	d.157.1.5	Methyl parathion hydrolase	0.364807	Metabolism	Oxidation/Reduction	ABE	high_disorder
DS.HG.0.1.39	HG	0	1	39	12	3.31579	3.29495	47.9222	354.215	67.3503	15.3158	0.707274	d.58.26.1	Homoserine kinase	0.364807	Regulation	Kinases and phosphatases and inhibitors	ABE	high_disorder
DS.EG.2.74.1	EG	2	74	1	4	4	10.1363	152.423	37.8023	23.467	10	1	c.25.1.4	NADPH-cytochrome p450 reductase-like	0.364807	Metabolism	Oxidation/Reduction	BE	high_disorder
DS.HE.6.20.1	HE	6	20	1	8	3	7.039	163.836	113.452	104.22	17	0.490196	c.121.1.1	Ribose/Galactose isomerase RpiB/AlsB	0.364807	Metabolism	Other enzymes	ABE	high_disorder
DS.GH.2.2.15	GH	2	2	15	3	9	9.72912	110.174	350.777	98.351	14	0.827851	c.121.1.1	Ribose/Galactose isomerase RpiB/AlsB	0.364807	Metabolism	Other enzymes	ABE	high_disorder
DS.EH.4.15.3	EH	4	15	3	6	10.3333	7.76967	155.246	99.719	66.3833	20.3333	0.350725	c.121.1.1	Ribose/Galactose isomerase RpiB/AlsB	0.364807	Metabolism	Other enzymes	ABE	high_disorder
DS.HE.5.131.1	HE	5	131	1	4	4.66667	8.384	162.112	143.907	69.065	13.6667	1	f.4.3.3	Ligand-gated protein channel	0.364807	Intracellular_processes	Transport	BEV	high_disorder
DS.EH.3.60.1	EH	3	60	1	4.42857	12.5714	9.56714	168.447	80.4881	48.1137	20	0.364218	c.121.1.1	Ribose/Galactose isomerase RpiB/AlsB	0.364807	Metabolism	Other enzymes	ABE	high_disorder
DS.EH.1.1.58	EH	1	1	58	5	9.66667	7.04533	140.8	100.195	35.562	15.6667	0.62144	c.121.1.1	Ribose/Galactose isomerase RpiB/AlsB	0.364807	Metabolism	Other enzymes	ABE	high_disorder
DS.BK.5.80.1	BK	5	80	1	9	3	7.67033	105.137	79.493	82.4583	17	0.117647	b.80.1.5	Pectin methylesterase	0.369099	Metabolism	Polysaccharide metabolism	ABEV	moderate_disorder
DS.EH.3.50.2	EH	3	50	2	7.33333	8.66667	10.8797	117.475	170.359	37.926	19	0.587937	b.80.1.5	Pectin methylesterase	0.369099	Metabolism	Polysaccharide metabolism	ABEV	high_disorder
DS.EG.6.15.1	EG	6	15	1	7	3	8.46533	74.313	335.587	70.3233	16	0.690476	c.69.1.28	Aclacinomycin methylesterase RdmC	0.369099	Metabolism	Other enzymes	ABE	high_disorder
DS.GH.2.3.16	GH	2	3	16	3	12.4	8.4288	95.982	39.599	68.5048	17.4	0.516667	c.69.1.28	Aclacinomycin methylesterase RdmC	0.369099	Metabolism	Other enzymes	ABE	high_disorder
DS.EG.1.9.2	EG	1	9	2	6.30769	4.07692	6.43862	84.0267	61.0959	11.3719	11.3846	0.852071	d.92.2.1	beta-N-acetylhexosaminidase domain	0.369099	Metabolism	Other enzymes	BE	high_disorder
DS.HE.1.2.9	HE	1	2	9	6.4	4.2	4.2976	33.2168	164.693	16.251	11.6	1	f.5.1.1	Outer membrane efflux proteins (OEP)	0.369099	Intracellular_processes	Transport	BE	high_disorder
DS.BK.2.16.2	BK	2	16	2	5.875	8.25	8.16137	125.77	78.5293	67.3245	16.125	0.41223	b.80.1.3	Galacturonase	0.369099	Metabolism	Polysaccharide metabolism	ABEV	high_disorder
DS.BK.5.97.1	BK	5	97	1	8.66667	6	10.712	100.651	75.7407	110.212	19.6667	0.57807	b.80.1.3	Galacturonase	0.369099	Metabolism	Polysaccharide metabolism	ABEV	high_disorder
DS.GE.4.1.1	GE	4	1	1	6.5	6.33333	12.192	142.995	106.78	80.496	16.8333	0.425195	c.69.1.28	Aclacinomycin methylesterase RdmC	0.369099	Metabolism	Other enzymes	ABE	high_disorder
DS.BK.5.110.1	BK	5	110	1	3.66667	3	8.648	107.762	78.2167	79.3463	11.6667	0.690476	b.80.1.3	Galacturonase	0.369099	Metabolism	Polysaccharide metabolism	ABEV	high_disorder
DS.BK.2.14.3	BK	2	14	3	4.14286	5	8.87271	102.757	73.9069	23.603	11.1429	0.625	b.80.1.5	Pectin methylesterase	0.369099	Metabolism	Polysaccharide metabolism	ABEV	high_disorder
DS.GE.2.33.2	GE	2	33	2	3	5	8.751	100.957	61.281	94.2603	10	1	c.1.8.6	beta-N-acetylhexosaminidase catalytic domain	0.369099	Metabolism	Carbohydrate transport and metabolism	ABEV	high_disorder
DS.GE.1.11.2	GE	1	11	2	3	8	5.94743	11.4594	302.698	55.7833	12	1	e.38.1.1	Release factor	0.369099	Information	Translation, ribosomes, ribosome biogenesis; tRNA metabolism	BEV	high_disorder
DS.BN.4.142.1	BN	4	142	1	6	5.66667	6.029	148.798	320.795	74.211	15.6667	0.594444	b.69.3.1	Nitrous oxide reductase, N-terminal domain	0.369099	Metabolism	Oxidation/Reduction	ABEV	high_disorder
DS.BN.2.7.15	BN	2	7	15	7	6	5.092	119.288	324.872	106.566	15	0.650155	b.69.3.1	Nitrous oxide reductase, N-terminal domain	0.369099	Metabolism	Oxidation/Reduction	ABEV	high_disorder
DS.BK.2.80.1	BK	2	80	1	5.5	2.5	8.49175	84.6543	52.8353	20.191	10	0.5	c.1.8.13	YicI catalytic domain-like	0.369099	Metabolism	Carbohydrate transport and metabolism	ABE	high_disorder
DS.EH.8.14.1	EH	8	14	1	2	11.3333	12.4203	144.77	186.773	19.2587	21.3333	0.345599	c.1.8.13	YicI catalytic domain-like	0.369099	Metabolism	Carbohydrate transport and metabolism	ABE	high_disorder
DS.GE.1.5.9	GE	1	5	9	4.6	3.6	5.5508	52.995	157.813	38.9456	9.2	1	c.1.8.13	YicI catalytic domain-like	0.369099	Metabolism	Carbohydrate transport and metabolism	ABE	high_disorder
DS.GE.2.9.5	GE	2	9	5	4	3	8.37367	116.113	110.49	81.4533	9	1	c.1.8.13	YicI catalytic domain-like	0.369099	Metabolism	Carbohydrate transport and metabolism	ABE	high_disorder
DS.GH.2.1.56	GH	2	1	56	5.33333	11	8.40067	156.746	50.8213	56.152	18.3333	0.466403	a.156.1.2	Middle domain of MutM-like DNA repair proteins	0.369099	Information	Translation, ribosomes, ribosome biogenesis; tRNA metabolism	ABEV	high_disorder
DS.HE.4.40.3	HE	4	40	3	14	4.66667	9.16167	156.183	26.4343	102.344	22.6667	0.569444	c.1.8.13	YicI catalytic domain-like	0.369099	Metabolism	Carbohydrate transport and metabolism	ABE	high_disorder
DS.HG.4.26.1	HG	4	26	1	10.4	3	6.355	55.401	68.2854	22.2342	17.4	0.55038	c.119.1.2	DAK1	0.369099	Metabolism	Polysaccharide metabolism	ABE	high_disorder
DS.EG.0.2.32	EG	0	2	32	4.33333	3.33333	3.41767	87.8488	324.282	8.99367	7.66667	1	d.114.1.1	5'-nucleotidase (syn. UDP-sugar hydrolase), C-terminal domain	0.369099	Metabolism	Nucleotide transport and metabolism	ABEV	high_disorder
DS.BK.5.26.1	BK	5	26	1	2.5	6.16667	11.3938	114.204	153.798	56.6637	13.6667	0.795833	d.114.1.1	5'-nucleotidase (syn. UDP-sugar hydrolase), C-terminal domain	0.369099	Metabolism	Nucleotide transport and metabolism	ABEV	high_disorder
DS.GH.0.1.109	GH	0	1	109	5	4	3.331	30.973	323.553	65.9095	9	1	b.113.1.1	N-terminal domain of MutM-like DNA repair proteins	0.369099	Information	DNA replication, recombination, repair	ABEV	high_disorder
DS.BK.5.29.1	BK	5	29	1	5.6	5.6	8.431	120.121	97.6474	73.5622	16.2	0.244314	b.113.1.1	N-terminal domain of MutM-like DNA repair proteins	0.369099	Information	DNA replication, recombination, repair	ABEV	moderate_disorder
DS.BK.1.18.1	BK	1	18	1	4	5	5.02733	119.649	104.19	73.5583	10	0.666667	d.114.1.1	5'-nucleotidase (syn. UDP-sugar hydrolase), C-terminal domain	0.369099	Metabolism	Nucleotide transport and metabolism	ABEV	high_disorder
DS.HH.5.48.2	HH	5	48	2	12.3333	13	11.515	116.377	13.3693	71.3487	30.3333	0.560451	a.156.1.2	Middle domain of MutM-like DNA repair proteins	0.369099	Information	Translation, ribosomes, ribosome biogenesis; tRNA metabolism	ABEV	high_disorder
DS.GE.0.2.10	GE	0	2	10	4	6.75	3.4415	52.0285	121.126	91.4032	10.75	0.770833	b.69.3.1	Nitrous oxide reductase, N-terminal domain	0.369099	Metabolism	Oxidation/Reduction	ABEV	high_disorder
DS.BN.5.6.6	BN	5	6	6	7.5	4.75	6.66975	166.412	257.909	138.369	17.25	0.758333	e.38.1.1	Release factor	0.369099	Information	Translation, ribosomes, ribosome biogenesis; tRNA metabolism	BEV	high_disorder
DS.EH.7.32.1	EH	7	32	1	7	13	12.905	160.424	304.189	84.987	27	0.247482	c.1.8.6	beta-N-acetylhexosaminidase catalytic domain	0.369099	Metabolism	Carbohydrate transport and metabolism	ABEV	moderate_disorder
DS.BK.4.8.2	BK	4	8	2	3.58333	2.66667	10.3149	122.973	83.544	62.2711	10.25	0.616667	b.81.1.3	Galactoside acetyltransferase-like	0.369099	Metabolism	Other enzymes	ABEV	high_disorder
DS.HG.8.1.1	HG	8	1	1	10	3	16.2213	12.731	108.433	103.18	21	0.365079	a.156.1.2	Middle domain of MutM-like DNA repair proteins	0.369099	Information	Translation, ribosomes, ribosome biogenesis; tRNA metabolism	ABEV	high_disorder
DS.HH.3.45.1	HH	3	45	1	10	11.7143	11.5924	109.646	3.86043	137.286	24.7143	0.474597	a.5.7.1	DmpG/LeuA communication domain-like	0.369099	Metabolism	Other enzymes	ABEV	high_disorder
DS.BK.4.8.3	BK	4	8	3	3.2	3.8	10.2933	110.627	84.1145	58.6348	11	0.865985	b.81.1.3	Galactoside acetyltransferase-like	0.369099	Metabolism	Other enzymes	ABEV	high_disorder
DS.EG.2.8.6	EG	2	8	6	4.83333	4	8.91767	78.3012	159.88	22.7667	10.8333	0.883333	d.159.1.2	5'-nucleotidase (syn. UDP-sugar hydrolase), N-terminal domain	0.369099	Intracellular_processes	Proteases, peptidases and their inhibitors	ABEV	high_disorder
DS.HE.4.44.2	HE	4	44	2	10.3333	4	9.5485	144.153	108.478	102.558	18.3333	0.429534	d.159.1.2	5'-nucleotidase (syn. UDP-sugar hydrolase), N-terminal domain	0.369099	Intracellular_processes	Proteases, peptidases and their inhibitors	ABEV	high_disorder
DS.BK.7.3.1	BK	7	3	1	2.08333	4.08333	14.3407	116.114	289.844	96.2532	13.1667	0.929487	b.81.1.3	Galactoside acetyltransferase-like	0.369099	Metabolism	Other enzymes	ABEV	high_disorder
DS.BN.4.28.1	BN	4	28	1	4.53333	5.4	4.90053	128.568	336.839	106.373	13.9333	0.725932	b.81.1.3	Galactoside acetyltransferase-like	0.369099	Metabolism	Other enzymes	ABEV	high_disorder
DS.BK.3.115.1	BK	3	115	1	3.75	3.75	11.4648	80.307	76.3935	38.7073	10.5	0.5	b.80.1.5	Pectin methylesterase	0.369099	Metabolism	Polysaccharide metabolism	ABEV	high_disorder
DS.EH.4.23.1	EH	4	23	1	7.33333	10.6667	9.04533	118.964	333.644	83.8213	22	0.6	b.82.2.5	TauD/TfdA-like	0.373391	Metabolism	Secondary metabolites biosynthesis, transport and catabolism	BEV	high_disorder
DS.EH.1.40.1	EH	1	40	1	3.33333	10.3333	6.355	54.6327	239.097	31.8783	14.6667	0.351852	b.45.1.2	NADH:FMN oxidoreductase-like	0.373391	Metabolism	Coenzyme metabolism	ABE	high_disorder
DS.BN.5.75.1	BN	5	75	1	5.66667	5.83333	4.7625	166.909	349.96	97.3392	16.5	0.618163	b.30.5.11	YicI N-terminal domain-like	0.373391	Metabolism	Other enzymes	ABE	high_disorder
DS.BK.3.106.1	BK	3	106	1	3.75	4	11.3257	21.6208	113.735	11.4243	10.75	0.839286	b.30.5.11	YicI N-terminal domain-like	0.373391	Metabolism	Other enzymes	ABE	high_disorder
DS.BN.4.135.1	BN	4	135	1	6.33333	7	4.97833	163.39	335.648	117.322	17.3333	0.543651	b.45.1.2	NADH:FMN oxidoreductase-like	0.373391	Metabolism	Coenzyme metabolism	ABE	high_disorder
DS.HE.2.1.6	HE	2	1	6	12.8286	5.37143	8.60629	168.121	122.834	117.812	20.2	0.438762	c.58.1.2	Tetrahydrofolate dehydrogenase/cyclohydrolase	0.373391	Metabolism	Oxidation/Reduction	ABE	high_disorder
DS.BN.2.1.92	BN	2	1	92	5.5	6.5	4.5925	134.815	342.69	98.6633	14	0.559524	b.18.1.5	beta-Galactosidase/glucuronidase, N-terminal domain	0.373391	Metabolism	Carbohydrate transport and metabolism	ABEV	high_disorder
DS.BK.3.162.1	BK	3	162	1	2	6.33333	8.76333	50.035	83.97	29.5083	11.3333	0.666667	b.18.1.5	beta-Galactosidase/glucuronidase, N-terminal domain	0.373391	Metabolism	Carbohydrate transport and metabolism	ABEV	high_disorder
DS.BK.4.173.1	BK	4	173	1	7.66667	6.33333	7.08933	150.147	37.426	39.3647	18	0.577295	b.1.4.1	beta-Galactosidase/glucuronidase domain	0.373391	Metabolism	Carbohydrate transport and metabolism	ABE	high_disorder
DS.BK.2.5.8	BK	2	5	8	4.33333	4	8.644	39.081	183.796	13.439	10.3333	1	b.18.1.5	beta-Galactosidase/glucuronidase, N-terminal domain	0.373391	Metabolism	Carbohydrate transport and metabolism	ABEV	high_disorder
DS.EH.3.127.1	EH	3	127	1	6.33333	15.6667	10.3063	166.658	190.611	76.7043	25	0.465608	c.58.1.2	Tetrahydrofolate dehydrogenase/cyclohydrolase	0.373391	Metabolism	Oxidation/Reduction	ABE	high_disorder
DS.EG.0.2.31	EG	0	2	31	5.83333	3	3.34117	66.2787	321.894	40.7988	8.83333	1	b.1.4.1	beta-Galactosidase/glucuronidase domain	0.373391	Metabolism	Carbohydrate transport and metabolism	ABE	high_disorder
DS.GE.2.72.1	GE	2	72	1	3	6.33333	7.55733	49.6473	55.586	61.5177	11.3333	0.844444	b.1.4.1	beta-Galactosidase/glucuronidase domain	0.373391	Metabolism	Carbohydrate transport and metabolism	ABE	high_disorder
DS.HH.3.19.1	HH	3	19	1	7.61538	17.7692	9.34692	115.111	162.078	22.4637	28.3846	0.457614	b.82.2.5	TauD/TfdA-like	0.373391	Metabolism	Secondary metabolites biosynthesis, transport and catabolism	BEV	high_disorder
DS.BK.2.4.1	BK	2	4	1	4.875	3.875	7.59863	66.8544	107.489	36.2346	10.75	0.787889	b.45.1.2	NADH:FMN oxidoreductase-like	0.373391	Metabolism	Coenzyme metabolism	ABE	high_disorder
DS.EH.5.79.1	EH	5	79	1	5.75	6.25	11.1483	146.472	115.944	52.0453	17	0.729575	b.45.1.2	NADH:FMN oxidoreductase-like	0.373391	Metabolism	Coenzyme metabolism	ABE	high_disorder
DS.BK.4.123.1	BK	4	123	1	6	5.66667	14.4477	53.042	58.0403	37.634	15.6667	0.842105	b.3.6.1	Aromatic compound dioxygenase	0.373391	Metabolism	Oxidation/Reduction	ABEV	high_disorder
DS.HE.4.137.1	HE	4	137	1	7	5.2	5.4518	129.056	97.082	78.807	16.2	0.404977	d.16.1.2	PHBH-like	0.373391	Metabolism	Oxidation/Reduction	ABE	high_disorder
DS.HE.6.22.1	HE	6	22	1	14.3333	5	13.1203	170.284	124.535	129.708	25.3333	0.35679	c.125.1.1	Creatininase	0.373391	Metabolism	Other enzymes	ABE	high_disorder
DS.HH.4.61.1	HH	4	61	1	10.2	10.8	11.8016	147.377	23.1708	84.6294	25	0.465196	b.3.6.1	Aromatic compound dioxygenase	0.373391	Metabolism	Oxidation/Reduction	ABEV	high_disorder
DS.BN.5.41.1	BN	5	41	1	6.36364	6.81818	4.87827	162.695	344.222	97.9266	18.1818	0.689597	d.16.1.2	PHBH-like	0.373391	Metabolism	Oxidation/Reduction	ABE	high_disorder
DS.BK.3.30.3	BK	3	30	3	3.33333	5.33333	10.5503	63.8973	73.816	36.1543	11.6667	0.666667	d.16.1.2	PHBH-like	0.373391	Metabolism	Oxidation/Reduction	ABE	high_disorder
DS.HE.5.90.1	HE	5	90	1	7.5	3.25	13.3603	99.9073	67.2097	116.862	15.75	1	b.3.6.1	Aromatic compound dioxygenase	0.373391	Metabolism	Oxidation/Reduction	ABEV	high_disorder
DS.HE.4.164.1	HE	4	164	1	13.25	9	9.38975	153.954	36.7182	115.165	26.25	0.268884	d.16.1.2	PHBH-like	0.373391	Metabolism	Oxidation/Reduction	ABE	moderate_disorder
DS.BN.2.107.1	BN	2	107	1	8	7.66667	5.01	150.835	329.815	96.3133	17.6667	0.678161	b.3.6.1	Aromatic compound dioxygenase	0.373391	Metabolism	Oxidation/Reduction	ABEV	high_disorder
DS.BK.2.1.3	BK	2	1	3	3.87234	3.87234	9.48491	24.0616	70.7318	12.3686	9.74468	0.866667	b.3.6.1	Aromatic compound dioxygenase	0.373391	Metabolism	Oxidation/Reduction	ABEV	high_disorder
DS.EG.2.1.20	EG	2	1	20	5	3	8.47563	132.256	21.994	40.1243	10	0.875	c.125.1.1	Creatininase	0.373391	Metabolism	Other enzymes	ABE	high_disorder
DS.EG.0.2.13	EG	0	2	13	5.23529	4.88235	3.02788	81.8778	19.2139	10.5802	10.1176	0.892157	c.125.1.1	Creatininase	0.373391	Metabolism	Other enzymes	ABE	high_disorder
DS.HE.4.4.15	HE	4	4	15	11.5	6	7.8045	164.935	99.3872	96.9735	21.5	0.345328	c.66.1.46	YhhF-like	0.377682	Metabolism	Transferases	ABEV	high_disorder
DS.HE.4.215.1	HE	4	215	1	7	6	12.3547	101.703	109.299	94.9573	17	0.37037	c.66.1.46	YhhF-like	0.377682	Metabolism	Transferases	ABEV	high_disorder
DS.HE.4.229.1	HE	4	229	1	9	7.33333	9.22167	108.321	110.329	47.6797	20.3333	0.472041	d.79.7.1	OmpA-like	0.377682	Metabolism	Cell envelope biogenesis, outer membrane	BEV	high_disorder
DS.HE.1.3.12	HE	1	3	12	7	6.33333	5.49033	27.7577	210.865	39.0457	14.3333	1	d.79.7.1	OmpA-like	0.377682	Metabolism	Cell envelope biogenesis, outer membrane	BEV	high_disorder
DS.GE.3.43.1	GE	3	43	1	3	3.2	8.7752	70.2072	39.5154	55.216	9.2	0.8	c.66.1.46	YhhF-like	0.377682	Metabolism	Transferases	ABEV	high_disorder
DS.HE.4.4.18	HE	4	4	18	9.66667	5.33333	8.136	166.964	147.019	95.3493	19	0.392058	c.66.1.46	YhhF-like	0.377682	Metabolism	Transferases	ABEV	high_disorder
DS.BN.4.131.1	BN	4	131	1	6.33333	8.66667	6.35367	139.908	316.248	84.0493	19	0.739683	b.67.2.1	alpha-L-arabinanase-like	0.377682	Metabolism	Other enzymes	ABEV	high_disorder
DS.EH.1.1.3	EH	1	1	3	4.0102	9.36735	6.45997	97.5975	59.0165	14.2674	14.3776	0.672054	c.122.1.1	L-sulfolactate dehydrogenase-like	0.377682	Metabolism	Other enzymes	ABE	high_disorder
DS.BN.9.6.1	BN	9	6	1	5.2	6.2	4.8	144.565	344.81	102.341	20.4	0.805345	c.66.1.46	YhhF-like	0.377682	Metabolism	Transferases	ABEV	high_disorder
DS.BN.20.1.1	BN	20	1	1	6	5.75	6.852	167.925	335.942	132.607	31.75	0.337427	c.122.1.1	L-sulfolactate dehydrogenase-like	0.377682	Metabolism	Other enzymes	ABE	high_disorder
DS.EH.5.172.1	EH	5	172	1	2	13.6667	12.9187	108.931	9.67167	20.675	20.6667	0.144444	c.122.1.1	L-sulfolactate dehydrogenase-like	0.377682	Metabolism	Other enzymes	ABE	moderate_disorder
DS.EH.6.53.1	EH	6	53	1	9	8.75	16.33	112.09	38.4785	73.0457	23.75	0.22962	c.122.1.1	L-sulfolactate dehydrogenase-like	0.377682	Metabolism	Other enzymes	ABE	moderate_disorder
DS.GG.1.3.3	GG	1	3	3	3	3	6.431	48.9788	199.586	104.614	7	1	c.122.1.1	L-sulfolactate dehydrogenase-like	0.377682	Metabolism	Other enzymes	ABE	high_disorder
DS.HE.3.3.15	HE	3	3	15	9.25	6	6.48425	168.768	58.1908	101.335	18.25	0.189327	c.122.1.1	L-sulfolactate dehydrogenase-like	0.377682	Metabolism	Other enzymes	ABE	moderate_disorder
DS.HE.1.2.14	HE	1	2	14	6	5.25	4.455	71.296	128.554	63.2848	12.25	0.660714	d.265.1.2	Pseudouridine synthase II TruB	0.377682	Metabolism	Nucleotide transport and metabolism	ABEV	high_disorder
DS.HE.5.86.1	HE	5	86	1	12.6	3	10.5242	152.398	349.728	127.847	20.6	0.651852	d.265.1.2	Pseudouridine synthase II TruB	0.377682	Metabolism	Nucleotide transport and metabolism	ABEV	high_disorder
DS.HE.4.175.1	HE	4	175	1	8	5.5	9.6225	148.88	152.192	121.429	17.5	0.430453	c.1.9.5	Cytosine deaminase catalytic domain	0.377682	Metabolism	Other enzymes	ABEV	high_disorder
DS.HG.2.1.9	HG	2	1	9	8	3	5.65033	49.7942	320.315	11.6783	13	0.80291	c.1.9.5	Cytosine deaminase catalytic domain	0.377682	Metabolism	Other enzymes	ABEV	high_disorder
DS.HH.4.8.4	HH	4	8	4	17.2857	19.7143	8.69714	164.736	230.783	83.4643	41	0.0986097	a.102.1.2	Cellulases catalytic domain	0.377682	Metabolism	Carbohydrate transport and metabolism	ABEV	ordered
DS.HH.2.12.1	HH	2	12	1	12	11.4286	9.49971	145.362	197.66	116.152	25.4286	0.333788	a.102.1.2	Cellulases catalytic domain	0.377682	Metabolism	Carbohydrate transport and metabolism	ABEV	high_disorder
DS.GE.4.29.1	GE	4	29	1	3	5	15.3943	83.9743	103.285	79.8	12	0.833333	d.265.1.2	Pseudouridine synthase II TruB	0.377682	Metabolism	Nucleotide transport and metabolism	ABEV	high_disorder
DS.EH.5.32.2	EH	5	32	2	8	11.25	11.371	114.96	7.6125	106.739	24.25	0.208333	d.265.1.2	Pseudouridine synthase II TruB	0.377682	Metabolism	Nucleotide transport and metabolism	ABEV	moderate_disorder
DS.HG.1.1.42	HG	1	1	42	10.8	4.4	4.4032	55.6426	70.229	17.8748	16.2	0.716944	d.79.7.1	OmpA-like	0.377682	Metabolism	Cell envelope biogenesis, outer membrane	BEV	high_disorder
DS.HE.2.4.6	HE	2	4	6	13.2857	3.71429	5.51571	66.9631	77.0061	15.4304	19	0.500537	f.46.1.1	HlyD-like secretion proteins	0.377682	Intracellular_processes	Inorganic ion transport and metabolism	BE	high_disorder
DS.BN.6.145.1	BN	6	145	1	5	4.33333	4.72667	163.975	12.1493	96.2333	15.3333	0.173913	f.46.1.1	HlyD-like secretion proteins	0.377682	Intracellular_processes	Inorganic ion transport and metabolism	BE	moderate_disorder
DS.EG.0.4.4	EG	0	4	4	6.66667	5.83333	3.82233	126.528	102.696	14.787	12.5	0.723545	d.265.1.2	Pseudouridine synthase II TruB	0.377682	Metabolism	Nucleotide transport and metabolism	ABEV	high_disorder
DS.BN.2.1.30	BN	2	1	30	6.09302	6.83721	4.67191	148.814	341.209	93.0855	14.9302	0.550762	a.102.1.4	Glycosyltransferase family 36 C-terminal domain	0.377682	Metabolism	Carbohydrate transport and metabolism	ABE	high_disorder
DS.BN.2.2.87	BN	2	2	87	10.6667	9.66667	4.668	176.822	47.3753	97.5277	22.3333	0.552483	d.265.1.2	Pseudouridine synthase II TruB	0.377682	Metabolism	Nucleotide transport and metabolism	ABEV	high_disorder
DS.BK.1.27.1	BK	1	27	1	5	3.5	5.086	108.955	89.333	62.3813	9.5	0.75	d.265.1.2	Pseudouridine synthase II TruB	0.377682	Metabolism	Nucleotide transport and metabolism	ABEV	high_disorder
DS.EH.5.113.1	EH	5	113	1	7	11.3333	10.4487	123.261	348.329	80.3167	23.3333	0.658816	d.265.1.2	Pseudouridine synthase II TruB	0.377682	Metabolism	Nucleotide transport and metabolism	ABEV	high_disorder
DS.BK.2.5.7	BK	2	5	7	5.66667	5.66667	8.01233	68.9293	144.103	15.38	13.3333	0.545238	a.102.1.4	Glycosyltransferase family 36 C-terminal domain	0.377682	Metabolism	Carbohydrate transport and metabolism	ABE	high_disorder
DS.HG.2.17.2	HG	2	17	2	12.6667	5	8.731	140.976	67.107	108.083	19.6667	0.273684	a.102.1.4	Glycosyltransferase family 36 C-terminal domain	0.377682	Metabolism	Carbohydrate transport and metabolism	ABE	moderate_disorder
DS.HH.5.47.1	HH	5	47	1	10.8333	9.83333	9.15117	144.754	16.8672	84.6768	25.6667	0.450265	c.66.1.30	N5-glutamine methyltransferase, HemK	0.377682	Metabolism	Transferases	ABEV	high_disorder
DS.GE.2.2.17	GE	2	2	17	4.4	7.8	8.5232	116.098	100.751	78.2652	14.2	0.7375	c.66.1.30	N5-glutamine methyltransferase, HemK	0.377682	Metabolism	Transferases	ABEV	high_disorder
DS.HG.0.1.67	HG	0	1	67	10.3	3	2.4767	16.2438	196.804	76.1143	13.3	0.7	a.4.5.61	PadR-like	0.381974	Regulation	DNA-binding (transcription factors)	ABEV	high_disorder
DS.BN.2.9.4	BN	2	9	4	7	7.35	4.63295	158.344	348.531	86.6762	16.35	0.6416	a.4.5.1	Biotin repressor-like	0.381974	Regulation	DNA-binding (transcription factors)	ABEV	high_disorder
DS.HH.5.89.1	HH	5	89	1	15.6667	10.6667	18.447	94.619	336.452	144.267	31.3333	0.170479	a.28.1.1	Acyl-carrier protein (ACP)	0.381974	Other	Function unknown	ABEV	moderate_disorder
DS.HE.3.7.4	HE	3	7	4	9.75	4.875	10.5077	143.161	27.9575	95.9771	17.625	0.470948	c.92.2.4	TM0189-like	0.381974	General	General or several functions	ABE	high_disorder
DS.BN.4.48.2	BN	4	48	2	8.5	4.25	6.1965	167.115	358.532	130.429	16.75	0.58785	b.82.1.8	Hypothetical protein TM1112	0.381974	Metabolism	Nitrogen metabolism	ABEV	high_disorder
DS.HH.5.42.1	HH	5	42	1	13	10.5	12.9895	107.608	334.369	117.432	28.5	0.482026	a.4.5.69	HxlR-like	0.381974	Regulation	DNA-binding (transcription factors)	ABEV	high_disorder
DS.HE.5.21.4	HE	5	21	4	11.3333	3	11.6997	142.985	106.599	108.511	19.3333	0.477778	a.4.5.1	Biotin repressor-like	0.381974	Regulation	DNA-binding (transcription factors)	ABEV	high_disorder
DS.HE.3.7.11	HE	3	7	11	8.83333	6.33333	11.009	124.669	30.4258	99.2347	18.1667	0.243565	c.146.1.1	YgbK-like	0.381974	N_A	not annotated	ABE	moderate_disorder
DS.HH.4.22.3	HH	4	22	3	11.75	13.25	10.7445	85.892	25.444	85.0905	29	0.200052	a.174.1.1	Double Clp-N motif	0.381974	Intracellular_processes	Posttranslational modification, protein turnover, chaperones	ABEV	moderate_disorder
DS.HH.3.17.4	HH	3	17	4	8.25	10.75	10.7545	139.851	338.99	95.783	22	0.54559	a.28.1.1	Acyl-carrier protein (ACP)	0.381974	Other	Function unknown	ABEV	high_disorder
DS.BN.5.40.1	BN	5	40	1	5.54545	4.63636	4.90155	166.114	343.714	99.3127	15.1818	0.482832	a.4.5.69	HxlR-like	0.381974	Regulation	DNA-binding (transcription factors)	ABEV	high_disorder
DS.GE.5.11.1	GE	5	11	1	3	4.4	12.1828	127.859	9.3742	96.921	12.4	0.688095	c.2.1.13	Ornithine cyclodeaminase-like	0.381974	General	Small molecule binding	ABE	high_disorder
DS.HH.4.7.2	HH	4	7	2	22.25	12.5833	10.7762	124.713	21.3208	123.211	38.8333	0.255439	a.174.1.1	Double Clp-N motif	0.381974	Intracellular_processes	Posttranslational modification, protein turnover, chaperones	ABEV	moderate_disorder
DS.HE.4.1.27	HE	4	1	27	11.25	3	9.492	158.864	4.883	112.172	18.25	0.67803	a.174.1.1	Double Clp-N motif	0.381974	Intracellular_processes	Posttranslational modification, protein turnover, chaperones	ABEV	high_disorder
DS.EH.3.3.9	EH	3	3	9	5.33333	13	9.66867	171.495	61.1287	71.3777	21.3333	0.373737	c.2.1.13	Ornithine cyclodeaminase-like	0.381974	General	Small molecule binding	ABE	high_disorder
DS.HH.6.24.1	HH	6	24	1	14.2	8.6	16.4628	111.176	333.711	128.164	28.8	0.309506	a.28.1.1	Acyl-carrier protein (ACP)	0.381974	Other	Function unknown	ABEV	high_disorder
DS.EH.3.2.6	EH	3	2	6	5.26667	11.4	8.47327	153.064	26.2528	50.7376	19.6667	0.599984	c.2.1.13	Ornithine cyclodeaminase-like	0.381974	General	Small molecule binding	ABE	high_disorder
DS.EH.1.5.31	EH	1	5	31	5.66667	9	4.99033	52.699	205.28	14.1917	15.6667	0.769231	c.2.1.13	Ornithine cyclodeaminase-like	0.381974	General	Small molecule binding	ABE	high_disorder
DS.HE.4.139.1	HE	4	139	1	7	2.6	9.5558	169.26	161.946	126.688	13.6	0.885714	c.14.1.1	Clp protease, ClpP subunit	0.386266	Intracellular_processes	Proteases, peptidases and their inhibitors	ABEV	high_disorder
DS.HE.2.11.6	HE	2	11	6	4	4.75	6.089	57.5847	54.8088	36.8323	10.75	1	c.129.1.1	MoCo carrier protein-like	0.386266	Metabolism	Other enzymes	ABEV	high_disorder
DS.EH.5.177.1	EH	5	177	1	4.33333	10	8.72467	153.86	169.117	71.2313	19.3333	0.31384	c.129.1.1	MoCo carrier protein-like	0.386266	Metabolism	Other enzymes	ABEV	high_disorder
DS.HE.3.43.4	HE	3	43	4	17.75	8.75	12.3785	143.341	342.925	138.66	29.5	0.30448	e.8.1.7	Lesion bypass DNA polymerase (Y-family), catalytic domain	0.386266	Information	DNA replication, recombination, repair	ABEV	high_disorder
DS.GE.1.4.9	GE	1	4	9	3	4	5.2612	76.115	123.967	102.572	8	1	e.8.1.7	Lesion bypass DNA polymerase (Y-family), catalytic domain	0.386266	Information	DNA replication, recombination, repair	ABEV	high_disorder
DS.BN.5.66.1	BN	5	66	1	5.85714	3.71429	8.87586	148.876	341.163	148.012	14.5714	0.704313	b.82.1.5	Quercetin 2,3-dioxygenase-like	0.386266	Metabolism	Nitrogen metabolism	ABEV	high_disorder
DS.HH.3.6.29	HH	3	6	29	5.66667	13	7.504	119.76	25.7167	35.9227	21.6667	0.355108	a.3.1.1	monodomain cytochrome c	0.386266	Metabolism	Electron transfer/transport	ABE	high_disorder
DS.BK.5.62.1	BK	5	62	1	3.5	5.5	8.97425	153.191	127.486	86.1792	14	0.573661	b.82.1.5	Quercetin 2,3-dioxygenase-like	0.386266	Metabolism	Nitrogen metabolism	ABEV	high_disorder
DS.BK.4.183.1	BK	4	183	1	2.66667	7.33333	9.29933	119.171	75.8093	39.1947	14	0.52381	b.82.1.5	Quercetin 2,3-dioxygenase-like	0.386266	Metabolism	Nitrogen metabolism	ABEV	high_disorder
DS.HG.3.2.12	HG	3	2	12	11	3.75	7.22325	155.577	32.8533	99.0687	17.75	0.68287	a.3.1.1	monodomain cytochrome c	0.386266	Metabolism	Electron transfer/transport	ABE	high_disorder
DS.EH.4.173.1	EH	4	173	1	2.33333	6.33333	12.7907	127.68	107.948	9.25533	12.6667	0.822222	e.8.1.7	Lesion bypass DNA polymerase (Y-family), catalytic domain	0.386266	Information	DNA replication, recombination, repair	ABEV	high_disorder
DS.EG.1.44.1	EG	1	44	1	5.75	3	6.59925	71.4675	280.43	11.619	9.75	1	c.129.1.1	MoCo carrier protein-like	0.386266	Metabolism	Other enzymes	ABEV	high_disorder
DS.HG.0.1.189	HG	0	1	189	7.66667	3.33333	2.53333	15.1433	37.535	68.7887	11	1	a.3.1.1	monodomain cytochrome c	0.386266	Metabolism	Electron transfer/transport	ABE	high_disorder
DS.GH.2.6.3	GH	2	6	3	3.2	9.6	6.4078	23.182	57.8448	49.0292	14.8	0.770833	d.126.1.3	Dimethylarginine dimethylaminohydrolase DDAH	0.386266	General	General or several functions	ABEV	high_disorder
DS.EH.1.12.3	EH	1	12	3	5.2	13.2	7.291	104.784	191.906	19.3736	19.4	0.158042	c.14.1.1	Clp protease, ClpP subunit	0.386266	Intracellular_processes	Proteases, peptidases and their inhibitors	ABEV	moderate_disorder
DS.EH.1.4.18	EH	1	4	18	6.2	6	4.4398	94.6738	173.447	48.6028	13.2	0.422222	c.14.1.1	Clp protease, ClpP subunit	0.386266	Intracellular_processes	Proteases, peptidases and their inhibitors	ABEV	high_disorder
DS.HE.4.57.3	HE	4	57	3	9.33333	6.33333	9.46	147.709	121.906	82.4047	19.6667	0.220679	c.14.1.1	Clp protease, ClpP subunit	0.386266	Intracellular_processes	Proteases, peptidases and their inhibitors	ABEV	moderate_disorder
DS.HE.3.33.3	HE	3	33	3	13.4	5.2	8.0524	143.443	82.9064	95.6908	21.6	0.296529	c.129.1.1	MoCo carrier protein-like	0.386266	Metabolism	Other enzymes	ABEV	moderate_disorder
DS.HE.4.156.1	HE	4	156	1	10.25	2	9.31325	109.609	94.9305	68.4605	16.25	0.680672	c.19.1.1	FabD-like	0.386266	Metabolism	Transferases	ABE	high_disorder
DS.HE.4.1.22	HE	4	1	22	9.42857	3.71429	10.436	140.215	53.6623	84.4311	17.1429	0.561111	c.19.1.1	FabD-like	0.386266	Metabolism	Transferases	ABE	high_disorder
DS.EG.1.49.1	EG	1	49	1	6.66667	4	7.36933	126.017	93.9363	9.26433	11.6667	0.777778	d.126.1.3	Dimethylarginine dimethylaminohydrolase DDAH	0.386266	General	General or several functions	ABEV	high_disorder
DS.EH.3.86.1	EH	3	86	1	4	8	4.7255	148.817	76.8115	58.761	15	0.25	c.19.1.1	FabD-like	0.386266	Metabolism	Transferases	ABE	moderate_disorder
DS.BK.6.81.1	BK	6	81	1	4.33333	7.33333	10.7423	150.642	119.404	109.976	17.6667	0.629915	b.82.1.11	YlbA-like	0.386266	Metabolism	Nitrogen metabolism	ABEV	high_disorder
DS.HE.5.30.2	HE	5	30	2	10.4	5.8	7.5934	148.305	106.339	100.021	21.2	0.343451	c.129.1.1	MoCo carrier protein-like	0.386266	Metabolism	Other enzymes	ABEV	high_disorder
DS.HE.4.33.2	HE	4	33	2	8.5	4.5	11.3775	160.415	49.0163	113.887	17	0.288492	e.8.1.7	Lesion bypass DNA polymerase (Y-family), catalytic domain	0.386266	Information	DNA replication, recombination, repair	ABEV	moderate_disorder
DS.EH.2.53.1	EH	2	53	1	5.2	12.4	9.531	61.776	15.7264	30.785	19.6	0.3405	d.17.4.8	Limonene-1,2-epoxide hydrolase-like	0.386266	Intracellular_processes	Transport	ABEV	high_disorder
DS.BK.3.151.1	BK	3	151	1	3.33333	5	6.71733	128.105	140.71	56.4493	11.3333	0.666667	b.82.1.11	YlbA-like	0.386266	Metabolism	Nitrogen metabolism	ABEV	high_disorder
DS.BK.15.4.1	BK	15	4	1	8	7	18.8183	67.072	207.725	144.367	30	0.266667	b.82.1.11	YlbA-like	0.386266	Metabolism	Nitrogen metabolism	ABEV	moderate_disorder
DS.BK.1.8.2	BK	1	8	2	7.5	5.75	6.71625	104.585	78.2041	68.9398	14.25	0.325176	b.82.1.11	YlbA-like	0.386266	Metabolism	Nitrogen metabolism	ABEV	high_disorder
DS.GE.1.5.8	GE	1	5	8	3	4.6	6.1732	77.4022	141.282	75.031	8.6	0.861538	d.58.28.1	Peptide methionine sulfoxide reductase	0.390558	Intracellular_processes	Posttranslational modification, protein turnover, chaperones	ABEV	high_disorder
DS.HE.3.43.5	HE	3	43	5	13.75	7	11.6282	149.121	97.587	137.866	23.75	0.349826	c.1.9.12	TatD Mg-dependent DNase-like	0.390558	Metabolism	Other enzymes	ABE	high_disorder
DS.EH.3.20.5	EH	3	20	5	6	4.33333	8.34333	60.0497	26.983	37.9367	13.3333	0.854167	d.110.3.7	Hypoxia-inducible factor Hif2a, C-terminal domain	0.390558	Regulation	Signal transduction	ABE	high_disorder
DS.EG.4.8.2	EG	4	8	2	5.66667	3	12.4333	113.086	98.7263	9.998	12.6667	0.666667	c.1.9.12	TatD Mg-dependent DNase-like	0.390558	Metabolism	Other enzymes	ABE	high_disorder
DS.EH.4.107.1	EH	4	107	1	5	10.75	13.6617	153.96	70.909	16.1165	19.75	0.357143	c.1.9.12	TatD Mg-dependent DNase-like	0.390558	Metabolism	Other enzymes	ABE	high_disorder
DS.EG.2.5.7	EG	2	5	7	4.33333	5	9.58283	122.044	28.5107	38.4797	11.3333	0.904762	c.66.1.24	rRNA adenine dimethylase-like	0.390558	Metabolism	Transferases	ABEV	high_disorder
DS.BN.6.56.1	BN	6	56	1	7.8	9.6	4.2982	103.491	353.716	86.611	23.4	0.492928	d.110.3.7	Hypoxia-inducible factor Hif2a, C-terminal domain	0.390558	Regulation	Signal transduction	ABE	high_disorder
DS.HE.5.14.6	HE	5	14	6	9.33333	6.33333	8.604	122.439	144.145	63.7453	20.6667	0.381758	c.1.9.12	TatD Mg-dependent DNase-like	0.390558	Metabolism	Other enzymes	ABE	high_disorder
DS.EH.3.1.21	EH	3	1	21	5	9.42857	11.0147	123.549	115.427	20.3019	17.4286	0.710612	d.3.1.5	Arylamine N-acetyltransferase	0.390558	Intracellular_processes	Proteases, peptidases and their inhibitors	ABEV	high_disorder
DS.EH.1.6.14	EH	1	6	14	4.25	5.5	6.27675	27.5497	250.893	34.1048	10.75	0.565789	d.3.1.5	Arylamine N-acetyltransferase	0.390558	Intracellular_processes	Proteases, peptidases and their inhibitors	ABEV	high_disorder
DS.HE.4.147.1	HE	4	147	1	9.25	8	7.69925	108.983	154.331	36.9265	21.25	0.223019	c.1.9.12	TatD Mg-dependent DNase-like	0.390558	Metabolism	Other enzymes	ABE	moderate_disorder
DS.EG.3.44.1	EG	3	44	1	5.5	6.75	13.109	59.1108	213.098	54.479	15.25	0.602679	c.1.9.12	TatD Mg-dependent DNase-like	0.390558	Metabolism	Other enzymes	ABE	high_disorder
DS.BN.2.2.53	BN	2	2	53	8.71429	6.85714	5.01043	155.991	338.771	107.133	17.5714	0.630962	d.3.1.5	Arylamine N-acetyltransferase	0.390558	Intracellular_processes	Proteases, peptidases and their inhibitors	ABEV	high_disorder
DS.BN.2.2.49	BN	2	2	49	7.33333	6.44444	4.84844	170.217	347.434	96.9538	15.7778	0.546162	d.58.28.1	Peptide methionine sulfoxide reductase	0.390558	Intracellular_processes	Posttranslational modification, protein turnover, chaperones	ABEV	high_disorder
DS.EG.1.2.18	EG	1	2	18	4.38462	3.69231	6.48946	80.573	160.272	15.0765	9.07692	0.923077	c.1.9.12	TatD Mg-dependent DNase-like	0.390558	Metabolism	Other enzymes	ABE	high_disorder
DS.HH.2.1.95	HH	2	1	95	11.3333	32.6667	5.211	16.8813	124.029	19.2127	46	0.419192	h.4.5.1	Methyl-accepting chemotaxis protein (MCP) signaling domain	0.390558	Regulation	Receptor activity	ABEV	high_disorder
DS.EH.2.1.29	EH	2	1	29	5.52941	11.8235	8.25841	162.395	82.6146	54.4479	19.3529	0.585175	d.58.28.1	Peptide methionine sulfoxide reductase	0.390558	Intracellular_processes	Posttranslational modification, protein turnover, chaperones	ABEV	high_disorder
DS.EG.2.13.4	EG	2	13	4	4	4	9.55971	96.0541	21.8111	8.97129	10	0.857143	d.58.28.1	Peptide methionine sulfoxide reductase	0.390558	Intracellular_processes	Posttranslational modification, protein turnover, chaperones	ABEV	high_disorder
DS.EG.1.8.5	EG	1	8	5	4.2	3	6.6266	147.054	115.443	26.1366	8.2	0.8	d.58.28.1	Peptide methionine sulfoxide reductase	0.390558	Intracellular_processes	Posttranslational modification, protein turnover, chaperones	ABEV	high_disorder
DS.BK.5.3.1	BK	5	3	1	5.71429	6.57143	6.84743	157.62	30.6291	55.0917	17.2857	0.840778	b.3.4.1	Transthyretin (synonym: prealbumin)	0.390558	General	General or several functions	ABE	high_disorder
DS.BN.5.3.4	BN	5	3	4	5.50943	5.98113	4.32933	118.711	4.13756	86.187	16.4906	0.642136	d.160.1.1	Nitrilase	0.390558	Metabolism	Other enzymes	ABE	high_disorder
DS.EH.1.1.68	EH	1	1	68	6.25	6	5.659	12.1367	292.882	20.291	13.25	0.464286	b.3.4.1	Transthyretin (synonym: prealbumin)	0.390558	General	General or several functions	ABE	high_disorder
DS.EG.0.25.1	EG	0	25	1	4.25	3.25	3.75725	58.3073	267.579	35.2478	7.5	1	d.166.1.7	CC0527-like	0.390558	Metabolism	Secondary metabolites biosynthesis, transport and catabolism	ABE	high_disorder
DS.EH.3.84.1	EH	3	84	1	5	10	11.5567	55.577	239.438	10.2282	18	0.5725	d.166.1.7	CC0527-like	0.390558	Metabolism	Secondary metabolites biosynthesis, transport and catabolism	ABE	high_disorder
DS.HH.2.1.19	HH	2	1	19	11.2857	10.1429	5.7	28.3599	196.42	11.0969	23.4286	0.421104	h.4.5.1	Methyl-accepting chemotaxis protein (MCP) signaling domain	0.390558	Regulation	Receptor activity	ABEV	high_disorder
DS.HE.4.199.1	HE	4	199	1	10.6667	5	10.7627	155.79	34.391	102.214	19.6667	0.671278	c.37.1.3	Chloramphenicol phosphotransferase	0.390558	General	Small molecule binding	ABEV	high_disorder
DS.EH.5.47.2	EH	5	47	2	4.33333	12.3333	9.71833	167.679	332.857	76.9167	21.6667	0.450886	c.37.1.3	Chloramphenicol phosphotransferase	0.390558	General	Small molecule binding	ABEV	high_disorder
DS.EH.2.5.7	EH	2	5	7	8.33333	14.3333	8.64133	115.469	162.582	56.4613	24.6667	0.333756	d.136.1.4	Polyphosphate kinase C-terminal domain	0.390558	Metabolism	Other enzymes	ABEV	high_disorder
DS.EH.3.32.1	EH	3	32	1	9.28571	11	11.1201	105.395	164.035	23.9431	23.2857	0.450156	d.136.1.4	Polyphosphate kinase C-terminal domain	0.390558	Metabolism	Other enzymes	ABEV	high_disorder
DS.GH.2.1.8	GH	2	1	8	3.03846	12.8462	9.14527	161.664	80.9887	78.4985	17.8846	0.666628	d.1.1.2	Bacterial ribonucleases	0.390558	Information	DNA replication, recombination, repair	AB	high_disorder
DS.BN.6.46.1	BN	6	46	1	5.5	5.33333	4.79117	153.036	348.202	99.007	16.8333	0.703305	d.1.1.2	Bacterial ribonucleases	0.390558	Information	DNA replication, recombination, repair	AB	high_disorder
DS.EG.3.7.2	EG	3	7	2	3	3.66667	5.82933	148.026	19.3437	71.9633	9.66667	1	d.92.1.2	Thermolysin-like	0.390558	Intracellular_processes	Proteases, peptidases and their inhibitors	ABE	high_disorder
DS.HH.3.8.4	HH	3	8	4	10.9091	9.72727	6.59773	96.2723	77.0855	83.0793	23.6364	0.426829	c.23.16.4	Aspartyl dipeptidase PepE	0.39485	Metabolism	Transferases	ABE	high_disorder
DS.EH.1.3.6	EH	1	3	6	4.55	7.65	5.7977	56.2603	285.187	17.9062	13.2	0.658586	a.203.1.1	Putative anticodon-binding domain of alanyl-tRNA synthetase (AlaRS)	0.39485	Metabolism	Other enzymes	ABE	high_disorder
DS.HE.4.4.5	HE	4	4	5	12.9333	5.6	9.04147	140.887	14.3192	108.384	22.5333	0.425895	a.203.1.1	Putative anticodon-binding domain of alanyl-tRNA synthetase (AlaRS)	0.39485	Metabolism	Other enzymes	ABE	high_disorder
DS.HH.5.3.9	HH	5	3	9	8	8.33333	9.41467	129.841	5.261	100.699	21.3333	0.468414	a.203.1.1	Putative anticodon-binding domain of alanyl-tRNA synthetase (AlaRS)	0.39485	Metabolism	Other enzymes	ABE	high_disorder
DS.EH.5.67.1	EH	5	67	1	2.8	10.8	12.7972	160.021	144.089	34.815	18.6	0.340036	c.1.9.7	Renal dipeptidase	0.39485	Metabolism	Other enzymes	ABE	high_disorder
DS.EG.3.2.1	EG	3	2	1	4	3	12.4477	61.9282	295.557	29.5483	10	1	c.1.9.7	Renal dipeptidase	0.39485	Metabolism	Other enzymes	ABE	high_disorder
DS.HE.4.41.1	HE	4	41	1	15.8333	5.16667	7.53567	126.439	170.089	95.7362	25	0.244633	c.1.9.7	Renal dipeptidase	0.39485	Metabolism	Other enzymes	ABE	moderate_disorder
DS.HH.1.6.3	HH	1	6	3	8.90909	10.5455	4.24064	52.9795	98.1005	82.5859	20.4545	0.477979	c.1.9.7	Renal dipeptidase	0.39485	Metabolism	Other enzymes	ABE	high_disorder
DS.HE.3.29.3	HE	3	29	3	13.6667	4.66667	6.70667	114.471	128.37	84.3788	21.3333	0.405589	c.23.16.4	Aspartyl dipeptidase PepE	0.39485	Metabolism	Transferases	ABE	high_disorder
DS.HE.4.11.1	HE	4	11	1	13.2941	5.23529	10.8826	162.203	38.0582	117.824	22.5294	0.307733	c.23.16.4	Aspartyl dipeptidase PepE	0.39485	Metabolism	Transferases	ABE	high_disorder
DS.GE.2.7.3	GE	2	7	3	3	5.33333	8.879	142.362	48.413	131.237	10.3333	1	c.23.16.4	Aspartyl dipeptidase PepE	0.39485	Metabolism	Transferases	ABE	high_disorder
DS.BK.3.2.6	BK	3	2	6	5.83333	3.83333	9.04517	128.363	75.6142	49.699	12.6667	0.680556	d.41.4.2	Ribosomal protein L16p	0.39485	Information	Translation, ribosomes, ribosome biogenesis; tRNA metabolism	BE	high_disorder
DS.HH.2.14.2	HH	2	14	2	23.1667	13.1667	8.92817	151.515	167.898	80.137	38.3333	0.430045	d.188.1.1	Prokaryotic ribosomal protein L17	0.39485	Information	Translation, ribosomes, ribosome biogenesis; tRNA metabolism	BE	high_disorder
DS.EG.1.2.39	EG	1	2	39	7.5	4	6.481	84.1048	95.3675	6.20867	12.5	0.859069	c.1.17.1	NadC C-terminal domain-like	0.399142	Metabolism	Nucleotide transport and metabolism	ABEV	high_disorder
DS.EH.9.6.1	EH	9	6	1	2.75	10.25	14.7777	158.102	13.2762	28.4707	22	0.456404	c.1.17.1	NadC C-terminal domain-like	0.399142	Metabolism	Nucleotide transport and metabolism	ABEV	high_disorder
DS.GE.3.3.3	GE	3	3	3	3.25	4	10.4755	142.169	17.8057	110.374	10.25	1	c.1.17.1	NadC C-terminal domain-like	0.399142	Metabolism	Nucleotide transport and metabolism	ABEV	high_disorder
DS.EH.2.1.83	EH	2	1	83	5.25	12	9.123	130.743	120.096	39.9787	19.25	0.452399	b.122.1.10	LON domain-like	0.399142	Regulation	RNA processing and modification	ABE	high_disorder
DS.BN.4.42.2	BN	4	42	2	4	3.75	4.8435	145.238	336.845	97.1388	11.75	0.446429	b.40.4.4	Myf domain	0.399142	Information	DNA replication, recombination, repair	ABEV	high_disorder
DS.BK.2.4.9	BK	2	4	9	2.8	4.4	8.3762	62.5946	98.1158	41.4804	9.2	1	b.40.4.4	Myf domain	0.399142	Information	DNA replication, recombination, repair	ABEV	high_disorder
DS.BN.6.69.1	BN	6	69	1	8.2	6.4	4.3084	147.749	11.8858	91.9966	20.6	0.586878	b.40.4.4	Myf domain	0.399142	Information	DNA replication, recombination, repair	ABEV	high_disorder
DS.BK.1.6.5	BK	1	6	5	2	4	5.72933	49.4523	98.1327	19.8687	7	1	b.40.4.4	Myf domain	0.399142	Information	DNA replication, recombination, repair	ABEV	high_disorder
DS.HH.2.1.106	HH	2	1	106	10	9.33333	6.411	37.0583	279.263	6.61767	21.3333	0.420875	a.113.1.1	DNA repair protein MutS, domain III	0.399142	Information	DNA replication, recombination, repair	ABEV	high_disorder
DS.HH.2.1.31	HH	2	1	31	14.6	16.2	6.7232	51.5904	349.117	15.6756	32.8	0.367457	a.113.1.1	DNA repair protein MutS, domain III	0.399142	Information	DNA replication, recombination, repair	ABEV	high_disorder
DS.HE.6.40.1	HE	6	40	1	12.25	7	8.6865	156.706	22.2915	79.7232	25.25	0.366923	c.76.1.1	Alkaline phosphatase	0.399142	Metabolism	Other enzymes	ABE	high_disorder
DS.HE.4.260.1	HE	4	260	1	18.6667	8.33333	11.3773	59.868	100.365	49.988	31	0.222177	e.10.1.1	Prokaryotic type I DNA topoisomerase	0.399142	Information	DNA replication, recombination, repair	ABEV	moderate_disorder
DS.HH.1.1.133	HH	1	1	133	15.75	4	5.815	145.073	82.0023	70.115	20.75	0.348291	e.10.1.1	Prokaryotic type I DNA topoisomerase	0.399142	Information	DNA replication, recombination, repair	ABEV	high_disorder
DS.HH.5.6.6	HH	5	6	6	14.25	16	9.44825	155.723	62.484	91.2152	35.25	0.280818	e.10.1.1	Prokaryotic type I DNA topoisomerase	0.399142	Information	DNA replication, recombination, repair	ABEV	moderate_disorder
DS.GE.2.14.4	GE	2	14	4	3	7.66667	8.85	88.7343	102.213	92.6357	12.6667	0.729167	b.40.4.4	Myf domain	0.399142	Information	DNA replication, recombination, repair	ABEV	high_disorder
DS.GE.2.2.16	GE	2	2	16	3.4	6.6	8.1258	127.083	123.099	72.6726	12	0.906667	c.76.1.1	Alkaline phosphatase	0.399142	Metabolism	Other enzymes	ABE	high_disorder
DS.BN.3.9.5	BN	3	9	5	5.25	6.5	4.494	174.857	356.111	94.7382	14.75	0.527778	a.113.1.1	DNA repair protein MutS, domain III	0.399142	Information	DNA replication, recombination, repair	ABEV	high_disorder
DS.EG.2.1.10	EG	2	1	10	6.09091	3.63636	7.35382	102.588	7.33473	54.6341	11.7273	0.867133	d.67.3.1	Ribosome recycling factor, RRF	0.399142	Information	Translation, ribosomes, ribosome biogenesis; tRNA metabolism	BE	high_disorder
DS.BN.2.24.6	BN	2	24	6	4.25	5.75	4.63325	155.82	346.694	83.9903	12	0.84375	d.67.3.1	Ribosome recycling factor, RRF	0.399142	Information	Translation, ribosomes, ribosome biogenesis; tRNA metabolism	BE	high_disorder
DS.HH.4.1.13	HH	4	1	13	10.9	11	10.5732	139.416	10.3025	95.5561	25.9	0.236005	a.152.1.1	AhpD	0.399142	Extracellular_processes	Toxins and defense enzymes	ABE	moderate_disorder
[truncated: 3,127 more rows]
